# Supplementary material
Source: Research Square preprint supplement (doi:10.21203/rs.3.rs-9148671/v1)
Supplement: Supplementary file 1 [file 0989d09ac29c84069ba3996a.xlsx]

## Sheet: Table_of_contents
Table number	Title	Legend	Column description
Table S1	Descriptive statistics of the study samples	Description of basic phenotypes for all women. Mean and S.D. for quantitative phenotypes are given for visit 1 only
Table S2.	Association analysis between hormones or CMD phenotypes with mentrual cycle phase	The results of association analysis based on GAMs (columns B-F) and LMMs (columns I-J). NB: P-values estimated for smooth terms in GAMs are only approximate; very strong effects give the p-values equal to zero, meaning that there is very strong evidence that the effect of visit on protein levels is different from a horizontal line.	Columns: hormone_phenotype - hormone/phenotype name; gam_pval - p-value of the significance of the smooth term of the menstrual phase (numeric); gam_BH_pval - BH-adjusted p-value of the phase number; gam_edf - estimated degrees of freedom of the phase term; gam_edf_round - rounded gam_edf; gam_fval - F statistics of the phase smooth term; n - number of samples used in the model; n_ids - number of…
Table S3.	Description of proteins measured	The list of proteins measured using 3 Olink panels in our cohort.	Columns: Assay - assay name of the protein (corresponds to its coding gene name); UniProt - UniProt ID of the protein; single_coding_gene - whether protein is encoded by one gene; OlinkID: the Olink ID of the Assay in Olink Explore HT panel; OlinkID_E3072 - Olink ID of the assay in Olink 384 panels; BridgingRecommendation: the method recommended for bridging (NA if no bridging was performed for t…
Table S4.	Association of protein PCs with covariates	Association of PCs calculated on the proteomics dataset with the most important covariates at each visit	Columns: Visit_number - the visit number; PC - PC number; covariate - covariate name; pval: association significance based on linear regression (continuous covariates) or Kruskall-Wallis test (categorical covariates); bonferroni_signif - whether the association was Bonferroni-significant (at each visit); logp - -log10(P-value)
Table S5.	Intraclass correlation coefficient for each protein	ICC reflects the proportion of variance explained by differences between individuals as opposed to phase contribution to protein variance	Columns: protein - gene name; ICC - intraclass correlation coefficient; R2_phase - marginal R2 representing variance explained by the timepoint
Table S6.	Differentially abundant proteins	Differentially abundant proteins (DAPs) were calculated by limma with covariate adjustment, comparing all pairs of phases	Columns: phase1_phase2 - phase pair; prot - gene name; logFC - log2 fold change of the difference in protein abundance in phase 2 vs phase 1; CI.L - left limit of confidence interval for logFC;CI.R - right limit of confidence interval for logFC; AveExpr - average log2-abundance of the protein;t - moderated t-statistic; P.Value - raw p-value; adj.P.Val - adjusted p-value; B - log-odds that the gen…
Table S7.	Protein abundance changes during the menstrual cycle	Association between protein levels and menstrual cycle phase modelled using GAMs. NB: P-values estimated for smooth terms in GAMs are only approximate; very strong effects give the p-values equal to zero, meaning that there is very strong evidence that the effect of visit on protein levels is different from a horizontal line.	Columns: protein - protein name; gam_pval - p-value of the significance of the smooth term of the menstrual phase (numeric); gam_BH_pval - BH-adjusted p-value of the phase number; gam_edf - estimated degrees of freedom of the phase term; gam_edf_round - rounded gam_edf; gam_fval - F statistics of the phase smooth term; n - number of samples used in the model; n_ids - number of unique women used i…
Table S8.	Protein abundance changes during the menstrual cycle for batch 2 proteins	Association between protein levels measured only in batch 2 samples and menstrual cycle phase modelled using GAMs. NB: P-values estimated for smooth terms in GAMs are only approximate; very strong effects give the p-values equal to zero, meaning that there is very strong evidence that the effect of visit on protein levels is different from a horizontal line.	Columns: protein - protein name; gam_pval - p-value of the significance of the smooth term of the menstrual phase (numeric); gam_BH_pval - BH-adjusted p-value of the phase number; gam_edf - estimated degrees of freedom of the phase term; gam_edf_round - rounded gam_edf; gam_fval - F statistics of the phase smooth term; n - number of samples used in the model; n_ids - number of unique women used i…
Table S9.	Association analysis between sex hormones and protein levels	Association between hormone and protein levels was estimated using GAMs. Longitudinal causality results were added to the associations. All significant associations were annotated manually based on existing literature to determine if there is biological evidence for the association.	Columns: protein - protein name; hormone - hormone name; pval - significance of the association; BH_pval - BH-adjusted p-value; estimate - estimate of the size of hormone parametric (linear) effect on protein levels; SE - standard error of the estimate; n - number of samples used in the model; n_ids - number of unique women used in the model; lmm_pval - p-value of hormone - protein association ca…
Table S10.	Association analysis between sex hormones and protein levels for proteins measured only in batch 2 samples	Association between hormone and protein levels was estimated using GAMs.	Columns: protein - protein name; hormone - hormone name; pval - significance of the association; BH_pval - BH-adjusted p-value; estimate - estimate of the size of hormone parametric (linear) effect on protein levels; SE - standard error of the estimate; n - number of samples used in the model; n_ids - number of unique women used in the model; lmm_pval - p-value of hormone - protein association ca…
Table S11.	Enrichment analysis of the proteins associated with phenotype groups	Enrichment analysis was performed using FUMA for all significantly associated proteins both from the main analysis and from batch2 analysis per phenotype category: hormones, lipids, transaminases, glycemic traits	Columns: Hormone/phenotype_Category - phenotype category; Pathway_category - pathway category; GeneSet - the name of the gene set; N_genes - number of genes in the set; N_overlap - number of genes overlapping with the query set; p - enrichment p-value; adjP - adjusted enrichment p-value; genes - overlapping genes; link - link to gene set description
Table S12.	Replication of proteins associated with sex hormones	Associations reported in relevant papers (Nguyen et al. 2025, Tarca et al. 2022) for proteins significantly associated with either progesterone or estrogen in our results (W4H)	Columns: protein - protein name; estimate_PROG - effect size for association with progesterone in our data; p.adj_PROG - BH-adjusted p-value for association with progesterone in our data; estimate_17BES - effect size for association with estrogen in our data; p.adj_17BES - BH-adjusted p-value for association with estrogen in our data; replicated_PROG_no_GAHT - whether the association is significa…
Table S13.	Association analysis between CMD phenotypes and protein levels.	Association between CMD phenotypes and protein levels was estimated using GAMs. Longitudinal causality results were added to the associations.	Columns: protein - protein name; phenotype - phenotype name; pval - significance of the association; BH_pval - BH-adjusted p-value; estimate - estimate of the size of CMD phenotype parametric (linear) effect on protein levels; SE - standard error of the estimate; n - number of samples used in the model; n_ids - number of unique women used in the model; lmm_pval - p-value of CMD phenotype - protei…
Table S14.	Association analysis between CMD phenotypes and protein levels for proteins measured only in batch 2 samples.	Association between CMD phenotypes and protein levels was estimated using GAMs.	Columns: protein - protein name; phenotype - phenotype name; pval - significance of the association; BH_pval - BH-adjusted p-value; estimate - estimate of the size of CMD phenotype parametric (linear) effect on protein levels; SE - standard error of the estimate; n - number of samples used in the model; n_ids - number of unique women used in the model; lmm_pval - p-value of CMD phenotype - protei…
Table S15.	Evidence for temporal causality for significant associations.	Temporal causality was estimated using SEM (lag models) in both directions, checking the effect of the protein at phase i on phenotype at phase i+1 adjusting for phenotype levels at phase i and the effect of phenotype at phase i on protein levels at phase i+1 adjusting for protein levels at phase i. Therefore estimates should be treated accordingly. Causality was estimated only for significant as…	Columns: category - hormone or phenotype association with protein; X - feature X; Y - feature Y; summary_full - summary of putative causal direction at each consecutive phase pairs; summary_short - summary of putative causal direction only for significant causality links; direction_{i}_to_{i+1} - the result of testing for causality between phase {i+2} vs phase {i}; p_sem_X{i}_to_Y{i+1} - p-value …

## Sheet: S1.cohort_descr
Table S1. Descriptive statistics of the study samples
Description of basic phenotypes for all women. Mean and S.D. for quantitative phenotypes are given for visit 1 only
Variable	Unit	N or Mean (SD) or % for categorical variables
Samples per center - Cagliari/Bologna/Trieste		127/246/468
Women per center - Cagliari/Bologna/Trieste		23/36/97
Age	years	29.29 (7.12)
BMI (Body Mass index)	kg/m2	21.97 (2.93)
WHR (Waist Hip Ratio)	NA	0.76 (0.07)
Current smokers	NA	16.67 (%)
Had at least one pregnancy in the past	NA	19.87 (%)
AST (Aspartate aminotransferase)	U/L	12.8 (2.98)
ALT (Alanine aminotransferase)	U/L	12.09 (3.1)
GL (Glucose)	mg/dL	95.5 (4.35)
TRI (Triglycerides)	mg/dL	117.29 (29.52)
COL (Total cholesterol)	mg/dL	171.57 (32.47)
LDL (LDL cholesterol)(Friedman formula)	mg/dL	102.84 (28.56)
HDL (HDL cholesterol)	mg/dL	45.64 (11.02)
INS (Insulin)	mU/L	7.14 (3.03)
17BES (17 Beta Estradiol)	pg/mL	58.54 (28.92)
LH (Luteinizing Hormone)	mIU/mL	5.68 (3.45)
FSH (Follicle Stimulating Hormone)	mIU/mL	3.89 (1.84)
PROG (Progesteron)	ng/mL	0.76 (0.39)
PRL (Prolactin)	ng/mL	14.53 (9.16)

## Sheet: S2.hormone_pheno_vs_phase
Table S2. Association analysis between hormones or CMD phenotypes with mentrual cycle phase
The results of association analysis based on GAMs (columns B-F) and LMMs (columns I-J). NB: P-values estimated for smooth terms in GAMs are only approximate; very strong effects give the p-values equal to zero, meaning that there is very strong evidence that the effect of visit on protein levels is different from a horizontal line.
Columns: hormone_phenotype - hormone/phenotype name; gam_pval - p-value of the significance of the smooth term of the menstrual phase (numeric); gam_BH_pval - BH-adjusted p-value of the phase number; gam_edf - estimated degrees of freedom of the phase term; gam_edf_round - rounded gam_edf; gam_fval - F statistics of the phase smooth term; n - number of samples used in the model; n_ids - number of…
hormone_phenotype	gam_pval	gam_BH_pval	gam_edf	gam_edf_round	gam_fval	n	n_ids	lmm_pval	lmm_BH_pval
PROG	0	0	2.9247	3	143.287	499	159	5.34986e-65	8.02479e-64
FSH	0	0	2.96153	3	81.806	499	159	3.5452e-41	2.6589e-40
17BES	0	0	2.89399	3	32.7452	499	159	5.68397e-18	2.13149e-17
LH	0	0	2.98165	3	86.1083	499	159	6.52129e-41	3.26064e-40
COL	0	0	1.00054	1	38.8506	499	159	4.16616e-08	1.24985e-07
LDL	2.00434e-06	5.01086e-06	1.74637	2	13.4385	499	159	2.0215e-06	5.05376e-06
ALT	0.00139523	0.00298978	1.00091	1	10.3693	498	159	0.0119226	0.0223549
TRI	0.0016966	0.00318113	1.00444	1	9.982	499	159	0.0112082	0.0223549
HDL	0.026396	0.0439266	2.1736	2	3.28968	499	159	0.018927	0.0283904
HOMA_IR	0.0292844	0.0439266	1.00211	1	4.78299	498	159	0.0226794	0.0309264
INS	0.0628127	0.0856537	2.22107	2	2.80609	499	159	0.0147607	0.0246012
HOMA_B	0.103231	0.129039	2.19095	2	2.56554	498	159	0.0267665	0.0334581
AST	0.193837	0.223658	1.20577	1	1.99216	499	159	0.187243	0.200618
PRL	0.334098	0.357962	2.38412	2	1.23029	499	159	0.0896907	0.103489
GL	0.837226	0.837226	1.00169	1	0.0433829	498	159	0.828715	0.828715

## Sheet: S3.protein_descr
Table S3. Description of proteins measured
The list of proteins measured using 3 Olink panels in our cohort.
Columns: Assay - assay name of the protein (corresponds to its coding gene name); UniProt - UniProt ID of the protein; single_coding_gene - whether protein is encoded by one gene; OlinkID: the Olink ID of the Assay in Olink Explore HT panel; OlinkID_E3072 - Olink ID of the assay in Olink 384 panels; BridgingRecommendation: the method recommended for bridging (NA if no bridging was performed for t…
Assay	UniProt	Ensembl gene id	Gene name	single_coding_gene	OlinkID	OlinkID_E3072	batch	BridgingRecommendation	bridged_successfully	pass_LOD_filter
A1BG	P04217	ENSG00000121410	Alpha-1-B Glycoprotein	TRUE	OID45433	NA	batch_2	NA	TRUE	TRUE
KIR2DL2_KIR2DL3	P43627_P43628	NA, ENSG00000243772	Killer cell immunoglobulin-like receptor 2DL2, killer cell immunoglobulin like receptor, two Ig domains and long cytoplasmic tail 3 [Source:HGNC Symbol;Acc:HGNC:6331]	FALSE	OID43894	NA	batch_2	NA	TRUE	FALSE
ADGRF2	Q8IZF7	ENSG00000164393	Putative adhesion G protein-coupled receptor F2P	TRUE	OID40006	NA	batch_2	NA	TRUE	FALSE
AKAP2	Q9Y2D5	ENSG00000157654	Paralemmin A kinase anchor protein	TRUE	OID43351	NA	batch_2	NA	TRUE	TRUE
AMY1_AMY2	P04746_P0DTE7_P0DTE8_P0DUB6_P19961	ENSG00000243480,ENSG00000237763,ENSG00000174876,ENSG00000187733,ENSG00000240038	Alpha-amylase 2A, 1B, 1C, 1A, 2B	FALSE	OID45304	NA	batch_2	NA	TRUE	TRUE
ANKRD20A12P	Q8NF67	NA	Ankyrin Repeat Domain 20 Family Member A12, Pseudogene	TRUE	OID40796	NA	batch_2	NA	TRUE	FALSE
ANP32C	O43423	ENSG00000248546	Acidic Nuclear Phosphoprotein 32 Family Member C, Pseudogene	TRUE	OID43366	NA	batch_2	NA	TRUE	FALSE
BAP18	Q8IXM2	ENSG00000258315	BPTF Associated Chromatin Complex Component 1	TRUE	OID43407	NA	batch_2	NA	TRUE	FALSE
BARGIN	Q6ZT62	ENSG00000161939	RNASEK-C17orf49 Readthrough	TRUE	OID42173	NA	batch_2	NA	TRUE	FALSE
C12orf40	Q86WS4	ENSG00000180116	Regulator Of DNA Class I Crossover Intermediates 1	TRUE	OID40882	NA	batch_2	NA	TRUE	FALSE
C14orf178	Q8N769	ENSG00000197734	SLIRP Overlapping Transcript 1	TRUE	OID40073	NA	batch_2	NA	TRUE	TRUE
C1orf131	Q8NDD1	ENSG00000143633	40S Small Subunit Processome Assembly Factor 1	TRUE	OID40891	NA	batch_2	NA	TRUE	FALSE
C2orf16	Q68DN1	ENSG00000221843	SPATA31 Subfamily H Member 1	TRUE	OID40895	NA	batch_2	NA	TRUE	FALSE
C2orf73	Q8N5S3	ENSG00000177994	Ciliary Microtubule Inner Protein 6	TRUE	OID40897	NA	batch_2	NA	TRUE	FALSE
C2orf83	Q53S99	ENSG00000042304	Solute Carrier Family 19 Member 4, Pseudogene	TRUE	OID40078	NA	batch_2	NA	TRUE	FALSE
C4orf47	A7E2U8	ENSG00000205129	Cilia And Flagella Associated Protein 96	TRUE	OID40904	NA	batch_2	NA	TRUE	FALSE
C7orf31	Q8N865	ENSG00000153790	Sperm Microtubule Inner Protein 4	TRUE	OID42204	NA	batch_2	NA	TRUE	FALSE
C7orf50	Q9BRJ6	ENSG00000146540	Cholesin	TRUE	OID43436	NA	batch_2	NA	TRUE	FALSE
C9orf131	Q5VYM1	ENSG00000174038	SPATA31 Subfamily G Member 1	TRUE	OID40081	NA	batch_2	NA	TRUE	FALSE
CEFIP	Q711Q0	ENSG00000177354	Chromosome 10 Open Reading Frame 71	TRUE	OID40987	NA	batch_2	NA	TRUE	FALSE
CENPJ	Q9HC77	ENSG00000151849	Centrosome Assembly And Centriole Elongation Protein	TRUE	OID42268	NA	batch_2	NA	TRUE	FALSE
ERVK-19	O71037	NA	Endogenous Retrovirus Group K Member 19, Envelope	TRUE	OID41173	NA	batch_2	NA	TRUE	FALSE
F231L	P0DMU3	ENSG00000182518	VCP Nuclear Cofactor Family Member 2	TRUE	OID40214	NA	batch_2	NA	TRUE	FALSE
FAM104B	Q5XKR9	ENSG00000188163	Ciliary Microtubule Inner Protein 2A	TRUE	OID41182	NA	batch_2	NA	TRUE	FALSE
FAM166A	Q6J272	NA	Ciliary microtubule inner protein 2A	TRUE	OID40219	NA	batch_2	NA	TRUE	FALSE
FAM172A	Q8WUF8	ENSG00000113391	ARB2 Cotranscriptional Regulator A	TRUE	OID43699	NA	batch_2	NA	TRUE	TRUE
GAGE7	O76087	NA	G Antigen 7	TRUE	OID41226	NA	batch_2	NA	TRUE	FALSE
HERVK-113_GA113	P62684	NA	Endogenous retrovirus group K member 113 Gag polyprotein	TRUE	OID42557	NA	batch_2	NA	TRUE	TRUE
HERVK-113_VP113	P63121	NA	Endogenous retrovirus group K member 113 Pro protein	TRUE	OID41289	NA	batch_2	NA	TRUE	FALSE
IMUP	Q9GZP8	ENSG00000167644	Chromosome 19 Open Reading Frame 33	TRUE	OID45161	NA	batch_2	NA	TRUE	TRUE
INS-CPEPTIDE	P01308	NA	Insulin [Cleaved into: Insulin B chain; Insulin A chain]	TRUE	OID44722	NA	batch_2	NA	TRUE	TRUE
KIAA2026	Q5HYC2	ENSG00000183354	Bromodomain Containing 10	TRUE	OID40339	NA	batch_2	NA	TRUE	FALSE
L1RE1	Q9UN81	NA	Leukocyte Immunoglobulin Like Receptor A3	TRUE	OID42686	NA	batch_2	NA	TRUE	FALSE
LEG1	Q6P5S2	ENSG00000184530	Chromosome 6 Open Reading Frame 58	TRUE	OID44745	NA	batch_2	NA	TRUE	TRUE
LILRA3	Q8N6C8	NA	Leukocyte immunoglobulin-like receptor subfamily A member 3	TRUE	OID45177	NA	batch_2	NA	TRUE	TRUE
MENT	Q9BUN1	ENSG00000143443	Chromosome 1 Open Reading Frame 56	TRUE	OID44775	NA	batch_2	NA	TRUE	TRUE
MKRN4P	Q13434	ENSG00000238222	Makorin Ring Finger Protein 4, Pseudogene	TRUE	OID41480	NA	batch_2	NA	TRUE	FALSE
MR1L2	B2RBV5	NA	MORF4 family associated protein 1 like 2	TRUE	OID41514	NA	batch_2	NA	TRUE	FALSE
NT-proBNP	NT-proBNP	ENSG00000120937	NPPB natriuretic peptide B	TRUE	OID44822	OID20125	batch_1+2	QuantileSmoothing	TRUE	TRUE
PALM2	Q8IXS6	NA	Paralemmin 2	TRUE	OID44072	NA	batch_2	NA	TRUE	TRUE
PPP1R32	Q7Z5V6	ENSG00000162148	Stabilizer Of Axonemal Microtubules 4	TRUE	OID40520	NA	batch_2	NA	TRUE	TRUE
PRR25	Q96S07	NA	Proline Rich 25	TRUE	OID40529	NA	batch_2	NA	TRUE	TRUE
SARG	Q9BW04	ENSG00000182795	Chromosome 1 Open Reading Frame 116	TRUE	OID44906	NA	batch_2	NA	TRUE	TRUE
TDGF1	P13385	ENSG00000241186	Cripto, EGF-CFC Family Member	TRUE	OID43168	NA	batch_2	NA	TRUE	TRUE
TEX33	O43247	ENSG00000185264	Ciliary Microtubule Inner Protein 4	TRUE	OID43178	NA	batch_2	NA	TRUE	FALSE
TEX37	Q96LM6	ENSG00000172073	Sperm Microtubule Inner Protein 9	TRUE	OID40656	NA	batch_2	NA	TRUE	FALSE
THEGL	P0DJG4	ENSG00000249693	Sperm Microtubule Associated Protein 2 Like	TRUE	OID43186	NA	batch_2	NA	TRUE	FALSE
TXNRD3NB	Q6F5E7	ENSG00000197763	Thioredoxin Reductase 3	TRUE	OID41980	NA	batch_2	NA	TRUE	FALSE
YB057_YM017	A8MUA0_A8MX80	NA	Putative uncharacterized protein	FALSE	OID41518	NA	batch_2	NA	TRUE	FALSE
YH007	Q8N7P7	NA	Putative uncharacterized protein	TRUE	OID42470	NA	batch_2	NA	TRUE	FALSE
YK038	Q8IYB0	NA	Putative uncharacterized protein	TRUE	OID40440	NA	batch_2	NA	TRUE	FALSE
YO027	Q6ZSR3	NA	Putative uncharacterized protein	TRUE	OID41516	NA	batch_2	NA	TRUE	FALSE
YP010	Q96M66	NA	Putative uncharacterized protein	TRUE	OID40247	NA	batch_2	NA	TRUE	TRUE
YP029	Q6ZRN7	NA	Putative uncharacterized protein	TRUE	OID41517	NA	batch_2	NA	TRUE	FALSE
YU005	A8MT66	NA	Putative uncharacterized protein	TRUE	OID41515	NA	batch_2	NA	TRUE	FALSE
PAXX	Q9BUH6	ENSG00000310560	PAXX non-homologous end joining factor [Source:HGNC Symbol;Acc:HGNC:27849]	TRUE	OID44831	NA	batch_2	NA	TRUE	TRUE
PLEKHA8P1	O95397	ENSG00000293316, ENSG00000134297	pleckstrin homology domain containing A8 pseudogene 1 [Source:HGNC Symbol;Acc:HGNC:30222]	TRUE	OID40508	NA	batch_2	NA	TRUE	FALSE
ANKRD36BP1	Q96IX9	ENSG00000293109, ENSG00000214262	ankyrin repeat domain 36B pseudogene 1 [Source:HGNC Symbol;Acc:HGNC:28169]	TRUE	OID40019	NA	batch_2	NA	TRUE	FALSE
IL9R	Q01113	ENSG00000292373, ENSG00000124334	interleukin 9 receptor [Source:HGNC Symbol;Acc:HGNC:6030]	TRUE	OID41325	NA	batch_2	NA	TRUE	FALSE
CRLF2	Q9HC73	ENSG00000292363, ENSG00000205755	cytokine receptor like factor 2 [Source:HGNC Symbol;Acc:HGNC:14281]	TRUE	OID41055	NA	batch_2	NA	TRUE	TRUE
CSF2RA	P15509	ENSG00000292357, ENSG00000198223	colony stimulating factor 2 receptor subunit alpha [Source:HGNC Symbol;Acc:HGNC:2435]	TRUE	OID43571	NA	batch_2	NA	TRUE	TRUE
SHOX	O15266	ENSG00000292354, ENSG00000185960	SHOX homeobox [Source:HGNC Symbol;Acc:HGNC:10853]	TRUE	OID41796	NA	batch_2	NA	TRUE	FALSE
CD99	P14209	ENSG00000292348, ENSG00000002586	CD99 molecule (Xg blood group) [Source:HGNC Symbol;Acc:HGNC:7082]	TRUE	OID45062	NA	batch_2	NA	TRUE	TRUE
IL3RA	P26951	ENSG00000292332, ENSG00000185291	interleukin 3 receptor subunit alpha [Source:HGNC Symbol;Acc:HGNC:6012]	TRUE	OID42626	OID20461	batch_1+2	MedianCentering	TRUE	FALSE
SOD2	P04179	ENSG00000291237	superoxide dismutase 2 [Source:HGNC Symbol;Acc:HGNC:11180]	TRUE	OID45263	NA	batch_2	NA	TRUE	TRUE
FAM90A10	A6NDY2	ENSG00000285950	family with sequence similarity 90 member A10 [Source:HGNC Symbol;Acc:HGNC:32258]	TRUE	OID41197	NA	batch_2	NA	TRUE	FALSE
C2orf81	A6NN90	ENSG00000284308	chromosome 2 open reading frame 81 [Source:HGNC Symbol;Acc:HGNC:34350]	TRUE	OID40899	NA	batch_2	NA	TRUE	FALSE
IQCJ-SCHIP1	B3KU38	ENSG00000283154	IQCJ-SCHIP1 readthrough [Source:HGNC Symbol;Acc:HGNC:38842]	TRUE	OID41339	NA	batch_2	NA	TRUE	FALSE
HSP90AB4P	Q58FF6	ENSG00000282100	heat shock protein 90 alpha family class B member 4, pseudogene [Source:HGNC Symbol;Acc:HGNC:32538]	TRUE	OID41306	NA	batch_2	NA	TRUE	FALSE
PAGR1	Q9BTK6	ENSG00000280789	PAXIP1 associated glutamate rich protein 1 [Source:HGNC Symbol;Acc:HGNC:28707]	TRUE	OID44070	NA	batch_2	NA	TRUE	TRUE
LINC02906	E5RJ46	ENSG00000279847	long intergenic non-protein coding RNA 2906 [Source:HGNC Symbol;Acc:HGNC:42974]	TRUE	OID41415	NA	batch_2	NA	TRUE	FALSE
IQCA1L	A6NCM1	ENSG00000278685	IQ motif containing with AAA domain 1 like [Source:HGNC Symbol;Acc:HGNC:22831]	TRUE	OID40314	NA	batch_2	NA	TRUE	FALSE
MRM1	Q6IN84	ENSG00000278619	mitochondrial rRNA methyltransferase 1 [Source:HGNC Symbol;Acc:HGNC:26202]	TRUE	OID40423	NA	batch_2	NA	TRUE	TRUE
SSTR3	P32745	ENSG00000278195	somatostatin receptor 3 [Source:HGNC Symbol;Acc:HGNC:11332]	TRUE	OID41871	NA	batch_2	NA	TRUE	TRUE
CCL3	P10147	ENSG00000277632	C-C motif chemokine ligand 3 [Source:HGNC Symbol;Acc:HGNC:10627]	TRUE	OID43473	OID20610	batch_1+2	QuantileSmoothing	TRUE	TRUE
NEFL	P07196	ENSG00000277586	neurofilament light chain [Source:HGNC Symbol;Acc:HGNC:7739]	TRUE	OID42822	NA	batch_2	NA	TRUE	FALSE
GPIHBP1	Q8IV16	ENSG00000277494	glycosylphosphatidylinositol anchored high density lipoprotein binding protein 1 [Source:HGNC Symbol;Acc:HGNC:24945]	TRUE	OID43777	NA	batch_2	NA	TRUE	TRUE
SRCIN1	Q9C0H9	ENSG00000277363	SRC kinase signaling inhibitor 1 [Source:HGNC Symbol;Acc:HGNC:29506]	TRUE	OID43130	NA	batch_2	NA	TRUE	FALSE
CCL14	Q16627	ENSG00000276409	C-C motif chemokine ligand 14 [Source:HGNC Symbol;Acc:HGNC:10612]	TRUE	OID45324	OID20401	batch_1+2	QuantileSmoothing	TRUE	TRUE
PRSS2	P07478	ENSG00000275896	serine protease 2 [Source:HGNC Symbol;Acc:HGNC:9483]	TRUE	OID45402	OID20364	batch_1+2	MedianCentering	TRUE	TRUE
TUBGCP5	Q96RT8	ENSG00000275835	tubulin gamma complex component 5 [Source:HGNC Symbol;Acc:HGNC:18600]	TRUE	OID40688	NA	batch_2	NA	TRUE	FALSE
CCL15	Q16663	ENSG00000275718	C-C motif chemokine ligand 15 [Source:HGNC Symbol;Acc:HGNC:10613]	TRUE	OID45052	OID20328	batch_1+2	MedianCentering	TRUE	TRUE
CCL18	P55774	ENSG00000275385	C-C motif chemokine ligand 18 [Source:HGNC Symbol;Acc:HGNC:10616]	TRUE	OID45325	OID20395	batch_1+2	QuantileSmoothing	TRUE	TRUE
CCL4	P13236	ENSG00000275302	C-C motif chemokine ligand 4 [Source:HGNC Symbol;Acc:HGNC:10630]	TRUE	OID44504	OID20695	batch_1+2	MedianCentering	TRUE	TRUE
CCL16	O15467	ENSG00000275152	C-C motif chemokine ligand 16 [Source:HGNC Symbol;Acc:HGNC:10614]	TRUE	OID45053	OID20334	batch_1+2	MedianCentering	TRUE	TRUE
CCL23	P55773	ENSG00000274736	C-C motif chemokine ligand 23 [Source:HGNC Symbol;Acc:HGNC:10622]	TRUE	OID44501	OID20693	batch_1+2	QuantileSmoothing	TRUE	TRUE
CEACAM20	Q6UY09	ENSG00000273777	CEA cell adhesion molecule 20 [Source:HGNC Symbol;Acc:HGNC:24879]	TRUE	OID42258	NA	batch_2	NA	TRUE	FALSE
LHX1	P48742	ENSG00000273706	LIM homeobox 1 [Source:HGNC Symbol;Acc:HGNC:6593]	TRUE	OID41412	NA	batch_2	NA	TRUE	FALSE
GRIN2B	Q13224	ENSG00000273079	glutamate ionotropic receptor NMDA type subunit 2B [Source:HGNC Symbol;Acc:HGNC:4586]	TRUE	OID42534	NA	batch_2	NA	TRUE	FALSE
DCP1A	Q9NPI6	ENSG00000272886	decapping mRNA 1A [Source:HGNC Symbol;Acc:HGNC:18714]	TRUE	OID41082	NA	batch_2	NA	TRUE	TRUE
DOC2B	Q14184	ENSG00000272636	double C2 domain beta [Source:HGNC Symbol;Acc:HGNC:2986]	TRUE	OID42384	NA	batch_2	NA	TRUE	FALSE
IFNL4	K9M1U5	ENSG00000272395	interferon lambda 4 (gene/pseudogene) [Source:HGNC Symbol;Acc:HGNC:44480]	TRUE	OID40303	NA	batch_2	NA	TRUE	TRUE
MILR1	Q7Z6M3	ENSG00000271605	mast cell immunoglobulin like receptor 1 [Source:HGNC Symbol;Acc:HGNC:27570]	TRUE	OID42758	OID20482	batch_1+2	QuantileSmoothing	TRUE	TRUE
CCL5	P13501	ENSG00000271503	C-C motif chemokine ligand 5 [Source:HGNC Symbol;Acc:HGNC:10632]	TRUE	OID45326	OID20412	batch_1+2	MedianCentering	TRUE	TRUE
C17orf50	Q8WW18	ENSG00000270806	chromosome 17 open reading frame 50 [Source:HGNC Symbol;Acc:HGNC:29581]	TRUE	OID40888	NA	batch_2	NA	TRUE	FALSE
ERVV-1	B6SEH8	ENSG00000269526	endogenous retrovirus group V member 1, envelope [Source:HGNC Symbol;Acc:HGNC:26501]	TRUE	OID42427	NA	batch_2	NA	TRUE	FALSE
DMRTC1	Q5HYR2	ENSG00000269502	DMRT like family C1 [Source:HGNC Symbol;Acc:HGNC:13910]	TRUE	OID40162	NA	batch_2	NA	TRUE	FALSE
IKBKG	Q9Y6K9	ENSG00000269335	inhibitor of nuclear factor kappa B kinase regulatory subunit gamma [Source:HGNC Symbol;Acc:HGNC:5961]	TRUE	OID43841	OID20544	batch_1+2	MedianCentering	TRUE	TRUE
MAGIX	Q9H6Y5	ENSG00000269313	MAGI family member, X-linked [Source:HGNC Symbol;Acc:HGNC:30006]	TRUE	OID41445	NA	batch_2	NA	TRUE	FALSE
SPANXN2	Q5MJ10	ENSG00000268988	SPANX family member N2 [Source:HGNC Symbol;Acc:HGNC:33175]	TRUE	OID40614	NA	batch_2	NA	TRUE	FALSE
CT45A1	Q5HYN5	ENSG00000268940	cancer/testis antigen family 45 member A1 [Source:HGNC Symbol;Acc:HGNC:33267]	TRUE	OID40136	NA	batch_2	NA	TRUE	FALSE
CTAG1A_CTAG1B	P78358	ENSG00000268651, ENSG00000184033	cancer/testis antigen 1A [Source:HGNC Symbol;Acc:HGNC:24198], cancer/testis antigen 1B [Source:HGNC Symbol;Acc:HGNC:2491]	TRUE	OID42332	NA	batch_2	NA	TRUE	FALSE
TEX13A	Q9BXU3	ENSG00000268629	testis expressed 13A [Source:HGNC Symbol;Acc:HGNC:11735]	TRUE	OID41929	NA	batch_2	NA	TRUE	TRUE
ARL14EPL	P0DKL9	ENSG00000268223	ARF like GTPase 14 effector protein like [Source:HGNC Symbol;Acc:HGNC:44201]	TRUE	OID40823	NA	batch_2	NA	TRUE	TRUE
FDX2	Q6P4F2	ENSG00000267673	ferredoxin 2 [Source:HGNC Symbol;Acc:HGNC:30546]	TRUE	OID42453	NA	batch_2	NA	TRUE	FALSE
UPK3BL1	B0FP48	ENSG00000267368	uroplakin 3B like 1 [Source:HGNC Symbol;Acc:HGNC:37278]	TRUE	OID43273	NA	batch_2	NA	TRUE	FALSE
PTGES3L	E9PB15	ENSG00000267060	prostaglandin E synthase 3 like [Source:HGNC Symbol;Acc:HGNC:43943]	TRUE	OID42964	NA	batch_2	NA	TRUE	FALSE
AARSD1	Q9BTE6	ENSG00000266967	alanyl-tRNA synthetase domain containing 1 [Source:HGNC Symbol;Acc:HGNC:28417]	TRUE	OID43312	NA	batch_2	NA	TRUE	FALSE
PNLIPRP2	P54317	ENSG00000266200	pancreatic lipase related protein 2 (gene/pseudogene) [Source:HGNC Symbol;Acc:HGNC:9157]	TRUE	OID44859	OID20775	batch_1+2	MedianCentering	TRUE	TRUE
RASSF5	Q8WWW0	ENSG00000266094	Ras association domain family member 5 [Source:HGNC Symbol;Acc:HGNC:17609]	TRUE	OID41702	NA	batch_2	NA	TRUE	TRUE
SRGAP2	O75044	ENSG00000266028	SLIT-ROBO Rho GTPase activating protein 2 [Source:HGNC Symbol;Acc:HGNC:19751]	TRUE	OID43131	NA	batch_2	NA	TRUE	FALSE
OTUD7B	Q6GQQ9	ENSG00000264522	OTU deubiquitinase 7B [Source:HGNC Symbol;Acc:HGNC:16683]	TRUE	OID44064	NA	batch_2	NA	TRUE	TRUE
MYH4	Q9Y623	ENSG00000264424	myosin heavy chain 4 [Source:HGNC Symbol;Acc:HGNC:7574]	TRUE	OID42790	NA	batch_2	NA	TRUE	FALSE
RHEX	Q6ZWK4	ENSG00000263961	regulator of hemoglobinization and erythroid cell expansion [Source:HGNC Symbol;Acc:HGNC:25341]	TRUE	OID41720	NA	batch_2	NA	TRUE	FALSE
NBPF11	Q86T75	ENSG00000263956	NBPF member 11 [Source:HGNC Symbol;Acc:HGNC:31993]	TRUE	OID41525	NA	batch_2	NA	TRUE	FALSE
GDF2	Q9UK05	ENSG00000263761	growth differentiation factor 2 [Source:HGNC Symbol;Acc:HGNC:4217]	TRUE	OID44675	OID20202	batch_1+2	MedianCentering	TRUE	TRUE
MSMB	P08118	ENSG00000263639	microseminoprotein beta [Source:HGNC Symbol;Acc:HGNC:7372]	TRUE	OID45190	OID20275	batch_1+2	MedianCentering	TRUE	TRUE
OVCA2	Q8WZ82	ENSG00000262664	OVCA2 serine hydrolase domain containing [Source:HGNC Symbol;Acc:HGNC:24203]	TRUE	OID42871	NA	batch_2	NA	TRUE	TRUE
SPON1	Q9HCB6	ENSG00000262655	spondin 1 [Source:HGNC Symbol;Acc:HGNC:11252]	TRUE	OID44956	OID20759	batch_1+2	QuantileSmoothing	TRUE	TRUE
CCER2	I3L3R5	ENSG00000262484	coiled-coil glutamate rich protein 2 [Source:HGNC Symbol;Acc:HGNC:44662]	TRUE	OID43466	NA	batch_2	NA	TRUE	TRUE
MMP12	P39900	ENSG00000262406	matrix metallopeptidase 12 [Source:HGNC Symbol;Acc:HGNC:7158]	TRUE	OID43980	NA	batch_2	NA	TRUE	TRUE
PCDHGB3	Q9Y5G1	ENSG00000262209	protocadherin gamma subfamily B, 3 [Source:HGNC Symbol;Acc:HGNC:8710]	TRUE	OID42885	NA	batch_2	NA	TRUE	FALSE
MIA	Q16674	ENSG00000261857	MIA SH3 domain containing [Source:HGNC Symbol;Acc:HGNC:7076]	TRUE	OID44782	NA	batch_2	NA	TRUE	TRUE
TPBGL	P0DKB5	ENSG00000261594	trophoblast glycoprotein like [Source:HGNC Symbol;Acc:HGNC:44159]	TRUE	OID43221	NA	batch_2	NA	TRUE	TRUE
TUBB8	Q3ZCM7	ENSG00000261456	tubulin beta 8 class VIII [Source:HGNC Symbol;Acc:HGNC:20773]	TRUE	OID43255	NA	batch_2	NA	TRUE	FALSE
PECAM1	P16284	ENSG00000261371	platelet and endothelial cell adhesion molecule 1 [Source:HGNC Symbol;Acc:HGNC:8823]	TRUE	OID45218	NA	batch_2	NA	TRUE	TRUE
ANKRD26P1	Q6NSI1	ENSG00000261239	ankyrin repeat domain 26 pseudogene 1 [Source:HGNC Symbol;Acc:HGNC:32955]	TRUE	OID40015	NA	batch_2	NA	TRUE	FALSE
EPPK1	P58107	ENSG00000261150	epiplakin 1 [Source:HGNC Symbol;Acc:HGNC:15577]	TRUE	OID43685	NA	batch_2	NA	TRUE	FALSE
ANKRD20A1	Q5TYW2	ENSG00000260691	ankyrin repeat domain 20 family member A1 [Source:HGNC Symbol;Acc:HGNC:23665]	TRUE	OID40014	NA	batch_2	NA	TRUE	FALSE
MRC1	P22897	ENSG00000260314	mannose receptor C-type 1 [Source:HGNC Symbol;Acc:HGNC:7228]	TRUE	OID45385	NA	batch_2	NA	TRUE	TRUE
LYPD8	Q6UX82	ENSG00000259823	LY6/PLAUR domain containing 8 [Source:HGNC Symbol;Acc:HGNC:44208]	TRUE	OID42719	NA	batch_2	NA	TRUE	FALSE
MRPL46	Q9H2W6	ENSG00000259494	mitochondrial ribosomal protein L46 [Source:HGNC Symbol;Acc:HGNC:1192]	TRUE	OID42774	NA	batch_2	NA	TRUE	FALSE
THTPA	Q9BU02	ENSG00000259431	thiamine triphosphatase [Source:HGNC Symbol;Acc:HGNC:18987]	TRUE	OID44323	NA	batch_2	NA	TRUE	TRUE
GH1	P01241	ENSG00000259384	growth hormone 1 [Source:HGNC Symbol;Acc:HGNC:4261]	TRUE	OID44679	OID20220	batch_1+2	QuantileSmoothing	TRUE	TRUE
TUBB3	Q13509	ENSG00000258947	tubulin beta 3 class III [Source:HGNC Symbol;Acc:HGNC:20772]	TRUE	OID43254	NA	batch_2	NA	TRUE	FALSE
RNASE4	P34096	ENSG00000258818	ribonuclease A family member 4 [Source:HGNC Symbol;Acc:HGNC:10047]	TRUE	OID45407	NA	batch_2	NA	TRUE	TRUE
SPESP1	Q6UW49	ENSG00000258484	sperm equatorial segment protein 1 [Source:HGNC Symbol;Acc:HGNC:15570]	TRUE	OID44952	NA	batch_2	NA	TRUE	TRUE
RTEL1	Q9NZ71	ENSG00000258366	regulator of telomere elongation helicase 1 [Source:HGNC Symbol;Acc:HGNC:15888]	TRUE	OID40582	NA	batch_2	NA	TRUE	FALSE
CLEC5A	Q9NY25	ENSG00000258227	C-type lectin domain containing 5A [Source:HGNC Symbol;Acc:HGNC:2054]	TRUE	OID44546	OID20165	batch_1+2	QuantileSmoothing	TRUE	TRUE
MAP1LC3B2	A6NCE7	ENSG00000258102	microtubule associated protein 1 light chain 3 beta 2 [Source:HGNC Symbol;Acc:HGNC:34390]	TRUE	OID42733	NA	batch_2	NA	TRUE	FALSE
CNPY2	Q9Y2B0	ENSG00000257727	canopy FGF signaling regulator 2 [Source:HGNC Symbol;Acc:HGNC:13529]	TRUE	OID42307	OID20069	batch_1+2	QuantileSmoothing	TRUE	TRUE
ZBED6	P86452	ENSG00000257315	zinc finger BED-type containing 6 [Source:HGNC Symbol;Acc:HGNC:33273]	TRUE	OID43293	NA	batch_2	NA	TRUE	FALSE
GATC	O43716	ENSG00000257218	glutamyl-tRNA amidotransferase subunit C [Source:HGNC Symbol;Acc:HGNC:25068]	TRUE	OID41237	NA	batch_2	NA	TRUE	FALSE
ZNF350	Q9GZX5	ENSG00000256683	zinc finger protein 350 [Source:HGNC Symbol;Acc:HGNC:16656]	TRUE	OID40744	NA	batch_2	NA	TRUE	FALSE
HMBS	P08397	ENSG00000256269	hydroxymethylbilane synthase [Source:HGNC Symbol;Acc:HGNC:4982]	TRUE	OID43807	NA	batch_2	NA	TRUE	TRUE
DNAAF4	Q8WXU2	ENSG00000256061	dynein axonemal assembly factor 4 [Source:HGNC Symbol;Acc:HGNC:21493]	TRUE	OID40164	NA	batch_2	NA	TRUE	FALSE
CTSO	P43234	ENSG00000256043	cathepsin O [Source:HGNC Symbol;Acc:HGNC:2542]	TRUE	OID43580	OID20660	batch_1+2	MedianCentering	TRUE	TRUE
RAB44	Q7Z6P3	ENSG00000255587	RAB44, member RAS oncogene family [Source:HGNC Symbol;Acc:HGNC:21068]	TRUE	OID42977	NA	batch_2	NA	TRUE	TRUE
ZNF252P-AS1	Q0IIN9	ENSG00000255559	ZNF252P antisense RNA 1 [Source:HGNC Symbol;Acc:HGNC:27821]	TRUE	OID40741	NA	batch_2	NA	TRUE	TRUE
PRR23D2	P0DMB1	ENSG00000255378	proline rich 23 domain containing 2 [Source:HGNC Symbol;Acc:HGNC:49396]	TRUE	OID40528	NA	batch_2	NA	TRUE	FALSE
EID1	Q9Y6B2	ENSG00000255302	EP300 interacting inhibitor of differentiation 1 [Source:HGNC Symbol;Acc:HGNC:1191]	TRUE	OID40189	NA	batch_2	NA	TRUE	FALSE
PDXDC2P	Q6P474	ENSG00000255185	pyridoxal dependent decarboxylase domain containing 2, pseudogene [Source:HGNC Symbol;Acc:HGNC:27559]	TRUE	OID41604	NA	batch_2	NA	TRUE	FALSE
HTD2	P86397	ENSG00000255154	hydroxyacyl-thioester dehydratase type 2 [Source:HGNC Symbol;Acc:HGNC:53111]	TRUE	OID43826	NA	batch_2	NA	TRUE	TRUE
UBTFL1	P0CB47	ENSG00000255009	upstream binding transcription factor like 1 [Source:HGNC Symbol;Acc:HGNC:14533]	TRUE	OID43265	NA	batch_2	NA	TRUE	FALSE
BRK1	Q8WUW1	ENSG00000254999	BRICK1 subunit of SCAR/WAVE actin nucleating complex [Source:HGNC Symbol;Acc:HGNC:23057]	TRUE	OID43425	NA	batch_2	NA	TRUE	TRUE
NPIPA2	E9PIF3	ENSG00000254852	nuclear pore complex interacting protein family member A2 [Source:HGNC Symbol;Acc:HGNC:41979]	TRUE	OID41554	NA	batch_2	NA	TRUE	TRUE
PABPC4L	P0CB38	ENSG00000254535	poly(A) binding protein cytoplasmic 4 like [Source:HGNC Symbol;Acc:HGNC:31955]	TRUE	OID41580	NA	batch_2	NA	TRUE	FALSE
LYN	P07948	ENSG00000254087	LYN proto-oncogene, Src family tyrosine kinase [Source:HGNC Symbol;Acc:HGNC:6735]	TRUE	OID43948	NA	batch_2	NA	TRUE	FALSE
CLDN23	Q96B33	ENSG00000253958	claudin 23 [Source:HGNC Symbol;Acc:HGNC:17591]	TRUE	OID41024	NA	batch_2	NA	TRUE	FALSE
EIF5AL1	Q6IS14	ENSG00000253626	eukaryotic translation initiation factor 5A like 1 [Source:HGNC Symbol;Acc:HGNC:17419]	TRUE	OID40193	NA	batch_2	NA	TRUE	FALSE
NACA2	Q9H009	ENSG00000253506	nascent polypeptide associated complex subunit alpha 2 [Source:HGNC Symbol;Acc:HGNC:23290]	TRUE	OID40442	NA	batch_2	NA	TRUE	FALSE
SELENOP	P49908	ENSG00000250722	selenoprotein P [Source:HGNC Symbol;Acc:HGNC:10751]	TRUE	OID45488	NA	batch_2	NA	TRUE	TRUE
CHCHD10	Q8WYQ3	ENSG00000250479	coiled-coil-helix-coiled-coil-helix domain containing 10 [Source:HGNC Symbol;Acc:HGNC:15559]	TRUE	OID43524	NA	batch_2	NA	TRUE	TRUE
KIAA1210	Q9ULL0	ENSG00000250423	KIAA1210 [Source:HGNC Symbol;Acc:HGNC:29218]	TRUE	OID41371	NA	batch_2	NA	TRUE	FALSE
TRMT9B	Q9P272	ENSG00000250305	tRNA methyltransferase 9B (putative) [Source:HGNC Symbol;Acc:HGNC:26725]	TRUE	OID41957	NA	batch_2	NA	TRUE	FALSE
PTTG2	Q9NZH5	ENSG00000250254	pituitary tumor-transforming 2 [Source:HGNC Symbol;Acc:HGNC:9691]	TRUE	OID44154	NA	batch_2	NA	TRUE	TRUE
GBA3	Q9H227	ENSG00000249948	glucosylceramidase beta 3 (gene/pseudogene) [Source:HGNC Symbol;Acc:HGNC:19069]	TRUE	OID41238	NA	batch_2	NA	TRUE	FALSE
PDCD6	O75340	ENSG00000249915	programmed cell death 6 [Source:HGNC Symbol;Acc:HGNC:8765]	TRUE	OID44837	OID20163	batch_1+2	QuantileSmoothing	TRUE	TRUE
ECSCR	Q19T08	ENSG00000249751	endothelial cell surface expressed chemotaxis and apoptosis regulator [Source:HGNC Symbol;Acc:HGNC:35454]	TRUE	OID42394	NA	batch_2	NA	TRUE	FALSE
SPATS1	Q496A3	ENSG00000249481	spermatogenesis associated serine rich 1 [Source:HGNC Symbol;Acc:HGNC:22957]	TRUE	OID41853	NA	batch_2	NA	TRUE	FALSE
C4orf54	D6RIA3	ENSG00000248713	chromosome 4 open reading frame 54 [Source:HGNC Symbol;Acc:HGNC:27741]	TRUE	OID40905	NA	batch_2	NA	TRUE	FALSE
TARM1	B6A8C7	ENSG00000248385	T cell-interacting, activating receptor on myeloid cells 1 [Source:HGNC Symbol;Acc:HGNC:37250]	TRUE	OID43160	NA	batch_2	NA	TRUE	FALSE
INSL3	P51460	ENSG00000248099	insulin like 3 [Source:HGNC Symbol;Acc:HGNC:6086]	TRUE	OID43864	NA	batch_2	NA	TRUE	FALSE
TWF2	Q6IBS0	ENSG00000247596	twinfilin actin binding protein 2 [Source:HGNC Symbol;Acc:HGNC:9621]	TRUE	OID45291	NA	batch_2	NA	TRUE	TRUE
COL25A1-DT	Q6ZST2	ENSG00000246774	COL25A1 divergent transcript [Source:HGNC Symbol;Acc:HGNC:32963]	TRUE	OID41045	NA	batch_2	NA	TRUE	FALSE
CEBPA	P49715	ENSG00000245848	CCAAT enhancer binding protein alpha [Source:HGNC Symbol;Acc:HGNC:1833]	TRUE	OID42261	NA	batch_2	NA	TRUE	FALSE
N4BP2L2	Q92802	ENSG00000244754	NEDD4 binding protein 2 like 2 [Source:HGNC Symbol;Acc:HGNC:26916]	TRUE	OID41520	NA	batch_2	NA	TRUE	FALSE
CRYBB2	P43320	ENSG00000244752	crystallin beta B2 [Source:HGNC Symbol;Acc:HGNC:2398]	TRUE	OID43567	NA	batch_2	NA	TRUE	TRUE
CCDC13	Q8IYE1	ENSG00000244607	coiled-coil domain containing 13 [Source:HGNC Symbol;Acc:HGNC:26358]	TRUE	OID40935	NA	batch_2	NA	TRUE	FALSE
SCARF2	Q96GP6	ENSG00000244486	scavenger receptor class F member 2 [Source:HGNC Symbol;Acc:HGNC:19869]	TRUE	OID44908	NA	batch_2	NA	TRUE	TRUE
LILRA6	Q6PI73	ENSG00000244482	leukocyte immunoglobulin like receptor A6 [Source:HGNC Symbol;Acc:HGNC:15495]	TRUE	OID44755	NA	batch_2	NA	TRUE	FALSE
ACY1	Q03154	ENSG00000243989	aminoacylase 1 [Source:HGNC Symbol;Acc:HGNC:177]	TRUE	OID44437	OID20137	batch_1+2	MedianCentering	TRUE	TRUE
GSTA1	P08263	ENSG00000243955	glutathione S-transferase alpha 1 [Source:HGNC Symbol;Acc:HGNC:4626]	TRUE	OID44696	OID20166	batch_1+2	MedianCentering	TRUE	TRUE
CFB	P00751	ENSG00000243649	complement factor B [Source:HGNC Symbol;Acc:HGNC:1037]	TRUE	OID45451	NA	batch_2	NA	TRUE	TRUE
IL10RB	Q08334	ENSG00000243646	interleukin 10 receptor subunit beta [Source:HGNC Symbol;Acc:HGNC:5965]	TRUE	OID44714	OID20696	batch_1+2	QuantileSmoothing	TRUE	TRUE
TNFRSF6B	O95407	ENSG00000243509	TNF receptor superfamily member 6b [Source:HGNC Symbol;Acc:HGNC:11921]	TRUE	OID44343	NA	batch_2	NA	TRUE	TRUE
NAA80	Q93015	ENSG00000243477	N-alpha-acetyltransferase 80, NatH catalytic subunit [Source:HGNC Symbol;Acc:HGNC:30252]	TRUE	OID42804	NA	batch_2	NA	TRUE	TRUE
EFNA4	P52798	ENSG00000243364	ephrin A4 [Source:HGNC Symbol;Acc:HGNC:3224]	TRUE	OID43658	NA	batch_2	NA	TRUE	TRUE
STON1	Q9Y6Q2	ENSG00000243244	stonin 1 [Source:HGNC Symbol;Acc:HGNC:17003]	TRUE	OID40637	NA	batch_2	NA	TRUE	FALSE
MICAL3	Q7RTP6	ENSG00000243156	microtubule associated monooxygenase, calponin and LIM domain containing 3 [Source:HGNC Symbol;Acc:HGNC:24694]	TRUE	OID41475	NA	batch_2	NA	TRUE	FALSE
CCDC169	A6NNP5	ENSG00000242715	coiled-coil domain containing 169 [Source:HGNC Symbol;Acc:HGNC:34361]	TRUE	OID40944	NA	batch_2	NA	TRUE	FALSE
CNTF	P26441	ENSG00000242689	ciliary neurotrophic factor [Source:HGNC Symbol;Acc:HGNC:2169]	TRUE	OID42309	NA	batch_2	NA	TRUE	FALSE
ARPIN	Q7Z6K5	ENSG00000242498	actin related protein 2/3 complex inhibitor [Source:HGNC Symbol;Acc:HGNC:28782]	TRUE	OID40825	NA	batch_2	NA	TRUE	FALSE
BGLAP	P02818	ENSG00000242252	bone gamma-carboxyglutamate protein [Source:HGNC Symbol;Acc:HGNC:1043]	TRUE	OID45041	NA	batch_2	NA	TRUE	TRUE
ARFGAP3	Q9NP61	ENSG00000242247	ARF GTPase activating protein 3 [Source:HGNC Symbol;Acc:HGNC:661]	TRUE	OID40808	NA	batch_2	NA	TRUE	FALSE
KIR3DL3	Q8N743	ENSG00000242019	killer cell immunoglobulin like receptor, three Ig domains and long cytoplasmic tail 3 [Source:HGNC Symbol;Acc:HGNC:16312]	TRUE	OID41388	NA	batch_2	NA	TRUE	FALSE
C8orf58	Q8NAV2	ENSG00000241852	chromosome 8 open reading frame 58 [Source:HGNC Symbol;Acc:HGNC:32233]	TRUE	OID40914	NA	batch_2	NA	TRUE	TRUE
ATP5PO	P48047	ENSG00000241837	ATP synthase peripheral stalk subunit OSCP [Source:HGNC Symbol;Acc:HGNC:850]	TRUE	OID42161	NA	batch_2	NA	TRUE	FALSE
CD302	Q8IX05	ENSG00000241399	CD302 molecule [Source:HGNC Symbol;Acc:HGNC:30843]	TRUE	OID43490	NA	batch_2	NA	TRUE	TRUE
YAE1	Q9NRH1	ENSG00000241127	YAE1 maturation factor of ABCE1 [Source:HGNC Symbol;Acc:HGNC:24857]	TRUE	OID40721	NA	batch_2	NA	TRUE	FALSE
MIF	P14174	ENSG00000240972	macrophage migration inhibitory factor [Source:HGNC Symbol;Acc:HGNC:7097]	TRUE	OID45186	NA	batch_2	NA	TRUE	TRUE
PNMA2	Q9UL42	ENSG00000240694	PNMA family member 2 [Source:HGNC Symbol;Acc:HGNC:9159]	TRUE	OID42923	NA	batch_2	NA	TRUE	FALSE
C1QTNF9	P0C862	ENSG00000240654	C1q and TNF related 9 [Source:HGNC Symbol;Acc:HGNC:28732]	TRUE	OID44486	NA	batch_2	NA	TRUE	TRUE
AQP1	P29972	ENSG00000240583	aquaporin 1 (Colton blood group) [Source:HGNC Symbol;Acc:HGNC:633]	TRUE	OID40027	NA	batch_2	NA	TRUE	FALSE
L1TD1	Q5T7N2	ENSG00000240563	LINE1 type transposase domain containing 1 [Source:HGNC Symbol;Acc:HGNC:25595]	TRUE	OID41401	NA	batch_2	NA	TRUE	FALSE
TNFRSF13B	O14836	ENSG00000240505	TNF receptor superfamily member 13B [Source:HGNC Symbol;Acc:HGNC:18153]	TRUE	OID44988	OID20702	batch_1+2	MedianCentering	TRUE	TRUE
KIR3DL2	P43630	ENSG00000240403	killer cell immunoglobulin like receptor, three Ig domains and long cytoplasmic tail 2 [Source:HGNC Symbol;Acc:HGNC:6339]	TRUE	OID42673	NA	batch_2	NA	TRUE	FALSE
NCOR1P1	Q9H4R4	ENSG00000240108	NCOR1 pseudogene 1 [Source:HGNC Symbol;Acc:HGNC:16724]	TRUE	OID40448	NA	batch_2	NA	TRUE	FALSE
TEX35	Q5T0J7	ENSG00000240021	testis expressed 35 [Source:HGNC Symbol;Acc:HGNC:25366]	TRUE	OID43179	NA	batch_2	NA	TRUE	TRUE
LILRA2	Q8N149	ENSG00000239998	leukocyte immunoglobulin like receptor A2 [Source:HGNC Symbol;Acc:HGNC:6603]	TRUE	OID45176	NA	batch_2	NA	TRUE	TRUE
LILRA4	P59901	ENSG00000239961	leukocyte immunoglobulin like receptor A4 [Source:HGNC Symbol;Acc:HGNC:15503]	TRUE	OID42696	NA	batch_2	NA	TRUE	FALSE
ADSL	P30566	ENSG00000239900	adenylosuccinate lyase [Source:HGNC Symbol;Acc:HGNC:291]	TRUE	OID43340	NA	batch_2	NA	TRUE	TRUE
TNFSF12	O43508	ENSG00000239697	TNF superfamily member 12 [Source:HGNC Symbol;Acc:HGNC:11927]	TRUE	OID44347	OID20624	batch_1+2	QuantileSmoothing	TRUE	TRUE
NME1	P15531	ENSG00000239672	NME/NM23 nucleoside diphosphate kinase 1 [Source:HGNC Symbol;Acc:HGNC:7849]	TRUE	OID42839	NA	batch_2	NA	TRUE	FALSE
KLHL41	O60662	ENSG00000239474	kelch like family member 41 [Source:HGNC Symbol;Acc:HGNC:16905]	TRUE	OID42677	NA	batch_2	NA	TRUE	FALSE
ASB14	A6NK59	ENSG00000239388	ankyrin repeat and SOCS box containing 14 [Source:HGNC Symbol;Acc:HGNC:19766]	TRUE	OID40827	NA	batch_2	NA	TRUE	FALSE
TXNDC5	Q8NBS9	ENSG00000239264	thioredoxin domain containing 5 [Source:HGNC Symbol;Acc:HGNC:21073]	TRUE	OID45003	NA	batch_2	NA	TRUE	TRUE
GOLGA2P5	Q9HBQ8	ENSG00000238105	GOLGA2 pseudogene 5 [Source:HGNC Symbol;Acc:HGNC:25315]	TRUE	OID41253	NA	batch_2	NA	TRUE	FALSE
LRRC37A2	A6NM11	ENSG00000238083	leucine rich repeat containing 37 member A2 [Source:HGNC Symbol;Acc:HGNC:32404]	TRUE	OID43937	NA	batch_2	NA	TRUE	TRUE
KIFC1	Q9BW19	ENSG00000237649	kinesin family member C1 [Source:HGNC Symbol;Acc:HGNC:6389]	TRUE	OID42669	NA	batch_2	NA	TRUE	TRUE
RGL2	O15211	ENSG00000237441	ral guanine nucleotide dissociation stimulator like 2 [Source:HGNC Symbol;Acc:HGNC:9769]	TRUE	OID43010	NA	batch_2	NA	TRUE	FALSE
ARHGEF38	Q9NXL2	ENSG00000236699	Rho guanine nucleotide exchange factor 38 [Source:HGNC Symbol;Acc:HGNC:25968]	TRUE	OID40821	NA	batch_2	NA	TRUE	TRUE
ZBED5	Q49AG3	ENSG00000236287	zinc finger BED-type containing 5 [Source:HGNC Symbol;Acc:HGNC:30803]	TRUE	OID40722	NA	batch_2	NA	TRUE	FALSE
CLEC2L	P0C7M8	ENSG00000236279	C-type lectin domain family 2 member L [Source:HGNC Symbol;Acc:HGNC:21969]	TRUE	OID42296	NA	batch_2	NA	TRUE	FALSE
ZNF815P	A8K554	ENSG00000235944	zinc finger protein 815, pseudogene [Source:HGNC Symbol;Acc:HGNC:22029]	TRUE	OID40746	NA	batch_2	NA	TRUE	FALSE
NEXN-AS1	Q8NBZ9	ENSG00000235927	NEXN antisense RNA 1 [Source:HGNC Symbol;Acc:HGNC:31983]	TRUE	OID41542	NA	batch_2	NA	TRUE	FALSE
GSN-AS1	Q9NRJ2	ENSG00000235865	GSN antisense RNA 1 [Source:HGNC Symbol;Acc:HGNC:23372]	TRUE	OID41269	NA	batch_2	NA	TRUE	FALSE
MFRP	Q9BY79	ENSG00000235718	membrane frizzled-related protein [Source:HGNC Symbol;Acc:HGNC:18121]	TRUE	OID41471	NA	batch_2	NA	TRUE	FALSE
ANKRD34C	P0C6C1	ENSG00000235711	ankyrin repeat domain 34C [Source:HGNC Symbol;Acc:HGNC:33888]	TRUE	OID40018	NA	batch_2	NA	TRUE	FALSE
CXorf51B	P0DPH9	ENSG00000235699	chromosome X open reading frame 51B [Source:HGNC Symbol;Acc:HGNC:42787]	TRUE	OID40144	NA	batch_2	NA	TRUE	FALSE
NFAM1	Q8NET5	ENSG00000235568	NFAT activating protein with ITAM motif 1 [Source:HGNC Symbol;Acc:HGNC:29872]	TRUE	OID41543	NA	batch_2	NA	TRUE	FALSE
RPEL1	Q2QD12	ENSG00000235376	ribulose-5-phosphate-3-epimerase like 1 [Source:HGNC Symbol;Acc:HGNC:45241]	TRUE	OID41740	NA	batch_2	NA	TRUE	FALSE
ZSCAN31	Q96LW9	ENSG00000235109	zinc finger and SCAN domain containing 31 [Source:HGNC Symbol;Acc:HGNC:14097]	TRUE	OID42078	NA	batch_2	NA	TRUE	FALSE
MAPKAPK5-AS1	Q8N8E1	ENSG00000234608	MAPKAPK5 antisense RNA 1 [Source:HGNC Symbol;Acc:HGNC:24091]	TRUE	OID40396	NA	batch_2	NA	TRUE	FALSE
PPP1R2P1	Q96PQ5	ENSG00000234515	protein phosphatase 1 regulatory inhibitor subunit 2 pseudogene 1 [Source:HGNC Symbol;Acc:HGNC:9289]	TRUE	OID41657	NA	batch_2	NA	TRUE	TRUE
PINLYP	A6NC86	ENSG00000234465	phospholipase A2 inhibitor and LY6/PLAUR domain containing [Source:HGNC Symbol;Acc:HGNC:44206]	TRUE	OID44848	NA	batch_2	NA	TRUE	TRUE
C16orf82	Q7Z2V1	ENSG00000234186	chromosome 16 open reading frame 82 [Source:HGNC Symbol;Acc:HGNC:30755]	TRUE	OID40885	NA	batch_2	NA	TRUE	FALSE
TRIM26	Q12899	ENSG00000234127	tripartite motif containing 26 [Source:HGNC Symbol;Acc:HGNC:12962]	TRUE	OID43238	NA	batch_2	NA	TRUE	TRUE
DPH3P1	Q9H4G8	ENSG00000233838	diphthamide biosynthesis 3 pseudogene 1 [Source:HGNC Symbol;Acc:HGNC:16136]	TRUE	OID41123	NA	batch_2	NA	TRUE	FALSE
GPX1	P07203	ENSG00000233276	glutathione peroxidase 1 [Source:HGNC Symbol;Acc:HGNC:4553]	TRUE	OID44693	NA	batch_2	NA	TRUE	TRUE
CTAGE3P	Q8IX95	ENSG00000232872	CTAGE family member 3, pseudogene [Source:HGNC Symbol;Acc:HGNC:24348]	TRUE	OID41062	NA	batch_2	NA	TRUE	FALSE
TNF	P01375	ENSG00000232810	tumor necrosis factor [Source:HGNC Symbol;Acc:HGNC:11892]	TRUE	OID43204	OID20074	batch_1+2	QuantileSmoothing	TRUE	TRUE
AJM1	C9J069	ENSG00000232434	apical junction component 1 homolog [Source:HGNC Symbol;Acc:HGNC:37284]	TRUE	OID40009	NA	batch_2	NA	TRUE	FALSE
PPP1R2B	Q6NXS1	ENSG00000231989	PPP1R2 family member B [Source:HGNC Symbol;Acc:HGNC:16318]	TRUE	OID42933	NA	batch_2	NA	TRUE	TRUE
PSG1	P11464	ENSG00000231924	pregnancy specific beta-1-glycoprotein 1 [Source:HGNC Symbol;Acc:HGNC:9514]	TRUE	OID44133	NA	batch_2	NA	TRUE	FALSE
HSBP1	O75506	ENSG00000230989	heat shock factor binding protein 1 [Source:HGNC Symbol;Acc:HGNC:5203]	TRUE	OID43819	NA	batch_2	NA	TRUE	TRUE
YY2	O15391	ENSG00000230797	YY2 transcription factor [Source:HGNC Symbol;Acc:HGNC:31684]	TRUE	OID42038	NA	batch_2	NA	TRUE	FALSE
PSMG3-AS1	Q96PY0	ENSG00000230487	PSMG3 antisense RNA 1 (head to head) [Source:HGNC Symbol;Acc:HGNC:22230]	TRUE	OID40536	NA	batch_2	NA	TRUE	FALSE
ANKRD18B	A2A2Z9	ENSG00000230453	ankyrin repeat domain 18B [Source:HGNC Symbol;Acc:HGNC:23644]	TRUE	OID40794	NA	batch_2	NA	TRUE	FALSE
POTEB2	H3BUK9	ENSG00000230031	POTE ankyrin domain family member B2 [Source:HGNC Symbol;Acc:HGNC:48327]	TRUE	OID40519	NA	batch_2	NA	TRUE	FALSE
SPINK8	P0C7L1	ENSG00000229453	serine peptidase inhibitor Kazal type 8 (putative) [Source:HGNC Symbol;Acc:HGNC:33160]	TRUE	OID43123	NA	batch_2	NA	TRUE	FALSE
ORM1	P02763	ENSG00000229314	orosomucoid 1 [Source:HGNC Symbol;Acc:HGNC:8498]	TRUE	OID45480	NA	batch_2	NA	TRUE	TRUE
PGA4	P0DJD7	ENSG00000229183	pepsinogen A4 [Source:HGNC Symbol;Acc:HGNC:8886]	TRUE	OID45396	NA	batch_2	NA	TRUE	TRUE
TSPY3_TSPY10	P0CV98_P0CW01	ENSG00000228927, ENSG00000236424	testis specific protein Y-linked 3 [Source:HGNC Symbol;Acc:HGNC:33876], testis specific protein Y-linked 10 [Source:HGNC Symbol;Acc:HGNC:37473]	FALSE	OID41966	NA	batch_2	NA	TRUE	FALSE
HCG22	E2RYF7	ENSG00000228789	HLA complex group 22 [Source:HGNC Symbol;Acc:HGNC:27780]	TRUE	OID42553	NA	batch_2	NA	TRUE	FALSE
DNAJB3	Q8WWF6	ENSG00000227802	DnaJ heat shock protein family (Hsp40) member B3 [Source:HGNC Symbol;Acc:HGNC:32397]	TRUE	OID42381	NA	batch_2	NA	TRUE	FALSE
LTB	Q06643	ENSG00000227507	lymphotoxin beta [Source:HGNC Symbol;Acc:HGNC:6711]	TRUE	OID43942	NA	batch_2	NA	TRUE	TRUE
SPANXB1	Q9NS25	ENSG00000227234	SPANX family member B1 [Source:HGNC Symbol;Acc:HGNC:14329]	TRUE	OID41845	NA	batch_2	NA	TRUE	FALSE
WDR46	O15213	ENSG00000227057	WD repeat domain 46 [Source:HGNC Symbol;Acc:HGNC:13923]	TRUE	OID44408	NA	batch_2	NA	TRUE	TRUE
KIF4B	Q2VIQ3	ENSG00000226650	kinesin family member 4B [Source:HGNC Symbol;Acc:HGNC:6322]	TRUE	OID41381	NA	batch_2	NA	TRUE	FALSE
NTF4	P34130	ENSG00000225950	neurotrophin 4 [Source:HGNC Symbol;Acc:HGNC:8024]	TRUE	OID42856	NA	batch_2	NA	TRUE	FALSE
C4B	P0C0L5	ENSG00000224389	complement C4B (Chido/Rodgers blood group) [Source:HGNC Symbol;Acc:HGNC:1324]	TRUE	OID45446	NA	batch_2	NA	TRUE	TRUE
CPTP	Q5TA50	ENSG00000224051	ceramide-1-phosphate transfer protein [Source:HGNC Symbol;Acc:HGNC:28116]	TRUE	OID42318	NA	batch_2	NA	TRUE	TRUE
C1QTNF5	Q9BXJ0	ENSG00000223953	C1q and TNF related 5 [Source:HGNC Symbol;Acc:HGNC:14344]	TRUE	OID44485	NA	batch_2	NA	TRUE	TRUE
CKMT1A_CKMT1B	P12532	ENSG00000223572, ENSG00000237289	creatine kinase, mitochondrial 1A [Source:HGNC Symbol;Acc:HGNC:31736], creatine kinase, mitochondrial 1B [Source:HGNC Symbol;Acc:HGNC:1995]	TRUE	OID44543	OID20721	batch_1+2	QuantileSmoothing	TRUE	TRUE
KIF28P	B7ZC32	ENSG00000223519	kinesin family member 28, pseudogene [Source:HGNC Symbol;Acc:HGNC:49205]	TRUE	OID40343	NA	batch_2	NA	TRUE	FALSE
DCDC2B	A2VCK2	ENSG00000222046	doublecortin domain containing 2B [Source:HGNC Symbol;Acc:HGNC:32576]	TRUE	OID40150	NA	batch_2	NA	TRUE	FALSE
POTEM	A6NI47	ENSG00000222036	POTE ankyrin domain family member M [Source:HGNC Symbol;Acc:HGNC:37096]	TRUE	OID41647	NA	batch_2	NA	TRUE	FALSE
PSMB11	A5LHX3	ENSG00000222028	proteasome subunit beta 11 [Source:HGNC Symbol;Acc:HGNC:31963]	TRUE	OID40534	NA	batch_2	NA	TRUE	TRUE
UBA52	P62987	ENSG00000221983	ubiquitin A-52 residue ribosomal protein fusion product 1 [Source:HGNC Symbol;Acc:HGNC:12458]	TRUE	OID40690	NA	batch_2	NA	TRUE	FALSE
CCNL2	Q96S94	ENSG00000221978	cyclin L2 [Source:HGNC Symbol;Acc:HGNC:20570]	TRUE	OID40963	NA	batch_2	NA	TRUE	FALSE
TIGD1	Q96MW7	ENSG00000221944	tigger transposable element derived 1 [Source:HGNC Symbol;Acc:HGNC:14523]	TRUE	OID40660	NA	batch_2	NA	TRUE	FALSE
NPTXR	O95502	ENSG00000221890	neuronal pentraxin receptor [Source:HGNC Symbol;Acc:HGNC:7954]	TRUE	OID44817	OID20191	batch_1+2	QuantileSmoothing	TRUE	TRUE
MAGEA3_MAGEA6	P43357_P43360	ENSG00000221867, ENSG00000197172	MAGE family member A3 [Source:HGNC Symbol;Acc:HGNC:6801], MAGE family member A6 [Source:HGNC Symbol;Acc:HGNC:6804]	FALSE	OID42725	NA	batch_2	NA	TRUE	FALSE
PLXNA4	Q9HCM2	ENSG00000221866	plexin A4 [Source:HGNC Symbol;Acc:HGNC:9102]	TRUE	OID44104	OID20597	batch_1+2	QuantileSmoothing	TRUE	TRUE
PPP3R1	P63098	ENSG00000221823	protein phosphatase 3 regulatory subunit B, alpha [Source:HGNC Symbol;Acc:HGNC:9317]	TRUE	OID44121	NA	batch_2	NA	TRUE	TRUE
UMAD1	C9J7I0	ENSG00000219545	UBAP1-MVB12-associated (UMA) domain containing 1 [Source:HGNC Symbol;Acc:HGNC:48955]	TRUE	OID43269	NA	batch_2	NA	TRUE	TRUE
TAFA5	Q7Z5A7	ENSG00000219438	TAFA chemokine like family member 5 [Source:HGNC Symbol;Acc:HGNC:21592]	TRUE	OID44306	NA	batch_2	NA	TRUE	TRUE
CCDC7	Q96M83	ENSG00000216937	coiled-coil domain containing 7 [Source:HGNC Symbol;Acc:HGNC:26533]	TRUE	OID40955	NA	batch_2	NA	TRUE	FALSE
IFI30	P13284	ENSG00000216490	IFI30 lysosomal thiol reductase [Source:HGNC Symbol;Acc:HGNC:5398]	TRUE	OID43832	NA	batch_2	NA	TRUE	TRUE
C1orf167	Q5SNV9	ENSG00000215910	chromosome 1 open reading frame 167 [Source:HGNC Symbol;Acc:HGNC:25262]	TRUE	OID40074	NA	batch_2	NA	TRUE	FALSE
CROCCP2	Q86T23	ENSG00000215908	CROCC pseudogene 2 [Source:HGNC Symbol;Acc:HGNC:28170]	TRUE	OID40131	NA	batch_2	NA	TRUE	FALSE
LINC01356	Q8N9X3	ENSG00000215866	long intergenic non-protein coding RNA 1356 [Source:HGNC Symbol;Acc:HGNC:50587]	TRUE	OID40369	NA	batch_2	NA	TRUE	FALSE
BTNL10P	A8MVZ5	ENSG00000215811	butyrophilin like 10, pseudogene [Source:HGNC Symbol;Acc:HGNC:42540]	TRUE	OID42199	NA	batch_2	NA	TRUE	FALSE
GAB4	Q2WGN9	ENSG00000215568	GRB2 associated binding protein family member 4 [Source:HGNC Symbol;Acc:HGNC:18325]	TRUE	OID40259	NA	batch_2	NA	TRUE	FALSE
DEFB116	Q30KQ4	ENSG00000215545	defensin beta 116 [Source:HGNC Symbol;Acc:HGNC:18097]	TRUE	OID42367	NA	batch_2	NA	TRUE	FALSE
EFCAB8	A8MWE9	ENSG00000215529	EF-hand calcium binding domain 8 [Source:HGNC Symbol;Acc:HGNC:34532]	TRUE	OID41147	NA	batch_2	NA	TRUE	FALSE
MYL5	Q02045	ENSG00000215375	myosin light chain 5 [Source:HGNC Symbol;Acc:HGNC:7586]	TRUE	OID41506	NA	batch_2	NA	TRUE	FALSE
VPS16	Q9H269	ENSG00000215305	VPS16 core subunit of CORVET and HOPS complexes [Source:HGNC Symbol;Acc:HGNC:14584]	TRUE	OID42012	NA	batch_2	NA	TRUE	FALSE
RNF212B	A8MTL3	ENSG00000215277	ring finger protein 212B [Source:HGNC Symbol;Acc:HGNC:20438]	TRUE	OID40571	NA	batch_2	NA	TRUE	FALSE
GOLGA8B	A8MQT2	ENSG00000215252	golgin A8 family member B [Source:HGNC Symbol;Acc:HGNC:31973]	TRUE	OID41255	NA	batch_2	NA	TRUE	FALSE
MSMP	Q1L6U9	ENSG00000215183	microseminoprotein, prostate associated [Source:HGNC Symbol;Acc:HGNC:29663]	TRUE	OID44792	NA	batch_2	NA	TRUE	TRUE
CXorf49	A8MYA2	ENSG00000215115	chromosome X open reading frame 49 [Source:HGNC Symbol;Acc:HGNC:30891]	TRUE	OID41070	NA	batch_2	NA	TRUE	FALSE
UBXN2B	Q14CS0	ENSG00000215114	UBX domain protein 2B [Source:HGNC Symbol;Acc:HGNC:27035]	TRUE	OID44374	NA	batch_2	NA	TRUE	TRUE
COL28A1	Q2UY09	ENSG00000215018	collagen type XXVIII alpha 1 chain [Source:HGNC Symbol;Acc:HGNC:22442]	TRUE	OID43551	NA	batch_2	NA	TRUE	TRUE
ARHGEF28	Q8N1W1	ENSG00000214944	Rho guanine nucleotide exchange factor 28 [Source:HGNC Symbol;Acc:HGNC:30322]	TRUE	OID40820	NA	batch_2	NA	TRUE	FALSE
DCDC2C	A8MYV0	ENSG00000214866	doublecortin domain containing 2C [Source:HGNC Symbol;Acc:HGNC:32696]	TRUE	OID42350	NA	batch_2	NA	TRUE	FALSE
EVPLL	A8MZ36	ENSG00000214860	envoplakin like [Source:HGNC Symbol;Acc:HGNC:35236]	TRUE	OID40209	NA	batch_2	NA	TRUE	FALSE
RAD51AP2	Q09MP3	ENSG00000214842	RAD51 associated protein 2 [Source:HGNC Symbol;Acc:HGNC:34417]	TRUE	OID41693	NA	batch_2	NA	TRUE	FALSE
IFRD2	Q12894	ENSG00000214706	interferon related developmental regulator 2 [Source:HGNC Symbol;Acc:HGNC:5457]	TRUE	OID41315	NA	batch_2	NA	TRUE	FALSE
ARHGEF33	A8MVX0	ENSG00000214694	Rho guanine nucleotide exchange factor 33 [Source:HGNC Symbol;Acc:HGNC:37252]	TRUE	OID40031	NA	batch_2	NA	TRUE	FALSE
ZSWIM8	A7E2V4	ENSG00000214655	zinc finger SWIM-type containing 8 [Source:HGNC Symbol;Acc:HGNC:23528]	TRUE	OID40748	NA	batch_2	NA	TRUE	FALSE
EML6	Q6ZMW3	ENSG00000214595	EMAP like 6 [Source:HGNC Symbol;Acc:HGNC:35412]	TRUE	OID41158	NA	batch_2	NA	TRUE	FALSE
STARD10	Q9Y365	ENSG00000214530	StAR related lipid transfer domain containing 10 [Source:HGNC Symbol;Acc:HGNC:10666]	TRUE	OID41879	NA	batch_2	NA	TRUE	FALSE
PPME1	Q9Y570	ENSG00000214517	protein phosphatase methylesterase 1 [Source:HGNC Symbol;Acc:HGNC:30178]	TRUE	OID44114	NA	batch_2	NA	TRUE	TRUE
NEURL1B	A8MQ27	ENSG00000214357	neuralized E3 ubiquitin protein ligase 1B [Source:HGNC Symbol;Acc:HGNC:35422]	TRUE	OID41541	NA	batch_2	NA	TRUE	FALSE
MBLAC1	A4D2B0	ENSG00000214309	metallo-beta-lactamase domain containing 1 [Source:HGNC Symbol;Acc:HGNC:22180]	TRUE	OID40399	NA	batch_2	NA	TRUE	FALSE
ANG	P03950	ENSG00000214274	angiogenin [Source:HGNC Symbol;Acc:HGNC:483]	TRUE	OID45305	OID20403	batch_1+2	QuantileSmoothing	TRUE	TRUE
FIS1	Q9Y3D6	ENSG00000214253	fission, mitochondrial 1 [Source:HGNC Symbol;Acc:HGNC:21689]	TRUE	OID44656	OID20722	batch_1+2	QuantileSmoothing	TRUE	TRUE
MINDY4B	A8MYZ0	ENSG00000214237	MINDY family member 4B [Source:HGNC Symbol;Acc:HGNC:35475]	TRUE	OID40411	NA	batch_2	NA	TRUE	FALSE
SH3D21	A4FU49	ENSG00000214193	SH3 domain containing 21 [Source:HGNC Symbol;Acc:HGNC:26236]	TRUE	OID41792	NA	batch_2	NA	TRUE	FALSE
FBXO16	Q8IX29	ENSG00000214050	F-box protein 16 [Source:HGNC Symbol;Acc:HGNC:13618]	TRUE	OID41203	NA	batch_2	NA	TRUE	FALSE
GANC	Q8TET4	ENSG00000214013	glucosidase alpha, neutral C [Source:HGNC Symbol;Acc:HGNC:4139]	TRUE	OID40261	NA	batch_2	NA	TRUE	FALSE
AP1G2	O75843	ENSG00000213983	adaptor related protein complex 1 subunit gamma 2 [Source:HGNC Symbol;Acc:HGNC:556]	TRUE	OID42129	NA	batch_2	NA	TRUE	FALSE
CCL27	Q9Y4X3	ENSG00000213927	C-C motif chemokine ligand 27 [Source:HGNC Symbol;Acc:HGNC:10626]	TRUE	OID44503	OID20121	batch_1+2	QuantileSmoothing	TRUE	TRUE
DNASE1	P24855	ENSG00000213918	deoxyribonuclease 1 [Source:HGNC Symbol;Acc:HGNC:2956]	TRUE	OID45108	NA	batch_2	NA	TRUE	TRUE
CEACAM16	Q2WEN9	ENSG00000213892	CEA cell adhesion molecule 16, tectorial membrane component [Source:HGNC Symbol;Acc:HGNC:31948]	TRUE	OID43512	NA	batch_2	NA	TRUE	TRUE
CEACAM18	A8MTB9	ENSG00000213822	CEA cell adhesion molecule 18 [Source:HGNC Symbol;Acc:HGNC:31949]	TRUE	OID42257	NA	batch_2	NA	TRUE	FALSE
KLRK1	P26718	ENSG00000213809	killer cell lectin like receptor K1 [Source:HGNC Symbol;Acc:HGNC:18788]	TRUE	OID43902	NA	batch_2	NA	TRUE	TRUE
ATP6V1G2	O95670	ENSG00000213760	ATPase H+ transporting V1 subunit G2 [Source:HGNC Symbol;Acc:HGNC:862]	TRUE	OID43396	NA	batch_2	NA	TRUE	FALSE
CLIC1	O00299	ENSG00000213719	chloride intracellular channel 1 [Source:HGNC Symbol;Acc:HGNC:2062]	TRUE	OID41027	NA	batch_2	NA	TRUE	FALSE
NCKIPSD	Q9NZQ3	ENSG00000213672	NCK interacting protein with SH3 domain [Source:HGNC Symbol;Acc:HGNC:15486]	TRUE	OID42812	NA	batch_2	NA	TRUE	TRUE
LAT	O43561	ENSG00000213658	linker for activation of T cells [Source:HGNC Symbol;Acc:HGNC:18874]	TRUE	OID43914	OID20640	batch_1+2	QuantileSmoothing	TRUE	TRUE
GPSM3	Q9Y4H4	ENSG00000213654	G protein signaling modulator 3 [Source:HGNC Symbol;Acc:HGNC:13945]	TRUE	OID40275	NA	batch_2	NA	TRUE	FALSE
NDUFS3	O75489	ENSG00000213619	NADH:ubiquinone oxidoreductase core subunit S3 [Source:HGNC Symbol;Acc:HGNC:7710]	TRUE	OID40452	NA	batch_2	NA	TRUE	FALSE
TMX2	Q9Y320	ENSG00000213593	thioredoxin related transmembrane protein 2 [Source:HGNC Symbol;Acc:HGNC:30739]	TRUE	OID40666	NA	batch_2	NA	TRUE	TRUE
CPLX3	Q8WVH0	ENSG00000213578	complexin 3 [Source:HGNC Symbol;Acc:HGNC:27652]	TRUE	OID41050	NA	batch_2	NA	TRUE	FALSE
DNAJC9	Q8WXX5	ENSG00000213551	DnaJ heat shock protein family (Hsp40) member C9 [Source:HGNC Symbol;Acc:HGNC:19123]	TRUE	OID43624	NA	batch_2	NA	TRUE	TRUE
SIPA1	Q96FS4	ENSG00000213445	signal-induced proliferation-associated 1 [Source:HGNC Symbol;Acc:HGNC:10885]	TRUE	OID43080	NA	batch_2	NA	TRUE	TRUE
GPC2	Q8N158	ENSG00000213420	glypican 2 [Source:HGNC Symbol;Acc:HGNC:4450]	TRUE	OID41260	NA	batch_2	NA	TRUE	FALSE
LCAT	P04180	ENSG00000213398	lecithin-cholesterol acyltransferase [Source:HGNC Symbol;Acc:HGNC:6522]	TRUE	OID45381	NA	batch_2	NA	TRUE	TRUE
CHUK	O15111	ENSG00000213341	component of inhibitor of nuclear factor kappa B kinase complex [Source:HGNC Symbol;Acc:HGNC:1974]	TRUE	OID42293	NA	batch_2	NA	TRUE	TRUE
NRAS	P01111	ENSG00000213281	NRAS proto-oncogene, GTPase [Source:HGNC Symbol;Acc:HGNC:7989]	TRUE	OID40467	NA	batch_2	NA	TRUE	FALSE
TCL1B	O95988	ENSG00000213231	TCL1 family AKT coactivator B [Source:HGNC Symbol;Acc:HGNC:11649]	TRUE	OID41922	OID20058	batch_1+2	QuantileSmoothing	TRUE	TRUE
DNLZ	Q5SXM8	ENSG00000213221	DNL-type zinc finger [Source:HGNC Symbol;Acc:HGNC:33879]	TRUE	OID42383	NA	batch_2	NA	TRUE	FALSE
CFAP45	Q9UL16	ENSG00000213085	cilia and flagella associated protein 45 [Source:HGNC Symbol;Acc:HGNC:17229]	TRUE	OID42285	NA	batch_2	NA	TRUE	FALSE
CEP43	O95684	ENSG00000213066	centrosomal protein 43 [Source:HGNC Symbol;Acc:HGNC:17012]	TRUE	OID43519	OID20084	batch_1+2	MedianCentering	TRUE	TRUE
KLK9	Q9UKQ9	ENSG00000213022	kallikrein related peptidase 9 [Source:HGNC Symbol;Acc:HGNC:6370]	TRUE	OID42679	NA	batch_2	NA	TRUE	FALSE
PTTG3P	Q9NZH4	ENSG00000213005	pituitary tumor-transforming 3, pseudogene [Source:HGNC Symbol;Acc:HGNC:13422]	TRUE	OID40538	NA	batch_2	NA	TRUE	FALSE
MAP10	Q9P2G4	ENSG00000212916	microtubule associated protein 10 [Source:HGNC Symbol;Acc:HGNC:29265]	TRUE	OID41446	NA	batch_2	NA	TRUE	FALSE
RNF208	Q9H0X6	ENSG00000212864	ring finger protein 208 [Source:HGNC Symbol;Acc:HGNC:25420]	TRUE	OID40570	NA	batch_2	NA	TRUE	FALSE
ST13P5	Q8NFI4	ENSG00000212789	ST13, Hsp70 interacting protein pseudogene 5 [Source:HGNC Symbol;Acc:HGNC:18556]	TRUE	OID41874	NA	batch_2	NA	TRUE	FALSE
IGLC2	P0DOY2	ENSG00000211677	immunoglobulin lambda constant 2 [Source:HGNC Symbol;Acc:HGNC:5856]	TRUE	OID45470	NA	batch_2	NA	TRUE	TRUE
AKR7L	Q8NHP1	ENSG00000211454	aldo-keto reductase family 7 like (gene/pseudogene) [Source:HGNC Symbol;Acc:HGNC:24056]	TRUE	OID42106	NA	batch_2	NA	TRUE	TRUE
SELENOH	Q8IZQ5	ENSG00000211450	selenoprotein H [Source:HGNC Symbol;Acc:HGNC:18251]	TRUE	OID43061	NA	batch_2	NA	TRUE	FALSE
METTL6	Q8TCB7	ENSG00000206562	methyltransferase 6, tRNA N3-cytidine [Source:HGNC Symbol;Acc:HGNC:28343]	TRUE	OID41467	NA	batch_2	NA	TRUE	TRUE
COLQ	Q9Y215	ENSG00000206561	collagen like tail subunit of asymmetric acetylcholinesterase [Source:HGNC Symbol;Acc:HGNC:2226]	TRUE	OID40126	NA	batch_2	NA	TRUE	TRUE
ANKRD28	O15084	ENSG00000206560	ankyrin repeat domain 28 [Source:HGNC Symbol;Acc:HGNC:29024]	TRUE	OID40016	NA	batch_2	NA	TRUE	FALSE
ZCWPW2	Q504Y3	ENSG00000206559	zinc finger CW-type and PWWP domain containing 2 [Source:HGNC Symbol;Acc:HGNC:23574]	TRUE	OID40731	NA	batch_2	NA	TRUE	FALSE
CD200R1L	Q6Q8B3	ENSG00000206531	CD200 receptor 1 like [Source:HGNC Symbol;Acc:HGNC:24665]	TRUE	OID40967	NA	batch_2	NA	TRUE	FALSE
HLA-A	P04439	ENSG00000206503	major histocompatibility complex, class I, A [Source:HGNC Symbol;Acc:HGNC:4931]	TRUE	OID43804	NA	batch_2	NA	TRUE	TRUE
COL6A6	A6NMZ7	ENSG00000206384	collagen type VI alpha 6 chain [Source:HGNC Symbol;Acc:HGNC:27023]	TRUE	OID41047	NA	batch_2	NA	TRUE	FALSE
PRR23A	A6NEV1	ENSG00000206260	proline rich 23A [Source:HGNC Symbol;Acc:HGNC:37172]	TRUE	OID42952	NA	batch_2	NA	TRUE	TRUE
ANKUB1	A6NFN9	ENSG00000206199	ankyrin repeat and ubiquitin domain containing 1 [Source:HGNC Symbol;Acc:HGNC:29642]	TRUE	OID40803	NA	batch_2	NA	TRUE	FALSE
CFAP99	D6REC4	ENSG00000206113	cilia and flagella associated protein 99 [Source:HGNC Symbol;Acc:HGNC:51180]	TRUE	OID41007	NA	batch_2	NA	TRUE	FALSE
SERPINB5	P36952	ENSG00000206075	serpin family B member 5 [Source:HGNC Symbol;Acc:HGNC:8949]	TRUE	OID43064	NA	batch_2	NA	FALSE	FALSE
SERPINB4	P48594	ENSG00000206073	serpin family B member 4 [Source:HGNC Symbol;Acc:HGNC:10570]	TRUE	OID44230	NA	batch_2	NA	TRUE	TRUE
JPT2	Q9H910	ENSG00000206053	Jupiter microtubule associated homolog 2 [Source:HGNC Symbol;Acc:HGNC:14137]	TRUE	OID43884	NA	batch_2	NA	TRUE	TRUE
DEFA1	P59665	ENSG00000206047	defensin alpha 1 [Source:HGNC Symbol;Acc:HGNC:2761]	TRUE	OID45350	NA	batch_2	NA	TRUE	TRUE
DNAJC19	Q96DA6	ENSG00000205981	DnaJ heat shock protein family (Hsp40) member C19 [Source:HGNC Symbol;Acc:HGNC:30528]	TRUE	OID41116	NA	batch_2	NA	TRUE	FALSE
DAZ4	Q86SG3	ENSG00000205916	deleted in azoospermia 4 [Source:HGNC Symbol;Acc:HGNC:15966]	TRUE	OID42348	NA	batch_2	NA	TRUE	FALSE
C22orf42	Q6IC83	ENSG00000205856	chromosome 22 open reading frame 42 [Source:HGNC Symbol;Acc:HGNC:27160]	TRUE	OID40894	NA	batch_2	NA	TRUE	FALSE
CLEC6A	Q6EIG7	ENSG00000205846	C-type lectin domain containing 6A [Source:HGNC Symbol;Acc:HGNC:14556]	TRUE	OID42297	NA	batch_2	NA	TRUE	FALSE
C16orf96	A6NNT2	ENSG00000205832	chromosome 16 open reading frame 96 [Source:HGNC Symbol;Acc:HGNC:40031]	TRUE	OID40887	NA	batch_2	NA	TRUE	FALSE
RIMOC1	A6NDU8	ENSG00000205765	RAB7A interacting MON1-CCZ1 complex subunit 1 [Source:HGNC Symbol;Acc:HGNC:27750]	TRUE	OID43014	NA	batch_2	NA	TRUE	TRUE
CRYZL1	O95825	ENSG00000205758	crystallin zeta like 1 [Source:HGNC Symbol;Acc:HGNC:2420]	TRUE	OID43569	NA	batch_2	NA	TRUE	TRUE
MANSC4	A6NHS7	ENSG00000205693	MANSC domain containing 4 [Source:HGNC Symbol;Acc:HGNC:40023]	TRUE	OID42731	NA	batch_2	NA	TRUE	FALSE
DPF3	Q92784	ENSG00000205683	double PHD fingers 3 [Source:HGNC Symbol;Acc:HGNC:17427]	TRUE	OID41122	NA	batch_2	NA	TRUE	FALSE
NAP1L4	Q99733	ENSG00000205531	nucleosome assembly protein 1 like 4 [Source:HGNC Symbol;Acc:HGNC:7640]	TRUE	OID44009	NA	batch_2	NA	TRUE	TRUE
CFI	P05156	ENSG00000205403	complement factor I [Source:HGNC Symbol;Acc:HGNC:5394]	TRUE	OID45456	NA	batch_2	NA	TRUE	TRUE
INSYN1	Q2T9L4	ENSG00000205363	inhibitory synaptic factor 1 [Source:HGNC Symbol;Acc:HGNC:33753]	TRUE	OID40311	NA	batch_2	NA	TRUE	FALSE
TECPR1	Q7Z6L1	ENSG00000205356	tectonin beta-propeller repeat containing 1 [Source:HGNC Symbol;Acc:HGNC:22214]	TRUE	OID40650	NA	batch_2	NA	TRUE	FALSE
ADGRG1	Q9Y653	ENSG00000205336	adhesion G protein-coupled receptor G1 [Source:HGNC Symbol;Acc:HGNC:4512]	TRUE	OID43338	NA	batch_2	NA	TRUE	TRUE
SNX2	O60749	ENSG00000205302	sorting nexin 2 [Source:HGNC Symbol;Acc:HGNC:11173]	TRUE	OID44270	NA	batch_2	NA	TRUE	TRUE
VIT	Q6UXI7	ENSG00000205221	vitrin [Source:HGNC Symbol;Acc:HGNC:12697]	TRUE	OID45014	NA	batch_2	NA	TRUE	TRUE
C4orf46	Q504U0	ENSG00000205208	chromosome 4 open reading frame 46 [Source:HGNC Symbol;Acc:HGNC:27320]	TRUE	OID40903	NA	batch_2	NA	TRUE	FALSE
FABP9	Q0Z7S8	ENSG00000205186	fatty acid binding protein 9 [Source:HGNC Symbol;Acc:HGNC:3563]	TRUE	OID42436	OID20501	batch_1+2	QuantileSmoothing	TRUE	TRUE
SYCE1L	A8MT33	ENSG00000205078	synaptonemal complex central element protein 1 like [Source:HGNC Symbol;Acc:HGNC:37236]	TRUE	OID43150	NA	batch_2	NA	TRUE	FALSE
LGALS7	P47929	ENSG00000205076	galectin 7 [Source:HGNC Symbol;Acc:HGNC:6568]	TRUE	OID43922	NA	batch_2	NA	TRUE	TRUE
CLLU1-AS1	Q5K130	ENSG00000205057	CLLU1 antisense RNA 1 [Source:HGNC Symbol;Acc:HGNC:24070]	TRUE	OID41030	NA	batch_2	NA	TRUE	FALSE
SPIRE2	Q8WWL2	ENSG00000204991	spire type actin nucleation factor 2 [Source:HGNC Symbol;Acc:HGNC:30623]	TRUE	OID43124	NA	batch_2	NA	TRUE	FALSE
ERICH4	A6NGS2	ENSG00000204978	glutamate rich 4 [Source:HGNC Symbol;Acc:HGNC:34497]	TRUE	OID41170	NA	batch_2	NA	TRUE	FALSE
PCDHA1	Q9Y5I3	ENSG00000204970	protocadherin alpha 1 [Source:HGNC Symbol;Acc:HGNC:8663]	TRUE	OID41594	NA	batch_2	NA	TRUE	FALSE
CD177	Q8N6Q3	ENSG00000204936	CD177 molecule [Source:HGNC Symbol;Acc:HGNC:30072]	TRUE	OID45058	NA	batch_2	NA	TRUE	FALSE
PRR20A	P86496	ENSG00000204919	proline rich 20A [Source:HGNC Symbol;Acc:HGNC:24754]	TRUE	OID42950	NA	batch_2	NA	TRUE	TRUE
PRR20B	P86481	ENSG00000204918	proline rich 20B [Source:HGNC Symbol;Acc:HGNC:37220]	TRUE	OID42951	NA	batch_2	NA	TRUE	TRUE
MZT1	Q08AG7	ENSG00000204899	mitotic spindle organizing protein 1 [Source:HGNC Symbol;Acc:HGNC:33830]	TRUE	OID42800	NA	batch_2	NA	TRUE	FALSE
IGFL4	Q6B9Z1	ENSG00000204869	IGF like family member 4 [Source:HGNC Symbol;Acc:HGNC:32931]	TRUE	OID43838	NA	batch_2	NA	TRUE	TRUE
ZBTB48	P10074	ENSG00000204859	zinc finger and BTB domain containing 48 [Source:HGNC Symbol;Acc:HGNC:4930]	TRUE	OID42042	NA	batch_2	NA	TRUE	FALSE
DCTN1	Q14203	ENSG00000204843	dynactin subunit 1 [Source:HGNC Symbol;Acc:HGNC:2711]	TRUE	OID43595	NA	batch_2	NA	TRUE	TRUE
ATXN2	Q99700	ENSG00000204842	ataxin 2 [Source:HGNC Symbol;Acc:HGNC:10555]	TRUE	OID42165	NA	batch_2	NA	TRUE	TRUE
MRPL53	Q96EL3	ENSG00000204822	mitochondrial ribosomal protein L53 [Source:HGNC Symbol;Acc:HGNC:16684]	TRUE	OID41488	NA	batch_2	NA	TRUE	TRUE
ODAD4	Q96NG3	ENSG00000204815	outer dynein arm docking complex subunit 4 [Source:HGNC Symbol;Acc:HGNC:25280]	TRUE	OID41571	NA	batch_2	NA	TRUE	FALSE
INSYN2B	A6NMK8	ENSG00000204767	inhibitory synaptic factor family member 2B [Source:HGNC Symbol;Acc:HGNC:37271]	TRUE	OID40312	NA	batch_2	NA	TRUE	FALSE
AKT1S1	Q96B36	ENSG00000204673	AKT1 substrate 1 [Source:HGNC Symbol;Acc:HGNC:28426]	TRUE	OID43352	NA	batch_2	NA	TRUE	TRUE
IL31	Q6EBC2	ENSG00000204671	interleukin 31 [Source:HGNC Symbol;Acc:HGNC:19372]	TRUE	OID42620	NA	batch_2	NA	TRUE	FALSE
MOG	Q16653	ENSG00000204655	myelin oligodendrocyte glycoprotein [Source:HGNC Symbol;Acc:HGNC:7197]	TRUE	OID43981	NA	batch_2	NA	TRUE	TRUE
ZFP57	Q9NU63	ENSG00000204644	ZFP57 zinc finger protein [Source:HGNC Symbol;Acc:HGNC:18791]	TRUE	OID40735	NA	batch_2	NA	TRUE	TRUE
TRIM31	Q9BZY9	ENSG00000204616	tripartite motif containing 31 [Source:HGNC Symbol;Acc:HGNC:16289]	TRUE	OID40675	NA	batch_2	NA	TRUE	FALSE
TRIM40	Q6P9F5	ENSG00000204614	tripartite motif containing 40 [Source:HGNC Symbol;Acc:HGNC:18736]	TRUE	OID43240	NA	batch_2	NA	TRUE	FALSE
TRIM39	Q9HCM9	ENSG00000204599	tripartite motif containing 39 [Source:HGNC Symbol;Acc:HGNC:10065]	TRUE	OID43239	NA	batch_2	NA	TRUE	TRUE
HLA-E	P13747	ENSG00000204592	major histocompatibility complex, class I, E [Source:HGNC Symbol;Acc:HGNC:4962]	TRUE	OID43806	OID20532	batch_1+2	QuantileSmoothing	TRUE	FALSE
DDR1	Q08345	ENSG00000204580	discoidin domain receptor tyrosine kinase 1 [Source:HGNC Symbol;Acc:HGNC:2730]	TRUE	OID44600	NA	batch_2	NA	TRUE	TRUE
PRR3	P79522	ENSG00000204576	proline rich 3 [Source:HGNC Symbol;Acc:HGNC:21149]	TRUE	OID40530	NA	batch_2	NA	TRUE	FALSE
MRPS18B	Q9Y676	ENSG00000204568	mitochondrial ribosomal protein S18B [Source:HGNC Symbol;Acc:HGNC:14516]	TRUE	OID42777	NA	batch_2	NA	TRUE	FALSE
DEFB121	Q5J5C9	ENSG00000204548	defensin beta 121 [Source:HGNC Symbol;Acc:HGNC:18101]	TRUE	OID41093	NA	batch_2	NA	TRUE	FALSE
CDSN	Q15517	ENSG00000204539	corneodesmosin [Source:HGNC Symbol;Acc:HGNC:1802]	TRUE	OID43511	OID20667	batch_1+2	MedianCentering	TRUE	TRUE
CCHCR1	Q8TD31	ENSG00000204536	coiled-coil alpha-helical rod protein 1 [Source:HGNC Symbol;Acc:HGNC:13930]	TRUE	OID40960	NA	batch_2	NA	TRUE	FALSE
MICA_MICB	Q29980_Q29983	ENSG00000204520, ENSG00000204516	MHC class I polypeptide-related sequence A [Source:HGNC Symbol;Acc:HGNC:7090], MHC class I polypeptide-related sequence B [Source:HGNC Symbol;Acc:HGNC:7091]	FALSE	OID43972	NA	batch_2	NA	TRUE	TRUE
NCR3	O14931	ENSG00000204475	natural cytotoxicity triggering receptor 3 [Source:HGNC Symbol;Acc:HGNC:19077]	TRUE	OID41531	NA	batch_2	NA	TRUE	TRUE
AIF1	P55008	ENSG00000204472	allograft inflammatory factor 1 [Source:HGNC Symbol;Acc:HGNC:352]	TRUE	OID42100	NA	batch_2	NA	TRUE	FALSE
BAG6	P46379	ENSG00000204463	BAG cochaperone 6 [Source:HGNC Symbol;Acc:HGNC:13919]	TRUE	OID43405	OID20114	batch_1+2	MedianCentering	TRUE	TRUE
LINC02872	A2RU37	ENSG00000204446	long intergenic non-protein coding RNA 2872 [Source:HGNC Symbol;Acc:HGNC:33817]	TRUE	OID41414	NA	batch_2	NA	TRUE	FALSE
APOM	O95445	ENSG00000204444	apolipoprotein M [Source:HGNC Symbol;Acc:HGNC:13916]	TRUE	OID45313	OID20374	batch_1+2	MedianCentering	TRUE	TRUE
GPANK1	O95872	ENSG00000204438	G-patch domain and ankyrin repeats 1 [Source:HGNC Symbol;Acc:HGNC:13920]	TRUE	OID41256	NA	batch_2	NA	TRUE	FALSE
POTEKP	Q9BYX7	ENSG00000204434	POTE ankyrin domain family member K, pseudogene [Source:HGNC Symbol;Acc:HGNC:30182]	TRUE	OID41646	NA	batch_2	NA	TRUE	FALSE
MPIG6B	O95866	ENSG00000204420	megakaryocyte and platelet inhibitory receptor G6b [Source:HGNC Symbol;Acc:HGNC:13937]	TRUE	OID44791	OID20779	batch_1+2	QuantileSmoothing	TRUE	TRUE
HSPA1A	P0DMV8	ENSG00000204389	heat shock protein family A (Hsp70) member 1A [Source:HGNC Symbol;Acc:HGNC:5232]	TRUE	OID44705	OID20718	batch_1+2	QuantileSmoothing	TRUE	FALSE
SLC44A4	Q53GD3	ENSG00000204385	solute carrier family 44 member 4 [Source:HGNC Symbol;Acc:HGNC:13941]	TRUE	OID43096	NA	batch_2	NA	TRUE	FALSE
LAYN	Q6UX15	ENSG00000204381	layilin [Source:HGNC Symbol;Acc:HGNC:29471]	TRUE	OID43917	NA	batch_2	NA	TRUE	TRUE
SKIC2	Q15477	ENSG00000204351	SKI2 subunit of superkiller complex [Source:HGNC Symbol;Acc:HGNC:10898]	TRUE	OID43084	NA	batch_2	NA	TRUE	TRUE
DXO	O77932	ENSG00000204348	decapping exoribonuclease [Source:HGNC Symbol;Acc:HGNC:2992]	TRUE	OID43643	NA	batch_2	NA	TRUE	TRUE
CD300LD	Q6UXZ3	ENSG00000204345	CD300 molecule like family member d [Source:HGNC Symbol;Acc:HGNC:16848]	TRUE	OID40097	NA	batch_2	NA	TRUE	FALSE
FKBPL	Q9UIM3	ENSG00000204315	FKBP prolyl isomerase like [Source:HGNC Symbol;Acc:HGNC:13949]	TRUE	OID43719	NA	batch_2	NA	TRUE	TRUE
RNF5	Q99942	ENSG00000204308	ring finger protein 5 [Source:HGNC Symbol;Acc:HGNC:10068]	TRUE	OID44190	NA	batch_2	NA	TRUE	TRUE
AGER	Q15109	ENSG00000204305	advanced glycosylation end-product specific receptor [Source:HGNC Symbol;Acc:HGNC:320]	TRUE	OID44451	OID20756	batch_1+2	MedianCentering	TRUE	TRUE
COL15A1	P39059	ENSG00000204291	collagen type XV alpha 1 chain [Source:HGNC Symbol;Acc:HGNC:2192]	TRUE	OID45081	NA	batch_2	NA	TRUE	TRUE
HLA-DRA	P01903	ENSG00000204287	major histocompatibility complex, class II, DR alpha [Source:HGNC Symbol;Acc:HGNC:4947]	TRUE	OID43805	OID20520	batch_1+2	MedianCentering	TRUE	TRUE
PAGE3	Q5JUK9	ENSG00000204279	PAGE family member 3 [Source:HGNC Symbol;Acc:HGNC:4110]	TRUE	OID41583	NA	batch_2	NA	TRUE	FALSE
BRD2	P25440	ENSG00000204256	bromodomain containing 2 [Source:HGNC Symbol;Acc:HGNC:1103]	TRUE	OID42192	NA	batch_2	NA	TRUE	FALSE
PFDN6	O15212	ENSG00000204220	prefoldin subunit 6 [Source:HGNC Symbol;Acc:HGNC:4926]	TRUE	OID42901	NA	batch_2	NA	TRUE	FALSE
PTPN20	Q4JDL3	ENSG00000204179	protein tyrosine phosphatase non-receptor type 20 [Source:HGNC Symbol;Acc:HGNC:23423]	TRUE	OID41678	NA	batch_2	NA	TRUE	FALSE
GPRIN2	O60269	ENSG00000204175	G protein regulated inducer of neurite outgrowth 2 [Source:HGNC Symbol;Acc:HGNC:23730]	TRUE	OID41263	NA	batch_2	NA	TRUE	FALSE
AGAP9_AGAP4	Q5VTM2_Q96P64	ENSG00000204172, ENSG00000188234	ArfGAP with GTPase domain, ankyrin repeat and PH domain 9 [Source:HGNC Symbol;Acc:HGNC:23463], ArfGAP with GTPase domain, ankyrin repeat and PH domain 4 [Source:HGNC Symbol;Acc:HGNC:23459]	FALSE	OID40772	NA	batch_2	NA	TRUE	FALSE
NHSL2	Q5HYW2	ENSG00000204131	NHS like 2 [Source:HGNC Symbol;Acc:HGNC:33737]	TRUE	OID40459	NA	batch_2	NA	TRUE	TRUE
GIGYF2	Q6Y7W6	ENSG00000204120	GRB10 interacting GYF protein 2 [Source:HGNC Symbol;Acc:HGNC:11960]	TRUE	OID43752	NA	batch_2	NA	TRUE	TRUE
BMP2KL	Q5H9B9	ENSG00000204113	BMP2 inducible kinase like (pseudogene) [Source:HGNC Symbol;Acc:HGNC:17080]	TRUE	OID40866	NA	batch_2	NA	TRUE	FALSE
TRAF3IP1	Q8TDR0	ENSG00000204104	TRAF3 interacting protein 1 [Source:HGNC Symbol;Acc:HGNC:17861]	TRUE	OID40673	NA	batch_2	NA	TRUE	FALSE
MAFB	Q9Y5Q3	ENSG00000204103	MAF bZIP transcription factor B [Source:HGNC Symbol;Acc:HGNC:6408]	TRUE	OID41440	NA	batch_2	NA	TRUE	FALSE
RPA4	Q13156	ENSG00000204086	replication protein A4 [Source:HGNC Symbol;Acc:HGNC:30305]	TRUE	OID43025	NA	batch_2	NA	TRUE	FALSE
LRIT2	A6NDA9	ENSG00000204033	leucine rich repeat, Ig-like and transmembrane domains 2 [Source:HGNC Symbol;Acc:HGNC:23443]	TRUE	OID40373	NA	batch_2	NA	TRUE	FALSE
TRPC5OS	A6NMA1	ENSG00000204025	TRPC5 opposite strand [Source:HGNC Symbol;Acc:HGNC:40593]	TRUE	OID41959	NA	batch_2	NA	TRUE	FALSE
LIPN	Q5VXI9	ENSG00000204020	lipase family member N [Source:HGNC Symbol;Acc:HGNC:23452]	TRUE	OID41416	NA	batch_2	NA	TRUE	FALSE
CT83	Q5H943	ENSG00000204019	cancer/testis antigen 83 [Source:HGNC Symbol;Acc:HGNC:33494]	TRUE	OID41061	NA	batch_2	NA	TRUE	FALSE
SAMD13	Q5VXD3	ENSG00000203943	sterile alpha motif domain containing 13 [Source:HGNC Symbol;Acc:HGNC:24582]	TRUE	OID41765	NA	batch_2	NA	TRUE	FALSE
C10orf62	Q5T681	ENSG00000203942	chromosome 10 open reading frame 62 [Source:HGNC Symbol;Acc:HGNC:23294]	TRUE	OID40069	NA	batch_2	NA	TRUE	FALSE
KHDC3L	Q587J8	ENSG00000203908	KH domain containing 3 like, subcortical maternal complex member [Source:HGNC Symbol;Acc:HGNC:33699]	TRUE	OID42656	NA	batch_2	NA	TRUE	FALSE
PCMTD2	Q9NV79	ENSG00000203880	protein-L-isoaspartate (D-aspartate) O-methyltransferase domain containing 2 [Source:HGNC Symbol;Acc:HGNC:15882]	TRUE	OID40494	NA	batch_2	NA	TRUE	TRUE
C6orf163	Q5TEZ5	ENSG00000203872	chromosome 6 open reading frame 163 [Source:HGNC Symbol;Acc:HGNC:21403]	TRUE	OID40910	NA	batch_2	NA	TRUE	FALSE
RBM20	Q5T481	ENSG00000203867	RNA binding motif protein 20 [Source:HGNC Symbol;Acc:HGNC:27424]	TRUE	OID41706	NA	batch_2	NA	TRUE	FALSE
EEF1AKMT2	Q5JPI9	ENSG00000203791	EEF1A lysine methyltransferase 2 [Source:HGNC Symbol;Acc:HGNC:33787]	TRUE	OID41143	NA	batch_2	NA	TRUE	FALSE
LELP1	Q5T871	ENSG00000203784	late cornified envelope like proline rich 1 [Source:HGNC Symbol;Acc:HGNC:32046]	TRUE	OID42691	NA	batch_2	NA	TRUE	FALSE
FANK1	Q8TC84	ENSG00000203780	fibronectin type III and ankyrin repeat domains 1 [Source:HGNC Symbol;Acc:HGNC:23527]	TRUE	OID41199	NA	batch_2	NA	TRUE	FALSE
CR1	P17927	ENSG00000203710	complement C3b/C4b receptor 1 (Knops blood group) [Source:HGNC Symbol;Acc:HGNC:2334]	TRUE	OID45340	NA	batch_2	NA	TRUE	TRUE
CAPN8	A6NHC0	ENSG00000203697	calpain 8 [Source:HGNC Symbol;Acc:HGNC:1485]	TRUE	OID40922	NA	batch_2	NA	TRUE	FALSE
EFCAB2	Q5VUJ9	ENSG00000203666	EF-hand calcium binding domain 2 [Source:HGNC Symbol;Acc:HGNC:28166]	TRUE	OID42396	NA	batch_2	NA	TRUE	FALSE
GP1BB	P13224	ENSG00000203618	glycoprotein Ib platelet subunit beta [Source:HGNC Symbol;Acc:HGNC:4440]	TRUE	OID43770	NA	batch_2	NA	TRUE	TRUE
RORB	Q92753	ENSG00000198963	RAR related orphan receptor B [Source:HGNC Symbol;Acc:HGNC:10259]	TRUE	OID43023	NA	batch_2	NA	TRUE	FALSE
PJA2	O43164	ENSG00000198961	praja ring finger ubiquitin ligase 2 [Source:HGNC Symbol;Acc:HGNC:17481]	TRUE	OID42910	NA	batch_2	NA	TRUE	TRUE
TGM2	P21980	ENSG00000198959	transglutaminase 2 [Source:HGNC Symbol;Acc:HGNC:11778]	TRUE	OID44976	OID20141	batch_1+2	MedianCentering	TRUE	TRUE
NAGA	P17050	ENSG00000198951	alpha-N-acetylgalactosaminidase [Source:HGNC Symbol;Acc:HGNC:7631]	TRUE	OID44006	NA	batch_2	NA	TRUE	FALSE
MFAP3L	O75121	ENSG00000198948	microfibril associated protein 3 like [Source:HGNC Symbol;Acc:HGNC:29083]	TRUE	OID42755	NA	batch_2	NA	TRUE	FALSE
DMD	P11532	ENSG00000198947	dystrophin [Source:HGNC Symbol;Acc:HGNC:2928]	TRUE	OID43613	NA	batch_2	NA	TRUE	TRUE
SOWAHA	Q2M3V2	ENSG00000198944	sosondowah ankyrin repeat domain family member A [Source:HGNC Symbol;Acc:HGNC:27033]	TRUE	OID43113	NA	batch_2	NA	TRUE	FALSE
GPRASP1	Q5JY77	ENSG00000198932	G protein-coupled receptor associated sorting protein 1 [Source:HGNC Symbol;Acc:HGNC:24834]	TRUE	OID41261	NA	batch_2	NA	TRUE	FALSE
APRT	P07741	ENSG00000198931	adenine phosphoribosyltransferase [Source:HGNC Symbol;Acc:HGNC:626]	TRUE	OID43375	NA	batch_2	NA	TRUE	TRUE
KIAA0753	Q2KHM9	ENSG00000198920	KIAA0753 [Source:HGNC Symbol;Acc:HGNC:29110]	TRUE	OID40335	NA	batch_2	NA	TRUE	FALSE
DZIP3	Q86Y13	ENSG00000198919	DAZ interacting zinc finger protein 3 [Source:HGNC Symbol;Acc:HGNC:30938]	TRUE	OID41137	NA	batch_2	NA	TRUE	FALSE
SPOUT1	Q5T280	ENSG00000198917	SPOUT domain containing methyltransferase 1 [Source:HGNC Symbol;Acc:HGNC:26933]	TRUE	OID41858	NA	batch_2	NA	TRUE	FALSE
L1CAM	P32004	ENSG00000198910	L1 cell adhesion molecule [Source:HGNC Symbol;Acc:HGNC:6470]	TRUE	OID44736	NA	batch_2	NA	TRUE	TRUE
MAP3K3	Q99759	ENSG00000198909	mitogen-activated protein kinase kinase kinase 3 [Source:HGNC Symbol;Acc:HGNC:6855]	TRUE	OID40390	NA	batch_2	NA	TRUE	FALSE
GPRASP3	Q6PI77	ENSG00000198908	G protein-coupled receptor associated sorting protein family member 3 [Source:HGNC Symbol;Acc:HGNC:29353]	TRUE	OID40863	NA	batch_2	NA	TRUE	FALSE
PRC1	O43663	ENSG00000198901	protein regulator of cytokinesis 1 [Source:HGNC Symbol;Acc:HGNC:9341]	TRUE	OID42937	NA	batch_2	NA	TRUE	FALSE
TOP1	P11387	ENSG00000198900	DNA topoisomerase I [Source:HGNC Symbol;Acc:HGNC:11986]	TRUE	OID44352	NA	batch_2	NA	TRUE	TRUE
CIPC	Q9C0C6	ENSG00000198894	CLOCK interacting pacemaker [Source:HGNC Symbol;Acc:HGNC:20365]	TRUE	OID40118	NA	batch_2	NA	TRUE	TRUE
SMC5	Q8IY18	ENSG00000198887	structural maintenance of chromosomes 5 [Source:HGNC Symbol;Acc:HGNC:20465]	TRUE	OID40604	NA	batch_2	NA	TRUE	FALSE
ITPRIPL1	Q6GPH6	ENSG00000198885	ITPRIP like 1 [Source:HGNC Symbol;Acc:HGNC:29371]	TRUE	OID41348	NA	batch_2	NA	TRUE	FALSE
PNMA5	Q96PV4	ENSG00000198883	PNMA family member 5 [Source:HGNC Symbol;Acc:HGNC:18743]	TRUE	OID40516	NA	batch_2	NA	TRUE	FALSE
DCAF12	Q5T6F0	ENSG00000198876	DDB1 and CUL4 associated factor 12 [Source:HGNC Symbol;Acc:HGNC:19911]	TRUE	OID40149	NA	batch_2	NA	TRUE	FALSE
TYW1	Q9NV66	ENSG00000198874	tRNA-yW synthesizing protein 1 homolog [Source:HGNC Symbol;Acc:HGNC:25598]	TRUE	OID41981	NA	batch_2	NA	TRUE	FALSE
GRK5	P34947	ENSG00000198873	G protein-coupled receptor kinase 5 [Source:HGNC Symbol;Acc:HGNC:4544]	TRUE	OID42537	OID20066	batch_1+2	MedianCentering	TRUE	FALSE
CD3E	P07766	ENSG00000198851	CD3 epsilon subunit of T-cell receptor complex [Source:HGNC Symbol;Acc:HGNC:1674]	TRUE	OID42243	NA	batch_2	NA	TRUE	FALSE
CES1	P23141	ENSG00000198848	carboxylesterase 1 [Source:HGNC Symbol;Acc:HGNC:1863]	TRUE	OID45068	OID20244	batch_1+2	QuantileSmoothing	TRUE	TRUE
TOX	O94900	ENSG00000198846	thymocyte selection associated high mobility group box [Source:HGNC Symbol;Acc:HGNC:18988]	TRUE	OID43215	NA	batch_2	NA	TRUE	FALSE
ARHGEF15	O94989	ENSG00000198844	Rho guanine nucleotide exchange factor 15 [Source:HGNC Symbol;Acc:HGNC:15590]	TRUE	OID40817	NA	batch_2	NA	TRUE	FALSE
ARHGAP11A	Q6P4F7	ENSG00000198826	Rho GTPase activating protein 11A [Source:HGNC Symbol;Acc:HGNC:15783]	TRUE	OID40811	NA	batch_2	NA	TRUE	FALSE
INPP5F	Q9Y2H2	ENSG00000198825	inositol polyphosphate-5-phosphatase F [Source:HGNC Symbol;Acc:HGNC:17054]	TRUE	OID40310	NA	batch_2	NA	TRUE	FALSE
CHAMP1	Q96JM3	ENSG00000198824	chromosome alignment maintaining phosphoprotein 1 [Source:HGNC Symbol;Acc:HGNC:20311]	TRUE	OID40114	NA	batch_2	NA	TRUE	FALSE
FOXJ3	Q9UPW0	ENSG00000198815	forkhead box J3 [Source:HGNC Symbol;Acc:HGNC:29178]	TRUE	OID42477	NA	batch_2	NA	TRUE	FALSE
PNP	P00491	ENSG00000198805	purine nucleoside phosphorylase [Source:HGNC Symbol;Acc:HGNC:7892]	TRUE	OID44860	NA	batch_2	NA	TRUE	TRUE
MAGEB3	O15480	ENSG00000198798	MAGE family member B3 [Source:HGNC Symbol;Acc:HGNC:6810]	TRUE	OID40385	NA	batch_2	NA	TRUE	FALSE
ALPK2	Q86TB3	ENSG00000198796	alpha kinase 2 [Source:HGNC Symbol;Acc:HGNC:20565]	TRUE	OID40011	NA	batch_2	NA	TRUE	FALSE
MUC2	Q02817	ENSG00000198788	mucin 2, oligomeric mucus/gel-forming [Source:HGNC Symbol;Acc:HGNC:7512]	TRUE	OID45192	NA	batch_2	NA	TRUE	TRUE
ZNF830	Q96NB3	ENSG00000198783	zinc finger protein 830 [Source:HGNC Symbol;Acc:HGNC:28291]	TRUE	OID43307	NA	batch_2	NA	TRUE	FALSE
RASSF9	O75901	ENSG00000198774	Ras association domain family member 9 [Source:HGNC Symbol;Acc:HGNC:15739]	TRUE	OID40551	NA	batch_2	NA	TRUE	FALSE
RCSD1	Q6JBY9	ENSG00000198771	RCSD domain containing 1 [Source:HGNC Symbol;Acc:HGNC:28310]	TRUE	OID41711	NA	batch_2	NA	TRUE	FALSE
EGFL6	Q8IUX8	ENSG00000198759	EGF like domain multiple 6 [Source:HGNC Symbol;Acc:HGNC:3235]	TRUE	OID44619	NA	batch_2	NA	TRUE	TRUE
PLXNB3	Q9ULL4	ENSG00000198753	plexin B3 [Source:HGNC Symbol;Acc:HGNC:9105]	TRUE	OID44857	OID20160	batch_1+2	QuantileSmoothing	TRUE	TRUE
CDC42BPB	Q9Y5S2	ENSG00000198752	CDC42 binding protein kinase beta [Source:HGNC Symbol;Acc:HGNC:1738]	TRUE	OID43505	NA	batch_2	NA	TRUE	TRUE
SMURF1	Q9HCE7	ENSG00000198742	SMAD specific E3 ubiquitin protein ligase 1 [Source:HGNC Symbol;Acc:HGNC:16807]	TRUE	OID41823	NA	batch_2	NA	TRUE	FALSE
SMOC1	Q9H4F8	ENSG00000198732	SPARC related modular calcium binding 1 [Source:HGNC Symbol;Acc:HGNC:20318]	TRUE	OID44262	NA	batch_2	NA	TRUE	TRUE
ECI2	O75521	ENSG00000198721	enoyl-CoA delta isomerase 2 [Source:HGNC Symbol;Acc:HGNC:14601]	TRUE	OID42393	NA	batch_2	NA	TRUE	FALSE
DLL1	O00548	ENSG00000198719	delta like canonical Notch ligand 1 [Source:HGNC Symbol;Acc:HGNC:2908]	TRUE	OID44605	NA	batch_2	NA	TRUE	TRUE
TOGARAM1	Q9Y4F4	ENSG00000198718	TOG array regulator of axonemal microtubules 1 [Source:HGNC Symbol;Acc:HGNC:19959]	TRUE	OID41941	NA	batch_2	NA	TRUE	FALSE
CEP290	O15078	ENSG00000198707	centrosomal protein 290 [Source:HGNC Symbol;Acc:HGNC:29021]	TRUE	OID42277	NA	batch_2	NA	TRUE	FALSE
MAGEA1	P43355	ENSG00000198681	MAGE family member A1 [Source:HGNC Symbol;Acc:HGNC:6796]	TRUE	OID40384	NA	batch_2	NA	TRUE	FALSE
STK39	Q9UEW8	ENSG00000198648	serine/threonine kinase 39 [Source:HGNC Symbol;Acc:HGNC:17717]	TRUE	OID41889	NA	batch_2	NA	TRUE	FALSE
FAM3D	Q96BQ1	ENSG00000198643	FAM3 metabolism regulating signaling molecule D [Source:HGNC Symbol;Acc:HGNC:18665]	TRUE	OID43701	NA	batch_2	NA	TRUE	TRUE
CCDC69	A6NI79	ENSG00000198624	coiled-coil domain containing 69 [Source:HGNC Symbol;Acc:HGNC:24487]	TRUE	OID40095	NA	batch_2	NA	TRUE	FALSE
AKR1C4	P17516	ENSG00000198610	aldo-keto reductase family 1 member C4 [Source:HGNC Symbol;Acc:HGNC:387]	TRUE	OID42105	NA	batch_2	NA	FALSE	FALSE
BAZ1A	Q9NRL2	ENSG00000198604	bromodomain adjacent to zinc finger domain 1A [Source:HGNC Symbol;Acc:HGNC:960]	TRUE	OID40050	NA	batch_2	NA	TRUE	FALSE
LRBA	P50851	ENSG00000198589	LPS responsive beige-like anchor protein [Source:HGNC Symbol;Acc:HGNC:1742]	TRUE	OID42700	NA	batch_2	NA	TRUE	FALSE
NUDT16	Q96DE0	ENSG00000198585	nudix hydrolase 16 [Source:HGNC Symbol;Acc:HGNC:26442]	TRUE	OID44049	NA	batch_2	NA	TRUE	TRUE
SLC34A3	Q8N130	ENSG00000198569	solute carrier family 34 member 3 [Source:HGNC Symbol;Acc:HGNC:20305]	TRUE	OID43093	NA	batch_2	NA	TRUE	FALSE
CTNND1	O60716	ENSG00000198561	catenin delta 1 [Source:HGNC Symbol;Acc:HGNC:2515]	TRUE	OID40139	NA	batch_2	NA	TRUE	FALSE
WDHD1	O75717	ENSG00000198554	WD repeat and HMG-box DNA binding protein 1 [Source:HGNC Symbol;Acc:HGNC:23170]	TRUE	OID42019	NA	batch_2	NA	TRUE	FALSE
KCNRG	Q8N5I3	ENSG00000198553	potassium channel regulator [Source:HGNC Symbol;Acc:HGNC:18893]	TRUE	OID41361	NA	batch_2	NA	TRUE	FALSE
ITGBL1	O95965	ENSG00000198542	integrin subunit beta like 1 [Source:HGNC Symbol;Acc:HGNC:6164]	TRUE	OID45167	NA	batch_2	NA	TRUE	TRUE
TMA16	Q96EY4	ENSG00000198498	translation machinery associated 16 homolog [Source:HGNC Symbol;Acc:HGNC:25638]	TRUE	OID43196	NA	batch_2	NA	TRUE	TRUE
ANKRD35	Q8N283	ENSG00000198483	ankyrin repeat domain 35 [Source:HGNC Symbol;Acc:HGNC:26323]	TRUE	OID42119	NA	batch_2	NA	TRUE	TRUE
SH3BGRL2	Q9UJC5	ENSG00000198478	SH3 domain binding glutamate rich protein like 2 [Source:HGNC Symbol;Acc:HGNC:15567]	TRUE	OID43069	NA	batch_2	NA	TRUE	FALSE
NRARP	Q7Z6K4	ENSG00000198435	NOTCH regulated ankyrin repeat protein [Source:HGNC Symbol;Acc:HGNC:33843]	TRUE	OID40466	NA	batch_2	NA	TRUE	FALSE
TXNRD1	Q16881	ENSG00000198431	thioredoxin reductase 1 [Source:HGNC Symbol;Acc:HGNC:12437]	TRUE	OID45292	NA	batch_2	NA	TRUE	TRUE
OGA	O60502	ENSG00000198408	O-GlcNAcase [Source:HGNC Symbol;Acc:HGNC:7056]	TRUE	OID44055	NA	batch_2	NA	TRUE	TRUE
NTRK1	P04629	ENSG00000198400	neurotrophic receptor tyrosine kinase 1 [Source:HGNC Symbol;Acc:HGNC:8031]	TRUE	OID41564	NA	batch_2	NA	TRUE	FALSE
WWP2	O00308	ENSG00000198373	WW domain containing E3 ubiquitin protein ligase 2 [Source:HGNC Symbol;Acc:HGNC:16804]	TRUE	OID44415	NA	batch_2	NA	TRUE	TRUE
SPRED2	Q7Z698	ENSG00000198369	sprouty related EVH1 domain containing 2 [Source:HGNC Symbol;Acc:HGNC:17722]	TRUE	OID43125	NA	batch_2	NA	TRUE	FALSE
GET3	O43681	ENSG00000198356	guided entry of tail-anchored proteins factor 3, ATPase [Source:HGNC Symbol;Acc:HGNC:752]	TRUE	OID44676	NA	batch_2	NA	TRUE	TRUE
MYL4	P12829	ENSG00000198336	myosin light chain 4 [Source:HGNC Symbol;Acc:HGNC:7585]	TRUE	OID44002	NA	batch_2	NA	TRUE	FALSE
HYLS1	Q96M11	ENSG00000198331	HYLS1 centriolar and ciliogenesis associated [Source:HGNC Symbol;Acc:HGNC:26558]	TRUE	OID40298	NA	batch_2	NA	TRUE	FALSE
SULT1C2	O00338	ENSG00000198203	sulfotransferase family 1C member 2 [Source:HGNC Symbol;Acc:HGNC:11456]	TRUE	OID40643	NA	batch_2	NA	TRUE	FALSE
CLEC4C	Q8WTT0	ENSG00000198178	C-type lectin domain family 4 member C [Source:HGNC Symbol;Acc:HGNC:13258]	TRUE	OID43535	OID20547	batch_1+2	QuantileSmoothing	TRUE	TRUE
MAN1A2	O60476	ENSG00000198162	mannosidase alpha class 1A member 2 [Source:HGNC Symbol;Acc:HGNC:6822]	TRUE	OID43954	NA	batch_2	NA	TRUE	TRUE
NPIPB6	E9PJ23	ENSG00000198156	nuclear pore complex interacting protein family member B6 [Source:HGNC Symbol;Acc:HGNC:37454]	TRUE	OID41555	NA	batch_2	NA	TRUE	TRUE
SOWAHC	Q53LP3	ENSG00000198142	sosondowah ankyrin repeat domain family member C [Source:HGNC Symbol;Acc:HGNC:26149]	TRUE	OID44275	NA	batch_2	NA	TRUE	TRUE
ADH4	P08319	ENSG00000198099	alcohol dehydrogenase 4 (class II), pi polypeptide [Source:HGNC Symbol;Acc:HGNC:252]	TRUE	OID40770	OID20117	batch_1+2	MedianCentering	TRUE	TRUE
ZNF649	Q9BS31	ENSG00000198093	zinc finger protein 649 [Source:HGNC Symbol;Acc:HGNC:25741]	TRUE	OID43305	NA	batch_2	NA	TRUE	FALSE
CD2AP	Q9Y5K6	ENSG00000198087	CD2 associated protein [Source:HGNC Symbol;Acc:HGNC:14258]	TRUE	OID44509	OID20177	batch_1+2	QuantileSmoothing	TRUE	TRUE
AKR1B10	O60218	ENSG00000198074	aldo-keto reductase family 1 member B10 [Source:HGNC Symbol;Acc:HGNC:382]	TRUE	OID42104	NA	batch_2	NA	TRUE	FALSE
PRIM1	P49642	ENSG00000198056	DNA primase subunit 1 [Source:HGNC Symbol;Acc:HGNC:9369]	TRUE	OID41665	NA	batch_2	NA	TRUE	FALSE
SIRPA	P78324	ENSG00000198053	signal regulatory protein alpha [Source:HGNC Symbol;Acc:HGNC:9662]	TRUE	OID45259	OID20304	batch_1+2	QuantileSmoothing	TRUE	TRUE
IRAK4	Q9NWZ3	ENSG00000198001	interleukin 1 receptor associated kinase 4 [Source:HGNC Symbol;Acc:HGNC:17967]	TRUE	OID43871	OID20577	batch_1+2	QuantileSmoothing	TRUE	TRUE
KEL	P23276	ENSG00000197993	Kell metallo-endopeptidase (Kell blood group) [Source:HGNC Symbol;Acc:HGNC:6308]	TRUE	OID43888	NA	batch_2	NA	TRUE	TRUE
LEKR1	Q6ZMV7	ENSG00000197980	leucine, glutamate and lysine rich 1 [Source:HGNC Symbol;Acc:HGNC:33765]	TRUE	OID42690	NA	batch_2	NA	TRUE	FALSE
DNM3	Q9UQ16	ENSG00000197959	dynamin 3 [Source:HGNC Symbol;Acc:HGNC:29125]	TRUE	OID43626	NA	batch_2	NA	TRUE	TRUE
FCHSD1	Q86WN1	ENSG00000197948	FCH and double SH3 domains 1 [Source:HGNC Symbol;Acc:HGNC:25463]	TRUE	OID41206	NA	batch_2	NA	TRUE	TRUE
IFNA1_IFNA13	P01562	ENSG00000197919, ENSG00000233816	interferon alpha 1 [Source:HGNC Symbol;Acc:HGNC:5417], interferon alpha 13 [Source:HGNC Symbol;Acc:HGNC:5419]	TRUE	OID41314	NA	batch_2	NA	TRUE	FALSE
NRAP	Q86VF7	ENSG00000197893	nebulin related anchoring protein [Source:HGNC Symbol;Acc:HGNC:7988]	TRUE	OID41558	NA	batch_2	NA	TRUE	FALSE
KIF13B	Q9NQT8	ENSG00000197892	kinesin family member 13B [Source:HGNC Symbol;Acc:HGNC:14405]	TRUE	OID40341	NA	batch_2	NA	TRUE	FALSE
NKIRAS1	Q9NYS0	ENSG00000197885	NFKB inhibitor interacting Ras like 1 [Source:HGNC Symbol;Acc:HGNC:17899]	TRUE	OID42835	NA	batch_2	NA	TRUE	FALSE
ADAMTSL2	Q86TH1	ENSG00000197859	ADAMTS like 2 [Source:HGNC Symbol;Acc:HGNC:14631]	TRUE	OID45024	NA	batch_2	NA	TRUE	TRUE
CFAP299	Q6V702	ENSG00000197826	cilia and flagella associated protein 299 [Source:HGNC Symbol;Acc:HGNC:28554]	TRUE	OID41001	NA	batch_2	NA	TRUE	TRUE
OCLN	Q16625	ENSG00000197822	occludin [Source:HGNC Symbol;Acc:HGNC:8104]	TRUE	OID44054	NA	batch_2	NA	TRUE	TRUE
MCMBP	Q9BTE3	ENSG00000197771	minichromosome maintenance complex binding protein [Source:HGNC Symbol;Acc:HGNC:25782]	TRUE	OID40402	NA	batch_2	NA	TRUE	TRUE
CFD	P00746	ENSG00000197766	complement factor D [Source:HGNC Symbol;Acc:HGNC:2771]	TRUE	OID45452	NA	batch_2	NA	TRUE	TRUE
CFAP43	Q8NDM7	ENSG00000197748	cilia and flagella associated protein 43 [Source:HGNC Symbol;Acc:HGNC:26684]	TRUE	OID40110	NA	batch_2	NA	TRUE	TRUE
PSAP	P07602	ENSG00000197746	prosaposin [Source:HGNC Symbol;Acc:HGNC:9498]	TRUE	OID45239	NA	batch_2	NA	TRUE	TRUE
RPE	Q96AT9	ENSG00000197713	ribulose-5-phosphate-3-epimerase [Source:HGNC Symbol;Acc:HGNC:10293]	TRUE	OID43027	NA	batch_2	NA	TRUE	TRUE
FAM114A1	Q8IWE2	ENSG00000197712	family with sequence similarity 114 member A1 [Source:HGNC Symbol;Acc:HGNC:25087]	TRUE	OID42438	NA	batch_2	NA	TRUE	TRUE
DNAH10	Q8IVF4	ENSG00000197653	dynein axonemal heavy chain 10 [Source:HGNC Symbol;Acc:HGNC:2941]	TRUE	OID41108	NA	batch_2	NA	TRUE	FALSE
PDCD1LG2	Q9BQ51	ENSG00000197646	programmed cell death 1 ligand 2 [Source:HGNC Symbol;Acc:HGNC:18731]	TRUE	OID44083	NA	batch_2	NA	TRUE	TRUE
DPP4	P27487	ENSG00000197635	dipeptidyl peptidase 4 [Source:HGNC Symbol;Acc:HGNC:3009]	TRUE	OID45351	OID20406	batch_1+2	MedianCentering	TRUE	TRUE
MFAP5	Q13361	ENSG00000197614	microfibril associated protein 5 [Source:HGNC Symbol;Acc:HGNC:29673]	TRUE	OID45184	OID20239	batch_1+2	QuantileSmoothing	TRUE	TRUE
ENPP1	P22413	ENSG00000197594	ectonucleotide pyrophosphatase/phosphodiesterase 1 [Source:HGNC Symbol;Acc:HGNC:3356]	TRUE	OID44626	NA	batch_2	NA	TRUE	TRUE
KLKP1	Q107X0	ENSG00000197588	kallikrein pseudogene 1 [Source:HGNC Symbol;Acc:HGNC:21260]	TRUE	OID41393	NA	batch_2	NA	TRUE	FALSE
ENTPD6	O75354	ENSG00000197586	ectonucleoside triphosphate diphosphohydrolase 6 [Source:HGNC Symbol;Acc:HGNC:3368]	TRUE	OID43678	OID20100	batch_1+2	QuantileSmoothing	TRUE	TRUE
COL4A6	Q14031	ENSG00000197565	collagen type IV alpha 6 chain [Source:HGNC Symbol;Acc:HGNC:2208]	TRUE	OID40125	NA	batch_2	NA	TRUE	FALSE
ELANE	P08246	ENSG00000197561	elastase, neutrophil expressed [Source:HGNC Symbol;Acc:HGNC:3309]	TRUE	OID45353	NA	batch_2	NA	TRUE	FALSE
MYO5A	Q9Y4I1	ENSG00000197535	myosin VA [Source:HGNC Symbol;Acc:HGNC:7602]	TRUE	OID41511	NA	batch_2	NA	TRUE	FALSE
MIB2	Q96AX9	ENSG00000197530	MIB E3 ubiquitin protein ligase 2 [Source:HGNC Symbol;Acc:HGNC:30577]	TRUE	OID42756	NA	batch_2	NA	TRUE	FALSE
FAM177B	A6PVY3	ENSG00000197520	family with sequence similarity 177 member B [Source:HGNC Symbol;Acc:HGNC:34395]	TRUE	OID40222	NA	batch_2	NA	TRUE	FALSE
SPN	P16150	ENSG00000197471	sialophorin [Source:HGNC Symbol;Acc:HGNC:11249]	TRUE	OID41857	NA	batch_2	NA	TRUE	TRUE
PDGFA	P04085	ENSG00000197461	platelet derived growth factor subunit A [Source:HGNC Symbol;Acc:HGNC:8799]	TRUE	OID45212	OID20313	batch_1+2	QuantileSmoothing	TRUE	TRUE
MAP3K5	Q99683	ENSG00000197442	mitogen-activated protein kinase kinase kinase 5 [Source:HGNC Symbol;Acc:HGNC:6857]	TRUE	OID42736	NA	batch_2	NA	TRUE	FALSE
SHPK	Q9UHJ6	ENSG00000197417	sedoheptulokinase [Source:HGNC Symbol;Acc:HGNC:1492]	TRUE	OID43077	NA	batch_2	NA	TRUE	TRUE
PELI1	Q96FA3	ENSG00000197329	pellino E3 ubiquitin protein ligase 1 [Source:HGNC Symbol;Acc:HGNC:8827]	TRUE	OID40498	NA	batch_2	NA	TRUE	FALSE
DDI2	Q5TDH0	ENSG00000197312	DNA damage inducible 1 homolog 2 [Source:HGNC Symbol;Acc:HGNC:24578]	TRUE	OID44599	NA	batch_2	NA	TRUE	FALSE
BLM	P54132	ENSG00000197299	BLM RecQ like helicase [Source:HGNC Symbol;Acc:HGNC:1058]	TRUE	OID40060	NA	batch_2	NA	TRUE	FALSE
SYNGAP1	Q96PV0	ENSG00000197283	synaptic Ras GTPase activating protein 1 [Source:HGNC Symbol;Acc:HGNC:11497]	TRUE	OID43152	NA	batch_2	NA	TRUE	FALSE
GUCA2A	Q02747	ENSG00000197273	guanylate cyclase activator 2A [Source:HGNC Symbol;Acc:HGNC:4682]	TRUE	OID45138	NA	batch_2	NA	TRUE	TRUE
KANK2	Q63ZY3	ENSG00000197256	KN motif and ankyrin repeat domains 2 [Source:HGNC Symbol;Acc:HGNC:29300]	TRUE	OID42649	NA	batch_2	NA	TRUE	TRUE
ENTPD4	Q9Y227	ENSG00000197217	ectonucleoside triphosphate diphosphohydrolase 4 [Source:HGNC Symbol;Acc:HGNC:14573]	TRUE	OID41162	NA	batch_2	NA	TRUE	FALSE
CYSRT1	A8MQ03	ENSG00000197191	cysteine rich tail 1 [Source:HGNC Symbol;Acc:HGNC:30529]	TRUE	OID40146	NA	batch_2	NA	TRUE	FALSE
NOL4L	Q96MY1	ENSG00000197183	nucleolar protein 4 like [Source:HGNC Symbol;Acc:HGNC:16106]	TRUE	OID40463	NA	batch_2	NA	TRUE	TRUE
NEK5	Q6P3R8	ENSG00000197168	NIMA related kinase 5 [Source:HGNC Symbol;Acc:HGNC:7748]	TRUE	OID40454	NA	batch_2	NA	TRUE	FALSE
SRC	P12931	ENSG00000197122	SRC proto-oncogene, non-receptor tyrosine kinase [Source:HGNC Symbol;Acc:HGNC:11283]	TRUE	OID44958	NA	batch_2	NA	TRUE	TRUE
PCBP2	Q15366	ENSG00000197111	poly(rC) binding protein 2 [Source:HGNC Symbol;Acc:HGNC:8648]	TRUE	OID44075	NA	batch_2	NA	TRUE	TRUE
DYNC1H1	Q14204	ENSG00000197102	dynein cytoplasmic 1 heavy chain 1 [Source:HGNC Symbol;Acc:HGNC:2961]	TRUE	OID42391	NA	batch_2	NA	TRUE	FALSE
IGF2R	P11717	ENSG00000197081	insulin like growth factor 2 receptor [Source:HGNC Symbol;Acc:HGNC:5467]	TRUE	OID45150	NA	batch_2	NA	TRUE	TRUE
DTHD1	Q6ZMT9	ENSG00000197057	death domain containing 1 [Source:HGNC Symbol;Acc:HGNC:37261]	TRUE	OID40178	NA	batch_2	NA	TRUE	FALSE
SIGLEC15	Q6ZMC9	ENSG00000197046	sialic acid binding Ig like lectin 15 [Source:HGNC Symbol;Acc:HGNC:27596]	TRUE	OID43079	NA	batch_2	NA	TRUE	TRUE
ANXA6	P08133	ENSG00000197043	annexin A6 [Source:HGNC Symbol;Acc:HGNC:544]	TRUE	OID40805	NA	batch_2	NA	TRUE	FALSE
SERTAD1	Q9UHV2	ENSG00000197019	SERTA domain containing 1 [Source:HGNC Symbol;Acc:HGNC:17932]	TRUE	OID41784	NA	batch_2	NA	TRUE	FALSE
ANXA4	P09525	ENSG00000196975	annexin A4 [Source:HGNC Symbol;Acc:HGNC:542]	TRUE	OID44465	OID20123	batch_1+2	QuantileSmoothing	TRUE	TRUE
CASP4	P49662	ENSG00000196954	caspase 4 [Source:HGNC Symbol;Acc:HGNC:1505]	TRUE	OID42225	NA	batch_2	NA	TRUE	TRUE
FAM3C	Q92520	ENSG00000196937	FAM3 metabolism regulating signaling molecule C [Source:HGNC Symbol;Acc:HGNC:18664]	TRUE	OID44647	OID20233	batch_1+2	MedianCentering	TRUE	TRUE
PDLIM7	Q9NR12	ENSG00000196923	PDZ and LIM domain 7 [Source:HGNC Symbol;Acc:HGNC:22958]	TRUE	OID44843	OID20729	batch_1+2	MedianCentering	TRUE	TRUE
ARHGEF12	Q9NZN5	ENSG00000196914	Rho guanine nucleotide exchange factor 12 [Source:HGNC Symbol;Acc:HGNC:14193]	TRUE	OID43384	OID20554	batch_1+2	MedianCentering	TRUE	TRUE
ANKRD36B	Q8N2N9	ENSG00000196912	ankyrin repeat domain 36B [Source:HGNC Symbol;Acc:HGNC:29333]	TRUE	OID40798	NA	batch_2	NA	TRUE	FALSE
CRACDL	Q6NV74	ENSG00000196872	CRACD like [Source:HGNC Symbol;Acc:HGNC:33454]	TRUE	OID41051	NA	batch_2	NA	TRUE	TRUE
ARID5A	Q03989	ENSG00000196843	AT-rich interaction domain 5A [Source:HGNC Symbol;Acc:HGNC:17361]	TRUE	OID40822	NA	batch_2	NA	TRUE	FALSE
ADA	P00813	ENSG00000196839	adenosine deaminase [Source:HGNC Symbol;Acc:HGNC:186]	TRUE	OID43326	OID20645	batch_1+2	QuantileSmoothing	TRUE	TRUE
GM2A	P17900	ENSG00000196743	ganglioside GM2 activator [Source:HGNC Symbol;Acc:HGNC:4367]	TRUE	OID45133	NA	batch_2	NA	TRUE	TRUE
TRPV1	Q8NER1	ENSG00000196689	transient receptor potential cation channel subfamily V member 1 [Source:HGNC Symbol;Acc:HGNC:12716]	TRUE	OID41960	NA	batch_2	NA	TRUE	FALSE
HSH2D	Q96JZ2	ENSG00000196684	hematopoietic SH2 domain containing [Source:HGNC Symbol;Acc:HGNC:24920]	TRUE	OID41305	NA	batch_2	NA	TRUE	FALSE
ERI2	A8K979	ENSG00000196678	ERI1 exoribonuclease family member 2 [Source:HGNC Symbol;Acc:HGNC:30541]	TRUE	OID40206	NA	batch_2	NA	TRUE	TRUE
TRAPPC4	Q9Y296	ENSG00000196655	trafficking protein particle complex subunit 4 [Source:HGNC Symbol;Acc:HGNC:19943]	TRUE	OID43235	NA	batch_2	NA	TRUE	FALSE
HRH1	P35367	ENSG00000196639	histamine receptor H1 [Source:HGNC Symbol;Acc:HGNC:5182]	TRUE	OID41303	NA	batch_2	NA	TRUE	TRUE
SDHAF3	Q9NRP4	ENSG00000196636	succinate dehydrogenase complex assembly factor 3 [Source:HGNC Symbol;Acc:HGNC:21752]	TRUE	OID41772	NA	batch_2	NA	TRUE	FALSE
WNK3	Q9BYP7	ENSG00000196632	WNK lysine deficient protein kinase 3 [Source:HGNC Symbol;Acc:HGNC:14543]	TRUE	OID42025	NA	batch_2	NA	TRUE	FALSE
ADH1B	P00325	ENSG00000196616	alcohol dehydrogenase 1B (class I), beta polypeptide [Source:HGNC Symbol;Acc:HGNC:250]	TRUE	OID44448	NA	batch_2	NA	TRUE	FALSE
MMP1	P03956	ENSG00000196611	matrix metallopeptidase 1 [Source:HGNC Symbol;Acc:HGNC:7155]	TRUE	OID44783	OID20672	batch_1+2	QuantileSmoothing	TRUE	TRUE
MRTFA	Q969V6	ENSG00000196588	myocardin related transcription factor A [Source:HGNC Symbol;Acc:HGNC:14334]	TRUE	OID42779	NA	batch_2	NA	TRUE	TRUE
MYO6	Q9UM54	ENSG00000196586	myosin VI [Source:HGNC Symbol;Acc:HGNC:7605]	TRUE	OID42796	NA	batch_2	NA	TRUE	FALSE
XRCC2	O43543	ENSG00000196584	X-ray repair cross complementing 2 [Source:HGNC Symbol;Acc:HGNC:12829]	TRUE	OID42033	NA	batch_2	NA	TRUE	FALSE
PLXNB2	O15031	ENSG00000196576	plexin B2 [Source:HGNC Symbol;Acc:HGNC:9104]	TRUE	OID45229	OID20317	batch_1+2	QuantileSmoothing	TRUE	TRUE
HBG2	P69892	ENSG00000196565	hemoglobin subunit gamma 2 [Source:HGNC Symbol;Acc:HGNC:4832]	TRUE	OID41280	NA	batch_2	NA	TRUE	FALSE
SULF2	Q8IWU5	ENSG00000196562	sulfatase 2 [Source:HGNC Symbol;Acc:HGNC:20392]	TRUE	OID41895	NA	batch_2	NA	TRUE	FALSE
CACNA1H	O95180	ENSG00000196557	calcium voltage-gated channel subunit alpha1 H [Source:HGNC Symbol;Acc:HGNC:1395]	TRUE	OID42211	NA	batch_2	NA	TRUE	FALSE
FAM72A	Q5TYM5	ENSG00000196550	family with sequence similarity 72 member A [Source:HGNC Symbol;Acc:HGNC:24044]	TRUE	OID41195	NA	batch_2	NA	TRUE	TRUE
MME	P08473	ENSG00000196549	membrane metalloendopeptidase [Source:HGNC Symbol;Acc:HGNC:7154]	TRUE	OID43979	NA	batch_2	NA	TRUE	TRUE
AFAP1	Q8N556	ENSG00000196526	actin filament associated protein 1 [Source:HGNC Symbol;Acc:HGNC:24017]	TRUE	OID44450	NA	batch_2	NA	TRUE	TRUE
TPK1	Q9H3S4	ENSG00000196511	thiamin pyrophosphokinase 1 [Source:HGNC Symbol;Acc:HGNC:17358]	TRUE	OID44997	NA	batch_2	NA	TRUE	TRUE
GDAP2	Q9NXN4	ENSG00000196505	ganglioside induced differentiation associated protein 2 [Source:HGNC Symbol;Acc:HGNC:18010]	TRUE	OID41244	NA	batch_2	NA	TRUE	FALSE
SULT1A1	P50225	ENSG00000196502	sulfotransferase family 1A member 1 [Source:HGNC Symbol;Acc:HGNC:11453]	TRUE	OID44965	NA	batch_2	NA	TRUE	TRUE
FGF16	O43320	ENSG00000196468	fibroblast growth factor 16 [Source:HGNC Symbol;Acc:HGNC:3672]	TRUE	OID43708	NA	batch_2	NA	TRUE	FALSE
MYL6B	P14649	ENSG00000196465	myosin light chain 6B [Source:HGNC Symbol;Acc:HGNC:29823]	TRUE	OID42795	NA	batch_2	NA	TRUE	TRUE
S100A5	P33763	ENSG00000196420	S100 calcium binding protein A5 [Source:HGNC Symbol;Acc:HGNC:10495]	TRUE	OID41761	NA	batch_2	NA	TRUE	FALSE
PRTN3	P24158	ENSG00000196415	proteinase 3 [Source:HGNC Symbol;Acc:HGNC:9495]	TRUE	OID45238	OID20329	batch_1+2	QuantileSmoothing	TRUE	TRUE
EPHB4	P54760	ENSG00000196411	EPH receptor B4 [Source:HGNC Symbol;Acc:HGNC:3395]	TRUE	OID45118	OID20242	batch_1+2	QuantileSmoothing	TRUE	TRUE
EVL	Q9UI08	ENSG00000196405	Enah/Vasp-like [Source:HGNC Symbol;Acc:HGNC:20234]	TRUE	OID40208	NA	batch_2	NA	TRUE	FALSE
PTPN1	P18031	ENSG00000196396	protein tyrosine phosphatase non-receptor type 1 [Source:HGNC Symbol;Acc:HGNC:9642]	TRUE	OID44148	NA	batch_2	NA	TRUE	TRUE
SRGAP2B	P0DMP2	ENSG00000196369	SLIT-ROBO Rho GTPase activating protein 2B [Source:HGNC Symbol;Acc:HGNC:35237]	TRUE	OID40622	NA	batch_2	NA	TRUE	FALSE
LONP1	P36776	ENSG00000196365	lon peptidase 1, mitochondrial [Source:HGNC Symbol;Acc:HGNC:9479]	TRUE	OID43928	NA	batch_2	NA	TRUE	TRUE
ELAVL3	Q14576	ENSG00000196361	ELAV like RNA binding protein 3 [Source:HGNC Symbol;Acc:HGNC:3314]	TRUE	OID41155	NA	batch_2	NA	TRUE	FALSE
NTNG2	Q96CW9	ENSG00000196358	netrin G2 [Source:HGNC Symbol;Acc:HGNC:14288]	TRUE	OID42857	NA	batch_2	NA	TRUE	FALSE
CD55	P08174	ENSG00000196352	CD55 molecule (Cromer blood group) [Source:HGNC Symbol;Acc:HGNC:2665]	TRUE	OID45330	OID20377	batch_1+2	QuantileSmoothing	TRUE	TRUE
ZBTB44	Q8NCP5	ENSG00000196323	zinc finger and BTB domain containing 44 [Source:HGNC Symbol;Acc:HGNC:25001]	TRUE	OID40725	NA	batch_2	NA	TRUE	FALSE
GTF2IRD2	Q86UP8	ENSG00000196275	GTF2I repeat domain containing 2 [Source:HGNC Symbol;Acc:HGNC:30775]	TRUE	OID41271	NA	batch_2	NA	TRUE	FALSE
SRGAP3	O43295	ENSG00000196220	SLIT-ROBO Rho GTPase activating protein 3 [Source:HGNC Symbol;Acc:HGNC:19744]	TRUE	OID41864	NA	batch_2	NA	TRUE	TRUE
RYR1	P21817	ENSG00000196218	ryanodine receptor 1 [Source:HGNC Symbol;Acc:HGNC:10483]	TRUE	OID43040	NA	batch_2	NA	TRUE	FALSE
MPHOSPH8	Q99549	ENSG00000196199	M-phase phosphoprotein 8 [Source:HGNC Symbol;Acc:HGNC:29810]	TRUE	OID43983	OID20092	batch_1+2	MedianCentering	TRUE	TRUE
CTSE	P14091	ENSG00000196188	cathepsin E [Source:HGNC Symbol;Acc:HGNC:2530]	TRUE	OID44579	NA	batch_2	NA	TRUE	TRUE
ACADSB	P45954	ENSG00000196177	acyl-CoA dehydrogenase short/branched chain [Source:HGNC Symbol;Acc:HGNC:91]	TRUE	OID44433	NA	batch_2	NA	TRUE	TRUE
KIF19	Q2TAC6	ENSG00000196169	kinesin family member 19 [Source:HGNC Symbol;Acc:HGNC:26735]	TRUE	OID41375	NA	batch_2	NA	TRUE	FALSE
FAT4	Q6V0I7	ENSG00000196159	FAT atypical cadherin 4 [Source:HGNC Symbol;Acc:HGNC:23109]	TRUE	OID41200	NA	batch_2	NA	TRUE	TRUE
S100A4	P26447	ENSG00000196154	S100 calcium binding protein A4 [Source:HGNC Symbol;Acc:HGNC:10494]	TRUE	OID44905	NA	batch_2	NA	TRUE	TRUE
SERPINA3	P01011	ENSG00000196136	serpin family A member 3 [Source:HGNC Symbol;Acc:HGNC:16]	TRUE	OID45490	NA	batch_2	NA	TRUE	TRUE
MYBPC1	Q00872	ENSG00000196091	myosin binding protein C1 [Source:HGNC Symbol;Acc:HGNC:7549]	TRUE	OID44796	NA	batch_2	NA	TRUE	TRUE
IL1RAP	Q9NPH3	ENSG00000196083	interleukin 1 receptor accessory protein [Source:HGNC Symbol;Acc:HGNC:5995]	TRUE	OID45157	NA	batch_2	NA	TRUE	TRUE
BLOC1S2	Q6QNY1	ENSG00000196072	biogenesis of lysosomal organelles complex 1 subunit 2 [Source:HGNC Symbol;Acc:HGNC:20984]	TRUE	OID42187	NA	batch_2	NA	TRUE	FALSE
RASSF10	A6NK89	ENSG00000189431	Ras association domain family member 10 [Source:HGNC Symbol;Acc:HGNC:33984]	TRUE	OID41701	NA	batch_2	NA	TRUE	FALSE
NCR1	O76036	ENSG00000189430	natural cytotoxicity triggering receptor 1 [Source:HGNC Symbol;Acc:HGNC:6731]	TRUE	OID44014	OID20566	batch_1+2	MedianCentering	TRUE	TRUE
OTUD6A	Q7L8S5	ENSG00000189401	OTU deubiquitinase 6A [Source:HGNC Symbol;Acc:HGNC:32312]	TRUE	OID40482	NA	batch_2	NA	TRUE	FALSE
CXCL17	Q6UXB2	ENSG00000189377	C-X-C motif chemokine ligand 17 [Source:HGNC Symbol;Acc:HGNC:19232]	TRUE	OID43585	OID20622	batch_1+2	QuantileSmoothing	TRUE	TRUE
TBC1D28	Q2M2D7	ENSG00000189375	TBC1 domain family member 28 [Source:HGNC Symbol;Acc:HGNC:26858]	TRUE	OID41912	NA	batch_2	NA	TRUE	FALSE
KIAA0408	Q6ZU52	ENSG00000189367	KIAA0408 [Source:HGNC Symbol;Acc:HGNC:21636]	TRUE	OID41369	NA	batch_2	NA	TRUE	FALSE
TOGARAM2	Q6ZUX3	ENSG00000189350	TOG array regulator of axonemal microtubules 2 [Source:HGNC Symbol;Acc:HGNC:33715]	TRUE	OID43212	NA	batch_2	NA	TRUE	TRUE
KAZN	Q674X7	ENSG00000189337	kazrin, periplakin interacting protein [Source:HGNC Symbol;Acc:HGNC:29173]	TRUE	OID43886	NA	batch_2	NA	TRUE	FALSE
S100A14	Q9HCY8	ENSG00000189334	S100 calcium binding protein A14 [Source:HGNC Symbol;Acc:HGNC:18901]	TRUE	OID43041	NA	batch_2	NA	TRUE	FALSE
BNIP5	P0C671	ENSG00000189325	BCL2 interacting protein 5 [Source:HGNC Symbol;Acc:HGNC:33769]	TRUE	OID40868	NA	batch_2	NA	TRUE	FALSE
ZKSCAN3	Q9BRR0	ENSG00000189298	zinc finger with KRAB and SCAN domains 3 [Source:HGNC Symbol;Acc:HGNC:13853]	TRUE	OID43299	NA	batch_2	NA	TRUE	FALSE
FHIT	P49789	ENSG00000189283	fragile histidine triad diadenosine triphosphatase [Source:HGNC Symbol;Acc:HGNC:3701]	TRUE	OID42464	NA	batch_2	NA	TRUE	TRUE
TSPYL1	Q9H0U9	ENSG00000189241	TSPY like 1 [Source:HGNC Symbol;Acc:HGNC:12382]	TRUE	OID44367	NA	batch_2	NA	TRUE	FALSE
BTBD8	Q5XKL5	ENSG00000189195	BTB domain containing 8 [Source:HGNC Symbol;Acc:HGNC:21019]	TRUE	OID40876	NA	batch_2	NA	TRUE	FALSE
S100A13	Q99584	ENSG00000189171	S100 calcium binding protein A13 [Source:HGNC Symbol;Acc:HGNC:10490]	TRUE	OID44200	NA	batch_2	NA	TRUE	TRUE
FAM47B	Q8NA70	ENSG00000189132	family with sequence similarity 47 member B [Source:HGNC Symbol;Acc:HGNC:26659]	TRUE	OID41194	NA	batch_2	NA	TRUE	FALSE
ANKRD34B	A5PLL1	ENSG00000189127	ankyrin repeat domain 34B [Source:HGNC Symbol;Acc:HGNC:33736]	TRUE	OID40017	NA	batch_2	NA	TRUE	FALSE
BLOC1S3	Q6QNY0	ENSG00000189114	biogenesis of lysosomal organelles complex 1 subunit 3 [Source:HGNC Symbol;Acc:HGNC:20914]	TRUE	OID43415	NA	batch_2	NA	TRUE	TRUE
SF3B3	Q15393	ENSG00000189091	splicing factor 3b subunit 3 [Source:HGNC Symbol;Acc:HGNC:10770]	TRUE	OID40595	NA	batch_2	NA	TRUE	FALSE
VSTM1	Q6UX27	ENSG00000189068	V-set and transmembrane domain containing 1 [Source:HGNC Symbol;Acc:HGNC:29455]	TRUE	OID43279	NA	batch_2	NA	TRUE	FALSE
GAGE2A	Q6NT46	ENSG00000189064	G antigen 2A [Source:HGNC Symbol;Acc:HGNC:4099]	TRUE	OID42492	NA	batch_2	NA	TRUE	FALSE
APOD	P05090	ENSG00000189058	apolipoprotein D [Source:HGNC Symbol;Acc:HGNC:612]	TRUE	OID45438	NA	batch_2	NA	TRUE	TRUE
FAM111B	Q6SJ93	ENSG00000189057	FAM111 trypsin like peptidase B [Source:HGNC Symbol;Acc:HGNC:24200]	TRUE	OID40215	NA	batch_2	NA	TRUE	TRUE
SBSN	Q6UWP8	ENSG00000189001	suprabasin [Source:HGNC Symbol;Acc:HGNC:24950]	TRUE	OID45249	NA	batch_2	NA	TRUE	TRUE
C9orf152	Q5JTZ5	ENSG00000188959	chromosome 9 open reading frame 152 [Source:HGNC Symbol;Acc:HGNC:31455]	TRUE	OID40915	NA	batch_2	NA	TRUE	TRUE
CFAP126	Q5VTH2	ENSG00000188931	cilia and flagella associated protein 126 [Source:HGNC Symbol;Acc:HGNC:32325]	TRUE	OID40108	NA	batch_2	NA	TRUE	FALSE
INSYN2A	Q6ZSG2	ENSG00000188916	inhibitory synaptic factor 2A [Source:HGNC Symbol;Acc:HGNC:33859]	TRUE	OID41331	NA	batch_2	NA	TRUE	FALSE
POTEA	Q6S8J7	ENSG00000188877	POTE ankyrin domain family member A (gene/pseudogene) [Source:HGNC Symbol;Acc:HGNC:33893]	TRUE	OID41644	NA	batch_2	NA	TRUE	FALSE
BEND4	Q6ZU67	ENSG00000188848	BEN domain containing 4 [Source:HGNC Symbol;Acc:HGNC:23815]	TRUE	OID40859	NA	batch_2	NA	TRUE	TRUE
RPL14	P50914	ENSG00000188846	ribosomal protein L14 [Source:HGNC Symbol;Acc:HGNC:10305]	TRUE	OID44193	NA	batch_2	NA	TRUE	TRUE
SNTN	A6NMZ2	ENSG00000188817	sentan, cilia apical structure protein [Source:HGNC Symbol;Acc:HGNC:33706]	TRUE	OID40610	NA	batch_2	NA	TRUE	FALSE
NHLRC3	Q5JS37	ENSG00000188811	NHL repeat containing 3 [Source:HGNC Symbol;Acc:HGNC:33751]	TRUE	OID44811	NA	batch_2	NA	TRUE	TRUE
MTF1	Q14872	ENSG00000188786	metal regulatory transcription factor 1 [Source:HGNC Symbol;Acc:HGNC:7428]	TRUE	OID41497	NA	batch_2	NA	TRUE	FALSE
PRELP	P51888	ENSG00000188783	proline and arginine rich end leucine rich repeat protein [Source:HGNC Symbol;Acc:HGNC:9357]	TRUE	OID44868	OID20766	batch_1+2	QuantileSmoothing	TRUE	TRUE
SKOR1	P84550	ENSG00000188779	SKI family transcriptional corepressor 1 [Source:HGNC Symbol;Acc:HGNC:21326]	TRUE	OID41809	NA	batch_2	NA	TRUE	FALSE
OPTC	Q9UBM4	ENSG00000188770	opticin [Source:HGNC Symbol;Acc:HGNC:8158]	TRUE	OID44060	NA	batch_2	NA	TRUE	FALSE
FZD9	O00144	ENSG00000188763	frizzled class receptor 9 [Source:HGNC Symbol;Acc:HGNC:4047]	TRUE	OID40258	NA	batch_2	NA	TRUE	FALSE
BCL2L15	Q5TBC7	ENSG00000188761	BCL2 like 15 [Source:HGNC Symbol;Acc:HGNC:33624]	TRUE	OID42177	NA	batch_2	NA	TRUE	TRUE
FSIP2	Q5CZC0	ENSG00000188738	fibrous sheath interacting protein 2 [Source:HGNC Symbol;Acc:HGNC:21675]	TRUE	OID40256	NA	batch_2	NA	TRUE	TRUE
FAM221A	A4D161	ENSG00000188732	family with sequence similarity 221 member A [Source:HGNC Symbol;Acc:HGNC:27977]	TRUE	OID42441	NA	batch_2	NA	TRUE	TRUE
VWC2	Q2TAL6	ENSG00000188730	von Willebrand factor C domain containing 2 [Source:HGNC Symbol;Acc:HGNC:30200]	TRUE	OID44403	NA	batch_2	NA	TRUE	TRUE
OSTN	P61366	ENSG00000188729	osteocrin [Source:HGNC Symbol;Acc:HGNC:29961]	TRUE	OID42868	NA	batch_2	NA	TRUE	FALSE
DUSP29	Q68J44	ENSG00000188716	dual specificity phosphatase 29 [Source:HGNC Symbol;Acc:HGNC:23481]	TRUE	OID42389	NA	batch_2	NA	TRUE	FALSE
UROS	P10746	ENSG00000188690	uroporphyrinogen III synthase [Source:HGNC Symbol;Acc:HGNC:12592]	TRUE	OID44380	NA	batch_2	NA	TRUE	TRUE
C2orf80	Q0P641	ENSG00000188674	chromosome 2 open reading frame 80 [Source:HGNC Symbol;Acc:HGNC:34352]	TRUE	OID40898	NA	batch_2	NA	TRUE	FALSE
RNASE9	P60153	ENSG00000188655	ribonuclease A family member 9 (inactive) [Source:HGNC Symbol;Acc:HGNC:20673]	TRUE	OID41730	NA	batch_2	NA	TRUE	FALSE
S100A16	Q96FQ6	ENSG00000188643	S100 calcium binding protein A16 [Source:HGNC Symbol;Acc:HGNC:20441]	TRUE	OID44201	NA	batch_2	NA	TRUE	TRUE
IGFL3	Q6UXB1	ENSG00000188624	IGF like family member 3 [Source:HGNC Symbol;Acc:HGNC:32930]	TRUE	OID44711	NA	batch_2	NA	TRUE	TRUE
ASAH2	Q9NR71	ENSG00000188611	N-acylsphingosine amidohydrolase 2 [Source:HGNC Symbol;Acc:HGNC:18860]	TRUE	OID43387	NA	batch_2	NA	TRUE	TRUE
NDOR1	Q9UHB4	ENSG00000188566	NADPH dependent diflavin oxidoreductase 1 [Source:HGNC Symbol;Acc:HGNC:29838]	TRUE	OID40449	NA	batch_2	NA	TRUE	FALSE
RALGAPA2	Q2PPJ7	ENSG00000188559	Ral GTPase activating protein catalytic subunit alpha 2 [Source:HGNC Symbol;Acc:HGNC:16207]	TRUE	OID40545	NA	batch_2	NA	TRUE	TRUE
NCCRP1	Q6ZVX7	ENSG00000188505	NCCRP1, F-box associated domain containing [Source:HGNC Symbol;Acc:HGNC:33739]	TRUE	OID42810	NA	batch_2	NA	TRUE	FALSE
LCTL	Q6UWM7	ENSG00000188501	lactase like [Source:HGNC Symbol;Acc:HGNC:15583]	TRUE	OID40362	NA	batch_2	NA	TRUE	FALSE
SERPINA5	P05154	ENSG00000188488	serpin family A member 5 [Source:HGNC Symbol;Acc:HGNC:8723]	TRUE	OID45492	NA	batch_2	NA	TRUE	FALSE
BLOC1S5	Q8TDH9	ENSG00000188428	biogenesis of lysosomal organelles complex 1 subunit 5 [Source:HGNC Symbol;Acc:HGNC:18561]	TRUE	OID40865	NA	batch_2	NA	TRUE	FALSE
CHM	P24386	ENSG00000188419	CHM Rab escort protein [Source:HGNC Symbol;Acc:HGNC:1940]	TRUE	OID43526	NA	batch_2	NA	TRUE	TRUE
SELL	P14151	ENSG00000188404	selectin L [Source:HGNC Symbol;Acc:HGNC:10720]	TRUE	OID45252	NA	batch_2	NA	TRUE	TRUE
PDCD1	Q15116	ENSG00000188389	programmed cell death 1 [Source:HGNC Symbol;Acc:HGNC:8760]	TRUE	OID44082	NA	batch_2	NA	TRUE	TRUE
PPP3R2	Q96LZ3	ENSG00000188386	protein phosphatase 3 regulatory subunit B, beta [Source:HGNC Symbol;Acc:HGNC:9318]	TRUE	OID40522	NA	batch_2	NA	TRUE	FALSE
JAKMIP3	Q5VZ66	ENSG00000188385	Janus kinase and microtubule interacting protein 3 [Source:HGNC Symbol;Acc:HGNC:23523]	TRUE	OID40322	NA	batch_2	NA	TRUE	FALSE
IFNA2	P01563	ENSG00000188379	interferon alpha 2 [Source:HGNC Symbol;Acc:HGNC:5423]	TRUE	OID40301	NA	batch_2	NA	TRUE	FALSE
GPR15LG	Q6UWK7	ENSG00000188373	G protein-coupled receptor 15 ligand [Source:HGNC Symbol;Acc:HGNC:31428]	TRUE	OID43780	NA	batch_2	NA	TRUE	TRUE
ZP3	P21754	ENSG00000188372	zona pellucida glycoprotein 3 [Source:HGNC Symbol;Acc:HGNC:13189]	TRUE	OID44430	NA	batch_2	NA	TRUE	TRUE
C3orf62	Q6ZUJ4	ENSG00000188315	chromosome 3 open reading frame 62 [Source:HGNC Symbol;Acc:HGNC:24771]	TRUE	OID40901	NA	batch_2	NA	TRUE	FALSE
HES4	Q9HCC6	ENSG00000188290	hes family bHLH transcription factor 4 [Source:HGNC Symbol;Acc:HGNC:24149]	TRUE	OID40286	NA	batch_2	NA	TRUE	FALSE
PLA2G2A	P14555	ENSG00000188257	phospholipase A2 group IIA [Source:HGNC Symbol;Acc:HGNC:9031]	TRUE	OID45225	OID20274	batch_1+2	QuantileSmoothing	TRUE	TRUE
NCR3LG1	Q68D85	ENSG00000188211	natural killer cell cytotoxicity receptor 3 ligand 1 [Source:HGNC Symbol;Acc:HGNC:42400]	TRUE	OID44015	NA	batch_2	NA	TRUE	TRUE
NUTM2B	A6NNL0	ENSG00000188199	NUT family member 2B [Source:HGNC Symbol;Acc:HGNC:23445]	TRUE	OID40475	NA	batch_2	NA	TRUE	FALSE
PRKAR1B	P31321	ENSG00000188191	protein kinase cAMP-dependent type I regulatory subunit beta [Source:HGNC Symbol;Acc:HGNC:9390]	TRUE	OID42942	NA	batch_2	NA	TRUE	FALSE
ZC3H6	P61129	ENSG00000188177	zinc finger CCCH-type containing 6 [Source:HGNC Symbol;Acc:HGNC:24762]	TRUE	OID42047	NA	batch_2	NA	TRUE	FALSE
SMTNL2	Q2TAL5	ENSG00000188176	smoothelin like 2 [Source:HGNC Symbol;Acc:HGNC:24764]	TRUE	OID40608	NA	batch_2	NA	TRUE	FALSE
HEPACAM2	A8MVW5	ENSG00000188175	HEPACAM family member 2 [Source:HGNC Symbol;Acc:HGNC:27364]	TRUE	OID43798	NA	batch_2	NA	TRUE	TRUE
NHS	Q6T4R5	ENSG00000188158	NHS actin remodeling regulator [Source:HGNC Symbol;Acc:HGNC:7820]	TRUE	OID41545	NA	batch_2	NA	TRUE	FALSE
AGRN	O00468	ENSG00000188157	agrin [Source:HGNC Symbol;Acc:HGNC:329]	TRUE	OID44452	OID20786	batch_1+2	QuantileSmoothing	TRUE	TRUE
MAPK12	P53778	ENSG00000188130	mitogen-activated protein kinase 12 [Source:HGNC Symbol;Acc:HGNC:6874]	TRUE	OID40393	NA	batch_2	NA	TRUE	FALSE
DAZ1	Q9NQZ3	ENSG00000188120	deleted in azoospermia 1 [Source:HGNC Symbol;Acc:HGNC:2682]	TRUE	OID41078	NA	batch_2	NA	TRUE	FALSE
C6orf132	Q5T0Z8	ENSG00000188112	chromosome 6 open reading frame 132 [Source:HGNC Symbol;Acc:HGNC:21288]	TRUE	OID40080	NA	batch_2	NA	TRUE	FALSE
ARL4C	P56559	ENSG00000188042	ARF like GTPase 4C [Source:HGNC Symbol;Acc:HGNC:698]	TRUE	OID40824	NA	batch_2	NA	TRUE	FALSE
CTSL3P	Q5NE16	ENSG00000188029, ENSG00000290757	cathepsin L family member 3, pseudogene [Source:HGNC Symbol;Acc:HGNC:33132]	TRUE	OID40140	NA	batch_2	NA	TRUE	FALSE
RILPL1	Q5EBL4	ENSG00000188026	Rab interacting lysosomal protein like 1 [Source:HGNC Symbol;Acc:HGNC:26814]	TRUE	OID43013	NA	batch_2	NA	TRUE	TRUE
S100A3	P33764	ENSG00000188015	S100 calcium binding protein A3 [Source:HGNC Symbol;Acc:HGNC:10493]	TRUE	OID43042	NA	batch_2	NA	TRUE	FALSE
C17orf99	Q6UX52	ENSG00000187997	chromosome 17 open reading frame 99 [Source:HGNC Symbol;Acc:HGNC:34490]	TRUE	OID40889	NA	batch_2	NA	TRUE	FALSE
DNER	Q8NFT8	ENSG00000187957	delta/notch like EGF repeat containing [Source:HGNC Symbol;Acc:HGNC:24456]	TRUE	OID44609	OID20712	batch_1+2	QuantileSmoothing	TRUE	TRUE
FYB2	Q5VWT5	ENSG00000187889	FYN binding protein 2 [Source:HGNC Symbol;Acc:HGNC:27295]	TRUE	OID41222	NA	batch_2	NA	TRUE	FALSE
GFRAL	Q6UXV0	ENSG00000187871	GDNF family receptor alpha like [Source:HGNC Symbol;Acc:HGNC:32789]	TRUE	OID43749	NA	batch_2	NA	TRUE	TRUE
PALM3	A6NDB9	ENSG00000187867	paralemmin 3 [Source:HGNC Symbol;Acc:HGNC:33274]	TRUE	OID44073	NA	batch_2	NA	TRUE	FALSE
TTC24	A2A3L6	ENSG00000187862	tetratricopeptide repeat domain 24 [Source:HGNC Symbol;Acc:HGNC:32348]	TRUE	OID40683	NA	batch_2	NA	TRUE	TRUE
CCDC157	Q569K6	ENSG00000187860	coiled-coil domain containing 157 [Source:HGNC Symbol;Acc:HGNC:33854]	TRUE	OID40942	NA	batch_2	NA	TRUE	FALSE
EIF4EBP1	Q13541	ENSG00000187840	eukaryotic translation initiation factor 4E binding protein 1 [Source:HGNC Symbol;Acc:HGNC:3288]	TRUE	OID44621	OID20162	batch_1+2	MedianCentering	TRUE	TRUE
PLSCR3	Q9NRY6	ENSG00000187838	phospholipid scramblase 3 [Source:HGNC Symbol;Acc:HGNC:16495]	TRUE	OID44102	NA	batch_2	NA	TRUE	FALSE
PEAR1	Q5VY43	ENSG00000187800	platelet endothelial aggregation receptor 1 [Source:HGNC Symbol;Acc:HGNC:33631]	TRUE	OID45216	OID20257	batch_1+2	QuantileSmoothing	TRUE	TRUE
MCRS1	Q96EZ8	ENSG00000187778	microspherule protein 1 [Source:HGNC Symbol;Acc:HGNC:6960]	TRUE	OID41460	NA	batch_2	NA	TRUE	FALSE
DNAH17	Q9UFH2	ENSG00000187775	dynein axonemal heavy chain 17 [Source:HGNC Symbol;Acc:HGNC:2946]	TRUE	OID41109	NA	batch_2	NA	TRUE	FALSE
DIPK1C	Q0P6D2	ENSG00000187773	divergent protein kinase domain 1C [Source:HGNC Symbol;Acc:HGNC:31729]	TRUE	OID42376	NA	batch_2	NA	TRUE	FALSE
SEMA4D	Q92854	ENSG00000187764	semaphorin 4D [Source:HGNC Symbol;Acc:HGNC:10732]	TRUE	OID44920	NA	batch_2	NA	TRUE	TRUE
NHEJ1	Q9H9Q4	ENSG00000187736	non-homologous end joining factor 1 [Source:HGNC Symbol;Acc:HGNC:25737]	TRUE	OID44031	NA	batch_2	NA	TRUE	FALSE
DNAJB13	P59910	ENSG00000187726	DnaJ heat shock protein family (Hsp40) member B13 [Source:HGNC Symbol;Acc:HGNC:30718]	TRUE	OID41113	NA	batch_2	NA	TRUE	FALSE
C2orf88	Q9BSF0	ENSG00000187699	chromosome 2 open reading frame 88 [Source:HGNC Symbol;Acc:HGNC:28191]	TRUE	OID44487	NA	batch_2	NA	TRUE	FALSE
ERC2	O15083	ENSG00000187672	ELKS/RAB6-interacting/CAST family member 2 [Source:HGNC Symbol;Acc:HGNC:31922]	TRUE	OID42422	NA	batch_2	NA	TRUE	FALSE
DHRS4L2	Q6PKH6	ENSG00000187630	dehydrogenase/reductase 4 like 2 [Source:HGNC Symbol;Acc:HGNC:19731]	TRUE	OID43608	NA	batch_2	NA	TRUE	FALSE
CYP26C1	Q6V0L0	ENSG00000187553	cytochrome P450 family 26 subfamily C member 1 [Source:HGNC Symbol;Acc:HGNC:20577]	TRUE	OID41073	NA	batch_2	NA	TRUE	FALSE
H2AP	O75409	ENSG00000187516	H2A.P histone [Source:HGNC Symbol;Acc:HGNC:18417]	TRUE	OID42549	NA	batch_2	NA	TRUE	FALSE
COL4A1	P02462	ENSG00000187498	collagen type IV alpha 1 chain [Source:HGNC Symbol;Acc:HGNC:2202]	TRUE	OID44554	OID20208	batch_1+2	MedianCentering	TRUE	TRUE
CDHR4	A6H8M9	ENSG00000187492	cadherin related family member 4 [Source:HGNC Symbol;Acc:HGNC:34527]	TRUE	OID40974	NA	batch_2	NA	TRUE	TRUE
KCNJ11	Q14654	ENSG00000187486	potassium inwardly rectifying channel subfamily J member 11 [Source:HGNC Symbol;Acc:HGNC:6257]	TRUE	OID40330	NA	batch_2	NA	TRUE	FALSE
H1-6	P22492	ENSG00000187475	H1.6 linker histone, cluster member [Source:HGNC Symbol;Acc:HGNC:4720]	TRUE	OID41277	NA	batch_2	NA	TRUE	FALSE
CHP1	Q99653	ENSG00000187446	calcineurin like EF-hand protein 1 [Source:HGNC Symbol;Acc:HGNC:17433]	TRUE	OID42291	NA	batch_2	NA	TRUE	FALSE
LUZP2	Q86TE4	ENSG00000187398	leucine zipper protein 2 [Source:HGNC Symbol;Acc:HGNC:23206]	TRUE	OID43943	NA	batch_2	NA	TRUE	TRUE
DCC	P43146	ENSG00000187323	DCC netrin 1 receptor [Source:HGNC Symbol;Acc:HGNC:2701]	TRUE	OID42349	NA	batch_2	NA	TRUE	FALSE
BCAM	P50895	ENSG00000187244	basal cell adhesion molecule (Lutheran blood group) [Source:HGNC Symbol;Acc:HGNC:6722]	TRUE	OID45039	NA	batch_2	NA	TRUE	TRUE
KRT12	Q99456	ENSG00000187242	keratin 12 [Source:HGNC Symbol;Acc:HGNC:6414]	TRUE	OID40359	NA	batch_2	NA	TRUE	FALSE
DYNC2H1	Q8NCM8	ENSG00000187240	dynein cytoplasmic 2 heavy chain 1 [Source:HGNC Symbol;Acc:HGNC:2962]	TRUE	OID41133	NA	batch_2	NA	TRUE	FALSE
FNBP1	Q96RU3	ENSG00000187239	formin binding protein 1 [Source:HGNC Symbol;Acc:HGNC:17069]	TRUE	OID44658	NA	batch_2	NA	TRUE	TRUE
SESTD1	Q86VW0	ENSG00000187231	SEC14 and spectrin domain containing 1 [Source:HGNC Symbol;Acc:HGNC:18379]	TRUE	OID41786	NA	batch_2	NA	TRUE	FALSE
GCNT1	Q02742	ENSG00000187210	glucosaminyl (N-acetyl) transferase 1 [Source:HGNC Symbol;Acc:HGNC:4203]	TRUE	OID43745	NA	batch_2	NA	TRUE	TRUE
ANGPTL5	Q86XS5	ENSG00000187151	angiopoietin like 5 [Source:HGNC Symbol;Acc:HGNC:19705]	TRUE	OID40791	NA	batch_2	NA	TRUE	FALSE
SPATA21	Q7Z572	ENSG00000187144	spermatogenesis associated 21 [Source:HGNC Symbol;Acc:HGNC:28026]	TRUE	OID41847	NA	batch_2	NA	TRUE	FALSE
VSTM2B	A6NLU5	ENSG00000187135	V-set and transmembrane domain containing 2B [Source:HGNC Symbol;Acc:HGNC:33595]	TRUE	OID43280	NA	batch_2	NA	TRUE	FALSE
CMC1	Q7Z7K0	ENSG00000187118	C-X9-C motif containing 1 [Source:HGNC Symbol;Acc:HGNC:28783]	TRUE	OID44549	NA	batch_2	NA	TRUE	FALSE
LILRA5	A6NI73	ENSG00000187116	leukocyte immunoglobulin like receptor A5 [Source:HGNC Symbol;Acc:HGNC:16309]	TRUE	OID44754	OID20209	batch_1+2	MedianCentering	TRUE	TRUE
HEATR4	Q86WZ0	ENSG00000187105	HEAT repeat containing 4 [Source:HGNC Symbol;Acc:HGNC:16761]	TRUE	OID41284	NA	batch_2	NA	TRUE	FALSE
ENTPD5	O75356	ENSG00000187097	ectonucleoside triphosphate diphosphohydrolase 5 (inactive) [Source:HGNC Symbol;Acc:HGNC:3367]	TRUE	OID43677	OID20104	batch_1+2	MedianCentering	TRUE	TRUE
CCK	P06307	ENSG00000187094	cholecystokinin [Source:HGNC Symbol;Acc:HGNC:1569]	TRUE	OID43467	NA	batch_2	NA	TRUE	TRUE
PLCD1	P51178	ENSG00000187091	phospholipase C delta 1 [Source:HGNC Symbol;Acc:HGNC:9060]	TRUE	OID41619	NA	batch_2	NA	TRUE	FALSE
C3orf70	A6NLC5	ENSG00000187068	chromosome 3 open reading frame 70 [Source:HGNC Symbol;Acc:HGNC:33731]	TRUE	OID40902	NA	batch_2	NA	TRUE	FALSE
PNLIPRP1	P54315	ENSG00000187021	pancreatic lipase related protein 1 [Source:HGNC Symbol;Acc:HGNC:9156]	TRUE	OID44106	NA	batch_2	NA	TRUE	TRUE
EMID1	Q96A84	ENSG00000186998	EMI domain containing 1 [Source:HGNC Symbol;Acc:HGNC:18036]	TRUE	OID42407	NA	batch_2	NA	TRUE	FALSE
CHCHD2P9	Q5T1J5	ENSG00000186940	coiled-coil-helix-coiled-coil-helix domain containing 2 pseudogene 9 [Source:HGNC Symbol;Acc:HGNC:23676]	TRUE	OID41009	NA	batch_2	NA	TRUE	FALSE
SERPINA11	Q86U17	ENSG00000186910	serpin family A member 11 [Source:HGNC Symbol;Acc:HGNC:19193]	TRUE	OID45254	OID20281	batch_1+2	QuantileSmoothing	TRUE	TRUE
RTN4RL2	Q86UN3	ENSG00000186907	reticulon 4 receptor like 2 [Source:HGNC Symbol;Acc:HGNC:23053]	TRUE	OID41754	NA	batch_2	NA	TRUE	FALSE
FGF3	P11487	ENSG00000186895	fibroblast growth factor 3 [Source:HGNC Symbol;Acc:HGNC:3681]	TRUE	OID43712	NA	batch_2	NA	TRUE	FALSE
ERCC6L	Q2NKX8	ENSG00000186871	ERCC excision repair 6 like, spindle assembly checkpoint helicase [Source:HGNC Symbol;Acc:HGNC:20794]	TRUE	OID40204	NA	batch_2	NA	TRUE	FALSE
MAPT	P10636	ENSG00000186868	microtubule associated protein tau [Source:HGNC Symbol;Acc:HGNC:6893]	TRUE	OID42741	NA	batch_2	NA	TRUE	FALSE
KRT14	P02533	ENSG00000186847	keratin 14 [Source:HGNC Symbol;Acc:HGNC:6416]	TRUE	OID42682	NA	batch_2	NA	TRUE	FALSE
HEXIM1	O94992	ENSG00000186834	HEXIM P-TEFb complex subunit 1 [Source:HGNC Symbol;Acc:HGNC:24953]	TRUE	OID43799	OID20589	batch_1+2	MedianCentering	TRUE	TRUE
TNFRSF4	P43489	ENSG00000186827	TNF receptor superfamily member 4 [Source:HGNC Symbol;Acc:HGNC:11918]	TRUE	OID44342	OID20653	batch_1+2	QuantileSmoothing	TRUE	TRUE
LILRB4	Q8NHJ6	ENSG00000186818	leukocyte immunoglobulin like receptor B4 [Source:HGNC Symbol;Acc:HGNC:6608]	TRUE	OID42697	OID20429	batch_1+2	MedianCentering	TRUE	TRUE
ZNF397	Q8NF99	ENSG00000186812	zinc finger protein 397 [Source:HGNC Symbol;Acc:HGNC:18818]	TRUE	OID42066	NA	batch_2	NA	TRUE	FALSE
VSIG10L	Q86VR7	ENSG00000186806	V-set and immunoglobulin domain containing 10 like [Source:HGNC Symbol;Acc:HGNC:27111]	TRUE	OID44399	NA	batch_2	NA	TRUE	TRUE
BCR	P11274	ENSG00000186716	BCR activator of RhoGEF and GTPase [Source:HGNC Symbol;Acc:HGNC:1014]	TRUE	OID43412	OID20558	batch_1+2	QuantileSmoothing	TRUE	TRUE
CCDC73	Q6ZRK6	ENSG00000186714	coiled-coil domain containing 73 [Source:HGNC Symbol;Acc:HGNC:23261]	TRUE	OID40956	NA	batch_2	NA	TRUE	FALSE
PRR5	P85299	ENSG00000186654	proline rich 5 [Source:HGNC Symbol;Acc:HGNC:31682]	TRUE	OID42953	NA	batch_2	NA	TRUE	FALSE
PRG2	P13727	ENSG00000186652	proteoglycan 2, pro eosinophil major basic protein [Source:HGNC Symbol;Acc:HGNC:9362]	TRUE	OID45236	NA	batch_2	NA	TRUE	TRUE
PDE2A	O00408	ENSG00000186642	phosphodiesterase 2A [Source:HGNC Symbol;Acc:HGNC:8777]	TRUE	OID41601	NA	batch_2	NA	TRUE	FALSE
KIF24	Q5T7B8	ENSG00000186638	kinesin family member 24 [Source:HGNC Symbol;Acc:HGNC:19916]	TRUE	OID41377	NA	batch_2	NA	TRUE	FALSE
FSD2	A1L4K1	ENSG00000186628	fibronectin type III and SPRY domain containing 2 [Source:HGNC Symbol;Acc:HGNC:18024]	TRUE	OID41219	NA	batch_2	NA	TRUE	TRUE
SPATC1	Q76KD6	ENSG00000186583	spermatogenesis and centriole associated 1 [Source:HGNC Symbol;Acc:HGNC:30510]	TRUE	OID41852	NA	batch_2	NA	TRUE	FALSE
CEACAM19	Q7Z692	ENSG00000186567	CEA cell adhesion molecule 19 [Source:HGNC Symbol;Acc:HGNC:31951]	TRUE	OID43513	NA	batch_2	NA	TRUE	TRUE
GPATCH8	Q9UKJ3	ENSG00000186566	G-patch domain containing 8 [Source:HGNC Symbol;Acc:HGNC:29066]	TRUE	OID41259	NA	batch_2	NA	TRUE	FALSE
SEPTIN10	Q9P0V9	ENSG00000186522	septin 10 [Source:HGNC Symbol;Acc:HGNC:14349]	TRUE	OID41781	NA	batch_2	NA	TRUE	FALSE
ARHGAP30	Q7Z6I6	ENSG00000186517	Rho GTPase activating protein 30 [Source:HGNC Symbol;Acc:HGNC:27414]	TRUE	OID43381	NA	batch_2	NA	TRUE	TRUE
ZNF396	Q96N95	ENSG00000186496	zinc finger protein 396 [Source:HGNC Symbol;Acc:HGNC:18824]	TRUE	OID40745	NA	batch_2	NA	TRUE	FALSE
MYT1L	Q9UL68	ENSG00000186487	myelin transcription factor 1 like [Source:HGNC Symbol;Acc:HGNC:7623]	TRUE	OID40439	NA	batch_2	NA	TRUE	FALSE
RGS7BP	Q6MZT1	ENSG00000186479	regulator of G protein signaling 7 binding protein [Source:HGNC Symbol;Acc:HGNC:23271]	TRUE	OID40562	NA	batch_2	NA	TRUE	FALSE
KLK12	Q9UKR0	ENSG00000186474	kallikrein related peptidase 12 [Source:HGNC Symbol;Acc:HGNC:6360]	TRUE	OID42678	NA	batch_2	NA	TRUE	FALSE
AKAP14	Q86UN6	ENSG00000186471	A-kinase anchoring protein 14 [Source:HGNC Symbol;Acc:HGNC:24061]	TRUE	OID40779	NA	batch_2	NA	TRUE	FALSE
BTN3A2	P78410	ENSG00000186470	butyrophilin subfamily 3 member A2 [Source:HGNC Symbol;Acc:HGNC:1139]	TRUE	OID43429	OID20540	batch_1+2	QuantileSmoothing	TRUE	TRUE
FAM228A	Q86W67	ENSG00000186453	family with sequence similarity 228 member A [Source:HGNC Symbol;Acc:HGNC:34418]	TRUE	OID40228	NA	batch_2	NA	TRUE	TRUE
FCAR	P24071	ENSG00000186431	Fc alpha receptor [Source:HGNC Symbol;Acc:HGNC:3608]	TRUE	OID43704	OID20564	batch_1+2	MedianCentering	TRUE	TRUE
NKRF	O15226	ENSG00000186416	NFKB repressing factor [Source:HGNC Symbol;Acc:HGNC:19374]	TRUE	OID41547	NA	batch_2	NA	TRUE	FALSE
CCDC30	Q5VVM6	ENSG00000186409	coiled-coil domain containing 30 [Source:HGNC Symbol;Acc:HGNC:26103]	TRUE	OID40093	NA	batch_2	NA	TRUE	TRUE
CD300E	Q496F6	ENSG00000186407	CD300e molecule [Source:HGNC Symbol;Acc:HGNC:28874]	TRUE	OID43488	NA	batch_2	NA	TRUE	TRUE
ZNF75D	P51815	ENSG00000186376	zinc finger protein 75D [Source:HGNC Symbol;Acc:HGNC:13145]	TRUE	OID43306	NA	batch_2	NA	TRUE	FALSE
THBS2	P35442	ENSG00000186340	thrombospondin 2 [Source:HGNC Symbol;Acc:HGNC:11786]	TRUE	OID45277	NA	batch_2	NA	TRUE	TRUE
BACE1	P56817	ENSG00000186318	beta-secretase 1 [Source:HGNC Symbol;Acc:HGNC:933]	TRUE	OID40848	NA	batch_2	NA	TRUE	TRUE
PPP1CC	P36873	ENSG00000186298	protein phosphatase 1 catalytic subunit gamma [Source:HGNC Symbol;Acc:HGNC:9283]	TRUE	OID44115	NA	batch_2	NA	TRUE	TRUE
BTLA	Q7Z6A9	ENSG00000186265	B and T lymphocyte associated [Source:HGNC Symbol;Acc:HGNC:21087]	TRUE	OID42198	NA	batch_2	NA	TRUE	FALSE
SOWAHB	A6NEL2	ENSG00000186212	sosondowah ankyrin repeat domain family member B [Source:HGNC Symbol;Acc:HGNC:32958]	TRUE	OID41833	NA	batch_2	NA	TRUE	FALSE
SLC51B	Q86UW2	ENSG00000186198	SLC51 subunit beta [Source:HGNC Symbol;Acc:HGNC:29956]	TRUE	OID43097	NA	batch_2	NA	TRUE	FALSE
EDARADD	Q8WWZ3	ENSG00000186197	EDAR associated via death domain [Source:HGNC Symbol;Acc:HGNC:14341]	TRUE	OID40186	NA	batch_2	NA	TRUE	FALSE
CENATAC	Q86UT8	ENSG00000186166	centrosomal AT-AC splicing factor [Source:HGNC Symbol;Acc:HGNC:30460]	TRUE	OID40989	NA	batch_2	NA	TRUE	TRUE
WWOX	Q9NZC7	ENSG00000186153	WW domain containing oxidoreductase [Source:HGNC Symbol;Acc:HGNC:12799]	TRUE	OID44414	NA	batch_2	NA	TRUE	FALSE
UBL4B	Q8N7F7	ENSG00000186150	ubiquitin like 4B [Source:HGNC Symbol;Acc:HGNC:32309]	TRUE	OID43261	NA	batch_2	NA	TRUE	FALSE
GSAP	A4D1B5	ENSG00000186088	gamma-secretase activating protein [Source:HGNC Symbol;Acc:HGNC:28042]	TRUE	OID42539	NA	batch_2	NA	TRUE	FALSE
KRT5	P13647	ENSG00000186081	keratin 5 [Source:HGNC Symbol;Acc:HGNC:6442]	TRUE	OID42684	NA	batch_2	NA	TRUE	FALSE
CD300LF	Q8TDQ1	ENSG00000186074	CD300 molecule like family member f [Source:HGNC Symbol;Acc:HGNC:29883]	TRUE	OID43489	NA	batch_2	NA	TRUE	TRUE
CDIN1	Q9Y2V0	ENSG00000186073	CDAN1 interacting nuclease 1 [Source:HGNC Symbol;Acc:HGNC:26929]	TRUE	OID42252	NA	batch_2	NA	TRUE	TRUE
AIDA	Q96BJ3	ENSG00000186063	axin interactor, dorsalization associated [Source:HGNC Symbol;Acc:HGNC:25761]	TRUE	OID42099	NA	batch_2	NA	TRUE	TRUE
DLEU7	Q6UYE1	ENSG00000186047	deleted in lymphocytic leukemia 7 [Source:HGNC Symbol;Acc:HGNC:17567]	TRUE	OID40160	NA	batch_2	NA	TRUE	FALSE
PLK5	Q496M5	ENSG00000185988	polo like kinase 5 (inactive) [Source:HGNC Symbol;Acc:HGNC:27001]	TRUE	OID40512	NA	batch_2	NA	TRUE	FALSE
SLITRK2	Q9H156	ENSG00000185985	SLIT and NTRK like family member 2 [Source:HGNC Symbol;Acc:HGNC:13449]	TRUE	OID44256	NA	batch_2	NA	TRUE	TRUE
BICD2	Q8TD16	ENSG00000185963	BICD cargo adaptor 2 [Source:HGNC Symbol;Acc:HGNC:17208]	TRUE	OID44475	NA	batch_2	NA	TRUE	TRUE
FAM186A	A6NE01	ENSG00000185958	family with sequence similarity 186 member A [Source:HGNC Symbol;Acc:HGNC:26980]	TRUE	OID41190	NA	batch_2	NA	TRUE	FALSE
RNPC3	Q96LT9	ENSG00000185946	RNA binding region (RNP1, RRM) containing 3 [Source:HGNC Symbol;Acc:HGNC:18666]	TRUE	OID41737	NA	batch_2	NA	TRUE	FALSE
LAMP1	P11279	ENSG00000185896	lysosomal associated membrane protein 1 [Source:HGNC Symbol;Acc:HGNC:6499]	TRUE	OID45172	NA	batch_2	NA	TRUE	FALSE
TRIM69	Q86WT6	ENSG00000185880	tripartite motif containing 69 [Source:HGNC Symbol;Acc:HGNC:17857]	TRUE	OID43241	NA	batch_2	NA	TRUE	FALSE
TMPRSS11B	Q86T26	ENSG00000185873	transmembrane serine protease 11B [Source:HGNC Symbol;Acc:HGNC:25398]	TRUE	OID43203	NA	batch_2	NA	TRUE	FALSE
EVI2B	P34910	ENSG00000185862	ecotropic viral integration site 2B [Source:HGNC Symbol;Acc:HGNC:3500]	TRUE	OID42430	NA	batch_2	NA	TRUE	FALSE
PCYT2	Q99447	ENSG00000185813	phosphate cytidylyltransferase 2, ethanolamine [Source:HGNC Symbol;Acc:HGNC:8756]	TRUE	OID44081	NA	batch_2	NA	TRUE	TRUE
WDR53	Q7Z5U6	ENSG00000185798	WD repeat domain 53 [Source:HGNC Symbol;Acc:HGNC:28786]	TRUE	OID42022	NA	batch_2	NA	TRUE	FALSE
NLRP9	Q7RTR0	ENSG00000185792	NLR family pyrin domain containing 9 [Source:HGNC Symbol;Acc:HGNC:22941]	TRUE	OID42838	NA	batch_2	NA	TRUE	FALSE
MORF4L1	Q9UBU8	ENSG00000185787	mortality factor 4 like 1 [Source:HGNC Symbol;Acc:HGNC:16989]	TRUE	OID42768	NA	batch_2	NA	TRUE	FALSE
KCNIP4	Q6PIL6	ENSG00000185774	potassium voltage-gated channel interacting protein 4 [Source:HGNC Symbol;Acc:HGNC:30083]	TRUE	OID42653	NA	batch_2	NA	TRUE	FALSE
ADAMTSL5	Q6ZMM2	ENSG00000185761	ADAMTS like 5 [Source:HGNC Symbol;Acc:HGNC:27912]	TRUE	OID44441	NA	batch_2	NA	TRUE	TRUE
IFIT1	P09914	ENSG00000185745	interferon induced protein with tetratricopeptide repeats 1 [Source:HGNC Symbol;Acc:HGNC:5407]	TRUE	OID42583	NA	batch_2	NA	TRUE	FALSE
NRG3	P56975	ENSG00000185737	neuregulin 3 [Source:HGNC Symbol;Acc:HGNC:7999]	TRUE	OID41560	NA	batch_2	NA	TRUE	TRUE
YTHDF3	Q7Z739	ENSG00000185728	YTH N6-methyladenosine RNA binding protein F3 [Source:HGNC Symbol;Acc:HGNC:26465]	TRUE	OID43291	OID20478	batch_1+2	MedianCentering	TRUE	TRUE
PRAME	P78395	ENSG00000185686	PRAME nuclear receptor transcriptional regulator [Source:HGNC Symbol;Acc:HGNC:9336]	TRUE	OID42936	NA	batch_2	NA	TRUE	FALSE
EP400P1	Q6ZTU2	ENSG00000185684	EP400 pseudogene 1 [Source:HGNC Symbol;Acc:HGNC:26602]	TRUE	OID40201	NA	batch_2	NA	TRUE	FALSE
MORN5	Q5VZ52	ENSG00000185681	MORN repeat containing 5 [Source:HGNC Symbol;Acc:HGNC:17841]	TRUE	OID40418	NA	batch_2	NA	TRUE	FALSE
LYG2	Q86SG7	ENSG00000185674	lysozyme g2 [Source:HGNC Symbol;Acc:HGNC:29615]	TRUE	OID41435	NA	batch_2	NA	TRUE	FALSE
NTF3	P20783	ENSG00000185652	neurotrophin 3 [Source:HGNC Symbol;Acc:HGNC:8023]	TRUE	OID44042	OID20591	batch_1+2	QuantileSmoothing	TRUE	TRUE
NDUFA4L2	Q9NRX3	ENSG00000185633	NDUFA4 mitochondrial complex associated like 2 [Source:HGNC Symbol;Acc:HGNC:29836]	TRUE	OID41535	NA	batch_2	NA	TRUE	FALSE
PBX1	P40424	ENSG00000185630	PBX homeobox 1 [Source:HGNC Symbol;Acc:HGNC:8632]	TRUE	OID41592	NA	batch_2	NA	TRUE	FALSE
P4HB	P07237	ENSG00000185624	prolyl 4-hydroxylase subunit beta [Source:HGNC Symbol;Acc:HGNC:8548]	TRUE	OID44830	NA	batch_2	NA	TRUE	TRUE
PDIA2	Q13087	ENSG00000185615	protein disulfide isomerase family A member 2 [Source:HGNC Symbol;Acc:HGNC:14180]	TRUE	OID42892	NA	batch_2	NA	TRUE	FALSE
INKA1	Q96EL1	ENSG00000185614	inka box actin regulator 1 [Source:HGNC Symbol;Acc:HGNC:32480]	TRUE	OID41328	NA	batch_2	NA	TRUE	FALSE
DBX2	Q6ZNG2	ENSG00000185610	developing brain homeobox 2 [Source:HGNC Symbol;Acc:HGNC:33186]	TRUE	OID41080	NA	batch_2	NA	TRUE	FALSE
AHNAK2	Q8IVF2	ENSG00000185567	AHNAK nucleoprotein 2 [Source:HGNC Symbol;Acc:HGNC:20125]	TRUE	OID43346	NA	batch_2	NA	TRUE	TRUE
DLK1	P80370	ENSG00000185559	delta like non-canonical Notch ligand 1 [Source:HGNC Symbol;Acc:HGNC:2907]	TRUE	OID45107	OID20295	batch_1+2	MedianCentering	TRUE	TRUE
PRKG1	Q13976	ENSG00000185532	protein kinase cGMP-dependent 1 [Source:HGNC Symbol;Acc:HGNC:9414]	TRUE	OID44870	NA	batch_2	NA	TRUE	TRUE
LMNTD2	Q8IXW0	ENSG00000185522	lamin tail domain containing 2 [Source:HGNC Symbol;Acc:HGNC:28561]	TRUE	OID41418	NA	batch_2	NA	TRUE	FALSE
FAM131C	Q96AQ9	ENSG00000185519	family with sequence similarity 131 member C [Source:HGNC Symbol;Acc:HGNC:26717]	TRUE	OID41184	NA	batch_2	NA	TRUE	FALSE
MUC1	P15941	ENSG00000185499	mucin 1, cell surface associated [Source:HGNC Symbol;Acc:HGNC:7508]	TRUE	OID45191	NA	batch_2	NA	TRUE	TRUE
ROR1	Q01973	ENSG00000185483	receptor tyrosine kinase like orphan receptor 1 [Source:HGNC Symbol;Acc:HGNC:10256]	TRUE	OID44902	OID20224	batch_1+2	QuantileSmoothing	TRUE	TRUE
STAC3	Q96MF2	ENSG00000185482	SH3 and cysteine rich domain 3 [Source:HGNC Symbol;Acc:HGNC:28423]	TRUE	OID40628	NA	batch_2	NA	TRUE	TRUE
PARPBP	Q9NWS1	ENSG00000185480	PARP1 binding protein [Source:HGNC Symbol;Acc:HGNC:26074]	TRUE	OID41589	NA	batch_2	NA	TRUE	FALSE
GPRIN3	Q6ZVF9	ENSG00000185477	GPRIN family member 3 [Source:HGNC Symbol;Acc:HGNC:27733]	TRUE	OID41264	NA	batch_2	NA	TRUE	TRUE
KPNA7	A9QM74	ENSG00000185467	karyopherin subunit alpha 7 [Source:HGNC Symbol;Acc:HGNC:21839]	TRUE	OID40355	NA	batch_2	NA	TRUE	TRUE
IFNLR1	Q8IU57	ENSG00000185436	interferon lambda receptor 1 [Source:HGNC Symbol;Acc:HGNC:18584]	TRUE	OID43835	OID20506	batch_1+2	QuantileSmoothing	TRUE	TRUE
SMYD3	Q9H7B4	ENSG00000185420	SET and MYND domain containing 3 [Source:HGNC Symbol;Acc:HGNC:15513]	TRUE	OID41824	NA	batch_2	NA	TRUE	TRUE
TARS3	A2RTX5	ENSG00000185418	threonyl-tRNA synthetase 3 [Source:HGNC Symbol;Acc:HGNC:24728]	TRUE	OID41909	NA	batch_2	NA	TRUE	FALSE
HGS	O14964	ENSG00000185359	hepatocyte growth factor-regulated tyrosine kinase substrate [Source:HGNC Symbol;Acc:HGNC:4897]	TRUE	OID42559	NA	batch_2	NA	TRUE	FALSE
PRKN	O60260	ENSG00000185345	parkin RBR E3 ubiquitin protein ligase [Source:HGNC Symbol;Acc:HGNC:8607]	TRUE	OID41667	NA	batch_2	NA	TRUE	FALSE
GAS2L1	Q99501	ENSG00000185340	growth arrest specific 2 like 1 [Source:HGNC Symbol;Acc:HGNC:16955]	TRUE	OID44672	NA	batch_2	NA	TRUE	TRUE
TCN2	P20062	ENSG00000185339	transcobalamin 2 [Source:HGNC Symbol;Acc:HGNC:11653]	TRUE	OID45417	OID20341	batch_1+2	MedianCentering	TRUE	TRUE
C12orf56	Q8IXR9	ENSG00000185306	chromosome 12 open reading frame 56 [Source:HGNC Symbol;Acc:HGNC:26967]	TRUE	OID40883	NA	batch_2	NA	TRUE	FALSE
SFTPA2	Q8IWL1	ENSG00000185303	surfactant protein A2 [Source:HGNC Symbol;Acc:HGNC:10799]	TRUE	OID43066	NA	batch_2	NA	TRUE	FALSE
CCDC137	Q6PK04	ENSG00000185298	coiled-coil domain containing 137 [Source:HGNC Symbol;Acc:HGNC:33451]	TRUE	OID40936	NA	batch_2	NA	TRUE	FALSE
CDNF	Q49AH0	ENSG00000185267	cerebral dopamine neurotrophic factor [Source:HGNC Symbol;Acc:HGNC:24913]	TRUE	OID43510	NA	batch_2	NA	TRUE	TRUE
GP1BA	P07359	ENSG00000185245	glycoprotein Ib platelet subunit alpha [Source:HGNC Symbol;Acc:HGNC:4439]	TRUE	OID45365	OID20381	batch_1+2	QuantileSmoothing	TRUE	TRUE
PRMT3	O60678	ENSG00000185238	protein arginine methyltransferase 3 [Source:HGNC Symbol;Acc:HGNC:30163]	TRUE	OID41668	NA	batch_2	NA	TRUE	FALSE
TNFAIP2	Q03169	ENSG00000185215	TNF alpha induced protein 2 [Source:HGNC Symbol;Acc:HGNC:11895]	TRUE	OID44336	NA	batch_2	NA	TRUE	TRUE
INPP5J	Q15735	ENSG00000185133	inositol polyphosphate-5-phosphatase J [Source:HGNC Symbol;Acc:HGNC:8956]	TRUE	OID42634	NA	batch_2	NA	TRUE	FALSE
MANEAL	Q5VSG8	ENSG00000185090	mannosidase endo-alpha like [Source:HGNC Symbol;Acc:HGNC:26452]	TRUE	OID42730	NA	batch_2	NA	TRUE	FALSE
FLRT2	O43155	ENSG00000185070	fibronectin leucine rich transmembrane protein 2 [Source:HGNC Symbol;Acc:HGNC:3761]	TRUE	OID43720	NA	batch_2	NA	TRUE	FALSE
EFCAB10	A6NFE3	ENSG00000185055	EF-hand calcium binding domain 10 [Source:HGNC Symbol;Acc:HGNC:34531]	TRUE	OID41145	NA	batch_2	NA	TRUE	TRUE
MROH2A	A6NES4	ENSG00000185038	maestro heat like repeat family member 2A [Source:HGNC Symbol;Acc:HGNC:27936]	TRUE	OID40424	NA	batch_2	NA	TRUE	FALSE
BRF1	Q92994	ENSG00000185024	BRF1 general transcription factor IIIB subunit [Source:HGNC Symbol;Acc:HGNC:11551]	TRUE	OID40869	NA	batch_2	NA	TRUE	FALSE
UBOX5	O94941	ENSG00000185019	U-box domain containing 5 [Source:HGNC Symbol;Acc:HGNC:17777]	TRUE	OID41988	NA	batch_2	NA	TRUE	TRUE
CA13	Q8N1Q1	ENSG00000185015	carbonic anhydrase 13 [Source:HGNC Symbol;Acc:HGNC:14914]	TRUE	OID44489	OID20225	batch_1+2	MedianCentering	TRUE	TRUE
ROBO2	Q9HCK4	ENSG00000185008	roundabout guidance receptor 2 [Source:HGNC Symbol;Acc:HGNC:10250]	TRUE	OID44901	NA	batch_2	NA	TRUE	TRUE
TMEM106A	Q96A25	ENSG00000184988	transmembrane protein 106A [Source:HGNC Symbol;Acc:HGNC:28288]	TRUE	OID44329	NA	batch_2	NA	TRUE	TRUE
SORCS2	Q96PQ0	ENSG00000184985	sortilin related VPS10 domain containing receptor 2 [Source:HGNC Symbol;Acc:HGNC:16698]	TRUE	OID43111	NA	batch_2	NA	TRUE	FALSE
FAM227A	F5H4B4	ENSG00000184949	family with sequence similarity 227 member A [Source:HGNC Symbol;Acc:HGNC:44197]	TRUE	OID40227	NA	batch_2	NA	TRUE	FALSE
ZFP90	Q8TF47	ENSG00000184939	ZFP90 zinc finger protein [Source:HGNC Symbol;Acc:HGNC:23329]	TRUE	OID40736	NA	batch_2	NA	TRUE	FALSE
WT1	P19544	ENSG00000184937	WT1 transcription factor [Source:HGNC Symbol;Acc:HGNC:12796]	TRUE	OID40717	NA	batch_2	NA	TRUE	FALSE
PTRHD1	Q6GMV3	ENSG00000184924	peptidyl-tRNA hydrolase domain containing 1 [Source:HGNC Symbol;Acc:HGNC:33782]	TRUE	OID44881	NA	batch_2	NA	TRUE	FALSE
FMNL1	O95466	ENSG00000184922	formin like 1 [Source:HGNC Symbol;Acc:HGNC:1212]	TRUE	OID43723	NA	batch_2	NA	TRUE	TRUE
SRY	Q05066	ENSG00000184895	sex determining region Y [Source:HGNC Symbol;Acc:HGNC:11311]	TRUE	OID41868	NA	batch_2	NA	TRUE	FALSE
ARMCX2	Q7L311	ENSG00000184867	armadillo repeat containing X-linked 2 [Source:HGNC Symbol;Acc:HGNC:16869]	TRUE	OID42144	NA	batch_2	NA	TRUE	FALSE
RBM33	Q96EV2	ENSG00000184863	RNA binding motif protein 33 [Source:HGNC Symbol;Acc:HGNC:27223]	TRUE	OID41709	NA	batch_2	NA	TRUE	FALSE
ZBTB7C	A1YPR0	ENSG00000184828	zinc finger and BTB domain containing 7C [Source:HGNC Symbol;Acc:HGNC:31700]	TRUE	OID42045	NA	batch_2	NA	TRUE	FALSE
ATL3	Q6DD88	ENSG00000184743	atlastin GTPase 3 [Source:HGNC Symbol;Acc:HGNC:24526]	TRUE	OID40840	NA	batch_2	NA	TRUE	FALSE
DDX53	Q86TM3	ENSG00000184735	DEAD-box helicase 53 [Source:HGNC Symbol;Acc:HGNC:20083]	TRUE	OID42363	NA	batch_2	NA	TRUE	FALSE
APOBR	Q0VD83	ENSG00000184730	apolipoprotein B receptor [Source:HGNC Symbol;Acc:HGNC:24087]	TRUE	OID44467	NA	batch_2	NA	TRUE	TRUE
EIF4ENIF1	Q9NRA8	ENSG00000184708	eukaryotic translation initiation factor 4E nuclear import factor 1 [Source:HGNC Symbol;Acc:HGNC:16687]	TRUE	OID41152	NA	batch_2	NA	TRUE	FALSE
RALYL	Q86SE5	ENSG00000184672	RALY RNA binding protein like [Source:HGNC Symbol;Acc:HGNC:27036]	TRUE	OID40546	NA	batch_2	NA	TRUE	FALSE
CDCA2	Q69YH5	ENSG00000184661	cell division cycle associated 2 [Source:HGNC Symbol;Acc:HGNC:14623]	TRUE	OID40099	NA	batch_2	NA	TRUE	FALSE
SEPTIN9	Q9UHD8	ENSG00000184640	septin 9 [Source:HGNC Symbol;Acc:HGNC:7323]	TRUE	OID44228	NA	batch_2	NA	TRUE	FALSE
MED12	Q93074	ENSG00000184634	mediator complex subunit 12 [Source:HGNC Symbol;Acc:HGNC:11957]	TRUE	OID40404	NA	batch_2	NA	TRUE	FALSE
NELL2	Q99435	ENSG00000184613	neural EGFL like 2 [Source:HGNC Symbol;Acc:HGNC:7751]	TRUE	OID44808	OID20706	batch_1+2	MedianCentering	TRUE	TRUE
TAFA3	Q7Z5A8	ENSG00000184599	TAFA chemokine like family member 3 [Source:HGNC Symbol;Acc:HGNC:21590]	TRUE	OID41906	NA	batch_2	NA	TRUE	FALSE
PIWIL3	Q7Z3Z3	ENSG00000184571	piwi like RNA-mediated gene silencing 3 [Source:HGNC Symbol;Acc:HGNC:18443]	TRUE	OID40504	NA	batch_2	NA	TRUE	FALSE
SLITRK6	Q9H5Y7	ENSG00000184564	SLIT and NTRK like family member 6 [Source:HGNC Symbol;Acc:HGNC:23503]	TRUE	OID44257	OID20094	batch_1+2	QuantileSmoothing	TRUE	TRUE
CEND1	Q8N111	ENSG00000184524	cell cycle exit and neuronal differentiation 1 [Source:HGNC Symbol;Acc:HGNC:24153]	TRUE	OID42266	NA	batch_2	NA	TRUE	FALSE
HDDC3	Q8N4P3	ENSG00000184508	HD domain containing 3 [Source:HGNC Symbol;Acc:HGNC:30522]	TRUE	OID41282	NA	batch_2	NA	TRUE	FALSE
NUTM1	Q86Y26	ENSG00000184507	NUT midline carcinoma family member 1 [Source:HGNC Symbol;Acc:HGNC:29919]	TRUE	OID42860	NA	batch_2	NA	TRUE	FALSE
GAST	P01350	ENSG00000184502	gastrin [Source:HGNC Symbol;Acc:HGNC:4164]	TRUE	OID43740	NA	batch_2	NA	TRUE	TRUE
PTP4A3	O75365	ENSG00000184489	protein tyrosine phosphatase 4A3 [Source:HGNC Symbol;Acc:HGNC:9636]	TRUE	OID42965	NA	batch_2	NA	TRUE	FALSE
COPB2	P35606	ENSG00000184432	COPI coat complex subunit beta 2 [Source:HGNC Symbol;Acc:HGNC:2232]	TRUE	OID43557	NA	batch_2	NA	TRUE	FALSE
TOP1MT	Q969P6	ENSG00000184428	DNA topoisomerase I mitochondrial [Source:HGNC Symbol;Acc:HGNC:29787]	TRUE	OID43214	NA	batch_2	NA	TRUE	FALSE
KCND2	Q9NZV8	ENSG00000184408	potassium voltage-gated channel subfamily D member 2 [Source:HGNC Symbol;Acc:HGNC:6238]	TRUE	OID41359	NA	batch_2	NA	TRUE	FALSE
CSF1	P09603	ENSG00000184371	colony stimulating factor 1 [Source:HGNC Symbol;Acc:HGNC:2432]	TRUE	OID44574	OID20719	batch_1+2	QuantileSmoothing	TRUE	TRUE
MAP7D2	Q96T17	ENSG00000184368	MAP7 domain containing 2 [Source:HGNC Symbol;Acc:HGNC:25899]	TRUE	OID41449	NA	batch_2	NA	TRUE	FALSE
TACSTD2	P09758	ENSG00000184292	tumor associated calcium signal transducer 2 [Source:HGNC Symbol;Acc:HGNC:11530]	TRUE	OID44304	NA	batch_2	NA	TRUE	TRUE
TSSC4	Q9Y5U2	ENSG00000184281	tumor suppressing subtransferable candidate 4 [Source:HGNC Symbol;Acc:HGNC:12386]	TRUE	OID41968	NA	batch_2	NA	TRUE	TRUE
ALDH1A3	P47895	ENSG00000184254	aldehyde dehydrogenase 1 family member A3 [Source:HGNC Symbol;Acc:HGNC:409]	TRUE	OID40784	NA	batch_2	NA	TRUE	FALSE
OAF	Q86UD1	ENSG00000184232	out at first homolog [Source:HGNC Symbol;Acc:HGNC:28752]	TRUE	OID45206	NA	batch_2	NA	TRUE	TRUE
PCDH9	Q9HC56	ENSG00000184226	protocadherin 9 [Source:HGNC Symbol;Acc:HGNC:8661]	TRUE	OID44078	NA	batch_2	NA	TRUE	TRUE
IRAK1	P51617	ENSG00000184216	interleukin 1 receptor associated kinase 1 [Source:HGNC Symbol;Acc:HGNC:6112]	TRUE	OID42636	OID20485	batch_1+2	MedianCentering	TRUE	TRUE
GOLGA6L4_GOLGA6L9_GOLGA6L10	A6NEF3_A6NEM1_A6NI86	ENSG00000184206, ENSG00000197978, ENSG00000278662	golgin A6 family like 4 [Source:HGNC Symbol;Acc:HGNC:27256], golgin A6 family like 9 [Source:HGNC Symbol;Acc:HGNC:37229], golgin A6 family like 10 [Source:HGNC Symbol;Acc:HGNC:37228]	FALSE	OID40271	NA	batch_2	NA	TRUE	FALSE
PPP1R2	P41236	ENSG00000184203	protein phosphatase 1 regulatory inhibitor subunit 2 [Source:HGNC Symbol;Acc:HGNC:9288]	TRUE	OID44866	OID20176	batch_1+2	MedianCentering	TRUE	TRUE
CRELD2	Q6UXH1	ENSG00000184164	cysteine rich with EGF like domains 2 [Source:HGNC Symbol;Acc:HGNC:28150]	TRUE	OID44568	OID20751	batch_1+2	QuantileSmoothing	TRUE	TRUE
CNTN2	Q02246	ENSG00000184144	contactin 2 [Source:HGNC Symbol;Acc:HGNC:2172]	TRUE	OID43548	NA	batch_2	NA	TRUE	FALSE
FAM120C	Q9NX05	ENSG00000184083	family with sequence similarity 120 member C [Source:HGNC Symbol;Acc:HGNC:16949]	TRUE	OID40216	NA	batch_2	NA	TRUE	FALSE
DIABLO	Q9NR28	ENSG00000184047	diablo IAP-binding mitochondrial protein [Source:HGNC Symbol;Acc:HGNC:21528]	TRUE	OID44602	OID20184	batch_1+2	QuantileSmoothing	TRUE	TRUE
MAGEA13P	A6NCF6	ENSG00000183981	MAGE family member A13, pseudogene [Source:HGNC Symbol;Acc:HGNC:35154]	TRUE	OID41441	NA	batch_2	NA	TRUE	TRUE
SMTN	P53814	ENSG00000183963	smoothelin [Source:HGNC Symbol;Acc:HGNC:11126]	TRUE	OID44264	NA	batch_2	NA	TRUE	TRUE
KMT5A	Q9NQR1	ENSG00000183955	lysine methyltransferase 5A [Source:HGNC Symbol;Acc:HGNC:29489]	TRUE	OID41395	NA	batch_2	NA	TRUE	FALSE
SH2D1A	O60880	ENSG00000183918	SH2 domain containing 1A [Source:HGNC Symbol;Acc:HGNC:10820]	TRUE	OID44239	OID20514	batch_1+2	QuantileSmoothing	TRUE	TRUE
TTC32	Q5I0X7	ENSG00000183891	tetratricopeptide repeat domain 32 [Source:HGNC Symbol;Acc:HGNC:32954]	TRUE	OID43251	NA	batch_2	NA	TRUE	TRUE
KIRREL1	Q96J84	ENSG00000183853	kirre like nephrin family adhesion molecule 1 [Source:HGNC Symbol;Acc:HGNC:15734]	TRUE	OID42674	NA	batch_2	NA	TRUE	TRUE
FAM3B	P58499	ENSG00000183844	FAM3 metabolism regulating signaling molecule B [Source:HGNC Symbol;Acc:HGNC:1253]	TRUE	OID43700	NA	batch_2	NA	TRUE	TRUE
ANKRD45	Q5TZF3	ENSG00000183831	ankyrin repeat domain 45 [Source:HGNC Symbol;Acc:HGNC:24786]	TRUE	OID40020	NA	batch_2	NA	TRUE	FALSE
NUDT14	O95848	ENSG00000183828	nudix hydrolase 14 [Source:HGNC Symbol;Acc:HGNC:20141]	TRUE	OID41565	NA	batch_2	NA	TRUE	FALSE
BTBD9	Q96Q07	ENSG00000183826	BTB domain containing 9 [Source:HGNC Symbol;Acc:HGNC:21228]	TRUE	OID40877	NA	batch_2	NA	TRUE	FALSE
LIN9	Q5TKA1	ENSG00000183814	lin-9 DREAM MuvB core complex component [Source:HGNC Symbol;Acc:HGNC:30830]	TRUE	OID40366	NA	batch_2	NA	TRUE	FALSE
DOCK8-AS1	Q5T8R8	ENSG00000183784	DOCK8 antisense RNA 1 [Source:HGNC Symbol;Acc:HGNC:26436]	TRUE	OID41120	NA	batch_2	NA	TRUE	FALSE
KCTD8	Q6ZWB6	ENSG00000183783	potassium channel tetramerization domain containing 8 [Source:HGNC Symbol;Acc:HGNC:22394]	TRUE	OID41365	NA	batch_2	NA	TRUE	FALSE
KCTD16	Q68DU8	ENSG00000183775	potassium channel tetramerization domain containing 16 [Source:HGNC Symbol;Acc:HGNC:29244]	TRUE	OID41362	NA	batch_2	NA	TRUE	TRUE
CHEK2	O96017	ENSG00000183765	checkpoint kinase 2 [Source:HGNC Symbol;Acc:HGNC:16627]	TRUE	OID41012	NA	batch_2	NA	FALSE	FALSE
MACC1	Q6ZN28	ENSG00000183742	MET transcriptional regulator MACC1 [Source:HGNC Symbol;Acc:HGNC:30215]	TRUE	OID40381	NA	batch_2	NA	TRUE	FALSE
ASCL2	Q99929	ENSG00000183734	achaete-scute family bHLH transcription factor 2 [Source:HGNC Symbol;Acc:HGNC:739]	TRUE	OID40831	NA	batch_2	NA	TRUE	TRUE
IFNL2	Q8IZJ0	ENSG00000183709	interferon lambda 2 [Source:HGNC Symbol;Acc:HGNC:18364]	TRUE	OID42587	NA	batch_2	NA	TRUE	FALSE
NOG	Q13253	ENSG00000183691	noggin [Source:HGNC Symbol;Acc:HGNC:7866]	TRUE	OID42840	NA	batch_2	NA	TRUE	TRUE
ALYREF	Q86V81	ENSG00000183684	Aly/REF export factor [Source:HGNC Symbol;Acc:HGNC:19071]	TRUE	OID40787	NA	batch_2	NA	TRUE	TRUE
TAFA1	Q7Z5A9	ENSG00000183662	TAFA chemokine like family member 1 [Source:HGNC Symbol;Acc:HGNC:21587]	TRUE	OID41905	NA	batch_2	NA	TRUE	FALSE
HOATZ	Q6PI97	ENSG00000183644	HOATZ cilia and flagella associated protein [Source:HGNC Symbol;Acc:HGNC:25061]	TRUE	OID41297	NA	batch_2	NA	TRUE	FALSE
PRR32	B1ATL7	ENSG00000183631	proline rich 32 [Source:HGNC Symbol;Acc:HGNC:34498]	TRUE	OID41672	NA	batch_2	NA	TRUE	TRUE
DGCR6	Q14129	ENSG00000183628	DiGeorge syndrome critical region gene 6 [Source:HGNC Symbol;Acc:HGNC:2846]	TRUE	OID42371	NA	batch_2	NA	TRUE	FALSE
FBXL7	Q9UJT9	ENSG00000183580	F-box and leucine rich repeat protein 7 [Source:HGNC Symbol;Acc:HGNC:13604]	TRUE	OID40233	NA	batch_2	NA	TRUE	FALSE
ACSM5	Q6NUN0	ENSG00000183549	acyl-CoA synthetase medium chain family member 5 [Source:HGNC Symbol;Acc:HGNC:26060]	TRUE	OID40005	NA	batch_2	NA	TRUE	FALSE
PRR14L	Q5THK1	ENSG00000183530	proline rich 14 like [Source:HGNC Symbol;Acc:HGNC:28738]	TRUE	OID41669	NA	batch_2	NA	TRUE	FALSE
PSMG1	O95456	ENSG00000183527	proteasome assembly chaperone 1 [Source:HGNC Symbol;Acc:HGNC:3043]	TRUE	OID42961	NA	batch_2	NA	TRUE	TRUE
MEX3B	Q6ZN04	ENSG00000183496	mex-3 RNA binding family member B [Source:HGNC Symbol;Acc:HGNC:25297]	TRUE	OID41468	NA	batch_2	NA	TRUE	FALSE
EP400	Q96L91	ENSG00000183495	E1A binding protein p400 [Source:HGNC Symbol;Acc:HGNC:11958]	TRUE	OID40200	NA	batch_2	NA	TRUE	FALSE
SH2D7	A6NKC9	ENSG00000183476	SH2 domain containing 7 [Source:HGNC Symbol;Acc:HGNC:34549]	TRUE	OID41791	NA	batch_2	NA	TRUE	FALSE
URAD	A6NGE7	ENSG00000183463	ureidoimidazoline (2-oxo-4-hydroxy-4-carboxy-5-) decarboxylase [Source:HGNC Symbol;Acc:HGNC:17785]	TRUE	OID41999	NA	batch_2	NA	TRUE	FALSE
TFDP3	Q5H9I0	ENSG00000183434	transcription factor Dp family member 3 [Source:HGNC Symbol;Acc:HGNC:24603]	TRUE	OID41932	NA	batch_2	NA	TRUE	FALSE
RIPK4	P57078	ENSG00000183421	receptor interacting serine/threonine kinase 4 [Source:HGNC Symbol;Acc:HGNC:496]	TRUE	OID43015	NA	batch_2	NA	TRUE	FALSE
PMCH	P20382	ENSG00000183395	pro-melanin concentrating hormone [Source:HGNC Symbol;Acc:HGNC:9109]	TRUE	OID44105	NA	batch_2	NA	TRUE	FALSE
GBP6	Q6ZN66	ENSG00000183347	guanylate binding protein family member 6 [Source:HGNC Symbol;Acc:HGNC:25395]	TRUE	OID42501	NA	batch_2	NA	TRUE	FALSE
BOLA2	Q9H3K6	ENSG00000183336	bolA family member 2 [Source:HGNC Symbol;Acc:HGNC:29488]	TRUE	OID43421	NA	batch_2	NA	TRUE	TRUE
CCDC125	Q86Z20	ENSG00000183323	coiled-coil domain containing 125 [Source:HGNC Symbol;Acc:HGNC:28924]	TRUE	OID40933	NA	batch_2	NA	TRUE	FALSE
EPHA10	Q5JZY3	ENSG00000183317	EPH receptor A10 [Source:HGNC Symbol;Acc:HGNC:19987]	TRUE	OID42419	NA	batch_2	NA	TRUE	FALSE
CCBE1	Q6UXH8	ENSG00000183287	collagen and calcium binding EGF domains 1 [Source:HGNC Symbol;Acc:HGNC:29426]	TRUE	OID44493	NA	batch_2	NA	TRUE	TRUE
RIMBP3C_RIMBP3	A6NJZ7_Q9UFD9	ENSG00000183246, ENSG00000275793	RIMS binding protein 3C [Source:HGNC Symbol;Acc:HGNC:33892], RIMS binding protein 3 [Source:HGNC Symbol;Acc:HGNC:29344]	FALSE	OID40565	NA	batch_2	NA	TRUE	FALSE
CTNNA3	Q9UI47	ENSG00000183230	catenin alpha 3 [Source:HGNC Symbol;Acc:HGNC:2511]	TRUE	OID40138	NA	batch_2	NA	TRUE	FALSE
POTEC	B2RU33	ENSG00000183206	POTE ankyrin domain family member C [Source:HGNC Symbol;Acc:HGNC:33894]	TRUE	OID41645	NA	batch_2	NA	TRUE	FALSE
C2CD4C	Q8TF44	ENSG00000183186	C2 calcium dependent domain containing 4C [Source:HGNC Symbol;Acc:HGNC:29417]	TRUE	OID40076	NA	batch_2	NA	TRUE	TRUE
POM121L1P	Q3SYA9	ENSG00000183169	POM121 transmembrane nucleoporin like 1, pseudogene [Source:HGNC Symbol;Acc:HGNC:16439]	TRUE	OID40518	NA	batch_2	NA	TRUE	FALSE
CEP57L1	Q8IYX8	ENSG00000183137	centrosomal protein 57 like 1 [Source:HGNC Symbol;Acc:HGNC:21561]	TRUE	OID40992	NA	batch_2	NA	TRUE	FALSE
NEB	P20929	ENSG00000183091	nebulin [Source:HGNC Symbol;Acc:HGNC:7720]	TRUE	OID42817	NA	batch_2	NA	TRUE	TRUE
GAS6	Q14393	ENSG00000183087	growth arrest specific 6 [Source:HGNC Symbol;Acc:HGNC:4168]	TRUE	OID45130	OID20318	batch_1+2	QuantileSmoothing	TRUE	TRUE
WBP2NL	Q6ICG8	ENSG00000183066	WBP2 N-terminal like [Source:HGNC Symbol;Acc:HGNC:28389]	TRUE	OID42017	NA	batch_2	NA	TRUE	FALSE
MCEMP1	Q8IX19	ENSG00000183019	mast cell expressed membrane protein 1 [Source:HGNC Symbol;Acc:HGNC:27291]	TRUE	OID43963	NA	batch_2	NA	TRUE	TRUE
CNOT10	Q9H9A5	ENSG00000182973	CCR4-NOT transcription complex subunit 10 [Source:HGNC Symbol;Acc:HGNC:23817]	TRUE	OID41039	NA	batch_2	NA	TRUE	FALSE
SRPRA	P08240	ENSG00000182934	SRP receptor subunit alpha [Source:HGNC Symbol;Acc:HGNC:11307]	TRUE	OID41865	NA	batch_2	NA	TRUE	FALSE
TCHHL1	Q5QJ38	ENSG00000182898	trichohyalin like 1 [Source:HGNC Symbol;Acc:HGNC:31796]	TRUE	OID41920	NA	batch_2	NA	TRUE	FALSE
ADGRG3	Q86Y34	ENSG00000182885	adhesion G protein-coupled receptor G3 [Source:HGNC Symbol;Acc:HGNC:13728]	TRUE	OID42092	NA	batch_2	NA	TRUE	FALSE
COL18A1	P39060	ENSG00000182871	collagen type XVIII alpha 1 chain [Source:HGNC Symbol;Acc:HGNC:2195]	TRUE	OID45082	OID20332	batch_1+2	QuantileSmoothing	TRUE	TRUE
LCK	P06239	ENSG00000182866	LCK proto-oncogene, Src family tyrosine kinase [Source:HGNC Symbol;Acc:HGNC:6524]	TRUE	OID41409	NA	batch_2	NA	TRUE	TRUE
VMO1	Q7Z5L0	ENSG00000182853	vitelline membrane outer layer 1 homolog [Source:HGNC Symbol;Acc:HGNC:30387]	TRUE	OID44393	NA	batch_2	NA	TRUE	FALSE
RRP7BP	Q9NSQ0	ENSG00000182841, ENSG00000291035	ribosomal RNA processing 7 homolog B, pseudogene [Source:HGNC Symbol;Acc:HGNC:30454]	TRUE	OID40581	NA	batch_2	NA	TRUE	FALSE
CRIP2	P52943	ENSG00000182809	cysteine rich protein 2 [Source:HGNC Symbol;Acc:HGNC:2361]	TRUE	OID43563	NA	batch_2	NA	TRUE	TRUE
NGRN	Q9NPE2	ENSG00000182768	neugrin, neurite outgrowth associated [Source:HGNC Symbol;Acc:HGNC:18077]	TRUE	OID44030	NA	batch_2	NA	TRUE	FALSE
PAPPA	Q13219	ENSG00000182752	pappalysin 1 [Source:HGNC Symbol;Acc:HGNC:8602]	TRUE	OID42880	NA	batch_2	NA	FALSE	FALSE
HOXB4	P17483	ENSG00000182742	homeobox B4 [Source:HGNC Symbol;Acc:HGNC:5115]	TRUE	OID41300	NA	batch_2	NA	TRUE	FALSE
RGS6	P49758	ENSG00000182732	regulator of G protein signaling 6 [Source:HGNC Symbol;Acc:HGNC:10002]	TRUE	OID41719	NA	batch_2	NA	TRUE	TRUE
ANXA2	P07355	ENSG00000182718	annexin A2 [Source:HGNC Symbol;Acc:HGNC:537]	TRUE	OID43369	NA	batch_2	NA	TRUE	TRUE
PPP1R27	Q86WC6	ENSG00000182676	protein phosphatase 1 regulatory subunit 27 [Source:HGNC Symbol;Acc:HGNC:16813]	TRUE	OID42932	NA	batch_2	NA	TRUE	FALSE
CCDC172	P0C7W6	ENSG00000182645	coiled-coil domain containing 172 [Source:HGNC Symbol;Acc:HGNC:30524]	TRUE	OID40091	NA	batch_2	NA	TRUE	FALSE
CCNYL2	Q5T2Q4	ENSG00000182632	cyclin Y like 2 (pseudogene) [Source:HGNC Symbol;Acc:HGNC:23495]	TRUE	OID40964	NA	batch_2	NA	TRUE	FALSE
PLCB1	Q9NQ66	ENSG00000182621	phospholipase C beta 1 [Source:HGNC Symbol;Acc:HGNC:15917]	TRUE	OID42914	NA	batch_2	NA	TRUE	FALSE
TRAK1	Q9UPV9	ENSG00000182606	trafficking kinesin protein 1 [Source:HGNC Symbol;Acc:HGNC:29947]	TRUE	OID43234	NA	batch_2	NA	TRUE	FALSE
EPGN	Q6UW88	ENSG00000182585	epithelial mitogen [Source:HGNC Symbol;Acc:HGNC:17470]	TRUE	OID43681	NA	batch_2	NA	TRUE	TRUE
CSF1R	P07333	ENSG00000182578	colony stimulating factor 1 receptor [Source:HGNC Symbol;Acc:HGNC:2433]	TRUE	OID45343	NA	batch_2	NA	TRUE	TRUE
NXPH3	O95157	ENSG00000182575	neurexophilin 3 [Source:HGNC Symbol;Acc:HGNC:8077]	TRUE	OID44052	NA	batch_2	NA	TRUE	TRUE
SATB1	Q01826	ENSG00000182568	SATB homeobox 1 [Source:HGNC Symbol;Acc:HGNC:10541]	TRUE	OID44207	NA	batch_2	NA	TRUE	TRUE
CLEC4G	Q6UXB4	ENSG00000182566	C-type lectin domain family 4 member G [Source:HGNC Symbol;Acc:HGNC:24591]	TRUE	OID43537	OID20590	batch_1+2	MedianCentering	TRUE	TRUE
ADI1	Q9BV57	ENSG00000182551	acireductone dioxygenase 1 [Source:HGNC Symbol;Acc:HGNC:30576]	TRUE	OID42094	NA	batch_2	NA	TRUE	TRUE
RNASE10	Q5GAN6	ENSG00000182545	ribonuclease A family member 10 (inactive) [Source:HGNC Symbol;Acc:HGNC:19275]	TRUE	OID44186	NA	batch_2	NA	TRUE	TRUE
TBPL2	Q6SJ96	ENSG00000182521	TATA-box binding protein like 2 [Source:HGNC Symbol;Acc:HGNC:19841]	TRUE	OID40648	NA	batch_2	NA	TRUE	FALSE
GLRX5	Q86SX6	ENSG00000182512	glutaredoxin 5 [Source:HGNC Symbol;Acc:HGNC:20134]	TRUE	OID44686	NA	batch_2	NA	TRUE	FALSE
FES	P07332	ENSG00000182511	FES proto-oncogene, tyrosine kinase [Source:HGNC Symbol;Acc:HGNC:3657]	TRUE	OID42455	NA	batch_2	NA	TRUE	FALSE
CEP97	Q8IW35	ENSG00000182504	centrosomal protein 97 [Source:HGNC Symbol;Acc:HGNC:26244]	TRUE	OID40995	NA	batch_2	NA	TRUE	FALSE
BGN	P21810	ENSG00000182492	biglycan [Source:HGNC Symbol;Acc:HGNC:1044]	TRUE	OID42181	NA	batch_2	NA	TRUE	TRUE
EXOC7	Q9UPT5	ENSG00000182473	exocyst complex component 7 [Source:HGNC Symbol;Acc:HGNC:23214]	TRUE	OID41176	NA	batch_2	NA	TRUE	FALSE
TSHZ2	Q9NRE2	ENSG00000182463	teashirt zinc finger homeobox 2 [Source:HGNC Symbol;Acc:HGNC:13010]	TRUE	OID41963	NA	batch_2	NA	TRUE	FALSE
IFNL1	Q8IU54	ENSG00000182393	interferon lambda 1 [Source:HGNC Symbol;Acc:HGNC:18363]	TRUE	OID42586	NA	batch_2	NA	TRUE	FALSE
CACNB4	O00305	ENSG00000182389	calcium voltage-gated channel auxiliary subunit beta 4 [Source:HGNC Symbol;Acc:HGNC:1404]	TRUE	OID40083	NA	batch_2	NA	TRUE	FALSE
LIPF	P07098	ENSG00000182333	lipase F, gastric type [Source:HGNC Symbol;Acc:HGNC:6622]	TRUE	OID43924	NA	batch_2	NA	TRUE	FALSE
C1S	P09871	ENSG00000182326	complement C1s [Source:HGNC Symbol;Acc:HGNC:1247]	TRUE	OID45444	NA	batch_2	NA	TRUE	TRUE
C8orf33	Q9H7E9	ENSG00000182307	chromosome 8 open reading frame 33 [Source:HGNC Symbol;Acc:HGNC:26104]	TRUE	OID40912	NA	batch_2	NA	TRUE	FALSE
IZUMO1	Q8IYV9	ENSG00000182264	izumo sperm-oocyte fusion 1 [Source:HGNC Symbol;Acc:HGNC:28539]	TRUE	OID41349	NA	batch_2	NA	TRUE	FALSE
FIGN	Q5HY92	ENSG00000182263	fidgetin, microtubule severing factor [Source:HGNC Symbol;Acc:HGNC:13285]	TRUE	OID41211	NA	batch_2	NA	TRUE	FALSE
SYNM	O15061	ENSG00000182253	synemin [Source:HGNC Symbol;Acc:HGNC:24466]	TRUE	OID43153	NA	batch_2	NA	TRUE	TRUE
UBE2E2	Q96LR5	ENSG00000182247	ubiquitin conjugating enzyme E2 E2 [Source:HGNC Symbol;Acc:HGNC:12478]	TRUE	OID40691	NA	batch_2	NA	TRUE	FALSE
ATP6AP2	O75787	ENSG00000182220	ATPase H+ transporting accessory protein 2 [Source:HGNC Symbol;Acc:HGNC:18305]	TRUE	OID42162	NA	batch_2	NA	TRUE	FALSE
SHMT2	P34897	ENSG00000182199	serine hydroxymethyltransferase 2 [Source:HGNC Symbol;Acc:HGNC:10852]	TRUE	OID44931	NA	batch_2	NA	TRUE	TRUE
MRPS16	Q9Y3D3	ENSG00000182180	mitochondrial ribosomal protein S16 [Source:HGNC Symbol;Acc:HGNC:14048]	TRUE	OID42776	NA	batch_2	NA	TRUE	FALSE
RGMA	Q96B86	ENSG00000182175	repulsive guidance molecule BMP co-receptor a [Source:HGNC Symbol;Acc:HGNC:30308]	TRUE	OID44894	NA	batch_2	NA	TRUE	TRUE
ENPP7	Q6UWV6	ENSG00000182156	ectonucleotide pyrophosphatase/phosphodiesterase 7 [Source:HGNC Symbol;Acc:HGNC:23764]	TRUE	OID44628	OID20689	batch_1+2	MedianCentering	TRUE	TRUE
IST1	P53990	ENSG00000182149	IST1 factor associated with ESCRT-III [Source:HGNC Symbol;Acc:HGNC:28977]	TRUE	OID43874	NA	batch_2	NA	TRUE	TRUE
TDRKH	Q9Y2W6	ENSG00000182134	tudor and KH domain containing [Source:HGNC Symbol;Acc:HGNC:11713]	TRUE	OID43170	NA	batch_2	NA	TRUE	FALSE
TNRC18	O15417	ENSG00000182095	trinucleotide repeat containing 18 [Source:HGNC Symbol;Acc:HGNC:11962]	TRUE	OID43211	NA	batch_2	NA	TRUE	FALSE
USH1G	Q495M9	ENSG00000182040	USH1 protein network component sans [Source:HGNC Symbol;Acc:HGNC:16356]	TRUE	OID42001	NA	batch_2	NA	TRUE	FALSE
PNMA8A	Q86V59	ENSG00000182013	PNMA family member 8A [Source:HGNC Symbol;Acc:HGNC:25578]	TRUE	OID41636	NA	batch_2	NA	TRUE	FALSE
RTKN2	Q8IZC4	ENSG00000182010	rhotekin 2 [Source:HGNC Symbol;Acc:HGNC:19364]	TRUE	OID43037	NA	batch_2	NA	TRUE	FALSE
GOLGA8CP	A6NN73	ENSG00000181984	golgin A8 family member C, pseudogene [Source:HGNC Symbol;Acc:HGNC:32375]	TRUE	OID40272	NA	batch_2	NA	TRUE	FALSE
C5orf24	Q7Z6I8	ENSG00000181904	chromosome 5 open reading frame 24 [Source:HGNC Symbol;Acc:HGNC:26746]	TRUE	OID40907	NA	batch_2	NA	TRUE	FALSE
RNF41	Q9H4P4	ENSG00000181852	ring finger protein 41 [Source:HGNC Symbol;Acc:HGNC:18401]	TRUE	OID43021	NA	batch_2	NA	TRUE	TRUE
TIGIT	Q495A1	ENSG00000181847	T cell immunoreceptor with Ig and ITIM domains [Source:HGNC Symbol;Acc:HGNC:26838]	TRUE	OID43191	NA	batch_2	NA	TRUE	FALSE
LINC00471	Q8N535	ENSG00000181798	long intergenic non-protein coding RNA 471 [Source:HGNC Symbol;Acc:HGNC:28668]	TRUE	OID40368	NA	batch_2	NA	TRUE	TRUE
ADGRB1	O14514	ENSG00000181790	adhesion G protein-coupled receptor B1 [Source:HGNC Symbol;Acc:HGNC:943]	TRUE	OID43334	NA	batch_2	NA	TRUE	TRUE
ZBTB20	Q9HC78	ENSG00000181722	zinc finger and BTB domain containing 20 [Source:HGNC Symbol;Acc:HGNC:13503]	TRUE	OID40724	NA	batch_2	NA	TRUE	FALSE
TNFSF15	O95150	ENSG00000181634	TNF superfamily member 15 [Source:HGNC Symbol;Acc:HGNC:11931]	TRUE	OID43207	NA	batch_2	NA	TRUE	TRUE
GPR135	Q8IZ08	ENSG00000181619	G protein-coupled receptor 135 [Source:HGNC Symbol;Acc:HGNC:19991]	TRUE	OID40274	NA	batch_2	NA	TRUE	FALSE
MEX3D	Q86XN8	ENSG00000181588	mex-3 RNA binding family member D [Source:HGNC Symbol;Acc:HGNC:16734]	TRUE	OID41469	NA	batch_2	NA	TRUE	FALSE
EDDM3B	P56851	ENSG00000181552	epididymal protein 3B [Source:HGNC Symbol;Acc:HGNC:19223]	TRUE	OID43651	NA	batch_2	NA	TRUE	FALSE
SGSH	P51688	ENSG00000181523	N-sulfoglucosamine sulfohydrolase [Source:HGNC Symbol;Acc:HGNC:10818]	TRUE	OID44928	NA	batch_2	NA	TRUE	TRUE
RNF135	Q8IUD6	ENSG00000181481	ring finger protein 135 [Source:HGNC Symbol;Acc:HGNC:21158]	TRUE	OID40568	NA	batch_2	NA	TRUE	TRUE
SOX2	P48431	ENSG00000181449	SRY-box transcription factor 2 [Source:HGNC Symbol;Acc:HGNC:11195]	TRUE	OID43115	NA	batch_2	NA	TRUE	FALSE
SAGE1	Q9NXZ1	ENSG00000181433	sarcoma antigen 1 [Source:HGNC Symbol;Acc:HGNC:30369]	TRUE	OID40583	NA	batch_2	NA	TRUE	FALSE
DDX60L	Q5H9U9	ENSG00000181381	DExD/H-box 60 like [Source:HGNC Symbol;Acc:HGNC:26429]	TRUE	OID41092	NA	batch_2	NA	TRUE	FALSE
CCL13	Q99616	ENSG00000181374	C-C motif chemokine ligand 13 [Source:HGNC Symbol;Acc:HGNC:10611]	TRUE	OID44495	OID20655	batch_1+2	MedianCentering	TRUE	TRUE
LRRC75A	Q8NAA5	ENSG00000181350	leucine rich repeat containing 75A [Source:HGNC Symbol;Acc:HGNC:32403]	TRUE	OID40377	NA	batch_2	NA	TRUE	FALSE
ZNF746	Q6NUN9	ENSG00000181220	zinc finger protein 746 [Source:HGNC Symbol;Acc:HGNC:21948]	TRUE	OID42069	NA	batch_2	NA	TRUE	FALSE
PENK	P01210	ENSG00000181195	proenkephalin [Source:HGNC Symbol;Acc:HGNC:8831]	TRUE	OID44844	NA	batch_2	NA	TRUE	FALSE
PJA1	Q8NG27	ENSG00000181191	praja ring finger ubiquitin ligase 1 [Source:HGNC Symbol;Acc:HGNC:16648]	TRUE	OID41618	NA	batch_2	NA	TRUE	FALSE
NPM1	P06748	ENSG00000181163	nucleophosmin 1 [Source:HGNC Symbol;Acc:HGNC:7910]	TRUE	OID44037	NA	batch_2	NA	TRUE	FALSE
MUC16	Q8WXI7	ENSG00000181143	mucin 16, cell surface associated [Source:HGNC Symbol;Acc:HGNC:15582]	TRUE	OID43999	NA	batch_2	NA	TRUE	TRUE
F2R	P25116	ENSG00000181104	coagulation factor II thrombin receptor [Source:HGNC Symbol;Acc:HGNC:3537]	TRUE	OID44640	OID20691	batch_1+2	MedianCentering	TRUE	TRUE
EHMT1	Q9H9B1	ENSG00000181090	euchromatic histone lysine methyltransferase 1 [Source:HGNC Symbol;Acc:HGNC:24650]	TRUE	OID40188	NA	batch_2	NA	TRUE	TRUE
CHRM2	P08172	ENSG00000181072	cholinergic receptor muscarinic 2 [Source:HGNC Symbol;Acc:HGNC:1951]	TRUE	OID41015	NA	batch_2	NA	TRUE	FALSE
FCRL6	Q6DN72	ENSG00000181036	Fc receptor like 6 [Source:HGNC Symbol;Acc:HGNC:31910]	TRUE	OID43706	OID20529	batch_1+2	MedianCentering	TRUE	TRUE
RPH3AL	Q9UNE2	ENSG00000181031	rabphilin 3A like (without C2 domains) [Source:HGNC Symbol;Acc:HGNC:10296]	TRUE	OID41743	NA	batch_2	NA	TRUE	FALSE
NQO1	P15559	ENSG00000181019	NAD(P)H quinone dehydrogenase 1 [Source:HGNC Symbol;Acc:HGNC:2874]	TRUE	OID42849	NA	batch_2	NA	TRUE	FALSE
ZNF572	Q7Z3I7	ENSG00000180938	zinc finger protein 572 [Source:HGNC Symbol;Acc:HGNC:26758]	TRUE	OID43304	NA	batch_2	NA	TRUE	FALSE
KCTD2	Q14681	ENSG00000180901	potassium channel tetramerization domain containing 2 [Source:HGNC Symbol;Acc:HGNC:21294]	TRUE	OID41364	NA	batch_2	NA	TRUE	FALSE
SCRIB	Q14160	ENSG00000180900	scribble planar cell polarity protein [Source:HGNC Symbol;Acc:HGNC:30377]	TRUE	OID44217	NA	batch_2	NA	TRUE	TRUE
CUEDC1	Q9NWM3	ENSG00000180891	CUE domain containing 1 [Source:HGNC Symbol;Acc:HGNC:31350]	TRUE	OID41066	NA	batch_2	NA	TRUE	TRUE
DEFB112	Q30KQ8	ENSG00000180872	defensin beta 112 [Source:HGNC Symbol;Acc:HGNC:18093]	TRUE	OID42366	NA	batch_2	NA	TRUE	FALSE
MAP6D1	Q9H9H5	ENSG00000180834	MAP6 domain containing 1 [Source:HGNC Symbol;Acc:HGNC:25753]	TRUE	OID41448	NA	batch_2	NA	TRUE	FALSE
PSMG4	Q5JS54	ENSG00000180822	proteasome assembly chaperone 4 [Source:HGNC Symbol;Acc:HGNC:21108]	TRUE	OID44140	NA	batch_2	NA	TRUE	TRUE
YOD1	Q5VVQ6	ENSG00000180667	YOD1 deubiquitinase [Source:HGNC Symbol;Acc:HGNC:25035]	TRUE	OID44421	NA	batch_2	NA	TRUE	FALSE
TSPYL5	Q86VY4	ENSG00000180543	TSPY like 5 [Source:HGNC Symbol;Acc:HGNC:29367]	TRUE	OID41967	NA	batch_2	NA	TRUE	FALSE
BHLHA15	Q7RTS1	ENSG00000180535	basic helix-loop-helix family member a15 [Source:HGNC Symbol;Acc:HGNC:22265]	TRUE	OID40052	NA	batch_2	NA	TRUE	FALSE
KCNE1	P15382	ENSG00000180509	potassium voltage-gated channel subfamily E regulatory subunit 1 [Source:HGNC Symbol;Acc:HGNC:6240]	TRUE	OID41360	NA	batch_2	NA	TRUE	FALSE
ARHGAP45	Q92619	ENSG00000180448	Rho GTPase activating protein 45 [Source:HGNC Symbol;Acc:HGNC:17102]	TRUE	OID44469	NA	batch_2	NA	TRUE	FALSE
GAS1	P54826	ENSG00000180447	growth arrest specific 1 [Source:HGNC Symbol;Acc:HGNC:4165]	TRUE	OID41234	NA	batch_2	NA	TRUE	FALSE
MCFD2	Q8NI22	ENSG00000180398	multiple coagulation factor deficiency 2, ER cargo receptor complex subunit [Source:HGNC Symbol;Acc:HGNC:18451]	TRUE	OID44771	OID20171	batch_1+2	MedianCentering	TRUE	TRUE
CCDC66	A2RUB6	ENSG00000180376	coiled-coil domain containing 66 [Source:HGNC Symbol;Acc:HGNC:27709]	TRUE	OID40954	NA	batch_2	NA	TRUE	FALSE
HCLS1	P14317	ENSG00000180353	hematopoietic cell-specific Lyn substrate 1 [Source:HGNC Symbol;Acc:HGNC:4844]	TRUE	OID43794	OID20648	batch_1+2	QuantileSmoothing	TRUE	TRUE
MEIOC	A2RUB1	ENSG00000180336	meiosis specific with coiled-coil domain [Source:HGNC Symbol;Acc:HGNC:26670]	TRUE	OID41465	NA	batch_2	NA	TRUE	FALSE
CCDC43	Q96MW1	ENSG00000180329	coiled-coil domain containing 43 [Source:HGNC Symbol;Acc:HGNC:26472]	TRUE	OID40951	NA	batch_2	NA	TRUE	TRUE
PNPLA1	Q8N8W4	ENSG00000180316	patatin like domain 1, omega-hydroxyceramide transacylase [Source:HGNC Symbol;Acc:HGNC:21246]	TRUE	OID40517	NA	batch_2	NA	TRUE	FALSE
FGD6	Q6ZV73	ENSG00000180263	FYVE, RhoGEF and PH domain containing 6 [Source:HGNC Symbol;Acc:HGNC:21740]	TRUE	OID41209	NA	batch_2	NA	TRUE	FALSE
PRKRA	O75569	ENSG00000180228	protein activator of interferon induced protein kinase EIF2AK2 [Source:HGNC Symbol;Acc:HGNC:9438]	TRUE	OID42945	NA	batch_2	NA	TRUE	TRUE
F2	P00734	ENSG00000180210	coagulation factor II, thrombin [Source:HGNC Symbol;Acc:HGNC:3535]	TRUE	OID45463	NA	batch_2	NA	TRUE	FALSE
MYL11	Q96A32	ENSG00000180209	myosin light chain 11 [Source:HGNC Symbol;Acc:HGNC:29824]	TRUE	OID42793	NA	batch_2	NA	TRUE	TRUE
RCC1	P18754	ENSG00000180198	regulator of chromosome condensation 1 [Source:HGNC Symbol;Acc:HGNC:1913]	TRUE	OID43001	NA	batch_2	NA	TRUE	FALSE
TH	P07101	ENSG00000180176	tyrosine hydroxylase [Source:HGNC Symbol;Acc:HGNC:11782]	TRUE	OID40658	NA	batch_2	NA	TRUE	FALSE
GARIN5B	Q8N5Q1	ENSG00000180043	golgi associated RAB2 interactor family member 5B [Source:HGNC Symbol;Acc:HGNC:25278]	TRUE	OID41232	NA	batch_2	NA	TRUE	FALSE
DCTPP1	Q9H773	ENSG00000179958	dCTP pyrophosphatase 1 [Source:HGNC Symbol;Acc:HGNC:28777]	TRUE	OID44596	OID20148	batch_1+2	QuantileSmoothing	TRUE	TRUE
SSC5D	A1L4H1	ENSG00000179954	scavenger receptor cysteine rich family member with 5 domains [Source:HGNC Symbol;Acc:HGNC:26641]	TRUE	OID45415	OID20351	batch_1+2	MedianCentering	TRUE	TRUE
NRXN1	P58400	ENSG00000179915	neurexin 1 [Source:HGNC Symbol;Acc:HGNC:8008]	TRUE	OID42852	NA	batch_2	NA	TRUE	FALSE
CFAP276	Q5T5A4	ENSG00000179902	cilia and flagella associated protein 276 [Source:HGNC Symbol;Acc:HGNC:32331]	TRUE	OID41000	NA	batch_2	NA	TRUE	FALSE
RNF227	A6NIN4	ENSG00000179859	ring finger protein 227 [Source:HGNC Symbol;Acc:HGNC:27571]	TRUE	OID41736	NA	batch_2	NA	TRUE	TRUE
GIPC3	Q8TF64	ENSG00000179855	GIPC PDZ domain containing family member 3 [Source:HGNC Symbol;Acc:HGNC:18183]	TRUE	OID43755	NA	batch_2	NA	TRUE	TRUE
AKAP5	P24588	ENSG00000179841	A-kinase anchoring protein 5 [Source:HGNC Symbol;Acc:HGNC:375]	TRUE	OID40010	NA	batch_2	NA	TRUE	FALSE
SERTAD2	Q14140	ENSG00000179833	SERTA domain containing 2 [Source:HGNC Symbol;Acc:HGNC:30784]	TRUE	OID40593	NA	batch_2	NA	TRUE	FALSE
CDH5	P33151	ENSG00000179776	cadherin 5 [Source:HGNC Symbol;Acc:HGNC:1764]	TRUE	OID45064	OID20243	batch_1+2	QuantileSmoothing	TRUE	TRUE
FCER1A	P12319	ENSG00000179639	Fc epsilon receptor Ia [Source:HGNC Symbol;Acc:HGNC:3609]	TRUE	OID42447	NA	batch_2	NA	TRUE	FALSE
TPPP2	P59282	ENSG00000179636	tubulin polymerization promoting protein family member 2 [Source:HGNC Symbol;Acc:HGNC:19293]	TRUE	OID43224	NA	batch_2	NA	TRUE	FALSE
MAF1	Q9H063	ENSG00000179632	MAF1 homolog, negative regulator of RNA polymerase III [Source:HGNC Symbol;Acc:HGNC:24966]	TRUE	OID41439	NA	batch_2	NA	TRUE	TRUE
GCC1	Q96CN9	ENSG00000179562	GRIP and coiled-coil domain containing 1 [Source:HGNC Symbol;Acc:HGNC:19095]	TRUE	OID43744	NA	batch_2	NA	TRUE	TRUE
LBX2	Q6XYB7	ENSG00000179528	ladybird homeobox 2 [Source:HGNC Symbol;Acc:HGNC:15525]	TRUE	OID41407	NA	batch_2	NA	TRUE	FALSE
ZBTB18	Q99592	ENSG00000179456	zinc finger and BTB domain containing 18 [Source:HGNC Symbol;Acc:HGNC:13030]	TRUE	OID40723	NA	batch_2	NA	TRUE	FALSE
DNAJB8	Q8NHS0	ENSG00000179407	DnaJ heat shock protein family (Hsp40) member B8 [Source:HGNC Symbol;Acc:HGNC:23699]	TRUE	OID43620	OID20093	batch_1+2	QuantileSmoothing	TRUE	TRUE
VWA1	Q6PCB0	ENSG00000179403	von Willebrand factor A domain containing 1 [Source:HGNC Symbol;Acc:HGNC:30910]	TRUE	OID44402	NA	batch_2	NA	TRUE	TRUE
GPC5	P78333	ENSG00000179399	glypican 5 [Source:HGNC Symbol;Acc:HGNC:4453]	TRUE	OID43774	NA	batch_2	NA	TRUE	TRUE
PACS2	Q86VP3	ENSG00000179364	phosphofurin acidic cluster sorting protein 2 [Source:HGNC Symbol;Acc:HGNC:23794]	TRUE	OID44066	NA	batch_2	NA	TRUE	TRUE
HMGN2P46	Q86SG4	ENSG00000179362	high mobility group nucleosomal binding domain 2 pseudogene 46 [Source:HGNC Symbol;Acc:HGNC:26817]	TRUE	OID41295	NA	batch_2	NA	TRUE	FALSE
CLK3	P49761	ENSG00000179335	CDC like kinase 3 [Source:HGNC Symbol;Acc:HGNC:2071]	TRUE	OID41029	NA	batch_2	NA	TRUE	TRUE
RAB39A	Q14964	ENSG00000179331	RAB39A, member RAS oncogene family [Source:HGNC Symbol;Acc:HGNC:16521]	TRUE	OID41689	NA	batch_2	NA	TRUE	FALSE
PTPN11	Q06124	ENSG00000179295	protein tyrosine phosphatase non-receptor type 11 [Source:HGNC Symbol;Acc:HGNC:9644]	TRUE	OID41675	NA	batch_2	NA	TRUE	TRUE
GADD45GIP1	Q8TAE8	ENSG00000179271	GADD45G interacting protein 1 [Source:HGNC Symbol;Acc:HGNC:29996]	TRUE	OID43735	NA	batch_2	NA	TRUE	TRUE
PCARE	A6NGG8	ENSG00000179270	photoreceptor cilium actin regulator [Source:HGNC Symbol;Acc:HGNC:34383]	TRUE	OID42884	NA	batch_2	NA	TRUE	FALSE
SMCO3	A2RU48	ENSG00000179256	single-pass membrane protein with coiled-coil domains 3 [Source:HGNC Symbol;Acc:HGNC:34401]	TRUE	OID41821	NA	batch_2	NA	TRUE	FALSE
CDH4	P55283	ENSG00000179242	cadherin 4 [Source:HGNC Symbol;Acc:HGNC:1763]	TRUE	OID42251	NA	batch_2	NA	TRUE	FALSE
GVQW3	Q3ZCU0	ENSG00000179240	GVQW motif containing 3 [Source:HGNC Symbol;Acc:HGNC:51239]	TRUE	OID41276	NA	batch_2	NA	TRUE	FALSE
MAGED1	Q9Y5V3	ENSG00000179222	MAGE family member D1 [Source:HGNC Symbol;Acc:HGNC:6813]	TRUE	OID42728	NA	batch_2	NA	TRUE	FALSE
GGN	Q86UU5	ENSG00000179168	gametogenetin [Source:HGNC Symbol;Acc:HGNC:18869]	TRUE	OID42513	NA	batch_2	NA	TRUE	FALSE
FUCA1	P04066	ENSG00000179163	alpha-L-fucosidase 1 [Source:HGNC Symbol;Acc:HGNC:4006]	TRUE	OID45128	OID20261	batch_1+2	MedianCentering	TRUE	TRUE
GIMAP7	Q8NHV1	ENSG00000179144	GTPase, IMAP family member 7 [Source:HGNC Symbol;Acc:HGNC:22404]	TRUE	OID44682	NA	batch_2	NA	TRUE	TRUE
C10orf67	Q8IYJ2	ENSG00000179133	chromosome 10 open reading frame 67 [Source:HGNC Symbol;Acc:HGNC:28716]	TRUE	OID40070	NA	batch_2	NA	TRUE	FALSE
FARSA	Q9Y285	ENSG00000179115	phenylalanyl-tRNA synthetase subunit alpha [Source:HGNC Symbol;Acc:HGNC:3592]	TRUE	OID42444	NA	batch_2	NA	TRUE	TRUE
HES7	Q9BYE0	ENSG00000179111	hes family bHLH transcription factor 7 [Source:HGNC Symbol;Acc:HGNC:15977]	TRUE	OID41290	NA	batch_2	NA	TRUE	FALSE
C12orf42	Q96LP6	ENSG00000179088	chromosome 12 open reading frame 42 [Source:HGNC Symbol;Acc:HGNC:24729]	TRUE	OID40072	NA	batch_2	NA	TRUE	FALSE
CCDC89	Q8N998	ENSG00000179071	coiled-coil domain containing 89 [Source:HGNC Symbol;Acc:HGNC:26762]	TRUE	OID40958	NA	batch_2	NA	TRUE	FALSE
IGSF22	Q8N9C0	ENSG00000179057	immunoglobulin superfamily member 22 [Source:HGNC Symbol;Acc:HGNC:26750]	TRUE	OID41323	NA	batch_2	NA	TRUE	TRUE
C3orf38	Q5JPI3	ENSG00000179021	chromosome 3 open reading frame 38 [Source:HGNC Symbol;Acc:HGNC:28384]	TRUE	OID40900	NA	batch_2	NA	TRUE	FALSE
SNX18	Q96RF0	ENSG00000178996	sorting nexin 18 [Source:HGNC Symbol;Acc:HGNC:19245]	TRUE	OID44269	NA	batch_2	NA	TRUE	TRUE
FBXO34	Q9NWN3	ENSG00000178974	F-box protein 34 [Source:HGNC Symbol;Acc:HGNC:20201]	TRUE	OID40235	NA	batch_2	NA	TRUE	FALSE
ERICH3	Q5RHP9	ENSG00000178965	glutamate rich 3 [Source:HGNC Symbol;Acc:HGNC:25346]	TRUE	OID41169	NA	batch_2	NA	TRUE	FALSE
GAK	O14976	ENSG00000178950	cyclin G associated kinase [Source:HGNC Symbol;Acc:HGNC:4113]	TRUE	OID40260	NA	batch_2	NA	TRUE	FALSE
EXOSC4	Q9NPD3	ENSG00000178896	exosome component 4 [Source:HGNC Symbol;Acc:HGNC:18189]	TRUE	OID41177	NA	batch_2	NA	TRUE	FALSE
RFLNA	Q6ZTI6	ENSG00000178882	refilin A [Source:HGNC Symbol;Acc:HGNC:27051]	TRUE	OID40558	NA	batch_2	NA	TRUE	TRUE
EFCAB13	Q8IY85	ENSG00000178852	EF-hand calcium binding domain 13 [Source:HGNC Symbol;Acc:HGNC:26864]	TRUE	OID40187	NA	batch_2	NA	TRUE	FALSE
OPLAH	O14841	ENSG00000178814	5-oxoprolinase, ATP-hydrolysing [Source:HGNC Symbol;Acc:HGNC:8149]	TRUE	OID44059	NA	batch_2	NA	TRUE	TRUE
MPI	P34949	ENSG00000178802	mannose phosphate isomerase [Source:HGNC Symbol;Acc:HGNC:7216]	TRUE	OID43984	NA	batch_2	NA	TRUE	FALSE
CD300LB	A8K4G0	ENSG00000178789	CD300 molecule like family member b [Source:HGNC Symbol;Acc:HGNC:30811]	TRUE	OID40969	NA	batch_2	NA	TRUE	FALSE
CPN2	P22792	ENSG00000178772	carboxypeptidase N subunit 2 [Source:HGNC Symbol;Acc:HGNC:2313]	TRUE	OID45339	NA	batch_2	NA	TRUE	TRUE
ZHX2	Q9Y6X8	ENSG00000178764	zinc fingers and homeoboxes 2 [Source:HGNC Symbol;Acc:HGNC:18513]	TRUE	OID44427	NA	batch_2	NA	TRUE	FALSE
GP5	P40197	ENSG00000178732	glycoprotein V platelet [Source:HGNC Symbol;Acc:HGNC:4443]	TRUE	OID44691	NA	batch_2	NA	TRUE	TRUE
THBD	P07204	ENSG00000178726	thrombomodulin [Source:HGNC Symbol;Acc:HGNC:11784]	TRUE	OID44977	OID20231	batch_1+2	QuantileSmoothing	TRUE	TRUE
PARP10	Q53GL7	ENSG00000178685	poly(ADP-ribose) polymerase family member 10 [Source:HGNC Symbol;Acc:HGNC:25895]	TRUE	OID41587	NA	batch_2	NA	TRUE	FALSE
ERN1	O75460	ENSG00000178607	endoplasmic reticulum to nucleus signaling 1 [Source:HGNC Symbol;Acc:HGNC:3449]	TRUE	OID43689	NA	batch_2	NA	TRUE	TRUE
PSAPL1	Q6NUJ1	ENSG00000178597	prosaposin like 1 [Source:HGNC Symbol;Acc:HGNC:33131]	TRUE	OID44131	NA	batch_2	NA	TRUE	TRUE
ERBB4	Q15303	ENSG00000178568	erb-b2 receptor tyrosine kinase 4 [Source:HGNC Symbol;Acc:HGNC:3432]	TRUE	OID44635	NA	batch_2	NA	TRUE	TRUE
CD28	P10747	ENSG00000178562	CD28 molecule [Source:HGNC Symbol;Acc:HGNC:1653]	TRUE	OID42239	NA	batch_2	NA	TRUE	TRUE
CA8	P35219	ENSG00000178538	carbonic anhydrase 8 [Source:HGNC Symbol;Acc:HGNC:1382]	TRUE	OID42208	NA	batch_2	NA	TRUE	FALSE
AMBN	Q9NP70	ENSG00000178522	ameloblastin [Source:HGNC Symbol;Acc:HGNC:452]	TRUE	OID42111	OID20437	batch_1+2	QuantileSmoothing	TRUE	TRUE
DTX3	Q8N9I9	ENSG00000178498	deltex E3 ubiquitin ligase 3 [Source:HGNC Symbol;Acc:HGNC:24457]	TRUE	OID43640	NA	batch_2	NA	TRUE	TRUE
CEP295NL	Q96MC4	ENSG00000178404	CEP295 N-terminal like [Source:HGNC Symbol;Acc:HGNC:44659]	TRUE	OID40991	NA	batch_2	NA	TRUE	FALSE
HTR1A	P08908	ENSG00000178394	5-hydroxytryptamine receptor 1A [Source:HGNC Symbol;Acc:HGNC:5286]	TRUE	OID42578	NA	batch_2	NA	TRUE	TRUE
SLITRK1	Q96PX8	ENSG00000178235	SLIT and NTRK like family member 1 [Source:HGNC Symbol;Acc:HGNC:20297]	TRUE	OID44255	NA	batch_2	NA	TRUE	TRUE
SH2D4B	Q5SQS7	ENSG00000178217	SH2 domain containing 4B [Source:HGNC Symbol;Acc:HGNC:31440]	TRUE	OID41790	NA	batch_2	NA	TRUE	TRUE
ZC3H12D	A2A288	ENSG00000178199	zinc finger CCCH-type containing 12D [Source:HGNC Symbol;Acc:HGNC:21175]	TRUE	OID42046	NA	batch_2	NA	TRUE	FALSE
LCORL	Q8N3X6	ENSG00000178177	ligand dependent nuclear receptor corepressor like [Source:HGNC Symbol;Acc:HGNC:30776]	TRUE	OID42689	NA	batch_2	NA	TRUE	FALSE
SPINK6	Q6UWN8	ENSG00000178172	serine peptidase inhibitor Kazal type 6 [Source:HGNC Symbol;Acc:HGNC:29486]	TRUE	OID44277	NA	batch_2	NA	TRUE	TRUE
DDX10	Q13206	ENSG00000178105	DEAD-box helicase 10 [Source:HGNC Symbol;Acc:HGNC:2735]	TRUE	OID41085	NA	batch_2	NA	TRUE	FALSE
PDE4DIP	Q5VU43	ENSG00000178104	phosphodiesterase 4D interacting protein [Source:HGNC Symbol;Acc:HGNC:15580]	TRUE	OID41602	NA	batch_2	NA	TRUE	FALSE
BOLA1	Q9Y3E2	ENSG00000178096	bolA family member 1 [Source:HGNC Symbol;Acc:HGNC:24263]	TRUE	OID42190	NA	batch_2	NA	TRUE	TRUE
STAP2	Q9UGK3	ENSG00000178078	signal transducing adaptor family member 2 [Source:HGNC Symbol;Acc:HGNC:30430]	TRUE	OID40629	NA	batch_2	NA	TRUE	FALSE
C2orf69	Q8N8R5	ENSG00000178074	chromosome 2 open reading frame 69 [Source:HGNC Symbol;Acc:HGNC:26799]	TRUE	OID42203	NA	batch_2	NA	TRUE	FALSE
MLF1	P58340	ENSG00000178053	myeloid leukemia factor 1 [Source:HGNC Symbol;Acc:HGNC:7125]	TRUE	OID40412	NA	batch_2	NA	TRUE	FALSE
DMAP1	Q9NPF5	ENSG00000178028	DNA methyltransferase 1 associated protein 1 [Source:HGNC Symbol;Acc:HGNC:18291]	TRUE	OID41104	NA	batch_2	NA	TRUE	FALSE
LCN15	Q6UWW0	ENSG00000177984	lipocalin 15 [Source:HGNC Symbol;Acc:HGNC:33777]	TRUE	OID43918	NA	batch_2	NA	TRUE	FALSE
MAMDC4	Q6UXC1	ENSG00000177943	MAM domain containing 4 [Source:HGNC Symbol;Acc:HGNC:24083]	TRUE	OID42729	NA	batch_2	NA	TRUE	TRUE
HNRNPA0	Q13151	ENSG00000177733	heterogeneous nuclear ribonucleoprotein A0 [Source:HGNC Symbol;Acc:HGNC:5030]	TRUE	OID42569	NA	batch_2	NA	TRUE	TRUE
DNAJC28	Q9NX36	ENSG00000177692	DnaJ heat shock protein family (Hsp40) member C28 [Source:HGNC Symbol;Acc:HGNC:1297]	TRUE	OID41117	NA	batch_2	NA	TRUE	FALSE
CRACR2B	Q8N4Y2	ENSG00000177685	calcium release activated channel regulator 2B [Source:HGNC Symbol;Acc:HGNC:28703]	TRUE	OID41052	NA	batch_2	NA	TRUE	FALSE
TEX44	Q53QW1	ENSG00000177673	testis expressed 44 [Source:HGNC Symbol;Acc:HGNC:28563]	TRUE	OID41930	NA	batch_2	NA	TRUE	TRUE
IL17RA	Q96F46	ENSG00000177663	interleukin 17 receptor A [Source:HGNC Symbol;Acc:HGNC:5985]	TRUE	OID45155	NA	batch_2	NA	TRUE	TRUE
ACAD9	Q9H845	ENSG00000177646	acyl-CoA dehydrogenase family member 9 [Source:HGNC Symbol;Acc:HGNC:21497]	TRUE	OID40004	NA	batch_2	NA	TRUE	FALSE
GBA1	P04062	ENSG00000177628	glucosylceramidase beta 1 [Source:HGNC Symbol;Acc:HGNC:4177]	TRUE	OID43742	NA	batch_2	NA	TRUE	TRUE
JUN	P05412	ENSG00000177606	Jun proto-oncogene, AP-1 transcription factor subunit [Source:HGNC Symbol;Acc:HGNC:6204]	TRUE	OID42648	OID20424	batch_1+2	MedianCentering	TRUE	FALSE
CD163	Q86VB7	ENSG00000177575	CD163 molecule [Source:HGNC Symbol;Acc:HGNC:1631]	TRUE	OID45328	NA	batch_2	NA	TRUE	TRUE
SAMD12	Q8N8I0	ENSG00000177570	sterile alpha motif domain containing 12 [Source:HGNC Symbol;Acc:HGNC:31750]	TRUE	OID41764	NA	batch_2	NA	TRUE	FALSE
ATOX1	O00244	ENSG00000177556	antioxidant 1 copper chaperone [Source:HGNC Symbol;Acc:HGNC:798]	TRUE	OID44471	NA	batch_2	NA	TRUE	TRUE
RABEP2	Q9H5N1	ENSG00000177548	rabaptin, RAB GTPase binding effector protein 2 [Source:HGNC Symbol;Acc:HGNC:24817]	TRUE	OID44163	NA	batch_2	NA	TRUE	TRUE
NR2C2	P49116	ENSG00000177463	nuclear receptor subfamily 2 group C member 2 [Source:HGNC Symbol;Acc:HGNC:7972]	TRUE	OID41557	NA	batch_2	NA	TRUE	FALSE
TGIF1	Q15583	ENSG00000177426	TGFB induced factor homeobox 1 [Source:HGNC Symbol;Acc:HGNC:11776]	TRUE	OID40657	NA	batch_2	NA	TRUE	FALSE
UBE2U	Q5VVX9	ENSG00000177414	ubiquitin conjugating enzyme E2 U [Source:HGNC Symbol;Acc:HGNC:28559]	TRUE	OID40692	NA	batch_2	NA	TRUE	TRUE
SAMD9L	Q8IVG5	ENSG00000177409	sterile alpha motif domain containing 9 like [Source:HGNC Symbol;Acc:HGNC:1349]	TRUE	OID44205	OID20536	batch_1+2	MedianCentering	TRUE	TRUE
LINC00469	Q8N7U9	ENSG00000177338	long intergenic non-protein coding RNA 469 [Source:HGNC Symbol;Acc:HGNC:26863]	TRUE	OID40367	NA	batch_2	NA	TRUE	FALSE
BEND2	Q8NDZ0	ENSG00000177324	BEN domain containing 2 [Source:HGNC Symbol;Acc:HGNC:28509]	TRUE	OID40858	NA	batch_2	NA	TRUE	FALSE
CASKIN2	Q8WXE0	ENSG00000177303	CASK interacting protein 2 [Source:HGNC Symbol;Acc:HGNC:18200]	TRUE	OID40924	NA	batch_2	NA	TRUE	FALSE
FZD8	Q9H461	ENSG00000177283	frizzled class receptor 8 [Source:HGNC Symbol;Acc:HGNC:4046]	TRUE	OID42486	NA	batch_2	NA	TRUE	FALSE
KCNA3	P22001	ENSG00000177272	potassium voltage-gated channel subfamily A member 3 [Source:HGNC Symbol;Acc:HGNC:6221]	TRUE	OID41358	NA	batch_2	NA	TRUE	FALSE
TALDO1	P37837	ENSG00000177156	transaldolase 1 [Source:HGNC Symbol;Acc:HGNC:11559]	TRUE	OID45273	NA	batch_2	NA	TRUE	TRUE
CETN1	Q12798	ENSG00000177143	centrin 1 [Source:HGNC Symbol;Acc:HGNC:1866]	TRUE	OID40107	NA	batch_2	NA	TRUE	FALSE
EPS8L2	Q9H6S3	ENSG00000177106	EPS8 signaling adaptor L2 [Source:HGNC Symbol;Acc:HGNC:21296]	TRUE	OID43686	NA	batch_2	NA	TRUE	TRUE
SCN4B	Q8IWT1	ENSG00000177098	sodium voltage-gated channel beta subunit 4 [Source:HGNC Symbol;Acc:HGNC:10592]	TRUE	OID44215	NA	batch_2	NA	TRUE	TRUE
FBXO46	Q6PJ61	ENSG00000177051	F-box protein 46 [Source:HGNC Symbol;Acc:HGNC:25069]	TRUE	OID41205	NA	batch_2	NA	TRUE	FALSE
IFNW1	P05000	ENSG00000177047	interferon omega 1 [Source:HGNC Symbol;Acc:HGNC:5448]	TRUE	OID42588	NA	batch_2	NA	TRUE	FALSE
TRIM60	Q495X7	ENSG00000176979	tripartite motif containing 60 [Source:HGNC Symbol;Acc:HGNC:21162]	TRUE	OID41953	NA	batch_2	NA	TRUE	TRUE
DPP7	Q9UHL4	ENSG00000176978	dipeptidyl peptidase 7 [Source:HGNC Symbol;Acc:HGNC:14892]	TRUE	OID44612	OID20142	batch_1+2	QuantileSmoothing	TRUE	TRUE
SHMT1	P34896	ENSG00000176974	serine hydroxymethyltransferase 1 [Source:HGNC Symbol;Acc:HGNC:10850]	TRUE	OID44930	OID20714	batch_1+2	MedianCentering	TRUE	TRUE
THAP4	Q8WY91	ENSG00000176946	THAP domain containing 4 [Source:HGNC Symbol;Acc:HGNC:23187]	TRUE	OID41935	NA	batch_2	NA	TRUE	FALSE
MUC20	Q8N307	ENSG00000176945	mucin 20, cell surface associated [Source:HGNC Symbol;Acc:HGNC:23282]	TRUE	OID42787	NA	batch_2	NA	TRUE	TRUE
GCNT4	Q9P109	ENSG00000176928	glucosaminyl (N-acetyl) transferase 4 [Source:HGNC Symbol;Acc:HGNC:17973]	TRUE	OID41242	NA	batch_2	NA	TRUE	FALSE
PNMA1	Q8ND90	ENSG00000176903	PNMA family member 1 [Source:HGNC Symbol;Acc:HGNC:9158]	TRUE	OID42922	NA	batch_2	NA	TRUE	FALSE
TYMS	P04818	ENSG00000176890	thymidylate synthetase [Source:HGNC Symbol;Acc:HGNC:12441]	TRUE	OID43259	NA	batch_2	NA	TRUE	FALSE
FAM91A1	Q658Y4	ENSG00000176853	family with sequence similarity 91 member A1 [Source:HGNC Symbol;Acc:HGNC:26306]	TRUE	OID41198	NA	batch_2	NA	TRUE	FALSE
VSIG10	Q8N0Z9	ENSG00000176834	V-set and immunoglobulin domain containing 10 [Source:HGNC Symbol;Acc:HGNC:26078]	TRUE	OID44398	NA	batch_2	NA	TRUE	TRUE
DEFB103A_DEFB103B	P81534	ENSG00000176797, ENSG00000177243	defensin beta 103A [Source:HGNC Symbol;Acc:HGNC:15967], defensin beta 103B [Source:HGNC Symbol;Acc:HGNC:31702]	TRUE	OID43602	NA	batch_2	NA	TRUE	FALSE
DEFB104A_DEFB104B	Q8WTQ1	ENSG00000176782, ENSG00000177023	defensin beta 104A [Source:HGNC Symbol;Acc:HGNC:18115], defensin beta 104B [Source:HGNC Symbol;Acc:HGNC:26165]	TRUE	OID42365	NA	batch_2	NA	TRUE	FALSE
MAGEB18	Q96M61	ENSG00000176774	MAGE family member B18 [Source:HGNC Symbol;Acc:HGNC:28515]	TRUE	OID41444	NA	batch_2	NA	TRUE	TRUE
NCKAP5	O14513	ENSG00000176771	NCK associated protein 5 [Source:HGNC Symbol;Acc:HGNC:29847]	TRUE	OID40447	NA	batch_2	NA	TRUE	FALSE
CCDC121	Q6ZUS5	ENSG00000176714	coiled-coil domain containing 121 [Source:HGNC Symbol;Acc:HGNC:25833]	TRUE	OID40090	NA	batch_2	NA	TRUE	FALSE
BDNF	P23560	ENSG00000176697	brain derived neurotrophic factor [Source:HGNC Symbol;Acc:HGNC:1033]	TRUE	OID45040	NA	batch_2	NA	TRUE	TRUE
FOXL1	Q12952	ENSG00000176678	forkhead box L1 [Source:HGNC Symbol;Acc:HGNC:3817]	TRUE	OID40249	NA	batch_2	NA	TRUE	FALSE
MEX3C	Q5U5Q3	ENSG00000176624	mex-3 RNA binding family member C [Source:HGNC Symbol;Acc:HGNC:28040]	TRUE	OID42754	NA	batch_2	NA	TRUE	FALSE
LMNB2	Q03252	ENSG00000176619	lamin B2 [Source:HGNC Symbol;Acc:HGNC:6638]	TRUE	OID43926	NA	batch_2	NA	TRUE	TRUE
MAP3K19	Q56UN5	ENSG00000176601	mitogen-activated protein kinase kinase kinase 19 [Source:HGNC Symbol;Acc:HGNC:26249]	TRUE	OID42735	NA	batch_2	NA	TRUE	FALSE
CNBD1	Q8NA66	ENSG00000176571	cyclic nucleotide binding domain containing 1 [Source:HGNC Symbol;Acc:HGNC:26663]	TRUE	OID41035	NA	batch_2	NA	TRUE	TRUE
PRR15	Q8IV56	ENSG00000176532	proline rich 15 [Source:HGNC Symbol;Acc:HGNC:22310]	TRUE	OID42949	NA	batch_2	NA	TRUE	FALSE
PHLDB3	Q6NSJ2	ENSG00000176531	pleckstrin homology like domain family B member 3 [Source:HGNC Symbol;Acc:HGNC:30499]	TRUE	OID40502	NA	batch_2	NA	TRUE	FALSE
PLAAT3	P53816	ENSG00000176485	phospholipase A and acyltransferase 3 [Source:HGNC Symbol;Acc:HGNC:17825]	TRUE	OID40507	NA	batch_2	NA	TRUE	FALSE
SGF29	Q96ES7	ENSG00000176476	SAGA complex associated factor 29 [Source:HGNC Symbol;Acc:HGNC:25156]	TRUE	OID43067	NA	batch_2	NA	TRUE	TRUE
WDR25	Q64LD2	ENSG00000176473	WD repeat domain 25 [Source:HGNC Symbol;Acc:HGNC:21064]	TRUE	OID40710	NA	batch_2	NA	TRUE	FALSE
SYNE3	Q6ZMZ3	ENSG00000176438	spectrin repeat containing nuclear envelope family member 3 [Source:HGNC Symbol;Acc:HGNC:19861]	TRUE	OID41900	NA	batch_2	NA	TRUE	FALSE
CLEC14A	Q86T13	ENSG00000176435	C-type lectin domain containing 14A [Source:HGNC Symbol;Acc:HGNC:19832]	TRUE	OID45075	NA	batch_2	NA	TRUE	TRUE
DNAJC30	Q96LL9	ENSG00000176410	DnaJ heat shock protein family (Hsp40) member C30 [Source:HGNC Symbol;Acc:HGNC:16410]	TRUE	OID42382	NA	batch_2	NA	TRUE	TRUE
CDC26	Q8NHZ8	ENSG00000176386	cell division cycle 26 [Source:HGNC Symbol;Acc:HGNC:17839]	TRUE	OID43504	NA	batch_2	NA	TRUE	FALSE
PRR18	Q8N4B5	ENSG00000176381	proline rich 18 [Source:HGNC Symbol;Acc:HGNC:28574]	TRUE	OID40527	NA	batch_2	NA	TRUE	TRUE
ACBD7	Q8N6N7	ENSG00000176244	acyl-CoA binding domain containing 7 [Source:HGNC Symbol;Acc:HGNC:17715]	TRUE	OID40760	NA	batch_2	NA	TRUE	FALSE
LRRTM4	Q86VH4	ENSG00000176204	leucine rich repeat transmembrane neuronal 4 [Source:HGNC Symbol;Acc:HGNC:19411]	TRUE	OID41430	NA	batch_2	NA	TRUE	FALSE
ENTHD1	Q8IYW4	ENSG00000176177	ENTH domain containing 1 [Source:HGNC Symbol;Acc:HGNC:26352]	TRUE	OID41160	NA	batch_2	NA	TRUE	FALSE
FOXG1	P55316	ENSG00000176165	forkhead box G1 [Source:HGNC Symbol;Acc:HGNC:3811]	TRUE	OID40248	NA	batch_2	NA	TRUE	FALSE
CHMP6	Q96FZ7	ENSG00000176108	charged multivesicular body protein 6 [Source:HGNC Symbol;Acc:HGNC:25675]	TRUE	OID44538	NA	batch_2	NA	TRUE	TRUE
YES1	P07947	ENSG00000176105	YES proto-oncogene 1, Src family tyrosine kinase [Source:HGNC Symbol;Acc:HGNC:12841]	TRUE	OID44419	NA	batch_2	NA	TRUE	FALSE
SSNA1	O43805	ENSG00000176101	SS nuclear autoantigen 1 [Source:HGNC Symbol;Acc:HGNC:11321]	TRUE	OID44284	NA	batch_2	NA	TRUE	FALSE
IP6K1	Q92551	ENSG00000176095	inositol hexakisphosphate kinase 1 [Source:HGNC Symbol;Acc:HGNC:18360]	TRUE	OID41334	NA	batch_2	NA	TRUE	FALSE
TPRN	Q4KMQ1	ENSG00000176058	taperin [Source:HGNC Symbol;Acc:HGNC:26894]	TRUE	OID43228	NA	batch_2	NA	TRUE	FALSE
JAKMIP2	Q96AA8	ENSG00000176049	janus kinase and microtubule interacting protein 2 [Source:HGNC Symbol;Acc:HGNC:29067]	TRUE	OID41351	NA	batch_2	NA	TRUE	FALSE
NUPR1	O60356	ENSG00000176046	nuclear protein 1, transcriptional regulator [Source:HGNC Symbol;Acc:HGNC:29990]	TRUE	OID41568	NA	batch_2	NA	TRUE	FALSE
LYSMD3	Q7Z3D4	ENSG00000176018	LysM domain containing 3 [Source:HGNC Symbol;Acc:HGNC:26969]	TRUE	OID42721	NA	batch_2	NA	TRUE	TRUE
PLEKHD1	A6NEE1	ENSG00000175985	pleckstrin homology and coiled-coil domain containing D1 [Source:HGNC Symbol;Acc:HGNC:20148]	TRUE	OID41625	NA	batch_2	NA	TRUE	FALSE
DENND2C	Q68D51	ENSG00000175984	DENN domain containing 2C [Source:HGNC Symbol;Acc:HGNC:24748]	TRUE	OID41094	NA	batch_2	NA	TRUE	TRUE
LRRN1	Q6UXK5	ENSG00000175928	leucine rich repeat neuronal 1 [Source:HGNC Symbol;Acc:HGNC:20980]	TRUE	OID42708	OID20438	batch_1+2	MedianCentering	TRUE	TRUE
DOK7	Q18PE1	ENSG00000175920	docking protein 7 [Source:HGNC Symbol;Acc:HGNC:26594]	TRUE	OID40172	NA	batch_2	NA	TRUE	FALSE
HOXD8	P13378	ENSG00000175879	homeobox D8 [Source:HGNC Symbol;Acc:HGNC:5139]	TRUE	OID41301	NA	batch_2	NA	TRUE	TRUE
CREG2	Q8IUH2	ENSG00000175874	cellular repressor of E1A stimulated genes 2 [Source:HGNC Symbol;Acc:HGNC:14272]	TRUE	OID40130	NA	batch_2	NA	TRUE	FALSE
CALCB	P10092	ENSG00000175868	calcitonin related polypeptide beta [Source:HGNC Symbol;Acc:HGNC:1438]	TRUE	OID43444	NA	batch_2	NA	TRUE	TRUE
BAIAP2	Q9UQB8	ENSG00000175866	BAR/IMD domain containing adaptor protein 2 [Source:HGNC Symbol;Acc:HGNC:947]	TRUE	OID42170	NA	batch_2	NA	TRUE	TRUE
ETV4	P43268	ENSG00000175832	ETS variant transcription factor 4 [Source:HGNC Symbol;Acc:HGNC:3493]	TRUE	OID40207	NA	batch_2	NA	TRUE	TRUE
CCDC168	Q8NDH2	ENSG00000175820	coiled-coil domain containing 168 [Source:HGNC Symbol;Acc:HGNC:26851]	TRUE	OID40943	NA	batch_2	NA	TRUE	FALSE
CBLL2	Q8N7E2	ENSG00000175809	Cbl proto-oncogene like 2 [Source:HGNC Symbol;Acc:HGNC:26371]	TRUE	OID40927	NA	batch_2	NA	TRUE	FALSE
MSRA	Q9UJ68	ENSG00000175806	methionine sulfoxide reductase A [Source:HGNC Symbol;Acc:HGNC:7377]	TRUE	OID44794	NA	batch_2	NA	TRUE	TRUE
RUVBL1	Q9Y265	ENSG00000175792	RuvB like AAA ATPase 1 [Source:HGNC Symbol;Acc:HGNC:10474]	TRUE	OID43038	NA	batch_2	NA	TRUE	FALSE
MLXIP	Q9HAP2	ENSG00000175727	MLX interacting protein [Source:HGNC Symbol;Acc:HGNC:17055]	TRUE	OID40413	NA	batch_2	NA	TRUE	TRUE
KDF1	Q8NAX2	ENSG00000175707	keratinocyte differentiation factor 1 [Source:HGNC Symbol;Acc:HGNC:26624]	TRUE	OID41366	NA	batch_2	NA	TRUE	FALSE
CCDC197	Q8NCU1	ENSG00000175699	coiled-coil domain containing 197 [Source:HGNC Symbol;Acc:HGNC:19860]	TRUE	OID40946	NA	batch_2	NA	TRUE	FALSE
TOM1L2	Q6ZVM7	ENSG00000175662	target of myb1 like 2 membrane trafficking protein [Source:HGNC Symbol;Acc:HGNC:11984]	TRUE	OID44351	NA	batch_2	NA	TRUE	FALSE
ERCC4	Q92889	ENSG00000175595	ERCC excision repair 4, endonuclease catalytic subunit [Source:HGNC Symbol;Acc:HGNC:3436]	TRUE	OID41167	NA	batch_2	NA	TRUE	FALSE
CABP4	P57796	ENSG00000175544	calcium binding protein 4 [Source:HGNC Symbol;Acc:HGNC:1386]	TRUE	OID40082	NA	batch_2	NA	TRUE	TRUE
PNLIP	P16233	ENSG00000175535	pancreatic lipase [Source:HGNC Symbol;Acc:HGNC:9155]	TRUE	OID45398	NA	batch_2	NA	TRUE	TRUE
UBQLN3	Q9H347	ENSG00000175520	ubiquilin 3 [Source:HGNC Symbol;Acc:HGNC:12510]	TRUE	OID43262	NA	batch_2	NA	TRUE	FALSE
UBQLNL	Q8IYU4	ENSG00000175518	ubiquilin like [Source:HGNC Symbol;Acc:HGNC:28294]	TRUE	OID41989	NA	batch_2	NA	TRUE	FALSE
TSGA10IP	Q3SY00	ENSG00000175513	testis specific 10 interacting protein [Source:HGNC Symbol;Acc:HGNC:26555]	TRUE	OID40680	NA	batch_2	NA	TRUE	FALSE
DPP10	Q8N608	ENSG00000175497	dipeptidyl peptidase like 10 [Source:HGNC Symbol;Acc:HGNC:20823]	TRUE	OID43632	OID20527	batch_1+2	QuantileSmoothing	TRUE	TRUE
LRRC25	Q8N386	ENSG00000175489	leucine rich repeat containing 25 [Source:HGNC Symbol;Acc:HGNC:29806]	TRUE	OID43936	NA	batch_2	NA	TRUE	FALSE
POLD4	Q9HCU8	ENSG00000175482	DNA polymerase delta 4, accessory subunit [Source:HGNC Symbol;Acc:HGNC:14106]	TRUE	OID41641	NA	batch_2	NA	TRUE	FALSE
SART1	O43290	ENSG00000175467	spliceosome associated factor 1, recruiter of U4/U6.U5 tri-snRNP [Source:HGNC Symbol;Acc:HGNC:10538]	TRUE	OID43046	NA	batch_2	NA	TRUE	FALSE
CCDC14	Q49A88	ENSG00000175455	coiled-coil domain containing 14 [Source:HGNC Symbol;Acc:HGNC:25766]	TRUE	OID40938	NA	batch_2	NA	TRUE	FALSE
SMAD2	Q15796	ENSG00000175387	SMAD family member 2 [Source:HGNC Symbol;Acc:HGNC:6768]	TRUE	OID43102	NA	batch_2	NA	TRUE	FALSE
PTPN2	P17706	ENSG00000175354	protein tyrosine phosphatase non-receptor type 2 [Source:HGNC Symbol;Acc:HGNC:9650]	TRUE	OID41677	NA	batch_2	NA	TRUE	FALSE
NRIP3	Q9NQ35	ENSG00000175352	nuclear receptor interacting protein 3 [Source:HGNC Symbol;Acc:HGNC:1167]	TRUE	OID40469	NA	batch_2	NA	TRUE	FALSE
APOF	Q13790	ENSG00000175336	apolipoprotein F [Source:HGNC Symbol;Acc:HGNC:615]	TRUE	OID45311	NA	batch_2	NA	TRUE	TRUE
LSM1	O15116	ENSG00000175324	LSM1 homolog, mRNA degradation associated [Source:HGNC Symbol;Acc:HGNC:20472]	TRUE	OID42711	NA	batch_2	NA	TRUE	FALSE
CST6	Q15828	ENSG00000175315	cystatin E/M [Source:HGNC Symbol;Acc:HGNC:2478]	TRUE	OID45093	OID20293	batch_1+2	MedianCentering	TRUE	TRUE
PHYKPL	Q8IUZ5	ENSG00000175309	5-phosphohydroxy-L-lysine phospho-lyase [Source:HGNC Symbol;Acc:HGNC:28249]	TRUE	OID44846	NA	batch_2	NA	TRUE	TRUE
CENPS	Q8N2Z9	ENSG00000175279	centromere protein S [Source:HGNC Symbol;Acc:HGNC:23163]	TRUE	OID40103	NA	batch_2	NA	TRUE	FALSE
CHST1	O43916	ENSG00000175264	carbohydrate sulfotransferase 1 [Source:HGNC Symbol;Acc:HGNC:1969]	TRUE	OID40116	NA	batch_2	NA	TRUE	FALSE
ATG13	O75143	ENSG00000175224	autophagy related 13 [Source:HGNC Symbol;Acc:HGNC:29091]	TRUE	OID40838	NA	batch_2	NA	TRUE	TRUE
ARHGAP1	Q07960	ENSG00000175220	Rho GTPase activating protein 1 [Source:HGNC Symbol;Acc:HGNC:673]	TRUE	OID42133	NA	batch_2	NA	TRUE	FALSE
CKAP5	Q14008	ENSG00000175216	cytoskeleton associated protein 5 [Source:HGNC Symbol;Acc:HGNC:28959]	TRUE	OID44542	NA	batch_2	NA	TRUE	TRUE
DCTN2	Q13561	ENSG00000175203	dynactin subunit 2 [Source:HGNC Symbol;Acc:HGNC:2712]	TRUE	OID43596	NA	batch_2	NA	TRUE	TRUE
DDIT3	P35638	ENSG00000175197	DNA damage inducible transcript 3 [Source:HGNC Symbol;Acc:HGNC:2726]	TRUE	OID40153	NA	batch_2	NA	TRUE	FALSE
INHBC	P55103	ENSG00000175189	inhibin subunit beta C [Source:HGNC Symbol;Acc:HGNC:6068]	TRUE	OID45162	NA	batch_2	NA	TRUE	TRUE
SH3BP5L	Q7L8J4	ENSG00000175137	SH3 binding domain protein 5 like [Source:HGNC Symbol;Acc:HGNC:29360]	TRUE	OID43071	NA	batch_2	NA	TRUE	TRUE
DSG4	Q86SJ6	ENSG00000175065	desmoglein 4 [Source:HGNC Symbol;Acc:HGNC:21307]	TRUE	OID43638	NA	batch_2	NA	TRUE	TRUE
CHST2	Q9Y4C5	ENSG00000175040	carbohydrate sulfotransferase 2 [Source:HGNC Symbol;Acc:HGNC:1970]	TRUE	OID41017	NA	batch_2	NA	TRUE	TRUE
CA5A	P35218	ENSG00000174990	carbonic anhydrase 5A [Source:HGNC Symbol;Acc:HGNC:1377]	TRUE	OID42206	OID20075	batch_1+2	QuantileSmoothing	TRUE	FALSE
DHX36	Q9H2U1	ENSG00000174953	DEAH-box helicase 36 [Source:HGNC Symbol;Acc:HGNC:14410]	TRUE	OID41097	NA	batch_2	NA	TRUE	FALSE
FUT1	P19526	ENSG00000174951	fucosyltransferase 1 (H blood group) [Source:HGNC Symbol;Acc:HGNC:4012]	TRUE	OID42482	NA	batch_2	NA	TRUE	FALSE
CD164L2	Q6UWJ8	ENSG00000174950	CD164 molecule like 2 [Source:HGNC Symbol;Acc:HGNC:32043]	TRUE	OID42237	NA	batch_2	NA	TRUE	FALSE
SEZ6L2	Q6UXD5	ENSG00000174938	seizure related 6 homolog like 2 [Source:HGNC Symbol;Acc:HGNC:30844]	TRUE	OID44236	NA	batch_2	NA	TRUE	TRUE
METTL15P1	P0C7V9	ENSG00000174912	methyltransferase like 15 pseudogene 1 [Source:HGNC Symbol;Acc:HGNC:31926]	TRUE	OID40406	NA	batch_2	NA	TRUE	FALSE
RSRC1	Q96IZ7	ENSG00000174891	arginine and serine rich coiled-coil 1 [Source:HGNC Symbol;Acc:HGNC:24152]	TRUE	OID41751	NA	batch_2	NA	TRUE	TRUE
ADGRE1	Q14246	ENSG00000174837	adhesion G protein-coupled receptor E1 [Source:HGNC Symbol;Acc:HGNC:3336]	TRUE	OID43336	NA	batch_2	NA	TRUE	FALSE
PDZK1	Q5T2W1	ENSG00000174827	PDZ domain containing 1 [Source:HGNC Symbol;Acc:HGNC:8821]	TRUE	OID44085	NA	batch_2	NA	TRUE	TRUE
BTC	P35070	ENSG00000174808	betacellulin [Source:HGNC Symbol;Acc:HGNC:1121]	TRUE	OID42197	NA	batch_2	NA	TRUE	FALSE
CD248	Q9HCU0	ENSG00000174807	CD248 molecule [Source:HGNC Symbol;Acc:HGNC:18219]	TRUE	OID45059	NA	batch_2	NA	TRUE	TRUE
CEP135	Q66GS9	ENSG00000174799	centrosomal protein 135 [Source:HGNC Symbol;Acc:HGNC:29086]	TRUE	OID43516	NA	batch_2	NA	TRUE	FALSE
RIN1	Q13671	ENSG00000174791	Ras and Rab interactor 1 [Source:HGNC Symbol;Acc:HGNC:18749]	TRUE	OID40566	NA	batch_2	NA	TRUE	FALSE
HRAS	P01112	ENSG00000174775	HRas proto-oncogene, GTPase [Source:HGNC Symbol;Acc:HGNC:5173]	TRUE	OID42573	NA	batch_2	NA	TRUE	FALSE
NR1D2	Q14995	ENSG00000174738	nuclear receptor subfamily 1 group D member 2 [Source:HGNC Symbol;Acc:HGNC:7963]	TRUE	OID41556	NA	batch_2	NA	TRUE	FALSE
FGFBP3	Q8TAT2	ENSG00000174721	fibroblast growth factor binding protein 3 [Source:HGNC Symbol;Acc:HGNC:23428]	TRUE	OID43713	NA	batch_2	NA	TRUE	TRUE
SH3PXD2B	A1X283	ENSG00000174705	SH3 and PX domains 2B [Source:HGNC Symbol;Acc:HGNC:29242]	TRUE	OID44242	NA	batch_2	NA	TRUE	TRUE
LEP	P41159	ENSG00000174697	leptin [Source:HGNC Symbol;Acc:HGNC:6553]	TRUE	OID44746	OID20187	batch_1+2	MedianCentering	TRUE	TRUE
B4GAT1	O43505	ENSG00000174684	beta-1,4-glucuronyltransferase 1 [Source:HGNC Symbol;Acc:HGNC:15685]	TRUE	OID45038	NA	batch_2	NA	TRUE	TRUE
BRSK2	Q8IWQ3	ENSG00000174672	BR serine/threonine kinase 2 [Source:HGNC Symbol;Acc:HGNC:11405]	TRUE	OID43426	NA	batch_2	NA	TRUE	FALSE
MSL2	Q9HCI7	ENSG00000174579	MSL complex subunit 2 [Source:HGNC Symbol;Acc:HGNC:25544]	TRUE	OID41491	NA	batch_2	NA	TRUE	TRUE
IL20RB	Q6UXL0	ENSG00000174564	interleukin 20 receptor subunit beta [Source:HGNC Symbol;Acc:HGNC:6004]	TRUE	OID42613	NA	batch_2	NA	TRUE	FALSE
KLK15	Q9H2R5	ENSG00000174562	kallikrein related peptidase 15 [Source:HGNC Symbol;Acc:HGNC:20453]	TRUE	OID43898	NA	batch_2	NA	TRUE	TRUE
GCSAM	Q8N6F7	ENSG00000174500	germinal center associated signaling and motility [Source:HGNC Symbol;Acc:HGNC:20253]	TRUE	OID41243	NA	batch_2	NA	TRUE	FALSE
IGDCC3	Q8IVU1	ENSG00000174498	immunoglobulin superfamily DCC subclass member 3 [Source:HGNC Symbol;Acc:HGNC:9700]	TRUE	OID42590	NA	batch_2	NA	TRUE	FALSE
CNTNAP2	Q9UHC6	ENSG00000174469	contactin associated protein 2 [Source:HGNC Symbol;Acc:HGNC:13830]	TRUE	OID43549	OID20556	batch_1+2	MedianCentering	TRUE	TRUE
VWC2L	B2RUY7	ENSG00000174453	von Willebrand factor C domain containing 2 like [Source:HGNC Symbol;Acc:HGNC:37203]	TRUE	OID44404	NA	batch_2	NA	TRUE	TRUE
ZWILCH	Q9H900	ENSG00000174442	zwilch kinetochore protein [Source:HGNC Symbol;Acc:HGNC:25468]	TRUE	OID40750	NA	batch_2	NA	TRUE	FALSE
ABRA	Q8N0Z2	ENSG00000174429	actin binding Rho activating protein [Source:HGNC Symbol;Acc:HGNC:30655]	TRUE	OID40759	NA	batch_2	NA	TRUE	FALSE
PHLDA3	Q9Y5J5	ENSG00000174307	pleckstrin homology like domain family A member 3 [Source:HGNC Symbol;Acc:HGNC:8934]	TRUE	OID41615	NA	batch_2	NA	TRUE	FALSE
EVX2	Q03828	ENSG00000174279	even-skipped homeobox 2 [Source:HGNC Symbol;Acc:HGNC:3507]	TRUE	OID40210	NA	batch_2	NA	TRUE	FALSE
DDX23	Q9BUQ8	ENSG00000174243	DEAD-box helicase 23 [Source:HGNC Symbol;Acc:HGNC:17347]	TRUE	OID42358	NA	batch_2	NA	TRUE	TRUE
MGA	Q8IWI9	ENSG00000174197	MAX dimerization protein MGA [Source:HGNC Symbol;Acc:HGNC:14010]	TRUE	OID41472	NA	batch_2	NA	TRUE	FALSE
SELP	P16109	ENSG00000174175	selectin P [Source:HGNC Symbol;Acc:HGNC:10721]	TRUE	OID45410	OID20379	batch_1+2	QuantileSmoothing	TRUE	TRUE
TRMT10C	Q7L0Y3	ENSG00000174173	tRNA methyltransferase 10C, mitochondrial RNase P subunit [Source:HGNC Symbol;Acc:HGNC:26022]	TRUE	OID45000	NA	batch_2	NA	TRUE	TRUE
GSTA3	Q16772	ENSG00000174156	glutathione S-transferase alpha 3 [Source:HGNC Symbol;Acc:HGNC:4628]	TRUE	OID42540	NA	batch_2	NA	TRUE	FALSE
RGMB	Q6NW40	ENSG00000174136	repulsive guidance molecule BMP co-receptor b [Source:HGNC Symbol;Acc:HGNC:26896]	TRUE	OID44895	NA	batch_2	NA	TRUE	TRUE
TLR1	Q15399	ENSG00000174125	toll like receptor 1 [Source:HGNC Symbol;Acc:HGNC:11847]	TRUE	OID44326	NA	batch_2	NA	TRUE	TRUE
CTSF	Q9UBX1	ENSG00000174080	cathepsin F [Source:HGNC Symbol;Acc:HGNC:2531]	TRUE	OID44580	NA	batch_2	NA	TRUE	TRUE
CD34	P28906	ENSG00000174059	CD34 molecule [Source:HGNC Symbol;Acc:HGNC:1662]	TRUE	OID44513	NA	batch_2	NA	TRUE	TRUE
CBY2	Q8NA61	ENSG00000174015	chibby family member 2 [Source:HGNC Symbol;Acc:HGNC:30720]	TRUE	OID40089	NA	batch_2	NA	TRUE	FALSE
CCS	O14618	ENSG00000173992	copper chaperone for superoxide dismutase [Source:HGNC Symbol;Acc:HGNC:1613]	TRUE	OID43478	NA	batch_2	NA	TRUE	FALSE
UBXN2A	P68543	ENSG00000173960	UBX domain protein 2A [Source:HGNC Symbol;Acc:HGNC:27265]	TRUE	OID40697	NA	batch_2	NA	TRUE	FALSE
C1QTNF1	Q9BXJ1	ENSG00000173918	C1q and TNF related 1 [Source:HGNC Symbol;Acc:HGNC:14324]	TRUE	OID45318	OID20367	batch_1+2	QuantileSmoothing	TRUE	TRUE
SPTBN2	O15020	ENSG00000173898	spectrin beta, non-erythrocytic 2 [Source:HGNC Symbol;Acc:HGNC:11276]	TRUE	OID43129	NA	batch_2	NA	TRUE	FALSE
PHOSPHO1	Q8TCT1	ENSG00000173868	phosphoethanolamine/phosphocholine phosphatase 1 [Source:HGNC Symbol;Acc:HGNC:16815]	TRUE	OID44094	NA	batch_2	NA	TRUE	TRUE
NET1	Q7Z628	ENSG00000173848	neuroepithelial cell transforming 1 [Source:HGNC Symbol;Acc:HGNC:14592]	TRUE	OID40455	NA	batch_2	NA	TRUE	FALSE
RNF213	Q63HN8	ENSG00000173821	ring finger protein 213 [Source:HGNC Symbol;Acc:HGNC:14539]	TRUE	OID41734	NA	batch_2	NA	TRUE	FALSE
CNP	P09543	ENSG00000173786	2',3'-cyclic nucleotide 3' phosphodiesterase [Source:HGNC Symbol;Acc:HGNC:2158]	TRUE	OID43546	NA	batch_2	NA	TRUE	TRUE
CD7	P09564	ENSG00000173762	CD7 molecule [Source:HGNC Symbol;Acc:HGNC:1695]	TRUE	OID43497	NA	batch_2	NA	TRUE	FALSE
STAT5B	P51692	ENSG00000173757	signal transducer and activator of transcription 5B [Source:HGNC Symbol;Acc:HGNC:11367]	TRUE	OID44289	NA	batch_2	NA	TRUE	TRUE
TOMM20	Q15388	ENSG00000173726	translocase of outer mitochondrial membrane 20 [Source:HGNC Symbol;Acc:HGNC:20947]	TRUE	OID44993	NA	batch_2	NA	TRUE	FALSE
TOP6BL	Q8N6T0	ENSG00000173715	TOP6B like initiator of meiotic double strand breaks [Source:HGNC Symbol;Acc:HGNC:26197]	TRUE	OID40671	NA	batch_2	NA	TRUE	FALSE
WFIKKN2	Q8TEU8	ENSG00000173714	WAP, follistatin/kazal, immunoglobulin, kunitz and netrin domain containing 2 [Source:HGNC Symbol;Acc:HGNC:30916]	TRUE	OID45019	OID20785	batch_1+2	MedianCentering	TRUE	TRUE
HEG1	Q9ULI3	ENSG00000173706	heart development protein with EGF like domains 1 [Source:HGNC Symbol;Acc:HGNC:29227]	TRUE	OID44699	NA	batch_2	NA	TRUE	TRUE
SUSD5	O60279	ENSG00000173705	sushi domain containing 5 [Source:HGNC Symbol;Acc:HGNC:29061]	TRUE	OID44967	NA	batch_2	NA	TRUE	TRUE
MUC13	Q9H3R2	ENSG00000173702	mucin 13, cell surface associated [Source:HGNC Symbol;Acc:HGNC:7511]	TRUE	OID42786	NA	batch_2	NA	TRUE	TRUE
SPATA3	Q8NHX4	ENSG00000173699	spermatogenesis associated 3 [Source:HGNC Symbol;Acc:HGNC:17884]	TRUE	OID41848	NA	batch_2	NA	TRUE	FALSE
ADGRG2	Q8IZP9	ENSG00000173698	adhesion G protein-coupled receptor G2 [Source:HGNC Symbol;Acc:HGNC:4516]	TRUE	OID44447	OID20189	batch_1+2	QuantileSmoothing	TRUE	TRUE
PSMD1	Q99460	ENSG00000173692	proteasome 26S subunit, non-ATPase 1 [Source:HGNC Symbol;Acc:HGNC:9554]	TRUE	OID44135	NA	batch_2	NA	TRUE	FALSE
EIF1AX	P47813	ENSG00000173674	eukaryotic translation initiation factor 1A X-linked [Source:HGNC Symbol;Acc:HGNC:3250]	TRUE	OID43662	NA	batch_2	NA	TRUE	FALSE
SLC19A1	P41440	ENSG00000173638	solute carrier family 19 member 1 [Source:HGNC Symbol;Acc:HGNC:10937]	TRUE	OID41812	NA	batch_2	NA	TRUE	FALSE
NMNAT1	Q9HAN9	ENSG00000173614	nicotinamide nucleotide adenylyltransferase 1 [Source:HGNC Symbol;Acc:HGNC:17877]	TRUE	OID44034	NA	batch_2	NA	TRUE	TRUE
NUDT4	Q9NZJ9	ENSG00000173598	nudix hydrolase 4 [Source:HGNC Symbol;Acc:HGNC:8051]	TRUE	OID40472	NA	batch_2	NA	TRUE	TRUE
CEP83	Q9Y592	ENSG00000173588	centrosomal protein 83 [Source:HGNC Symbol;Acc:HGNC:17966]	TRUE	OID40105	NA	batch_2	NA	TRUE	FALSE
CHD2	O14647	ENSG00000173575	chromodomain helicase DNA binding protein 2 [Source:HGNC Symbol;Acc:HGNC:1917]	TRUE	OID40115	NA	batch_2	NA	TRUE	FALSE
SNX33	Q8WV41	ENSG00000173548	sorting nexin 33 [Source:HGNC Symbol;Acc:HGNC:28468]	TRUE	OID44272	NA	batch_2	NA	TRUE	TRUE
CSPG4	Q6UVK1	ENSG00000173546	chondroitin sulfate proteoglycan 4 [Source:HGNC Symbol;Acc:HGNC:2466]	TRUE	OID45092	NA	batch_2	NA	TRUE	TRUE
TNFRSF10C	O14798	ENSG00000173535	TNF receptor superfamily member 10c [Source:HGNC Symbol;Acc:HGNC:11906]	TRUE	OID45281	OID20265	batch_1+2	QuantileSmoothing	TRUE	TRUE
MST1	P26927	ENSG00000173531	macrophage stimulating 1 [Source:HGNC Symbol;Acc:HGNC:7380]	TRUE	OID45386	NA	batch_2	NA	TRUE	TRUE
PEAK1	Q9H792	ENSG00000173517	pseudopodium enriched atypical kinase 1 [Source:HGNC Symbol;Acc:HGNC:29431]	TRUE	OID41607	NA	batch_2	NA	TRUE	FALSE
VEGFB	P49765	ENSG00000173511	vascular endothelial growth factor B [Source:HGNC Symbol;Acc:HGNC:12681]	TRUE	OID44390	NA	batch_2	NA	TRUE	FALSE
AGR3	Q8TD06	ENSG00000173467	anterior gradient 3, protein disulphide isomerase family member [Source:HGNC Symbol;Acc:HGNC:24167]	TRUE	OID42098	NA	batch_2	NA	TRUE	FALSE
ZNRD2	O60232	ENSG00000173465	zinc ribbon domain containing 2 [Source:HGNC Symbol;Acc:HGNC:11328]	TRUE	OID44429	NA	batch_2	NA	TRUE	FALSE
IHO1	Q8IYA8	ENSG00000173421	interactor of HORMAD1 1 [Source:HGNC Symbol;Acc:HGNC:27945]	TRUE	OID41324	NA	batch_2	NA	TRUE	FALSE
DAB1	O75553	ENSG00000173406	DAB adaptor protein 1 [Source:HGNC Symbol;Acc:HGNC:2661]	TRUE	OID40147	NA	batch_2	NA	TRUE	FALSE
DAG1	Q14118	ENSG00000173402	dystroglycan 1 [Source:HGNC Symbol;Acc:HGNC:2666]	TRUE	OID44591	OID20774	batch_1+2	QuantileSmoothing	TRUE	TRUE
OLR1	P78380	ENSG00000173391	oxidized low density lipoprotein receptor 1 [Source:HGNC Symbol;Acc:HGNC:8133]	TRUE	OID44826	OID20183	batch_1+2	QuantileSmoothing	TRUE	TRUE
C1QA	P02745	ENSG00000173372	complement C1q A chain [Source:HGNC Symbol;Acc:HGNC:1241]	TRUE	OID43432	OID20654	batch_1+2	QuantileSmoothing	TRUE	TRUE
STOX2	Q9P2F5	ENSG00000173320	storkhead box 2 [Source:HGNC Symbol;Acc:HGNC:25450]	TRUE	OID41891	NA	batch_2	NA	TRUE	FALSE
PPP1R3B	Q86XI6	ENSG00000173281	protein phosphatase 1 regulatory subunit 3B [Source:HGNC Symbol;Acc:HGNC:14942]	TRUE	OID41659	NA	batch_2	NA	TRUE	FALSE
MMRN2	Q9H8L6	ENSG00000173269	multimerin 2 [Source:HGNC Symbol;Acc:HGNC:19888]	TRUE	OID44788	NA	batch_2	NA	TRUE	TRUE
SNCG	O76070	ENSG00000173267	synuclein gamma [Source:HGNC Symbol;Acc:HGNC:11141]	TRUE	OID44266	NA	batch_2	NA	TRUE	TRUE
GLRX	P35754	ENSG00000173221	glutaredoxin [Source:HGNC Symbol;Acc:HGNC:4330]	TRUE	OID44685	OID20195	batch_1+2	QuantileSmoothing	TRUE	TRUE
TUBB8B	A6NNZ2	ENSG00000173213	tubulin beta 8B [Source:HGNC Symbol;Acc:HGNC:24983]	TRUE	OID40687	NA	batch_2	NA	TRUE	FALSE
ABLIM3	O94929	ENSG00000173210	actin binding LIM protein family member 3 [Source:HGNC Symbol;Acc:HGNC:29132]	TRUE	OID40758	NA	batch_2	NA	TRUE	TRUE
AHSA2P	Q719I0	ENSG00000173209	activator of HSP90 ATPase homolog 2, pseudogene [Source:HGNC Symbol;Acc:HGNC:20437]	TRUE	OID40775	NA	batch_2	NA	TRUE	FALSE
ADCY5	O95622	ENSG00000173175	adenylate cyclase 5 [Source:HGNC Symbol;Acc:HGNC:236]	TRUE	OID40766	NA	batch_2	NA	TRUE	TRUE
COMMD1	Q8N668	ENSG00000173163	copper metabolism domain containing 1 [Source:HGNC Symbol;Acc:HGNC:23024]	TRUE	OID43554	NA	batch_2	NA	TRUE	FALSE
CCDC63	Q8NA47	ENSG00000173093	coiled-coil domain containing 63 [Source:HGNC Symbol;Acc:HGNC:26669]	TRUE	OID40952	NA	batch_2	NA	TRUE	FALSE
HPSE	Q9Y251	ENSG00000173083	heparanase [Source:HGNC Symbol;Acc:HGNC:5164]	TRUE	OID45143	NA	batch_2	NA	TRUE	TRUE
FAM222B	Q8WU58	ENSG00000173065	family with sequence similarity 222 member B [Source:HGNC Symbol;Acc:HGNC:25563]	TRUE	OID40226	NA	batch_2	NA	TRUE	FALSE
ARPP21	Q9UBL0	ENSG00000172995	cAMP regulated phosphoprotein 21 [Source:HGNC Symbol;Acc:HGNC:16968]	TRUE	OID40034	NA	batch_2	NA	TRUE	FALSE
NBEA	Q8NFP9	ENSG00000172915	neurobeachin [Source:HGNC Symbol;Acc:HGNC:7648]	TRUE	OID40445	NA	batch_2	NA	TRUE	TRUE
LVRN	Q6Q4G3	ENSG00000172901	laeverin [Source:HGNC Symbol;Acc:HGNC:26904]	TRUE	OID40379	NA	batch_2	NA	TRUE	FALSE
EGFL7	Q9UHF1	ENSG00000172889	EGF like domain multiple 7 [Source:HGNC Symbol;Acc:HGNC:20594]	TRUE	OID42398	NA	batch_2	NA	TRUE	TRUE
METAP1D	Q6UB28	ENSG00000172878	methionyl aminopeptidase type 1D, mitochondrial [Source:HGNC Symbol;Acc:HGNC:32583]	TRUE	OID43969	OID20519	batch_1+2	QuantileSmoothing	TRUE	TRUE
SP3	Q02447	ENSG00000172845	Sp3 transcription factor [Source:HGNC Symbol;Acc:HGNC:11208]	TRUE	OID41839	NA	batch_2	NA	TRUE	FALSE
CES2	O00748	ENSG00000172831	carboxylesterase 2 [Source:HGNC Symbol;Acc:HGNC:1864]	TRUE	OID43520	NA	batch_2	NA	TRUE	TRUE
SSH3	Q8TE77	ENSG00000172830	slingshot protein phosphatase 3 [Source:HGNC Symbol;Acc:HGNC:30581]	TRUE	OID43134	NA	batch_2	NA	TRUE	TRUE
CES3	Q6UWW8	ENSG00000172828	carboxylesterase 3 [Source:HGNC Symbol;Acc:HGNC:1865]	TRUE	OID43521	NA	batch_2	NA	TRUE	FALSE
DCP2	Q8IU60	ENSG00000172795	decapping mRNA 2 [Source:HGNC Symbol;Acc:HGNC:24452]	TRUE	OID41083	NA	batch_2	NA	TRUE	FALSE
RAB37	Q96AX2	ENSG00000172794	RAB37, member RAS oncogene family [Source:HGNC Symbol;Acc:HGNC:30268]	TRUE	OID42974	OID20425	batch_1+2	MedianCentering	TRUE	TRUE
EFCAB12	Q6NXP0	ENSG00000172771	EF-hand calcium binding domain 12 [Source:HGNC Symbol;Acc:HGNC:28061]	TRUE	OID41146	NA	batch_2	NA	TRUE	FALSE
MUS81	Q96NY9	ENSG00000172732	MUS81 structure-specific endonuclease subunit [Source:HGNC Symbol;Acc:HGNC:29814]	TRUE	OID40431	NA	batch_2	NA	TRUE	FALSE
CCL19	Q99731	ENSG00000172724	C-C motif chemokine ligand 19 [Source:HGNC Symbol;Acc:HGNC:10617]	TRUE	OID44497	NA	batch_2	NA	TRUE	TRUE
GARIN2	Q8N9W8	ENSG00000172717	golgi associated RAB2 interactor family member 2 [Source:HGNC Symbol;Acc:HGNC:20101]	TRUE	OID41231	NA	batch_2	NA	TRUE	FALSE
ZFAND4	Q86XD8	ENSG00000172671	zinc finger AN1-type containing 4 [Source:HGNC Symbol;Acc:HGNC:23504]	TRUE	OID40732	NA	batch_2	NA	TRUE	FALSE
ZMAT3	Q9HA38	ENSG00000172667	zinc finger matrin-type 3 [Source:HGNC Symbol;Acc:HGNC:29983]	TRUE	OID42055	NA	batch_2	NA	TRUE	TRUE
EFEMP2	O95967	ENSG00000172638	EGF containing fibulin extracellular matrix protein 2 [Source:HGNC Symbol;Acc:HGNC:3219]	TRUE	OID44617	NA	batch_2	NA	TRUE	TRUE
SMPDL3A	Q92484	ENSG00000172594	sphingomyelin phosphodiesterase acid like 3A [Source:HGNC Symbol;Acc:HGNC:17389]	TRUE	OID44941	OID20676	batch_1+2	MedianCentering	TRUE	TRUE
MRPL52	Q86TS9	ENSG00000172590	mitochondrial ribosomal protein L52 [Source:HGNC Symbol;Acc:HGNC:16655]	TRUE	OID42775	NA	batch_2	NA	TRUE	FALSE
CTSW	P56202	ENSG00000172543	cathepsin W [Source:HGNC Symbol;Acc:HGNC:2546]	TRUE	OID42337	NA	batch_2	NA	TRUE	FALSE
FAM170B	A6NMN3	ENSG00000172538	family with sequence similarity 170 member B [Source:HGNC Symbol;Acc:HGNC:19736]	TRUE	OID40221	NA	batch_2	NA	TRUE	FALSE
BANP	Q8N9N5	ENSG00000172530	BTG3 associated nuclear protein [Source:HGNC Symbol;Acc:HGNC:13450]	TRUE	OID40049	NA	batch_2	NA	TRUE	FALSE
ACOT12	Q8WYK0	ENSG00000172497	acyl-CoA thioesterase 12 [Source:HGNC Symbol;Acc:HGNC:24436]	TRUE	OID40762	NA	batch_2	NA	TRUE	FALSE
AGXT	P21549	ENSG00000172482	alanine--glyoxylate aminotransferase [Source:HGNC Symbol;Acc:HGNC:341]	TRUE	OID44453	OID20139	batch_1+2	QuantileSmoothing	TRUE	TRUE
TCEAL1	Q15170	ENSG00000172465	transcription elongation factor A like 1 [Source:HGNC Symbol;Acc:HGNC:11616]	TRUE	OID41917	NA	batch_2	NA	TRUE	FALSE
IL17D	Q8TAD2	ENSG00000172458	interleukin 17D [Source:HGNC Symbol;Acc:HGNC:5984]	TRUE	OID42605	OID20481	batch_1+2	QuantileSmoothing	TRUE	TRUE
GTPBP2	Q9BX10	ENSG00000172432	GTP binding protein 2 [Source:HGNC Symbol;Acc:HGNC:4670]	TRUE	OID42545	NA	batch_2	NA	TRUE	FALSE
INSL5	Q9Y5Q6	ENSG00000172410	insulin like 5 [Source:HGNC Symbol;Acc:HGNC:6088]	TRUE	OID43866	NA	batch_2	NA	TRUE	FALSE
PRSS27	Q9BQR3	ENSG00000172382	serine protease 27 [Source:HGNC Symbol;Acc:HGNC:15475]	TRUE	OID44873	OID20212	batch_1+2	QuantileSmoothing	TRUE	TRUE
C2CD2L	O14523	ENSG00000172375	C2CD2 like [Source:HGNC Symbol;Acc:HGNC:29000]	TRUE	OID42202	NA	batch_2	NA	TRUE	TRUE
IL16	Q14005	ENSG00000172349	interleukin 16 [Source:HGNC Symbol;Acc:HGNC:5980]	TRUE	OID43845	OID20633	batch_1+2	MedianCentering	TRUE	TRUE
CLEC12A	Q5QGZ9	ENSG00000172322	C-type lectin domain family 12 member A [Source:HGNC Symbol;Acc:HGNC:31713]	TRUE	OID43532	NA	batch_2	NA	TRUE	TRUE
CDY1	Q9Y6F8	ENSG00000172288	chromodomain Y-linked 1 [Source:HGNC Symbol;Acc:HGNC:1809]	TRUE	OID40984	NA	batch_2	NA	TRUE	FALSE
BSG	P35613	ENSG00000172270	basigin (Ok blood group) [Source:HGNC Symbol;Acc:HGNC:1116]	TRUE	OID43427	OID20626	batch_1+2	QuantileSmoothing	TRUE	TRUE
MACROD2	A1Z1Q3	ENSG00000172264	mono-ADP ribosylhydrolase 2 [Source:HGNC Symbol;Acc:HGNC:16126]	TRUE	OID40382	NA	batch_2	NA	TRUE	TRUE
ZNF131	P52739	ENSG00000172262	zinc finger protein 131 [Source:HGNC Symbol;Acc:HGNC:12915]	TRUE	OID40740	NA	batch_2	NA	TRUE	FALSE
C5orf34	Q96MH7	ENSG00000172244	chromosome 5 open reading frame 34 [Source:HGNC Symbol;Acc:HGNC:24738]	TRUE	OID40908	NA	batch_2	NA	TRUE	TRUE
CLEC7A	Q9BXN2	ENSG00000172243	C-type lectin domain containing 7A [Source:HGNC Symbol;Acc:HGNC:14558]	TRUE	OID43538	NA	batch_2	NA	TRUE	TRUE
PAIP1	Q9H074	ENSG00000172239	poly(A) binding protein interacting protein 1 [Source:HGNC Symbol;Acc:HGNC:16945]	TRUE	OID42876	NA	batch_2	NA	TRUE	TRUE
TPSAB1	Q15661	ENSG00000172236	tryptase alpha/beta 1 [Source:HGNC Symbol;Acc:HGNC:12019]	TRUE	OID44356	OID20642	batch_1+2	MedianCentering	TRUE	TRUE
AZU1	P20160	ENSG00000172232	azurocidin 1 [Source:HGNC Symbol;Acc:HGNC:913]	TRUE	OID45037	OID20309	batch_1+2	MedianCentering	TRUE	TRUE
CEBPB	P17676	ENSG00000172216	CCAAT enhancer binding protein beta [Source:HGNC Symbol;Acc:HGNC:1834]	TRUE	OID40986	OID20052	batch_1+2	QuantileSmoothing	TRUE	TRUE
ID4	P47928	ENSG00000172201	inhibitor of DNA binding 4 [Source:HGNC Symbol;Acc:HGNC:5363]	TRUE	OID42581	NA	batch_2	NA	TRUE	FALSE
PRL	P01236	ENSG00000172179	prolactin [Source:HGNC Symbol;Acc:HGNC:9445]	TRUE	OID44871	NA	batch_2	NA	TRUE	TRUE
CCL11	P51671	ENSG00000172156	C-C motif chemokine ligand 11 [Source:HGNC Symbol;Acc:HGNC:10610]	TRUE	OID43468	OID20668	batch_1+2	MedianCentering	TRUE	TRUE
CALB2	P22676	ENSG00000172137	calbindin 2 [Source:HGNC Symbol;Acc:HGNC:1435]	TRUE	OID42214	NA	batch_2	NA	TRUE	FALSE
EIF2AK3	Q9NZJ5	ENSG00000172071	eukaryotic translation initiation factor 2 alpha kinase 3 [Source:HGNC Symbol;Acc:HGNC:3255]	TRUE	OID42400	NA	batch_2	NA	TRUE	FALSE
SERF1A_SERF1B	O75920	ENSG00000172058, ENSG00000205572	small EDRK-rich factor 1A [Source:HGNC Symbol;Acc:HGNC:10755], small EDRK-rich factor 1B [Source:HGNC Symbol;Acc:HGNC:10756]	TRUE	OID41783	NA	batch_2	NA	TRUE	FALSE
LAMB2	P55268	ENSG00000172037	laminin subunit beta 2 [Source:HGNC Symbol;Acc:HGNC:6487]	TRUE	OID45171	NA	batch_2	NA	TRUE	TRUE
REG1B	P48304	ENSG00000172023	regenerating family member 1 beta [Source:HGNC Symbol;Acc:HGNC:9952]	TRUE	OID45244	OID20266	batch_1+2	MedianCentering	TRUE	TRUE
GAP43	P17677	ENSG00000172020	growth associated protein 43 [Source:HGNC Symbol;Acc:HGNC:4140]	TRUE	OID41228	NA	batch_2	NA	TRUE	FALSE
REG3A	Q06141	ENSG00000172016	regenerating family member 3 alpha [Source:HGNC Symbol;Acc:HGNC:8601]	TRUE	OID45245	OID20258	batch_1+2	MedianCentering	TRUE	TRUE
ANKRD20A4P	Q4UJ75	ENSG00000172014	ankyrin repeat domain 20 family member A4, pseudogene [Source:HGNC Symbol;Acc:HGNC:31982]	TRUE	OID40797	NA	batch_2	NA	TRUE	FALSE
THOP1	P52888	ENSG00000172009	thimet oligopeptidase 1 [Source:HGNC Symbol;Acc:HGNC:11793]	TRUE	OID44978	OID20194	batch_1+2	QuantileSmoothing	TRUE	TRUE
DRC3	Q9H069	ENSG00000171962	dynein regulatory complex subunit 3 [Source:HGNC Symbol;Acc:HGNC:25384]	TRUE	OID40176	NA	batch_2	NA	TRUE	FALSE
SCG2	P13521	ENSG00000171951	secretogranin II [Source:HGNC Symbol;Acc:HGNC:10575]	TRUE	OID44211	NA	batch_2	NA	TRUE	TRUE
ZNF217	O75362	ENSG00000171940	zinc finger protein 217 [Source:HGNC Symbol;Acc:HGNC:13009]	TRUE	OID42059	NA	batch_2	NA	TRUE	TRUE
PRND	Q9UKY0	ENSG00000171864	prion like protein doppel [Source:HGNC Symbol;Acc:HGNC:15748]	TRUE	OID44126	NA	batch_2	NA	TRUE	FALSE
PTEN	P60484	ENSG00000171862	phosphatase and tensin homolog [Source:HGNC Symbol;Acc:HGNC:9588]	TRUE	OID42963	NA	batch_2	NA	TRUE	TRUE
IFNB1	P01574	ENSG00000171855	interferon beta 1 [Source:HGNC Symbol;Acc:HGNC:5434]	TRUE	OID40302	NA	batch_2	NA	TRUE	FALSE
RRM2	P31350	ENSG00000171848	ribonucleotide reductase regulatory subunit M2 [Source:HGNC Symbol;Acc:HGNC:10452]	TRUE	OID43033	NA	batch_2	NA	TRUE	FALSE
NINJ2	Q9NZG7	ENSG00000171840	ninjurin 2 [Source:HGNC Symbol;Acc:HGNC:7825]	TRUE	OID40461	NA	batch_2	NA	TRUE	FALSE
EXOSC10	Q01780	ENSG00000171824	exosome component 10 [Source:HGNC Symbol;Acc:HGNC:9138]	TRUE	OID42433	NA	batch_2	NA	TRUE	TRUE
ANGPTL7	O43827	ENSG00000171819	angiopoietin like 7 [Source:HGNC Symbol;Acc:HGNC:24078]	TRUE	OID43363	NA	batch_2	NA	TRUE	TRUE
CFAP46	Q8IYW2	ENSG00000171811	cilia and flagella associated protein 46 [Source:HGNC Symbol;Acc:HGNC:25247]	TRUE	OID41002	NA	batch_2	NA	TRUE	FALSE
KNDC1	Q76NI1	ENSG00000171798	kinase non-catalytic C-lobe domain containing 1 [Source:HGNC Symbol;Acc:HGNC:29374]	TRUE	OID40353	NA	batch_2	NA	TRUE	FALSE
CTPS1	P17812	ENSG00000171793	CTP synthase 1 [Source:HGNC Symbol;Acc:HGNC:2519]	TRUE	OID42336	NA	batch_2	NA	TRUE	FALSE
BCL2	P10415	ENSG00000171791	BCL2 apoptosis regulator [Source:HGNC Symbol;Acc:HGNC:990]	TRUE	OID43409	NA	batch_2	NA	TRUE	TRUE
NXNL1	Q96CM4	ENSG00000171773	nucleoredoxin like 1 [Source:HGNC Symbol;Acc:HGNC:25179]	TRUE	OID41569	NA	batch_2	NA	TRUE	FALSE
LGALS4	P56470	ENSG00000171747	galectin 4 [Source:HGNC Symbol;Acc:HGNC:6565]	TRUE	OID44749	OID20748	batch_1+2	QuantileSmoothing	TRUE	TRUE
DEFB4A_DEFB4B	O15263	ENSG00000171711, ENSG00000177257	defensin beta 4A [Source:HGNC Symbol;Acc:HGNC:2767], defensin beta 4B [Source:HGNC Symbol;Acc:HGNC:30193]	TRUE	OID43603	NA	batch_2	NA	TRUE	TRUE
TCEA2	Q15560	ENSG00000171703	transcription elongation factor A2 [Source:HGNC Symbol;Acc:HGNC:11614]	TRUE	OID41916	NA	batch_2	NA	TRUE	FALSE
PLEKHG5	O94827	ENSG00000171680	pleckstrin homology and RhoGEF domain containing G5 [Source:HGNC Symbol;Acc:HGNC:29105]	TRUE	OID41628	NA	batch_2	NA	TRUE	FALSE
S100Z	Q8WXG8	ENSG00000171643	S100 calcium binding protein Z [Source:HGNC Symbol;Acc:HGNC:30367]	TRUE	OID41762	NA	batch_2	NA	TRUE	TRUE
PIK3CD	O00329	ENSG00000171608	phosphatidylinositol-4,5-bisphosphate 3-kinase catalytic subunit delta [Source:HGNC Symbol;Acc:HGNC:8977]	TRUE	OID40503	NA	batch_2	NA	TRUE	FALSE
ZNF274	Q96GC6	ENSG00000171606	zinc finger protein 274 [Source:HGNC Symbol;Acc:HGNC:13068]	TRUE	OID43302	NA	batch_2	NA	TRUE	TRUE
DSCAM	O60469	ENSG00000171587	DS cell adhesion molecule [Source:HGNC Symbol;Acc:HGNC:3039]	TRUE	OID42386	NA	batch_2	NA	TRUE	FALSE
PLRG1	O43660	ENSG00000171566	pleiotropic regulator 1 [Source:HGNC Symbol;Acc:HGNC:9089]	TRUE	OID41633	NA	batch_2	NA	TRUE	FALSE
FGA	P02671	ENSG00000171560	fibrinogen alpha chain [Source:HGNC Symbol;Acc:HGNC:3661]	TRUE	OID45464	NA	batch_2	NA	TRUE	TRUE
FGG	P02679	ENSG00000171557	fibrinogen gamma chain [Source:HGNC Symbol;Acc:HGNC:3694]	TRUE	OID45465	NA	batch_2	NA	TRUE	TRUE
BCL2L1	Q07817	ENSG00000171552	BCL2 like 1 [Source:HGNC Symbol;Acc:HGNC:992]	TRUE	OID43410	NA	batch_2	NA	TRUE	FALSE
TBCA	O75347	ENSG00000171530	tubulin folding cofactor A [Source:HGNC Symbol;Acc:HGNC:11579]	TRUE	OID44970	NA	batch_2	NA	TRUE	TRUE
COL24A1	Q17RW2	ENSG00000171502	collagen type XXIV alpha 1 chain [Source:HGNC Symbol;Acc:HGNC:20821]	TRUE	OID43550	NA	batch_2	NA	TRUE	TRUE
SPACA5	Q96QH8	ENSG00000171489	sperm acrosome associated 5 [Source:HGNC Symbol;Acc:HGNC:31353]	TRUE	OID43118	NA	batch_2	NA	TRUE	FALSE
KRT20	P35900	ENSG00000171431	keratin 20 [Source:HGNC Symbol;Acc:HGNC:20412]	TRUE	OID40360	NA	batch_2	NA	TRUE	FALSE
LURAP1	Q96LR2	ENSG00000171357	leucine rich adaptor protein 1 [Source:HGNC Symbol;Acc:HGNC:32327]	TRUE	OID41434	NA	batch_2	NA	TRUE	FALSE
KRT19	P08727	ENSG00000171345	keratin 19 [Source:HGNC Symbol;Acc:HGNC:6436]	TRUE	OID43904	OID20596	batch_1+2	QuantileSmoothing	TRUE	TRUE
CANT1	Q8WVQ1	ENSG00000171302	calcium activated nucleotidase 1 [Source:HGNC Symbol;Acc:HGNC:19721]	TRUE	OID44491	OID20181	batch_1+2	QuantileSmoothing	TRUE	TRUE
NPTX1	Q15818	ENSG00000171246	neuronal pentraxin 1 [Source:HGNC Symbol;Acc:HGNC:7952]	TRUE	OID45202	NA	batch_2	NA	TRUE	TRUE
SOSTDC1	Q6X4U4	ENSG00000171243	sclerostin domain containing 1 [Source:HGNC Symbol;Acc:HGNC:21748]	TRUE	OID43112	NA	batch_2	NA	TRUE	FALSE
LRG1	P02750	ENSG00000171236	leucine rich alpha-2-glycoprotein 1 [Source:HGNC Symbol;Acc:HGNC:29480]	TRUE	OID45476	NA	batch_2	NA	TRUE	TRUE
CDC42BPG	Q6DT37	ENSG00000171219	CDC42 binding protein kinase gamma [Source:HGNC Symbol;Acc:HGNC:29829]	TRUE	OID42249	NA	batch_2	NA	TRUE	FALSE
NETO2	Q8NC67	ENSG00000171208	neuropilin and tolloid like 2 [Source:HGNC Symbol;Acc:HGNC:14644]	TRUE	OID40456	NA	batch_2	NA	TRUE	TRUE
MUC7	Q8TAX7	ENSG00000171195	mucin 7, secreted [Source:HGNC Symbol;Acc:HGNC:7518]	TRUE	OID40430	NA	batch_2	NA	TRUE	FALSE
RBKS	Q9H477	ENSG00000171174	ribokinase [Source:HGNC Symbol;Acc:HGNC:30325]	TRUE	OID44169	NA	batch_2	NA	TRUE	TRUE
MORN4	Q8NDC4	ENSG00000171160	MORN repeat containing 4 [Source:HGNC Symbol;Acc:HGNC:24001]	TRUE	OID42769	NA	batch_2	NA	TRUE	FALSE
C1GALT1C1	Q96EU7	ENSG00000171155	C1GALT1 specific chaperone 1 [Source:HGNC Symbol;Acc:HGNC:24338]	TRUE	OID43431	NA	batch_2	NA	TRUE	FALSE
TADA3	O75528	ENSG00000171148	transcriptional adaptor 3 [Source:HGNC Symbol;Acc:HGNC:19422]	TRUE	OID44305	NA	batch_2	NA	TRUE	FALSE
RLN3	Q8WXF3	ENSG00000171136	relaxin 3 [Source:HGNC Symbol;Acc:HGNC:17135]	TRUE	OID41729	NA	batch_2	NA	TRUE	FALSE
FUT3_FUT5	P21217_Q11128	ENSG00000171124, ENSG00000130383	fucosyltransferase 3 (Lewis blood group) [Source:HGNC Symbol;Acc:HGNC:4014], fucosyltransferase 5 [Source:HGNC Symbol;Acc:HGNC:4016]	FALSE	OID44667	NA	batch_2	NA	TRUE	TRUE
NRTN	Q99748	ENSG00000171119	neurturin [Source:HGNC Symbol;Acc:HGNC:8007]	TRUE	OID42851	OID20465	batch_1+2	QuantileSmoothing	TRUE	FALSE
HSFX1_HSFX2	Q9UBD0	ENSG00000171116, ENSG00000268738	heat shock transcription factor family, X-linked 1 [Source:HGNC Symbol;Acc:HGNC:29603], heat shock transcription factor family, X-linked 2 [Source:HGNC Symbol;Acc:HGNC:32701]	TRUE	OID40295	NA	batch_2	NA	TRUE	FALSE
GIMAP8	Q8ND71	ENSG00000171115	GTPase, IMAP family member 8 [Source:HGNC Symbol;Acc:HGNC:21792]	TRUE	OID42516	NA	batch_2	NA	TRUE	TRUE
INSR	P06213	ENSG00000171105	insulin receptor [Source:HGNC Symbol;Acc:HGNC:6091]	TRUE	OID43867	NA	batch_2	NA	TRUE	TRUE
OBP2B	Q9NPH6	ENSG00000171102	odorant binding protein 2B [Source:HGNC Symbol;Acc:HGNC:23381]	TRUE	OID44053	NA	batch_2	NA	TRUE	TRUE
KYAT1	Q16773	ENSG00000171097	kynurenine aminotransferase 1 [Source:HGNC Symbol;Acc:HGNC:1564]	TRUE	OID44735	OID20232	batch_1+2	MedianCentering	TRUE	TRUE
ALK	Q9UM73	ENSG00000171094	ALK receptor tyrosine kinase [Source:HGNC Symbol;Acc:HGNC:427]	TRUE	OID40786	NA	batch_2	NA	TRUE	FALSE
SOX7	Q9BT81	ENSG00000171056	SRY-box transcription factor 7 [Source:HGNC Symbol;Acc:HGNC:18196]	TRUE	OID40612	NA	batch_2	NA	TRUE	FALSE
FEZ2	Q9UHY8	ENSG00000171055	fasciculation and elongation protein zeta 2 [Source:HGNC Symbol;Acc:HGNC:3660]	TRUE	OID41207	NA	batch_2	NA	TRUE	FALSE
HS6ST2	Q96MM7	ENSG00000171004	heparan sulfate 6-O-sulfotransferase 2 [Source:HGNC Symbol;Acc:HGNC:19133]	TRUE	OID42575	NA	batch_2	NA	TRUE	FALSE
DDI1	Q8WTU0	ENSG00000170967	DNA damage inducible 1 homolog 1 [Source:HGNC Symbol;Acc:HGNC:18961]	TRUE	OID40152	NA	batch_2	NA	TRUE	FALSE
PDGFD	Q9GZP0	ENSG00000170962	platelet derived growth factor D [Source:HGNC Symbol;Acc:HGNC:30620]	TRUE	OID44840	NA	batch_2	NA	TRUE	TRUE
CEACAM3	P40198	ENSG00000170956	CEA cell adhesion molecule 3 [Source:HGNC Symbol;Acc:HGNC:1815]	TRUE	OID42259	NA	batch_2	NA	TRUE	FALSE
OSCAR	Q8IYS5	ENSG00000170909	osteoclast associated Ig-like receptor [Source:HGNC Symbol;Acc:HGNC:29960]	TRUE	OID44828	OID20776	batch_1+2	QuantileSmoothing	TRUE	TRUE
CYTL1	Q9NRR1	ENSG00000170891	cytokine like 1 [Source:HGNC Symbol;Acc:HGNC:24435]	TRUE	OID45102	NA	batch_2	NA	TRUE	TRUE
PLA2G1B	P04054	ENSG00000170890	phospholipase A2 group IB [Source:HGNC Symbol;Acc:HGNC:9030]	TRUE	OID45224	OID20252	batch_1+2	MedianCentering	TRUE	TRUE
MTSS1	O43312	ENSG00000170873	MTSS I-BAR domain containing 1 [Source:HGNC Symbol;Acc:HGNC:20443]	TRUE	OID43997	NA	batch_2	NA	TRUE	FALSE
KIAA0232	Q92628	ENSG00000170871	KIAA0232 [Source:HGNC Symbol;Acc:HGNC:28992]	TRUE	OID40334	NA	batch_2	NA	TRUE	FALSE
TRIAP1	O43715	ENSG00000170855	TP53 regulated inhibitor of apoptosis 1 [Source:HGNC Symbol;Acc:HGNC:26937]	TRUE	OID44358	NA	batch_2	NA	TRUE	TRUE
LMOD2	Q6P5Q4	ENSG00000170807	leiomodin 2 [Source:HGNC Symbol;Acc:HGNC:6648]	TRUE	OID42698	NA	batch_2	NA	TRUE	FALSE
SDR16C5	Q8N3Y7	ENSG00000170786	short chain dehydrogenase/reductase family 16C member 5 [Source:HGNC Symbol;Acc:HGNC:30311]	TRUE	OID41774	NA	batch_2	NA	TRUE	FALSE
TPD52L3	Q96J77	ENSG00000170777	TPD52 like 3 [Source:HGNC Symbol;Acc:HGNC:23382]	TRUE	OID41944	NA	batch_2	NA	TRUE	FALSE
AKAP13	Q12802	ENSG00000170776	A-kinase anchoring protein 13 [Source:HGNC Symbol;Acc:HGNC:371]	TRUE	OID40778	NA	batch_2	NA	TRUE	FALSE
GPR37	O15354	ENSG00000170775	G protein-coupled receptor 37 [Source:HGNC Symbol;Acc:HGNC:4494]	TRUE	OID43781	OID20095	batch_1+2	MedianCentering	TRUE	TRUE
TTLL6	Q8N841	ENSG00000170703	tubulin tyrosine ligase like 6 [Source:HGNC Symbol;Acc:HGNC:26664]	TRUE	OID40685	NA	batch_2	NA	TRUE	FALSE
RNF34	Q969K3	ENSG00000170633	ring finger protein 34 [Source:HGNC Symbol;Acc:HGNC:17297]	TRUE	OID40573	NA	batch_2	NA	TRUE	FALSE
FOXA3	P55318	ENSG00000170608	forkhead box A3 [Source:HGNC Symbol;Acc:HGNC:5023]	TRUE	OID42476	NA	batch_2	NA	TRUE	FALSE
STAT2	P52630	ENSG00000170581	signal transducer and activator of transcription 2 [Source:HGNC Symbol;Acc:HGNC:11363]	TRUE	OID44288	NA	batch_2	NA	TRUE	TRUE
EMB	Q6PCB8	ENSG00000170571	embigin [Source:HGNC Symbol;Acc:HGNC:30465]	TRUE	OID41156	NA	batch_2	NA	TRUE	FALSE
CDH2	P19022	ENSG00000170558	cadherin 2 [Source:HGNC Symbol;Acc:HGNC:1759]	TRUE	OID44526	OID20170	batch_1+2	QuantileSmoothing	TRUE	TRUE
SERPINB9	P50453	ENSG00000170542	serpin family B member 9 [Source:HGNC Symbol;Acc:HGNC:8955]	TRUE	OID44232	NA	batch_2	NA	TRUE	TRUE
LONRF2	Q1L5Z9	ENSG00000170500	LON peptidase N-terminal domain and ring finger 2 [Source:HGNC Symbol;Acc:HGNC:24788]	TRUE	OID40371	NA	batch_2	NA	TRUE	FALSE
KISS1	Q15726	ENSG00000170498	KiSS-1 metastasis suppressor [Source:HGNC Symbol;Acc:HGNC:6341]	TRUE	OID45169	NA	batch_2	NA	TRUE	FALSE
MZB1	Q8WU39	ENSG00000170476	marginal zone B and B1 cell specific protein [Source:HGNC Symbol;Acc:HGNC:30125]	TRUE	OID44799	OID20732	batch_1+2	MedianCentering	TRUE	TRUE
PYM1	Q9BRP8	ENSG00000170473	PYM homolog 1, exon junction complex associated factor [Source:HGNC Symbol;Acc:HGNC:30258]	TRUE	OID44885	NA	batch_2	NA	TRUE	TRUE
SPATA24	Q86W54	ENSG00000170469	spermatogenesis associated 24 [Source:HGNC Symbol;Acc:HGNC:27322]	TRUE	OID40616	NA	batch_2	NA	TRUE	FALSE
KRT6C	P48668	ENSG00000170465	keratin 6C [Source:HGNC Symbol;Acc:HGNC:20406]	TRUE	OID43905	NA	batch_2	NA	TRUE	FALSE
CD14	P08571	ENSG00000170458	CD14 molecule [Source:HGNC Symbol;Acc:HGNC:1628]	TRUE	OID45327	OID20378	batch_1+2	QuantileSmoothing	TRUE	TRUE
HARS1	P12081	ENSG00000170445	histidyl-tRNA synthetase 1 [Source:HGNC Symbol;Acc:HGNC:4816]	TRUE	OID45140	NA	batch_2	NA	TRUE	TRUE
MGMT	P16455	ENSG00000170430	O-6-methylguanine-DNA methyltransferase [Source:HGNC Symbol;Acc:HGNC:7059]	TRUE	OID43971	OID20588	batch_1+2	MedianCentering	TRUE	TRUE
KRT78	Q8N1N4	ENSG00000170423	keratin 78 [Source:HGNC Symbol;Acc:HGNC:28926]	TRUE	OID41399	NA	batch_2	NA	TRUE	FALSE
KRT8	P05787	ENSG00000170421	keratin 8 [Source:HGNC Symbol;Acc:HGNC:6446]	TRUE	OID42685	NA	batch_2	NA	TRUE	TRUE
GPRC5C	Q9NQ84	ENSG00000170412	G protein-coupled receptor class C group 5 member C [Source:HGNC Symbol;Acc:HGNC:13309]	TRUE	OID42531	NA	batch_2	NA	TRUE	FALSE
DCLK2	Q8N568	ENSG00000170390	doublecortin like kinase 2 [Source:HGNC Symbol;Acc:HGNC:19002]	TRUE	OID41081	NA	batch_2	NA	TRUE	FALSE
SP7	Q8TDD2	ENSG00000170374	Sp7 transcription factor [Source:HGNC Symbol;Acc:HGNC:17321]	TRUE	OID41840	NA	batch_2	NA	TRUE	FALSE
CST1	P01037	ENSG00000170373	cystatin SN [Source:HGNC Symbol;Acc:HGNC:2473]	TRUE	OID44575	NA	batch_2	NA	TRUE	TRUE
CST5	P28325	ENSG00000170367	cystatin D [Source:HGNC Symbol;Acc:HGNC:2477]	TRUE	OID43576	NA	batch_2	NA	TRUE	TRUE
SMAD1	Q15797	ENSG00000170365	SMAD family member 1 [Source:HGNC Symbol;Acc:HGNC:6767]	TRUE	OID43101	NA	batch_2	NA	TRUE	FALSE
SETMAR	Q53H47	ENSG00000170364	SET domain and mariner transposase fusion gene [Source:HGNC Symbol;Acc:HGNC:10762]	TRUE	OID44234	NA	batch_2	NA	TRUE	TRUE
TMED10	P49755	ENSG00000170348	transmembrane p24 trafficking protein 10 [Source:HGNC Symbol;Acc:HGNC:16998]	TRUE	OID43199	NA	batch_2	NA	TRUE	FALSE
FOS	P01100	ENSG00000170345	Fos proto-oncogene, AP-1 transcription factor subunit [Source:HGNC Symbol;Acc:HGNC:3796]	TRUE	OID42475	NA	batch_2	NA	TRUE	FALSE
FABP4	P15090	ENSG00000170323	fatty acid binding protein 4 [Source:HGNC Symbol;Acc:HGNC:3559]	TRUE	OID45121	OID20245	batch_1+2	QuantileSmoothing	TRUE	TRUE
STX8	Q9UNK0	ENSG00000170310	syntaxin 8 [Source:HGNC Symbol;Acc:HGNC:11443]	TRUE	OID44294	OID20531	batch_1+2	QuantileSmoothing	TRUE	TRUE
GABARAP	O95166	ENSG00000170296	GABA type A receptor-associated protein [Source:HGNC Symbol;Acc:HGNC:4067]	TRUE	OID43734	NA	batch_2	NA	TRUE	FALSE
CNGB3	Q9NQW8	ENSG00000170289	cyclic nucleotide gated channel subunit beta 3 [Source:HGNC Symbol;Acc:HGNC:2153]	TRUE	OID42306	NA	batch_2	NA	TRUE	FALSE
CRTAP	O75718	ENSG00000170275	cartilage associated protein [Source:HGNC Symbol;Acc:HGNC:2379]	TRUE	OID42325	NA	batch_2	NA	TRUE	FALSE
GLB1	P16278	ENSG00000170266	galactosidase beta 1 [Source:HGNC Symbol;Acc:HGNC:4298]	TRUE	OID43759	NA	batch_2	NA	TRUE	FALSE
ZNF282	Q9UDV7	ENSG00000170265	zinc finger protein 282 [Source:HGNC Symbol;Acc:HGNC:13076]	TRUE	OID42061	NA	batch_2	NA	TRUE	TRUE
FAM161A	Q3B820	ENSG00000170264	FAM161 centrosomal protein A [Source:HGNC Symbol;Acc:HGNC:25808]	TRUE	OID41187	NA	batch_2	NA	TRUE	TRUE
MRAP	Q8TCY5	ENSG00000170262	melanocortin 2 receptor accessory protein [Source:HGNC Symbol;Acc:HGNC:1304]	TRUE	OID42772	NA	batch_2	NA	TRUE	FALSE
USP47	Q96K76	ENSG00000170242	ubiquitin specific peptidase 47 [Source:HGNC Symbol;Acc:HGNC:20076]	TRUE	OID43274	NA	batch_2	NA	TRUE	FALSE
FABP6	P51161	ENSG00000170231	fatty acid binding protein 6 [Source:HGNC Symbol;Acc:HGNC:3561]	TRUE	OID43695	OID20076	batch_1+2	MedianCentering	TRUE	TRUE
GYPA	P02724	ENSG00000170180	glycophorin A (MNS blood group) [Source:HGNC Symbol;Acc:HGNC:4702]	TRUE	OID40281	NA	batch_2	NA	TRUE	FALSE
SERPINA6	P08185	ENSG00000170099	serpin family A member 6 [Source:HGNC Symbol;Acc:HGNC:1540]	TRUE	OID45493	NA	batch_2	NA	TRUE	TRUE
SIMC1	Q8NDZ2	ENSG00000170085	SUMO interacting motifs containing 1 [Source:HGNC Symbol;Acc:HGNC:24779]	TRUE	OID41804	NA	batch_2	NA	TRUE	FALSE
FAM153A	Q9UHL3	ENSG00000170074	family with sequence similarity 153 member A [Source:HGNC Symbol;Acc:HGNC:29940]	TRUE	OID40218	NA	batch_2	NA	TRUE	FALSE
SERPINA9	Q86WD7	ENSG00000170054	serpin family A member 9 [Source:HGNC Symbol;Acc:HGNC:15995]	TRUE	OID44229	NA	batch_2	NA	TRUE	TRUE
ALCAM	Q13740	ENSG00000170017	activated leukocyte cell adhesion molecule [Source:HGNC Symbol;Acc:HGNC:400]	TRUE	OID45028	OID20273	batch_1+2	QuantileSmoothing	TRUE	TRUE
NLGN2	Q8NFZ4	ENSG00000169992	neuroligin 2 [Source:HGNC Symbol;Acc:HGNC:14290]	TRUE	OID42837	NA	batch_2	NA	TRUE	FALSE
ZNF35	P13682	ENSG00000169981	zinc finger protein 35 [Source:HGNC Symbol;Acc:HGNC:13099]	TRUE	OID42062	NA	batch_2	NA	TRUE	FALSE
BRD3	Q15059	ENSG00000169925	bromodomain containing 3 [Source:HGNC Symbol;Acc:HGNC:1104]	TRUE	OID42193	NA	batch_2	NA	TRUE	FALSE
GUSB	P08236	ENSG00000169919	glucuronidase beta [Source:HGNC Symbol;Acc:HGNC:4696]	TRUE	OID45139	OID20296	batch_1+2	MedianCentering	TRUE	TRUE
S100G	P29377	ENSG00000169906	S100 calcium binding protein G [Source:HGNC Symbol;Acc:HGNC:1436]	TRUE	OID44202	NA	batch_2	NA	TRUE	FALSE
PYDC1	Q8WXC3	ENSG00000169900	pyrin domain containing 1 [Source:HGNC Symbol;Acc:HGNC:30261]	TRUE	OID44157	NA	batch_2	NA	TRUE	TRUE
ITGAM	P11215	ENSG00000169896	integrin subunit alpha M [Source:HGNC Symbol;Acc:HGNC:6149]	TRUE	OID45165	NA	batch_2	NA	TRUE	TRUE
SYAP1	Q96A49	ENSG00000169895	synapse associated protein 1 [Source:HGNC Symbol;Acc:HGNC:16273]	TRUE	OID44968	NA	batch_2	NA	TRUE	FALSE
MUC3A	Q02505	ENSG00000169894	mucin 3A, cell surface associated [Source:HGNC Symbol;Acc:HGNC:7513]	TRUE	OID40429	NA	batch_2	NA	TRUE	FALSE
REPS2	Q8NFH8	ENSG00000169891	RALBP1 associated Eps domain containing 2 [Source:HGNC Symbol;Acc:HGNC:9963]	TRUE	OID41713	NA	batch_2	NA	TRUE	FALSE
CALML6	Q8TD86	ENSG00000169885	calmodulin like 6 [Source:HGNC Symbol;Acc:HGNC:24193]	TRUE	OID40921	NA	batch_2	NA	TRUE	FALSE
AHSP	Q9NZD4	ENSG00000169877	alpha hemoglobin stabilizing protein [Source:HGNC Symbol;Acc:HGNC:18075]	TRUE	OID45027	NA	batch_2	NA	TRUE	TRUE
ROBO1	Q9Y6N7	ENSG00000169855	roundabout guidance receptor 1 [Source:HGNC Symbol;Acc:HGNC:10249]	TRUE	OID44900	OID20734	batch_1+2	QuantileSmoothing	TRUE	TRUE
PCDH7	O60245	ENSG00000169851	protocadherin 7 [Source:HGNC Symbol;Acc:HGNC:8659]	TRUE	OID44077	NA	batch_2	NA	TRUE	TRUE
BTD	P43251	ENSG00000169814	biotinidase [Source:HGNC Symbol;Acc:HGNC:1122]	TRUE	OID45442	NA	batch_2	NA	TRUE	TRUE
NLGN1	Q8N2Q7	ENSG00000169760	neuroligin 1 [Source:HGNC Symbol;Acc:HGNC:14291]	TRUE	OID42836	NA	batch_2	NA	TRUE	FALSE
RAC3	P60763	ENSG00000169750	Rac family small GTPase 3 [Source:HGNC Symbol;Acc:HGNC:9803]	TRUE	OID42981	NA	batch_2	NA	TRUE	TRUE
DCXR	Q7Z4W1	ENSG00000169738	dicarbonyl and L-xylulose reductase [Source:HGNC Symbol;Acc:HGNC:18985]	TRUE	OID44597	NA	batch_2	NA	TRUE	TRUE
DUS1L	Q6P1R4	ENSG00000169718	dihydrouridine synthase 1 like [Source:HGNC Symbol;Acc:HGNC:30086]	TRUE	OID40179	NA	batch_2	NA	TRUE	FALSE
ASPSCR1	Q9BZE9	ENSG00000169696	ASPSCR1 tether for SLC2A4, UBX domain containing [Source:HGNC Symbol;Acc:HGNC:13825]	TRUE	OID43390	NA	batch_2	NA	TRUE	TRUE
LRRC45	Q96CN5	ENSG00000169683	leucine rich repeat containing 45 [Source:HGNC Symbol;Acc:HGNC:28302]	TRUE	OID42706	NA	batch_2	NA	TRUE	FALSE
APLF	Q8IW19	ENSG00000169621	aprataxin and PNKP like factor [Source:HGNC Symbol;Acc:HGNC:28724]	TRUE	OID40024	NA	batch_2	NA	TRUE	TRUE
CKAP2L	Q8IYA6	ENSG00000169607	cytoskeleton associated protein 2 like [Source:HGNC Symbol;Acc:HGNC:26877]	TRUE	OID41023	NA	batch_2	NA	TRUE	FALSE
GKN1	Q9NS71	ENSG00000169605	gastrokine 1 [Source:HGNC Symbol;Acc:HGNC:23217]	TRUE	OID43758	NA	batch_2	NA	TRUE	TRUE
NFU1	Q9UMS0	ENSG00000169599	NFU1 iron-sulfur cluster scaffold [Source:HGNC Symbol;Acc:HGNC:16287]	TRUE	OID44028	NA	batch_2	NA	TRUE	TRUE
BNC1	Q01954	ENSG00000169594	basonuclin zinc finger protein 1 [Source:HGNC Symbol;Acc:HGNC:1081]	TRUE	OID40867	NA	batch_2	NA	TRUE	FALSE
CLIC3	O95833	ENSG00000169583	chloride intracellular channel 3 [Source:HGNC Symbol;Acc:HGNC:2064]	TRUE	OID41028	NA	batch_2	NA	TRUE	FALSE
SPRR1B	P22528	ENSG00000169469	small proline rich protein 1B [Source:HGNC Symbol;Acc:HGNC:11260]	TRUE	OID43127	NA	batch_2	NA	TRUE	FALSE
CXCL8	P10145	ENSG00000169429	C-X-C motif chemokine ligand 8 [Source:HGNC Symbol;Acc:HGNC:6025]	TRUE	OID43586	OID20153	batch_1+2	MedianCentering	TRUE	TRUE
NPR1	P16066	ENSG00000169418	natriuretic peptide receptor 1 [Source:HGNC Symbol;Acc:HGNC:7943]	TRUE	OID42847	NA	batch_2	NA	TRUE	FALSE
RNASE6	Q93091	ENSG00000169413	ribonuclease A family member 6 [Source:HGNC Symbol;Acc:HGNC:10048]	TRUE	OID45408	NA	batch_2	NA	TRUE	TRUE
PTPN9	P43378	ENSG00000169410	protein tyrosine phosphatase non-receptor type 9 [Source:HGNC Symbol;Acc:HGNC:9661]	TRUE	OID42967	NA	batch_2	NA	TRUE	FALSE
RNASE3	P12724	ENSG00000169397	ribonuclease A family member 3 [Source:HGNC Symbol;Acc:HGNC:10046]	TRUE	OID44899	OID20203	batch_1+2	QuantileSmoothing	TRUE	TRUE
CRADD	P78560	ENSG00000169372	CASP2 and RIPK1 domain containing adaptor with death domain [Source:HGNC Symbol;Acc:HGNC:2340]	TRUE	OID43562	NA	batch_2	NA	TRUE	TRUE
GP2	P55259	ENSG00000169347	glycoprotein 2 [Source:HGNC Symbol;Acc:HGNC:4441]	TRUE	OID43771	OID20090	batch_1+2	QuantileSmoothing	TRUE	TRUE
UMOD	P07911	ENSG00000169344	uromodulin [Source:HGNC Symbol;Acc:HGNC:12559]	TRUE	OID45293	OID20237	batch_1+2	QuantileSmoothing	TRUE	TRUE
C22orf15	Q8WYQ4	ENSG00000169314	chromosome 22 open reading frame 15 [Source:HGNC Symbol;Acc:HGNC:15558]	TRUE	OID40892	NA	batch_2	NA	TRUE	TRUE
PGM2	Q96G03	ENSG00000169299	phosphoglucomutase 2 [Source:HGNC Symbol;Acc:HGNC:8906]	TRUE	OID42903	NA	batch_2	NA	TRUE	TRUE
SHE	Q5VZ18	ENSG00000169291	Src homology 2 domain containing E [Source:HGNC Symbol;Acc:HGNC:27004]	TRUE	OID40598	NA	batch_2	NA	TRUE	TRUE
ZRSR2	Q15696	ENSG00000169249	zinc finger CCCH-type, RNA binding motif and serine/arginine rich 2 [Source:HGNC Symbol;Acc:HGNC:23019]	TRUE	OID42076	NA	batch_2	NA	TRUE	FALSE
CXCL11	O14625	ENSG00000169248	C-X-C motif chemokine ligand 11 [Source:HGNC Symbol;Acc:HGNC:10638]	TRUE	OID44585	NA	batch_2	NA	TRUE	TRUE
CXCL10	P02778	ENSG00000169245	C-X-C motif chemokine ligand 10 [Source:HGNC Symbol;Acc:HGNC:10637]	TRUE	OID44584	OID20697	batch_1+2	QuantileSmoothing	TRUE	TRUE
EFNA1	P20827	ENSG00000169242	ephrin A1 [Source:HGNC Symbol;Acc:HGNC:3221]	TRUE	OID45114	NA	batch_2	NA	TRUE	TRUE
CA5B	Q9Y2D0	ENSG00000169239	carbonic anhydrase 5B [Source:HGNC Symbol;Acc:HGNC:1378]	TRUE	OID40917	NA	batch_2	NA	TRUE	FALSE
RSPO1	Q2MKA7	ENSG00000169218	R-spondin 1 [Source:HGNC Symbol;Acc:HGNC:21679]	TRUE	OID44194	NA	batch_2	NA	TRUE	TRUE
CD2BP2	O95400	ENSG00000169217	CD2 cytoplasmic tail binding protein 2 [Source:HGNC Symbol;Acc:HGNC:1656]	TRUE	OID40968	NA	batch_2	NA	TRUE	TRUE
RAB3B	P20337	ENSG00000169213	RAB3B, member RAS oncogene family [Source:HGNC Symbol;Acc:HGNC:9778]	TRUE	OID40542	NA	batch_2	NA	TRUE	FALSE
IL13	P35225	ENSG00000169194	interleukin 13 [Source:HGNC Symbol;Acc:HGNC:5973]	TRUE	OID42600	OID20430	batch_1+2	MedianCentering	TRUE	FALSE
APEX2	Q9UBZ4	ENSG00000169188	apurinic/apyrimidinic endodeoxyribonuclease 2 [Source:HGNC Symbol;Acc:HGNC:17889]	TRUE	OID40023	NA	batch_2	NA	TRUE	FALSE
MN1	Q10571	ENSG00000169184	MN1 proto-oncogene, transcriptional regulator [Source:HGNC Symbol;Acc:HGNC:7180]	TRUE	OID42765	NA	batch_2	NA	TRUE	FALSE
GSG1L	Q6UXU4	ENSG00000169181	GSG1 like [Source:HGNC Symbol;Acc:HGNC:28283]	TRUE	OID40278	NA	batch_2	NA	TRUE	FALSE
AFAP1L2	Q8N4X5	ENSG00000169129	actin filament associated protein 1 like 2 [Source:HGNC Symbol;Acc:HGNC:25901]	TRUE	OID42096	NA	batch_2	NA	TRUE	FALSE
PARM1	Q6UWI2	ENSG00000169116	prostate androgen-regulated mucin-like protein 1 [Source:HGNC Symbol;Acc:HGNC:24536]	TRUE	OID40486	NA	batch_2	NA	TRUE	FALSE
HSPBAP1	Q96EW2	ENSG00000169087	HSPB1 associated protein 1 [Source:HGNC Symbol;Acc:HGNC:16389]	TRUE	OID41308	NA	batch_2	NA	TRUE	FALSE
ROR2	Q01974	ENSG00000169071	receptor tyrosine kinase like orphan receptor 2 [Source:HGNC Symbol;Acc:HGNC:10257]	TRUE	OID40575	NA	batch_2	NA	TRUE	FALSE
UPF3A	Q9H1J1	ENSG00000169062	UPF3A regulator of nonsense mediated mRNA decay [Source:HGNC Symbol;Acc:HGNC:20332]	TRUE	OID43272	NA	batch_2	NA	TRUE	TRUE
MAP2K1	Q02750	ENSG00000169032	mitogen-activated protein kinase kinase 1 [Source:HGNC Symbol;Acc:HGNC:6840]	TRUE	OID44768	NA	batch_2	NA	TRUE	TRUE
SIGLEC7	Q9Y286	ENSG00000168995	sialic acid binding Ig like lectin 7 [Source:HGNC Symbol;Acc:HGNC:10876]	TRUE	OID44934	OID20190	batch_1+2	MedianCentering	TRUE	TRUE
PXDC1	Q5TGL8	ENSG00000168994	PX domain containing 1 [Source:HGNC Symbol;Acc:HGNC:21361]	TRUE	OID41680	NA	batch_2	NA	TRUE	FALSE
LGALS9	O00182	ENSG00000168961	galectin 9 [Source:HGNC Symbol;Acc:HGNC:6570]	TRUE	OID44751	OID20781	batch_1+2	QuantileSmoothing	TRUE	TRUE
CEP120	Q8N960	ENSG00000168944	centrosomal protein 120 [Source:HGNC Symbol;Acc:HGNC:26690]	TRUE	OID42271	NA	batch_2	NA	TRUE	TRUE
CTRB1	P17538	ENSG00000168925	chymotrypsinogen B1 [Source:HGNC Symbol;Acc:HGNC:2521]	TRUE	OID45097	NA	batch_2	NA	TRUE	TRUE
LETM1	O95202	ENSG00000168924	leucine zipper and EF-hand containing transmembrane protein 1 [Source:HGNC Symbol;Acc:HGNC:6556]	TRUE	OID43921	NA	batch_2	NA	TRUE	TRUE
INPP5D	Q92835	ENSG00000168918	inositol polyphosphate-5-phosphatase D [Source:HGNC Symbol;Acc:HGNC:6079]	TRUE	OID43862	NA	batch_2	NA	TRUE	TRUE
ZNF608	Q9ULD9	ENSG00000168916	zinc finger protein 608 [Source:HGNC Symbol;Acc:HGNC:29238]	TRUE	OID42067	NA	batch_2	NA	TRUE	FALSE
VAMP5	O95183	ENSG00000168899	vesicle associated membrane protein 5 [Source:HGNC Symbol;Acc:HGNC:12646]	TRUE	OID43275	OID20071	batch_1+2	MedianCentering	TRUE	TRUE
C2orf68	Q2NKX9	ENSG00000168887	chromosome 2 open reading frame 68 [Source:HGNC Symbol;Acc:HGNC:34353]	TRUE	OID40896	NA	batch_2	NA	TRUE	FALSE
SOX14	O95416	ENSG00000168875	SRY-box transcription factor 14 [Source:HGNC Symbol;Acc:HGNC:11193]	TRUE	OID43114	NA	batch_2	NA	TRUE	FALSE
ZBTB49	Q6ZSB9	ENSG00000168826	zinc finger and BTB domain containing 49 [Source:HGNC Symbol;Acc:HGNC:19883]	TRUE	OID42043	NA	batch_2	NA	TRUE	FALSE
NSG1	P42857	ENSG00000168824	neuronal vesicle trafficking associated 1 [Source:HGNC Symbol;Acc:HGNC:18790]	TRUE	OID41561	NA	batch_2	NA	TRUE	FALSE
IL12A_IL12B	P29459_P29460	ENSG00000168811, ENSG00000113302	interleukin 12A [Source:HGNC Symbol;Acc:HGNC:5969], interleukin 12B [Source:HGNC Symbol;Acc:HGNC:5970]	FALSE	OID43842	NA	batch_2	NA	TRUE	TRUE
SHOX2	O60902	ENSG00000168779	SHOX homeobox 2 [Source:HGNC Symbol;Acc:HGNC:10854]	TRUE	OID41797	NA	batch_2	NA	TRUE	FALSE
TET2	Q6N021	ENSG00000168769	tet methylcytosine dioxygenase 2 [Source:HGNC Symbol;Acc:HGNC:25941]	TRUE	OID43177	NA	batch_2	NA	TRUE	TRUE
GSTM4	Q03013	ENSG00000168765	glutathione S-transferase mu 4 [Source:HGNC Symbol;Acc:HGNC:4636]	TRUE	OID42541	NA	batch_2	NA	TRUE	FALSE
SEMA4C	Q9C0C4	ENSG00000168758	semaphorin 4C [Source:HGNC Symbol;Acc:HGNC:10731]	TRUE	OID44224	NA	batch_2	NA	TRUE	FALSE
CA7	P43166	ENSG00000168748	carbonic anhydrase 7 [Source:HGNC Symbol;Acc:HGNC:1381]	TRUE	OID42207	NA	batch_2	NA	TRUE	FALSE
DNAJC21	Q5F1R6	ENSG00000168724	DnaJ heat shock protein family (Hsp40) member C21 [Source:HGNC Symbol;Acc:HGNC:27030]	TRUE	OID43622	NA	batch_2	NA	TRUE	FALSE
WFDC12	Q8WWY7	ENSG00000168703	WAP four-disulfide core domain 12 [Source:HGNC Symbol;Acc:HGNC:16115]	TRUE	OID44411	NA	batch_2	NA	TRUE	TRUE
IL7R	P16871	ENSG00000168685	interleukin 7 receptor [Source:HGNC Symbol;Acc:HGNC:6024]	TRUE	OID45160	NA	batch_2	NA	TRUE	TRUE
KCTD19	Q17RG1	ENSG00000168676	potassium channel tetramerization domain containing 19 [Source:HGNC Symbol;Acc:HGNC:24753]	TRUE	OID41363	NA	batch_2	NA	TRUE	TRUE
LRATD2	Q96KN1	ENSG00000168672	LRAT domain containing 2 [Source:HGNC Symbol;Acc:HGNC:24166]	TRUE	OID41419	NA	batch_2	NA	TRUE	FALSE
MUCL3	Q3MIW9	ENSG00000168631	mucin like 3 [Source:HGNC Symbol;Acc:HGNC:21666]	TRUE	OID42788	NA	batch_2	NA	TRUE	FALSE
GDNF	P39905	ENSG00000168621	glial cell derived neurotrophic factor [Source:HGNC Symbol;Acc:HGNC:4232]	TRUE	OID42505	NA	batch_2	NA	TRUE	FALSE
ADAM9	Q13443	ENSG00000168615	ADAM metallopeptidase domain 9 [Source:HGNC Symbol;Acc:HGNC:216]	TRUE	OID43330	NA	batch_2	NA	TRUE	FALSE
ING2	Q9H160	ENSG00000168556	inhibitor of growth family member 2 [Source:HGNC Symbol;Acc:HGNC:6063]	TRUE	OID41327	NA	batch_2	NA	TRUE	FALSE
GFRA2	O00451	ENSG00000168546	GDNF family receptor alpha 2 [Source:HGNC Symbol;Acc:HGNC:4244]	TRUE	OID43747	NA	batch_2	NA	TRUE	TRUE
COL3A1	P02461	ENSG00000168542	collagen type III alpha 1 chain [Source:HGNC Symbol;Acc:HGNC:2201]	TRUE	OID45084	NA	batch_2	NA	TRUE	TRUE
CHRM1	P11229	ENSG00000168539	cholinergic receptor muscarinic 1 [Source:HGNC Symbol;Acc:HGNC:1950]	TRUE	OID42292	NA	batch_2	NA	TRUE	FALSE
MYL1	P05976	ENSG00000168530	myosin light chain 1 [Source:HGNC Symbol;Acc:HGNC:7582]	TRUE	OID42792	NA	batch_2	NA	TRUE	FALSE
FNTA	P49354	ENSG00000168522	farnesyltransferase, CAAX box, subunit alpha [Source:HGNC Symbol;Acc:HGNC:3782]	TRUE	OID43726	NA	batch_2	NA	TRUE	FALSE
HJV	Q6ZVN8	ENSG00000168509	hemojuvelin BMP co-receptor [Source:HGNC Symbol;Acc:HGNC:4887]	TRUE	OID43803	NA	batch_2	NA	TRUE	FALSE
MTCL1	Q9Y4B5	ENSG00000168502	microtubule crosslinking factor 1 [Source:HGNC Symbol;Acc:HGNC:29121]	TRUE	OID41494	NA	batch_2	NA	TRUE	FALSE
FEN1	P39748	ENSG00000168496	flap structure-specific endonuclease 1 [Source:HGNC Symbol;Acc:HGNC:3650]	TRUE	OID42454	NA	batch_2	NA	TRUE	FALSE
POLR3D	P05423	ENSG00000168495	RNA polymerase III subunit D [Source:HGNC Symbol;Acc:HGNC:1080]	TRUE	OID41643	NA	batch_2	NA	TRUE	FALSE
TNXB	P22105	ENSG00000168477	tenascin XB [Source:HGNC Symbol;Acc:HGNC:11976]	TRUE	OID45288	NA	batch_2	NA	TRUE	TRUE
REEP4	Q9H6H4	ENSG00000168476	receptor accessory protein 4 [Source:HGNC Symbol;Acc:HGNC:26176]	TRUE	OID44177	NA	batch_2	NA	TRUE	TRUE
STIP1	P31948	ENSG00000168439	stress induced phosphoprotein 1 [Source:HGNC Symbol;Acc:HGNC:11387]	TRUE	OID45271	NA	batch_2	NA	TRUE	TRUE
COG7	P83436	ENSG00000168434	component of oligomeric golgi complex 7 [Source:HGNC Symbol;Acc:HGNC:18622]	TRUE	OID41044	NA	batch_2	NA	TRUE	FALSE
TAP1	Q03518	ENSG00000168394	transporter 1, ATP binding cassette subfamily B member [Source:HGNC Symbol;Acc:HGNC:43]	TRUE	OID43158	NA	batch_2	NA	TRUE	TRUE
DTYMK	P23919	ENSG00000168393	deoxythymidylate kinase [Source:HGNC Symbol;Acc:HGNC:3061]	TRUE	OID44614	NA	batch_2	NA	TRUE	TRUE
INSM2	Q96T92	ENSG00000168348	INSM transcriptional repressor 2 [Source:HGNC Symbol;Acc:HGNC:17539]	TRUE	OID41330	NA	batch_2	NA	TRUE	FALSE
BMI1	P35226	ENSG00000168283	BMI1 proto-oncogene, polycomb ring finger [Source:HGNC Symbol;Acc:HGNC:1066]	TRUE	OID40062	NA	batch_2	NA	TRUE	FALSE
MGAT2	Q10469	ENSG00000168282	alpha-1,6-mannosyl-glycoprotein 2-beta-N-acetylglucosaminyltransferase [Source:HGNC Symbol;Acc:HGNC:7045]	TRUE	OID44780	NA	batch_2	NA	TRUE	TRUE
KIF5C	O60282	ENSG00000168280	kinesin family member 5C [Source:HGNC Symbol;Acc:HGNC:6325]	TRUE	OID41382	NA	batch_2	NA	TRUE	FALSE
IRF2BP2	Q7Z5L9	ENSG00000168264	interferon regulatory factor 2 binding protein 2 [Source:HGNC Symbol;Acc:HGNC:21729]	TRUE	OID41343	NA	batch_2	NA	TRUE	FALSE
DNAJC7	Q99615	ENSG00000168259	DnaJ heat shock protein family (Hsp40) member C7 [Source:HGNC Symbol;Acc:HGNC:12392]	TRUE	OID44608	NA	batch_2	NA	TRUE	TRUE
UBTD2	Q8WUN7	ENSG00000168246	ubiquitin domain containing 2 [Source:HGNC Symbol;Acc:HGNC:24463]	TRUE	OID43263	NA	batch_2	NA	TRUE	FALSE
FAM83B	Q5T0W9	ENSG00000168143	family with sequence similarity 83 member B [Source:HGNC Symbol;Acc:HGNC:21357]	TRUE	OID41196	NA	batch_2	NA	TRUE	FALSE
VASN	Q6EMK4	ENSG00000168140	vasorin [Source:HGNC Symbol;Acc:HGNC:18517]	TRUE	OID45429	OID20345	batch_1+2	MedianCentering	TRUE	TRUE
SETD5	Q9C0A6	ENSG00000168137	SET domain containing 5 [Source:HGNC Symbol;Acc:HGNC:25566]	TRUE	OID41788	NA	batch_2	NA	TRUE	FALSE
ANKS3	Q6ZW76	ENSG00000168096	ankyrin repeat and sterile alpha motif domain containing 3 [Source:HGNC Symbol;Acc:HGNC:29422]	TRUE	OID40802	NA	batch_2	NA	TRUE	FALSE
SCARA5	Q6ZMJ2	ENSG00000168079	scavenger receptor class A member 5 [Source:HGNC Symbol;Acc:HGNC:28701]	TRUE	OID44907	NA	batch_2	NA	TRUE	TRUE
PBK	Q96KB5	ENSG00000168078	PDZ binding kinase [Source:HGNC Symbol;Acc:HGNC:18282]	TRUE	OID41591	NA	batch_2	NA	TRUE	FALSE
CCDC88B	A6NC98	ENSG00000168071	coiled-coil domain containing 88B [Source:HGNC Symbol;Acc:HGNC:26757]	TRUE	OID40957	NA	batch_2	NA	TRUE	FALSE
LTBP3	Q9NS15	ENSG00000168056	latent transforming growth factor beta binding protein 3 [Source:HGNC Symbol;Acc:HGNC:6716]	TRUE	OID42713	NA	batch_2	NA	TRUE	TRUE
FADD	Q13158	ENSG00000168040	Fas associated via death domain [Source:HGNC Symbol;Acc:HGNC:3573]	TRUE	OID44645	OID20151	batch_1+2	MedianCentering	TRUE	TRUE
ULK4	Q96C45	ENSG00000168038	unc-51 like kinase 4 [Source:HGNC Symbol;Acc:HGNC:15784]	TRUE	OID41995	NA	batch_2	NA	TRUE	FALSE
ENTPD3	O75355	ENSG00000168032	ectonucleoside triphosphate diphosphohydrolase 3 [Source:HGNC Symbol;Acc:HGNC:3365]	TRUE	OID41161	NA	batch_2	NA	TRUE	FALSE
TTC21A	Q8NDW8	ENSG00000168026	tetratricopeptide repeat domain 21A [Source:HGNC Symbol;Acc:HGNC:30761]	TRUE	OID41972	NA	batch_2	NA	TRUE	FALSE
PLAAT5	Q96KN8	ENSG00000168004	phospholipase A and acyltransferase 5 [Source:HGNC Symbol;Acc:HGNC:24978]	TRUE	OID42913	NA	batch_2	NA	TRUE	FALSE
RAB3IL1	Q8TBN0	ENSG00000167994	RAB3A interacting protein like 1 [Source:HGNC Symbol;Acc:HGNC:9780]	TRUE	OID44160	NA	batch_2	NA	TRUE	FALSE
KCTD5	Q9NXV2	ENSG00000167977	potassium channel tetramerization domain containing 5 [Source:HGNC Symbol;Acc:HGNC:21423]	TRUE	OID43887	NA	batch_2	NA	TRUE	FALSE
CASKIN1	Q8WXD9	ENSG00000167971	CASK interacting protein 1 [Source:HGNC Symbol;Acc:HGNC:20879]	TRUE	OID40088	NA	batch_2	NA	TRUE	FALSE
ECI1	P42126	ENSG00000167969	enoyl-CoA delta isomerase 1 [Source:HGNC Symbol;Acc:HGNC:2703]	TRUE	OID45112	NA	batch_2	NA	TRUE	TRUE
SOST	Q9BQB4	ENSG00000167941	sclerostin [Source:HGNC Symbol;Acc:HGNC:13771]	TRUE	OID44948	OID20204	batch_1+2	QuantileSmoothing	TRUE	TRUE
GSDMA	Q96QA5	ENSG00000167914	gasdermin A [Source:HGNC Symbol;Acc:HGNC:13311]	TRUE	OID41268	NA	batch_2	NA	TRUE	FALSE
TK1	P04183	ENSG00000167900	thymidine kinase 1 [Source:HGNC Symbol;Acc:HGNC:11830]	TRUE	OID43193	NA	batch_2	NA	TRUE	FALSE
EVPL	Q92817	ENSG00000167880	envoplakin [Source:HGNC Symbol;Acc:HGNC:3503]	TRUE	OID42432	NA	batch_2	NA	TRUE	FALSE
ATP5PD	O75947	ENSG00000167863	ATP synthase peripheral stalk subunit d [Source:HGNC Symbol;Acc:HGNC:845]	TRUE	OID42160	NA	batch_2	NA	TRUE	TRUE
MRPL58	Q14197	ENSG00000167862	mitochondrial ribosomal protein L58 [Source:HGNC Symbol;Acc:HGNC:5359]	TRUE	OID43989	NA	batch_2	NA	TRUE	TRUE
HID1	Q8IV36	ENSG00000167861	HID1 domain containing [Source:HGNC Symbol;Acc:HGNC:15736]	TRUE	OID41292	NA	batch_2	NA	TRUE	TRUE
TEKT1	Q969V4	ENSG00000167858	tektin 1 [Source:HGNC Symbol;Acc:HGNC:15534]	TRUE	OID41925	NA	batch_2	NA	TRUE	FALSE
CD300A	Q9UGN4	ENSG00000167851	CD300a molecule [Source:HGNC Symbol;Acc:HGNC:19319]	TRUE	OID44510	NA	batch_2	NA	TRUE	TRUE
CD300C	Q08708	ENSG00000167850	CD300c molecule [Source:HGNC Symbol;Acc:HGNC:19320]	TRUE	OID44511	NA	batch_2	NA	TRUE	TRUE
PRDX2	P32119	ENSG00000167815	peroxiredoxin 2 [Source:HGNC Symbol;Acc:HGNC:9353]	TRUE	OID45400	NA	batch_2	NA	TRUE	TRUE
CDK2AP2	O75956	ENSG00000167797	cyclin dependent kinase 2 associated protein 2 [Source:HGNC Symbol;Acc:HGNC:30833]	TRUE	OID40979	NA	batch_2	NA	TRUE	FALSE
CABP2	Q9NPB3	ENSG00000167791	calcium binding protein 2 [Source:HGNC Symbol;Acc:HGNC:1385]	TRUE	OID42209	NA	batch_2	NA	TRUE	FALSE
IGFBP6	P24592	ENSG00000167779	insulin like growth factor binding protein 6 [Source:HGNC Symbol;Acc:HGNC:5475]	TRUE	OID45374	OID20413	batch_1+2	QuantileSmoothing	TRUE	TRUE
ANGPTL4	Q9BY76	ENSG00000167772	angiopoietin like 4 [Source:HGNC Symbol;Acc:HGNC:16039]	TRUE	OID44462	OID20703	batch_1+2	MedianCentering	TRUE	TRUE
OTUB1	Q96FW1	ENSG00000167770	OTU deubiquitinase, ubiquitin aldehyde binding 1 [Source:HGNC Symbol;Acc:HGNC:23077]	TRUE	OID41576	NA	batch_2	NA	TRUE	FALSE
KLK13	Q9UKR3	ENSG00000167759	kallikrein related peptidase 13 [Source:HGNC Symbol;Acc:HGNC:6361]	TRUE	OID43896	NA	batch_2	NA	TRUE	TRUE
KLK6	Q92876	ENSG00000167755	kallikrein related peptidase 6 [Source:HGNC Symbol;Acc:HGNC:6367]	TRUE	OID44732	NA	batch_2	NA	TRUE	TRUE
KLK4	Q9Y5K2	ENSG00000167749	kallikrein related peptidase 4 [Source:HGNC Symbol;Acc:HGNC:6365]	TRUE	OID43899	NA	batch_2	NA	TRUE	TRUE
KLK1	P06870	ENSG00000167748	kallikrein 1 [Source:HGNC Symbol;Acc:HGNC:6357]	TRUE	OID44729	NA	batch_2	NA	TRUE	TRUE
TRPV3	Q8NET8	ENSG00000167723	transient receptor potential cation channel subfamily V member 3 [Source:HGNC Symbol;Acc:HGNC:18084]	TRUE	OID43242	NA	batch_2	NA	TRUE	FALSE
SERPINF2	P08697	ENSG00000167711	serpin family F member 2 [Source:HGNC Symbol;Acc:HGNC:9075]	TRUE	OID45498	NA	batch_2	NA	TRUE	TRUE
RILP	Q96NA2	ENSG00000167705	Rab interacting lysosomal protein [Source:HGNC Symbol;Acc:HGNC:30266]	TRUE	OID44184	NA	batch_2	NA	TRUE	FALSE
KIFC2	Q96AC6	ENSG00000167702	kinesin family member C2 [Source:HGNC Symbol;Acc:HGNC:29530]	TRUE	OID40346	NA	batch_2	NA	TRUE	FALSE
GLOD4	Q9HC38	ENSG00000167699	glyoxalase domain containing 4 [Source:HGNC Symbol;Acc:HGNC:14111]	TRUE	OID44684	OID20710	batch_1+2	MedianCentering	TRUE	TRUE
SEMA6B	Q9H3T3	ENSG00000167680	semaphorin 6B [Source:HGNC Symbol;Acc:HGNC:10739]	TRUE	OID41778	NA	batch_2	NA	TRUE	FALSE
HDGFL2	Q7Z4V5	ENSG00000167674	HDGF like 2 [Source:HGNC Symbol;Acc:HGNC:14680]	TRUE	OID43797	NA	batch_2	NA	TRUE	TRUE
UBXN6	Q9BZV1	ENSG00000167671	UBX domain protein 6 [Source:HGNC Symbol;Acc:HGNC:14928]	TRUE	OID41992	NA	batch_2	NA	TRUE	FALSE
LY6D	Q14210	ENSG00000167656	lymphocyte antigen 6 family member D [Source:HGNC Symbol;Acc:HGNC:13348]	TRUE	OID44761	OID20708	batch_1+2	QuantileSmoothing	TRUE	TRUE
PSCA	O43653	ENSG00000167653	prostate stem cell antigen [Source:HGNC Symbol;Acc:HGNC:9500]	TRUE	OID44132	NA	batch_2	NA	TRUE	TRUE
SPINT2	O43291	ENSG00000167642	serine peptidase inhibitor, Kunitz type 2 [Source:HGNC Symbol;Acc:HGNC:11247]	TRUE	OID44955	OID20720	batch_1+2	QuantileSmoothing	TRUE	TRUE
PPP1R14A	Q96A00	ENSG00000167641	protein phosphatase 1 regulatory inhibitor subunit 14A [Source:HGNC Symbol;Acc:HGNC:14871]	TRUE	OID44116	NA	batch_2	NA	TRUE	FALSE
KIR3DL1	P43629	ENSG00000167633	killer cell immunoglobulin like receptor, three Ig domains and long cytoplasmic tail 1 [Source:HGNC Symbol;Acc:HGNC:6338]	TRUE	OID42672	NA	batch_2	NA	TRUE	TRUE
LAIR2	Q6ISS4	ENSG00000167618	leukocyte associated immunoglobulin like receptor 2 [Source:HGNC Symbol;Acc:HGNC:6478]	TRUE	OID43909	NA	batch_2	NA	TRUE	TRUE
LENG8	Q96PV6	ENSG00000167615	leukocyte receptor cluster member 8 [Source:HGNC Symbol;Acc:HGNC:15500]	TRUE	OID41411	NA	batch_2	NA	TRUE	TRUE
LAIR1	Q6GTX8	ENSG00000167613	leukocyte associated immunoglobulin like receptor 1 [Source:HGNC Symbol;Acc:HGNC:6477]	TRUE	OID44739	OID20737	batch_1+2	QuantileSmoothing	TRUE	TRUE
AXL	P30530	ENSG00000167601	AXL receptor tyrosine kinase [Source:HGNC Symbol;Acc:HGNC:905]	TRUE	OID45316	OID20363	batch_1+2	MedianCentering	TRUE	TRUE
PROSER3	Q2NL68	ENSG00000167595	proline and serine rich 3 [Source:HGNC Symbol;Acc:HGNC:25204]	TRUE	OID40524	NA	batch_2	NA	TRUE	FALSE
GPD1	P21695	ENSG00000167588	glycerol-3-phosphate dehydrogenase 1 [Source:HGNC Symbol;Acc:HGNC:4455]	TRUE	OID43775	NA	batch_2	NA	TRUE	TRUE
NCKAP5L	Q9HCH0	ENSG00000167566	NCK associated protein 5 like [Source:HGNC Symbol;Acc:HGNC:29321]	TRUE	OID41528	NA	batch_2	NA	TRUE	FALSE
TUBA1C	Q9BQE3	ENSG00000167553	tubulin alpha 1c [Source:HGNC Symbol;Acc:HGNC:20768]	TRUE	OID41975	NA	batch_2	NA	TRUE	FALSE
CORO6	Q6QEF8	ENSG00000167549	coronin 6 [Source:HGNC Symbol;Acc:HGNC:21356]	TRUE	OID42315	NA	batch_2	NA	TRUE	TRUE
CACNB3	P54284	ENSG00000167535	calcium voltage-gated channel auxiliary subunit beta 3 [Source:HGNC Symbol;Acc:HGNC:1403]	TRUE	OID43441	NA	batch_2	NA	TRUE	FALSE
SPATA33	Q96N06	ENSG00000167523	spermatogenesis associated 33 [Source:HGNC Symbol;Acc:HGNC:26463]	TRUE	OID40617	NA	batch_2	NA	TRUE	FALSE
ANKRD11	Q6UB99	ENSG00000167522	ankyrin repeat domain containing 11 [Source:HGNC Symbol;Acc:HGNC:21316]	TRUE	OID42118	NA	batch_2	NA	TRUE	FALSE
MIDN	Q504T8	ENSG00000167470	midnolin [Source:HGNC Symbol;Acc:HGNC:16298]	TRUE	OID41476	NA	batch_2	NA	TRUE	FALSE
GPX4	P36969	ENSG00000167468	glutathione peroxidase 4 [Source:HGNC Symbol;Acc:HGNC:4556]	TRUE	OID42532	NA	batch_2	NA	TRUE	TRUE
CA4	P22748	ENSG00000167434	carbonic anhydrase 4 [Source:HGNC Symbol;Acc:HGNC:1375]	TRUE	OID45048	OID20241	batch_1+2	MedianCentering	TRUE	TRUE
LPO	P22079	ENSG00000167419	lactoperoxidase [Source:HGNC Symbol;Acc:HGNC:6678]	TRUE	OID43931	NA	batch_2	NA	TRUE	FALSE
IRGQ	Q8WZA9	ENSG00000167378	immunity related GTPase Q [Source:HGNC Symbol;Acc:HGNC:24868]	TRUE	OID41345	NA	batch_2	NA	TRUE	FALSE
PRRT2	Q7Z6L0	ENSG00000167371	proline rich transmembrane protein 2 [Source:HGNC Symbol;Acc:HGNC:30500]	TRUE	OID40531	NA	batch_2	NA	TRUE	TRUE
ART5	Q96L15	ENSG00000167311	ADP-ribosyltransferase 5 [Source:HGNC Symbol;Acc:HGNC:24049]	TRUE	OID42146	NA	batch_2	NA	TRUE	FALSE
MYO5B	Q9ULV0	ENSG00000167306	myosin VB [Source:HGNC Symbol;Acc:HGNC:7603]	TRUE	OID41512	NA	batch_2	NA	TRUE	FALSE
TEPSIN	Q96N21	ENSG00000167302	TEPSIN adaptor related protein complex 4 accessory protein [Source:HGNC Symbol;Acc:HGNC:26458]	TRUE	OID40654	NA	batch_2	NA	TRUE	FALSE
CD3D	P04234	ENSG00000167286	CD3 delta subunit of T-cell receptor complex [Source:HGNC Symbol;Acc:HGNC:1673]	TRUE	OID42242	NA	batch_2	NA	TRUE	FALSE
RBFOX3	A6NFN3	ENSG00000167281	RNA binding fox-1 homolog 3 [Source:HGNC Symbol;Acc:HGNC:27097]	TRUE	OID42995	NA	batch_2	NA	TRUE	TRUE
DUS2	Q9NX74	ENSG00000167264	dihydrouridine synthase 2 [Source:HGNC Symbol;Acc:HGNC:26014]	TRUE	OID40180	NA	batch_2	NA	TRUE	TRUE
DPEP2	Q9H4A9	ENSG00000167261	dipeptidase 2 [Source:HGNC Symbol;Acc:HGNC:23028]	TRUE	OID43631	NA	batch_2	NA	TRUE	TRUE
CDK12	Q9NYV4	ENSG00000167258	cyclin dependent kinase 12 [Source:HGNC Symbol;Acc:HGNC:24224]	TRUE	OID40975	NA	batch_2	NA	TRUE	FALSE
RNF214	Q8ND24	ENSG00000167257	ring finger protein 214 [Source:HGNC Symbol;Acc:HGNC:25335]	TRUE	OID41735	NA	batch_2	NA	TRUE	FALSE
FBXO22	Q8NEZ5	ENSG00000167196	F-box protein 22 [Source:HGNC Symbol;Acc:HGNC:13593]	TRUE	OID41204	NA	batch_2	NA	TRUE	FALSE
COQ7	Q99807	ENSG00000167186	coenzyme Q7, hydroxylase [Source:HGNC Symbol;Acc:HGNC:2244]	TRUE	OID43558	NA	batch_2	NA	TRUE	TRUE
PRR15L	Q9BU68	ENSG00000167183	proline rich 15 like [Source:HGNC Symbol;Acc:HGNC:28149]	TRUE	OID41670	NA	batch_2	NA	TRUE	FALSE
ISLR2	Q6UXK2	ENSG00000167178	immunoglobulin superfamily containing leucine rich repeat 2 [Source:HGNC Symbol;Acc:HGNC:29286]	TRUE	OID43872	NA	batch_2	NA	TRUE	TRUE
SLC27A4	Q6P1M0	ENSG00000167114	solute carrier family 27 member 4 [Source:HGNC Symbol;Acc:HGNC:10998]	TRUE	OID43091	NA	batch_2	NA	TRUE	FALSE
GOLGA2	Q08379	ENSG00000167110	golgin A2 [Source:HGNC Symbol;Acc:HGNC:4425]	TRUE	OID41252	NA	batch_2	NA	TRUE	TRUE
EEIG1	Q5T9C2	ENSG00000167106	estrogen-induced osteoclastogenesis regulator 1 [Source:HGNC Symbol;Acc:HGNC:31419]	TRUE	OID41180	NA	batch_2	NA	TRUE	TRUE
SAMD14	Q8IZD0	ENSG00000167100	sterile alpha motif domain containing 14 [Source:HGNC Symbol;Acc:HGNC:27312]	TRUE	OID43044	NA	batch_2	NA	TRUE	FALSE
TTC16	Q8NEE8	ENSG00000167094	tetratricopeptide repeat domain 16 [Source:HGNC Symbol;Acc:HGNC:26536]	TRUE	OID41971	NA	batch_2	NA	TRUE	FALSE
TEF	Q10587	ENSG00000167074	TEF transcription factor, PAR bZIP family member [Source:HGNC Symbol;Acc:HGNC:11722]	TRUE	OID43172	NA	batch_2	NA	TRUE	FALSE
PDIA3	P30101	ENSG00000167004	protein disulfide isomerase family A member 3 [Source:HGNC Symbol;Acc:HGNC:4606]	TRUE	OID44842	NA	batch_2	NA	TRUE	TRUE
CNPY4	Q8N129	ENSG00000166997	canopy FGF signaling regulator 4 [Source:HGNC Symbol;Acc:HGNC:28631]	TRUE	OID43547	NA	batch_2	NA	TRUE	TRUE
MARS1	P56192	ENSG00000166986	methionyl-tRNA synthetase 1 [Source:HGNC Symbol;Acc:HGNC:6898]	TRUE	OID44431	NA	batch_2	NA	TRUE	FALSE
EVA1C	P58658	ENSG00000166979	eva-1 homolog C [Source:HGNC Symbol;Acc:HGNC:13239]	TRUE	OID43692	NA	batch_2	NA	TRUE	TRUE
SMAD3	P84022	ENSG00000166949	SMAD family member 3 [Source:HGNC Symbol;Acc:HGNC:6769]	TRUE	OID44259	NA	batch_2	NA	TRUE	FALSE
DIS3L	Q8TF46	ENSG00000166938	DIS3 like exosome 3'-5' exoribonuclease [Source:HGNC Symbol;Acc:HGNC:28698]	TRUE	OID41102	NA	batch_2	NA	TRUE	TRUE
NYAP1	Q6ZVC0	ENSG00000166924	neuronal tyrosine phosphorylated phosphoinositide-3-kinase adaptor 1 [Source:HGNC Symbol;Acc:HGNC:22009]	TRUE	OID40478	NA	batch_2	NA	TRUE	FALSE
STX3	Q13277	ENSG00000166900	syntaxin 3 [Source:HGNC Symbol;Acc:HGNC:11438]	TRUE	OID44291	NA	batch_2	NA	TRUE	TRUE
ELFN2	Q5R3F8	ENSG00000166897	extracellular leucine rich repeat and fibronectin type III domain containing 2 [Source:HGNC Symbol;Acc:HGNC:29396]	TRUE	OID42405	NA	batch_2	NA	TRUE	FALSE
CLPX	O76031	ENSG00000166855	caseinolytic mitochondrial matrix peptidase chaperone subunit X [Source:HGNC Symbol;Acc:HGNC:2088]	TRUE	OID41031	NA	batch_2	NA	TRUE	FALSE
TERF2IP	Q9NYB0	ENSG00000166848	TERF2 interacting protein [Source:HGNC Symbol;Acc:HGNC:19246]	TRUE	OID43175	NA	batch_2	NA	TRUE	FALSE
NAV2	Q8IVL1	ENSG00000166833	neuron navigator 2 [Source:HGNC Symbol;Acc:HGNC:15997]	TRUE	OID41523	NA	batch_2	NA	TRUE	FALSE
RBPMS2	Q6ZRY4	ENSG00000166831	RNA binding protein, mRNA processing factor 2 [Source:HGNC Symbol;Acc:HGNC:19098]	TRUE	OID44175	NA	batch_2	NA	TRUE	TRUE
ANPEP	P15144	ENSG00000166825	alanyl aminopeptidase, membrane [Source:HGNC Symbol;Acc:HGNC:500]	TRUE	OID45307	OID20350	batch_1+2	QuantileSmoothing	TRUE	TRUE
PLIN1	O60240	ENSG00000166819	perilipin 1 [Source:HGNC Symbol;Acc:HGNC:9076]	TRUE	OID42916	NA	batch_2	NA	TRUE	TRUE
KIF7	Q2M1P5	ENSG00000166813	kinesin family member 7 [Source:HGNC Symbol;Acc:HGNC:30497]	TRUE	OID41383	NA	batch_2	NA	TRUE	FALSE
PCLAF	Q15004	ENSG00000166803	PCNA clamp associated factor [Source:HGNC Symbol;Acc:HGNC:28961]	TRUE	OID40492	NA	batch_2	NA	TRUE	FALSE
CIAO2A	Q9H5X1	ENSG00000166797	cytosolic iron-sulfur assembly component 2A [Source:HGNC Symbol;Acc:HGNC:26235]	TRUE	OID41019	NA	batch_2	NA	TRUE	FALSE
PPIB	P23284	ENSG00000166794	peptidylprolyl isomerase B [Source:HGNC Symbol;Acc:HGNC:9255]	TRUE	OID45231	OID20331	batch_1+2	MedianCentering	TRUE	TRUE
BMERB1	Q96MC5	ENSG00000166780	bMERB domain containing 1 [Source:HGNC Symbol;Acc:HGNC:19213]	TRUE	OID42189	NA	batch_2	NA	TRUE	TRUE
AP1G1	O43747	ENSG00000166747	adaptor related protein complex 1 subunit gamma 1 [Source:HGNC Symbol;Acc:HGNC:555]	TRUE	OID42128	NA	batch_2	NA	TRUE	FALSE
ACSM1	Q08AH1	ENSG00000166743	acyl-CoA synthetase medium chain family member 1 [Source:HGNC Symbol;Acc:HGNC:18049]	TRUE	OID40763	NA	batch_2	NA	TRUE	FALSE
GOLM2	Q6P4E1	ENSG00000166734	golgi membrane protein 2 [Source:HGNC Symbol;Acc:HGNC:24892]	TRUE	OID44690	NA	batch_2	NA	TRUE	TRUE
B2M	P61769	ENSG00000166710	beta-2-microglobulin [Source:HGNC Symbol;Acc:HGNC:914]	TRUE	OID45441	NA	batch_2	NA	TRUE	TRUE
ZCCHC18	P0CG32	ENSG00000166707	zinc finger CCHC-type containing 18 [Source:HGNC Symbol;Acc:HGNC:32459]	TRUE	OID42048	NA	batch_2	NA	TRUE	FALSE
TMPRSS5	Q9H3S3	ENSG00000166682	transmembrane serine protease 5 [Source:HGNC Symbol;Acc:HGNC:14908]	TRUE	OID44335	NA	batch_2	NA	TRUE	TRUE
BEX3	Q00994	ENSG00000166681	brain expressed X-linked 3 [Source:HGNC Symbol;Acc:HGNC:13388]	TRUE	OID42180	NA	batch_2	NA	TRUE	FALSE
MMP10	P09238	ENSG00000166670	matrix metallopeptidase 10 [Source:HGNC Symbol;Acc:HGNC:7156]	TRUE	OID44784	OID20687	batch_1+2	MedianCentering	TRUE	TRUE
HSP90B1	P14625	ENSG00000166598	heat shock protein 90 beta family member 1 [Source:HGNC Symbol;Acc:HGNC:12028]	TRUE	OID42577	NA	batch_2	NA	TRUE	FALSE
IQCD	Q96DY2	ENSG00000166578	IQ motif containing D [Source:HGNC Symbol;Acc:HGNC:25168]	TRUE	OID41336	NA	batch_2	NA	TRUE	FALSE
ZSCAN21	Q9Y5A6	ENSG00000166529	zinc finger and SCAN domain containing 21 [Source:HGNC Symbol;Acc:HGNC:13104]	TRUE	OID42077	NA	batch_2	NA	TRUE	FALSE
CLEC4D	Q8WXI8	ENSG00000166527	C-type lectin domain family 4 member D [Source:HGNC Symbol;Acc:HGNC:14554]	TRUE	OID43536	OID20609	batch_1+2	QuantileSmoothing	TRUE	TRUE
CLEC4E	Q9ULY5	ENSG00000166523	C-type lectin domain family 4 member E [Source:HGNC Symbol;Acc:HGNC:14555]	TRUE	OID41025	NA	batch_2	NA	TRUE	FALSE
MFAP4	P55083	ENSG00000166482	microfibril associated protein 4 [Source:HGNC Symbol;Acc:HGNC:7035]	TRUE	OID44779	NA	batch_2	NA	TRUE	TRUE
LEO1	Q8WVC0	ENSG00000166477	LEO1 homolog, Paf1/RNA polymerase II complex component [Source:HGNC Symbol;Acc:HGNC:30401]	TRUE	OID42692	NA	batch_2	NA	TRUE	FALSE
PRTG	Q2VWP7	ENSG00000166450	protogenin [Source:HGNC Symbol;Acc:HGNC:26373]	TRUE	OID44130	NA	batch_2	NA	TRUE	TRUE
DENND2B	P78524	ENSG00000166444	DENN domain containing 2B [Source:HGNC Symbol;Acc:HGNC:11350]	TRUE	OID42369	NA	batch_2	NA	TRUE	FALSE
RNF169	Q8NCN4	ENSG00000166439	ring finger protein 169 [Source:HGNC Symbol;Acc:HGNC:26961]	TRUE	OID43016	NA	batch_2	NA	TRUE	FALSE
XRRA1	Q6P2D8	ENSG00000166435	X-ray radiation resistance associated 1 [Source:HGNC Symbol;Acc:HGNC:18868]	TRUE	OID40720	NA	batch_2	NA	TRUE	FALSE
SERPINB8	P50452	ENSG00000166401	serpin family B member 8 [Source:HGNC Symbol;Acc:HGNC:8952]	TRUE	OID44231	OID20630	batch_1+2	MedianCentering	TRUE	TRUE
GARRE1	O15063	ENSG00000166398	granule associated Rac and RHOG effector 1 [Source:HGNC Symbol;Acc:HGNC:29016]	TRUE	OID41233	NA	batch_2	NA	TRUE	TRUE
CYB5R2	Q6BCY4	ENSG00000166394	cytochrome b5 reductase 2 [Source:HGNC Symbol;Acc:HGNC:24376]	TRUE	OID43587	NA	batch_2	NA	TRUE	TRUE
PPFIBP2	Q8ND30	ENSG00000166387	PPFIA binding protein 2 [Source:HGNC Symbol;Acc:HGNC:9250]	TRUE	OID41653	NA	batch_2	NA	TRUE	FALSE
IFTAP	Q86VG3	ENSG00000166352	intraflagellar transport associated protein [Source:HGNC Symbol;Acc:HGNC:25142]	TRUE	OID41321	NA	batch_2	NA	TRUE	FALSE
CYB5A	P00167	ENSG00000166347	cytochrome b5 type A [Source:HGNC Symbol;Acc:HGNC:2570]	TRUE	OID42343	NA	batch_2	NA	TRUE	TRUE
TPP1	O14773	ENSG00000166340	tripeptidyl peptidase 1 [Source:HGNC Symbol;Acc:HGNC:2073]	TRUE	OID44998	OID20750	batch_1+2	MedianCentering	TRUE	TRUE
APBB1	O00213	ENSG00000166313	amyloid beta precursor protein binding family B member 1 [Source:HGNC Symbol;Acc:HGNC:581]	TRUE	OID40022	NA	batch_2	NA	TRUE	FALSE
SMPD1	P17405	ENSG00000166311	sphingomyelin phosphodiesterase 1 [Source:HGNC Symbol;Acc:HGNC:11120]	TRUE	OID44940	NA	batch_2	NA	TRUE	TRUE
PLEKHF1	Q96S99	ENSG00000166289	pleckstrin homology and FYVE domain containing 1 [Source:HGNC Symbol;Acc:HGNC:20764]	TRUE	OID41626	NA	batch_2	NA	TRUE	FALSE
C2	P06681	ENSG00000166278	complement C2 [Source:HGNC Symbol;Acc:HGNC:1248]	TRUE	OID45320	OID20410	batch_1+2	QuantileSmoothing	TRUE	TRUE
STXBP4	Q6ZWJ1	ENSG00000166263	syntaxin binding protein 4 [Source:HGNC Symbol;Acc:HGNC:19694]	TRUE	OID40641	NA	batch_2	NA	TRUE	FALSE
FAM227B	Q96M60	ENSG00000166262	family with sequence similarity 227 member B [Source:HGNC Symbol;Acc:HGNC:26543]	TRUE	OID41193	NA	batch_2	NA	TRUE	FALSE
ZNF202	O95125	ENSG00000166261	zinc finger protein 202 [Source:HGNC Symbol;Acc:HGNC:12994]	TRUE	OID42058	NA	batch_2	NA	TRUE	FALSE
SCN3B	Q9NY72	ENSG00000166257	sodium voltage-gated channel beta subunit 3 [Source:HGNC Symbol;Acc:HGNC:20665]	TRUE	OID43058	NA	batch_2	NA	TRUE	FALSE
CLMP	Q9H6B4	ENSG00000166250	CXADR like membrane protein [Source:HGNC Symbol;Acc:HGNC:24039]	TRUE	OID43540	NA	batch_2	NA	TRUE	FALSE
DNAAF8	Q8IYS4	ENSG00000166246	dynein axonemal assembly factor 8 [Source:HGNC Symbol;Acc:HGNC:25081]	TRUE	OID41106	NA	batch_2	NA	TRUE	FALSE
PCBD1	P61457	ENSG00000166228	pterin-4 alpha-carbinolamine dehydratase 1 [Source:HGNC Symbol;Acc:HGNC:8646]	TRUE	OID44832	NA	batch_2	NA	TRUE	TRUE
SENP8	Q96LD8	ENSG00000166192	SUMO peptidase family member, NEDD8 specific [Source:HGNC Symbol;Acc:HGNC:22992]	TRUE	OID41780	NA	batch_2	NA	TRUE	FALSE
ASPG	Q86U10	ENSG00000166183	asparaginase [Source:HGNC Symbol;Acc:HGNC:20123]	TRUE	OID42149	NA	batch_2	NA	TRUE	FALSE
BAG5	Q9UL15	ENSG00000166170	BAG cochaperone 5 [Source:HGNC Symbol;Acc:HGNC:941]	TRUE	OID43404	NA	batch_2	NA	TRUE	FALSE
CKB	P12277	ENSG00000166165	creatine kinase B [Source:HGNC Symbol;Acc:HGNC:1991]	TRUE	OID45073	NA	batch_2	NA	TRUE	TRUE
LRTM2	Q8N967	ENSG00000166159	leucine rich repeats and transmembrane domains 2 [Source:HGNC Symbol;Acc:HGNC:32443]	TRUE	OID43938	NA	batch_2	NA	TRUE	FALSE
C16orf78	Q8WTQ4	ENSG00000166152	chromosome 16 open reading frame 78 [Source:HGNC Symbol;Acc:HGNC:28479]	TRUE	OID40884	NA	batch_2	NA	TRUE	TRUE
SPINT1	O43278	ENSG00000166145	serine peptidase inhibitor, Kunitz type 1 [Source:HGNC Symbol;Acc:HGNC:11246]	TRUE	OID45266	NA	batch_2	NA	TRUE	FALSE
PPP1R14D	Q9NXH3	ENSG00000166143	protein phosphatase 1 regulatory inhibitor subunit 14D [Source:HGNC Symbol;Acc:HGNC:14953]	TRUE	OID44117	NA	batch_2	NA	TRUE	TRUE
ZFYVE19	Q96K21	ENSG00000166140	zinc finger FYVE-type containing 19 [Source:HGNC Symbol;Acc:HGNC:20758]	TRUE	OID44426	NA	batch_2	NA	TRUE	TRUE
AMN	Q9BXJ7	ENSG00000166126	amnion associated transmembrane protein [Source:HGNC Symbol;Acc:HGNC:14604]	TRUE	OID42114	OID20492	batch_1+2	MedianCentering	TRUE	FALSE
SPATA19	Q7Z5L4	ENSG00000166118	spermatogenesis associated 19 [Source:HGNC Symbol;Acc:HGNC:30614]	TRUE	OID40615	NA	batch_2	NA	TRUE	FALSE
ADAMTS15	Q8TE58	ENSG00000166106	ADAM metallopeptidase with thrombospondin type 1 motif 15 [Source:HGNC Symbol;Acc:HGNC:16305]	TRUE	OID43332	NA	batch_2	NA	TRUE	TRUE
IL25	Q9H293	ENSG00000166090	interleukin 25 [Source:HGNC Symbol;Acc:HGNC:13765]	TRUE	OID42617	NA	batch_2	NA	TRUE	FALSE
JAM3	Q9BX67	ENSG00000166086	junctional adhesion molecule 3 [Source:HGNC Symbol;Acc:HGNC:15532]	TRUE	OID44726	NA	batch_2	NA	TRUE	FALSE
TMCO5A	Q8N6Q1	ENSG00000166069	transmembrane and coiled-coil domains 5A [Source:HGNC Symbol;Acc:HGNC:28558]	TRUE	OID43197	NA	batch_2	NA	TRUE	FALSE
PASD1	Q8IV76	ENSG00000166049	PAS domain containing repressor 1 [Source:HGNC Symbol;Acc:HGNC:20686]	TRUE	OID40489	NA	batch_2	NA	TRUE	FALSE
R3HCC1L	Q7Z5L2	ENSG00000166024	R3H domain and coiled-coil containing 1 like [Source:HGNC Symbol;Acc:HGNC:23512]	TRUE	OID41686	NA	batch_2	NA	TRUE	FALSE
NELL1	Q92832	ENSG00000165973	neural EGFL like 1 [Source:HGNC Symbol;Acc:HGNC:7750]	TRUE	OID44807	NA	batch_2	NA	TRUE	TRUE
PDZRN4	Q6ZMN7	ENSG00000165966	PDZ domain containing ring finger 4 [Source:HGNC Symbol;Acc:HGNC:30552]	TRUE	OID41606	NA	batch_2	NA	TRUE	FALSE
SMCO2	A6NFE2	ENSG00000165935	single-pass membrane protein with coiled-coil domains 2 [Source:HGNC Symbol;Acc:HGNC:34448]	TRUE	OID41820	NA	batch_2	NA	TRUE	FALSE
CPSF2	Q9P2I0	ENSG00000165934	cleavage and polyadenylation specific factor 2 [Source:HGNC Symbol;Acc:HGNC:2325]	TRUE	OID40128	NA	batch_2	NA	TRUE	FALSE
AGBL2	Q5U5Z8	ENSG00000165923	AGBL carboxypeptidase 2 [Source:HGNC Symbol;Acc:HGNC:26296]	TRUE	OID43342	NA	batch_2	NA	TRUE	FALSE
PSMC3	P17980	ENSG00000165916	proteasome 26S subunit, ATPase 3 [Source:HGNC Symbol;Acc:HGNC:9549]	TRUE	OID42959	NA	batch_2	NA	TRUE	FALSE
PACSIN3	Q9UKS6	ENSG00000165912	protein kinase C and casein kinase substrate in neurons 3 [Source:HGNC Symbol;Acc:HGNC:8572]	TRUE	OID41582	NA	batch_2	NA	TRUE	FALSE
ISCA2	Q86U28	ENSG00000165898	iron-sulfur cluster assembly 2 [Source:HGNC Symbol;Acc:HGNC:19857]	TRUE	OID41346	NA	batch_2	NA	TRUE	FALSE
ARHGAP42	A6NI28	ENSG00000165895	Rho GTPase activating protein 42 [Source:HGNC Symbol;Acc:HGNC:26545]	TRUE	OID40816	NA	batch_2	NA	TRUE	FALSE
ANKRD2	Q9GZV1	ENSG00000165887	ankyrin repeat domain 2 [Source:HGNC Symbol;Acc:HGNC:495]	TRUE	OID40795	NA	batch_2	NA	TRUE	FALSE
HSPA12A	O43301	ENSG00000165868	heat shock protein family A (Hsp70) member 12A [Source:HGNC Symbol;Acc:HGNC:19022]	TRUE	OID40296	NA	batch_2	NA	TRUE	FALSE
PRAP1	Q96NZ9	ENSG00000165828	proline rich acidic protein 1 [Source:HGNC Symbol;Acc:HGNC:23304]	TRUE	OID45234	NA	batch_2	NA	TRUE	TRUE
BTNL9	Q6UXG8	ENSG00000165810	butyrophilin like 9 [Source:HGNC Symbol;Acc:HGNC:24176]	TRUE	OID40878	NA	batch_2	NA	TRUE	FALSE
CASP7	P55210	ENSG00000165806	caspase 7 [Source:HGNC Symbol;Acc:HGNC:1508]	TRUE	OID43454	NA	batch_2	NA	TRUE	FALSE
ARHGEF40	Q8TER5	ENSG00000165801	Rho guanine nucleotide exchange factor 40 [Source:HGNC Symbol;Acc:HGNC:25516]	TRUE	OID40032	NA	batch_2	NA	TRUE	FALSE
JCAD	Q9P266	ENSG00000165757	junctional cadherin 5 associated [Source:HGNC Symbol;Acc:HGNC:29283]	TRUE	OID40324	NA	batch_2	NA	TRUE	FALSE
STK32C	Q86UX6	ENSG00000165752	serine/threonine kinase 32C [Source:HGNC Symbol;Acc:HGNC:21332]	TRUE	OID41886	NA	batch_2	NA	TRUE	TRUE
DDX21	Q9NR30	ENSG00000165732	DExD-box helicase 21 [Source:HGNC Symbol;Acc:HGNC:2744]	TRUE	OID41087	NA	batch_2	NA	TRUE	FALSE
RET	P07949	ENSG00000165731	ret proto-oncogene [Source:HGNC Symbol;Acc:HGNC:9967]	TRUE	OID44179	NA	batch_2	NA	TRUE	TRUE
TSC1	Q92574	ENSG00000165699	TSC complex subunit 1 [Source:HGNC Symbol;Acc:HGNC:12362]	TRUE	OID43243	NA	batch_2	NA	TRUE	FALSE
FRMD7	Q6ZUT3	ENSG00000165694	FERM domain containing 7 [Source:HGNC Symbol;Acc:HGNC:8079]	TRUE	OID42480	NA	batch_2	NA	TRUE	FALSE
ENTR1	Q96C92	ENSG00000165689	endosome associated trafficking regulator 1 [Source:HGNC Symbol;Acc:HGNC:10667]	TRUE	OID43679	NA	batch_2	NA	TRUE	FALSE
CLEC1B	Q9P126	ENSG00000165682	C-type lectin domain family 1 member B [Source:HGNC Symbol;Acc:HGNC:24356]	TRUE	OID44545	NA	batch_2	NA	TRUE	TRUE
PRDX3	P30048	ENSG00000165672	peroxiredoxin 3 [Source:HGNC Symbol;Acc:HGNC:9354]	TRUE	OID42938	OID20483	batch_1+2	MedianCentering	TRUE	FALSE
FAM204A	Q9H8W3	ENSG00000165669	family with sequence similarity 204 member A [Source:HGNC Symbol;Acc:HGNC:25794]	TRUE	OID41192	NA	batch_2	NA	TRUE	FALSE
QSOX2	Q6ZRP7	ENSG00000165661	quiescin sulfhydryl oxidase 2 [Source:HGNC Symbol;Acc:HGNC:30249]	TRUE	OID41684	NA	batch_2	NA	TRUE	FALSE
ABRAXAS2	Q15018	ENSG00000165660	abraxas 2, BRISC complex subunit [Source:HGNC Symbol;Acc:HGNC:28975]	TRUE	OID42081	NA	batch_2	NA	TRUE	FALSE
VSTM4	Q8IW00	ENSG00000165633	V-set and transmembrane domain containing 4 [Source:HGNC Symbol;Acc:HGNC:26470]	TRUE	OID42016	NA	batch_2	NA	TRUE	FALSE
BEND7	Q8N7W2	ENSG00000165626	BEN domain containing 7 [Source:HGNC Symbol;Acc:HGNC:23514]	TRUE	OID40861	NA	batch_2	NA	TRUE	FALSE
UCMA	Q8WVF2	ENSG00000165623	upper zone of growth plate and cartilage matrix associated [Source:HGNC Symbol;Acc:HGNC:25205]	TRUE	OID41993	NA	batch_2	NA	TRUE	FALSE
DACT1	Q9NYF0	ENSG00000165617	dishevelled binding antagonist of beta catenin 1 [Source:HGNC Symbol;Acc:HGNC:17748]	TRUE	OID41076	NA	batch_2	NA	TRUE	FALSE
NUDT5	Q9UKK9	ENSG00000165609	nudix hydrolase 5 [Source:HGNC Symbol;Acc:HGNC:8052]	TRUE	OID45205	NA	batch_2	NA	TRUE	FALSE
DRGX	A6NNA5	ENSG00000165606	dorsal root ganglia homeobox [Source:HGNC Symbol;Acc:HGNC:21536]	TRUE	OID40177	NA	batch_2	NA	TRUE	FALSE
SSX5	O60225	ENSG00000165583	SSX family member 5 [Source:HGNC Symbol;Acc:HGNC:11339]	TRUE	OID41873	NA	batch_2	NA	TRUE	FALSE
ARF6	P62330	ENSG00000165527	ARF GTPase 6 [Source:HGNC Symbol;Acc:HGNC:659]	TRUE	OID43377	NA	batch_2	NA	TRUE	TRUE
DEPP1	Q9NTK1	ENSG00000165507	DEPP autophagy regulator 1 [Source:HGNC Symbol;Acc:HGNC:23355]	TRUE	OID44601	NA	batch_2	NA	TRUE	TRUE
DNAAF2	Q9NVR5	ENSG00000165506	dynein axonemal assembly factor 2 [Source:HGNC Symbol;Acc:HGNC:20188]	TRUE	OID40163	NA	batch_2	NA	TRUE	FALSE
DDIAS	Q8IXT1	ENSG00000165490	DNA damage induced apoptosis suppressor [Source:HGNC Symbol;Acc:HGNC:26351]	TRUE	OID41084	NA	batch_2	NA	TRUE	FALSE
MBL2	P11226	ENSG00000165471	mannose binding lectin 2 [Source:HGNC Symbol;Acc:HGNC:6922]	TRUE	OID45479	NA	batch_2	NA	TRUE	TRUE
PHOX2A	O14813	ENSG00000165462	paired like homeobox 2A [Source:HGNC Symbol;Acc:HGNC:691]	TRUE	OID41616	NA	batch_2	NA	TRUE	FALSE
INPPL1	O15357	ENSG00000165458	inositol polyphosphate phosphatase like 1 [Source:HGNC Symbol;Acc:HGNC:6080]	TRUE	OID43863	NA	batch_2	NA	TRUE	TRUE
FOLR2	P14207	ENSG00000165457	folate receptor beta [Source:HGNC Symbol;Acc:HGNC:3793]	TRUE	OID44660	NA	batch_2	NA	TRUE	TRUE
SUGT1	Q9Y2Z0	ENSG00000165416	SGT1 homolog, MIS12 kinetochore complex assembly cochaperone [Source:HGNC Symbol;Acc:HGNC:16987]	TRUE	OID43146	NA	batch_2	NA	TRUE	TRUE
WRN	Q14191	ENSG00000165392	WRN RecQ like helicase [Source:HGNC Symbol;Acc:HGNC:12791]	TRUE	OID42027	NA	batch_2	NA	TRUE	FALSE
GPR101	Q96P66	ENSG00000165370	G protein-coupled receptor 101 [Source:HGNC Symbol;Acc:HGNC:14963]	TRUE	OID42530	NA	batch_2	NA	TRUE	FALSE
HECTD2	Q5U5R9	ENSG00000165338	HECT domain E3 ubiquitin protein ligase 2 [Source:HGNC Symbol;Acc:HGNC:26736]	TRUE	OID41286	NA	batch_2	NA	TRUE	TRUE
DEUP1	Q05D60	ENSG00000165325	deuterosome assembly protein 1 [Source:HGNC Symbol;Acc:HGNC:26344]	TRUE	OID40156	NA	batch_2	NA	TRUE	FALSE
ARHGAP12	Q8IWW6	ENSG00000165322	Rho GTPase activating protein 12 [Source:HGNC Symbol;Acc:HGNC:16348]	TRUE	OID42134	NA	batch_2	NA	TRUE	FALSE
OTUD1	Q5VV17	ENSG00000165312	OTU deubiquitinase 1 [Source:HGNC Symbol;Acc:HGNC:27346]	TRUE	OID42870	NA	batch_2	NA	TRUE	FALSE
ARMC3	Q5W041	ENSG00000165309	armadillo repeat containing 3 [Source:HGNC Symbol;Acc:HGNC:30964]	TRUE	OID42143	NA	batch_2	NA	TRUE	FALSE
SLITRK5	O94991	ENSG00000165300	SLIT and NTRK like family member 5 [Source:HGNC Symbol;Acc:HGNC:20295]	TRUE	OID41815	NA	batch_2	NA	TRUE	FALSE
BRWD3	Q6RI45	ENSG00000165288	bromodomain and WD repeat domain containing 3 [Source:HGNC Symbol;Acc:HGNC:17342]	TRUE	OID40871	NA	batch_2	NA	TRUE	FALSE
STOML2	Q9UJZ1	ENSG00000165283	stomatin like 2 [Source:HGNC Symbol;Acc:HGNC:14559]	TRUE	OID43139	NA	batch_2	NA	TRUE	FALSE
HDX	Q7Z353	ENSG00000165259	highly divergent homeobox [Source:HGNC Symbol;Acc:HGNC:26411]	TRUE	OID41283	NA	batch_2	NA	TRUE	FALSE
VEGFD	O43915	ENSG00000165197	vascular endothelial growth factor D [Source:HGNC Symbol;Acc:HGNC:3708]	TRUE	OID44391	OID20662	batch_1+2	QuantileSmoothing	TRUE	TRUE
ASB11	Q8WXH4	ENSG00000165192	ankyrin repeat and SOCS box containing 11 [Source:HGNC Symbol;Acc:HGNC:17186]	TRUE	OID40038	NA	batch_2	NA	TRUE	FALSE
KIAA1958	Q8N8K9	ENSG00000165185	KIAA1958 [Source:HGNC Symbol;Acc:HGNC:23427]	TRUE	OID40338	NA	batch_2	NA	TRUE	FALSE
SHOC1	Q5VXU9	ENSG00000165181	shortage in chiasmata 1 [Source:HGNC Symbol;Acc:HGNC:26535]	TRUE	OID41795	NA	batch_2	NA	TRUE	FALSE
NCF1C_NCF1	A8MVU1_P14598	ENSG00000165178, ENSG00000296524, ENSG00000158517	neutrophil cytosolic factor 1C (pseudogene) [Source:HGNC Symbol;Acc:HGNC:32523], neutrophil cytosolic factor 1 [Source:HGNC Symbol;Acc:HGNC:7660]	FALSE	OID41527	NA	batch_2	NA	TRUE	TRUE
DYNLT3	P51808	ENSG00000165169	dynein light chain Tctex-type 3 [Source:HGNC Symbol;Acc:HGNC:11694]	TRUE	OID43644	NA	batch_2	NA	TRUE	FALSE
FBP1	P09467	ENSG00000165140	fructose-bisphosphatase 1 [Source:HGNC Symbol;Acc:HGNC:3606]	TRUE	OID44649	NA	batch_2	NA	FALSE	FALSE
HNRNPK	P61978	ENSG00000165119	heterogeneous nuclear ribonucleoprotein K [Source:HGNC Symbol;Acc:HGNC:5044]	TRUE	OID41296	OID20051	batch_1+2	MedianCentering	TRUE	FALSE
KIF27	Q86VH2	ENSG00000165115	kinesin family member 27 [Source:HGNC Symbol;Acc:HGNC:18632]	TRUE	OID42665	NA	batch_2	NA	TRUE	FALSE
GKAP1	Q5VSY0	ENSG00000165113	G kinase anchoring protein 1 [Source:HGNC Symbol;Acc:HGNC:17496]	TRUE	OID40267	NA	batch_2	NA	TRUE	FALSE
RASEF	Q8IZ41	ENSG00000165105	RAS and EF-hand domain containing [Source:HGNC Symbol;Acc:HGNC:26464]	TRUE	OID40550	NA	batch_2	NA	TRUE	FALSE
ALDH1A1	P00352	ENSG00000165092	aldehyde dehydrogenase 1 family member A1 [Source:HGNC Symbol;Acc:HGNC:402]	TRUE	OID45029	NA	batch_2	NA	TRUE	TRUE
C8orf34	Q49A92	ENSG00000165084	chromosome 8 open reading frame 34 [Source:HGNC Symbol;Acc:HGNC:30905]	TRUE	OID40913	NA	batch_2	NA	TRUE	FALSE
MAMDC2	Q7Z304	ENSG00000165072	MAM domain containing 2 [Source:HGNC Symbol;Acc:HGNC:23673]	TRUE	OID44764	NA	batch_2	NA	TRUE	FALSE
FXN	Q16595	ENSG00000165060	frataxin [Source:HGNC Symbol;Acc:HGNC:3951]	TRUE	OID43733	NA	batch_2	NA	TRUE	TRUE
SYK	P43405	ENSG00000165025	spleen associated tyrosine kinase [Source:HGNC Symbol;Acc:HGNC:11491]	TRUE	OID41899	NA	batch_2	NA	TRUE	TRUE
PSIP1	O75475	ENSG00000164985	PC4 and SRSF1 interacting protein 1 [Source:HGNC Symbol;Acc:HGNC:9527]	TRUE	OID44134	OID20534	batch_1+2	QuantileSmoothing	TRUE	TRUE
NUDT2	P50583	ENSG00000164978	nudix hydrolase 2 [Source:HGNC Symbol;Acc:HGNC:8049]	TRUE	OID44050	NA	batch_2	NA	TRUE	TRUE
PDP1	Q9P0J1	ENSG00000164951	pyruvate dehydrogenase phosphatase catalytic subunit 1 [Source:HGNC Symbol;Acc:HGNC:9279]	TRUE	OID42894	NA	batch_2	NA	TRUE	FALSE
INTS8	Q75QN2	ENSG00000164941	integrator complex subunit 8 [Source:HGNC Symbol;Acc:HGNC:26048]	TRUE	OID41333	NA	batch_2	NA	TRUE	FALSE
TP53INP1	Q96A56	ENSG00000164938	tumor protein p53 inducible nuclear protein 1 [Source:HGNC Symbol;Acc:HGNC:18022]	TRUE	OID44355	OID20120	batch_1+2	MedianCentering	TRUE	TRUE
CTHRC1	Q96CG8	ENSG00000164932	collagen triple helix repeat containing 1 [Source:HGNC Symbol;Acc:HGNC:18831]	TRUE	OID45095	NA	batch_2	NA	TRUE	TRUE
CA3	P07451	ENSG00000164879	carbonic anhydrase 3 [Source:HGNC Symbol;Acc:HGNC:1374]	TRUE	OID45047	OID20271	batch_1+2	MedianCentering	TRUE	TRUE
MICALL2	Q8IY33	ENSG00000164877	MICAL like 2 [Source:HGNC Symbol;Acc:HGNC:29672]	TRUE	OID42757	NA	batch_2	NA	TRUE	TRUE
NOS3	P29474	ENSG00000164867	nitric oxide synthase 3 [Source:HGNC Symbol;Acc:HGNC:7876]	TRUE	OID42844	NA	batch_2	NA	TRUE	TRUE
DEFB1	P60022	ENSG00000164825	defensin beta 1 [Source:HGNC Symbol;Acc:HGNC:2766]	TRUE	OID45105	NA	batch_2	NA	TRUE	TRUE
EN2	P19622	ENSG00000164778	engrailed homeobox 2 [Source:HGNC Symbol;Acc:HGNC:3343]	TRUE	OID40198	NA	batch_2	NA	TRUE	FALSE
SBSPON	Q8IVN8	ENSG00000164764	somatomedin B and thrombospondin type 1 domain containing [Source:HGNC Symbol;Acc:HGNC:30362]	TRUE	OID43051	NA	batch_2	NA	TRUE	TRUE
TNFRSF11B	O00300	ENSG00000164761	TNF receptor superfamily member 11b [Source:HGNC Symbol;Acc:HGNC:11909]	TRUE	OID44986	OID20735	batch_1+2	QuantileSmoothing	TRUE	TRUE
MED30	Q96HR3	ENSG00000164758	mediator complex subunit 30 [Source:HGNC Symbol;Acc:HGNC:23032]	TRUE	OID42749	NA	batch_2	NA	TRUE	FALSE
CTSB	P07858	ENSG00000164733	cathepsin B [Source:HGNC Symbol;Acc:HGNC:2527]	TRUE	OID45099	OID20276	batch_1+2	QuantileSmoothing	TRUE	TRUE
CHMP4C	Q96CF2	ENSG00000164695	charged multivesicular body protein 4C [Source:HGNC Symbol;Acc:HGNC:30599]	TRUE	OID41014	NA	batch_2	NA	TRUE	FALSE
FNDC1	Q4ZHG4	ENSG00000164694	fibronectin type III domain containing 1 [Source:HGNC Symbol;Acc:HGNC:21184]	TRUE	OID43725	NA	batch_2	NA	TRUE	TRUE
SHH	Q15465	ENSG00000164690	sonic hedgehog signaling molecule [Source:HGNC Symbol;Acc:HGNC:10848]	TRUE	OID44243	NA	batch_2	NA	TRUE	FALSE
IQUB	Q8NA54	ENSG00000164675	IQ motif and ubiquitin domain containing [Source:HGNC Symbol;Acc:HGNC:21995]	TRUE	OID40315	NA	batch_2	NA	TRUE	FALSE
SYTL3	Q4VX76	ENSG00000164674	synaptotagmin like 3 [Source:HGNC Symbol;Acc:HGNC:15587]	TRUE	OID40646	NA	batch_2	NA	TRUE	FALSE
STEAP1	Q9UHE8	ENSG00000164647	STEAP family member 1 [Source:HGNC Symbol;Acc:HGNC:11378]	TRUE	OID40632	NA	batch_2	NA	TRUE	FALSE
KIF6	Q6ZMV9	ENSG00000164627	kinesin family member 6 [Source:HGNC Symbol;Acc:HGNC:21202]	TRUE	OID40345	NA	batch_2	NA	TRUE	TRUE
BMPER	Q8N8U9	ENSG00000164619	BMP binding endothelial regulator [Source:HGNC Symbol;Acc:HGNC:24154]	TRUE	OID44477	NA	batch_2	NA	TRUE	TRUE
CAMLG	P49069	ENSG00000164615	calcium modulating ligand [Source:HGNC Symbol;Acc:HGNC:1471]	TRUE	OID42218	NA	batch_2	NA	TRUE	FALSE
PTTG1	O95997	ENSG00000164611	PTTG1 regulator of sister chromatid separation, securin [Source:HGNC Symbol;Acc:HGNC:9690]	TRUE	OID42969	NA	batch_2	NA	TRUE	FALSE
GALNT10	Q86SR1	ENSG00000164574	polypeptide N-acetylgalactosaminyltransferase 10 [Source:HGNC Symbol;Acc:HGNC:19873]	TRUE	OID43736	NA	batch_2	NA	TRUE	TRUE
STK17A	Q9UEE5	ENSG00000164543	serine/threonine kinase 17a [Source:HGNC Symbol;Acc:HGNC:11395]	TRUE	OID41884	NA	batch_2	NA	TRUE	FALSE
PI16	Q6UXB8	ENSG00000164530	peptidase inhibitor 16 [Source:HGNC Symbol;Acc:HGNC:21245]	TRUE	OID45397	NA	batch_2	NA	TRUE	TRUE
ANKRD55	Q3KP44	ENSG00000164512	ankyrin repeat domain 55 [Source:HGNC Symbol;Acc:HGNC:25681]	TRUE	OID42122	NA	batch_2	NA	TRUE	FALSE
IL31RA	Q8NI17	ENSG00000164509	interleukin 31 receptor A [Source:HGNC Symbol;Acc:HGNC:18969]	TRUE	OID42621	NA	batch_2	NA	TRUE	FALSE
TXLNB	Q8N3L3	ENSG00000164440	taxilin beta [Source:HGNC Symbol;Acc:HGNC:21617]	TRUE	OID43257	NA	batch_2	NA	TRUE	FALSE
GRIK2	Q13002	ENSG00000164418	glutamate ionotropic receptor kainate type subunit 2 [Source:HGNC Symbol;Acc:HGNC:4580]	TRUE	OID42533	NA	batch_2	NA	TRUE	FALSE
SHROOM1	Q2M3G4	ENSG00000164403	shroom family member 1 [Source:HGNC Symbol;Acc:HGNC:24084]	TRUE	OID41798	NA	batch_2	NA	TRUE	FALSE
SEPTIN8	Q92599	ENSG00000164402	septin 8 [Source:HGNC Symbol;Acc:HGNC:16511]	TRUE	OID44227	NA	batch_2	NA	TRUE	TRUE
CSF2	P04141	ENSG00000164400	colony stimulating factor 2 [Source:HGNC Symbol;Acc:HGNC:2434]	TRUE	OID42328	NA	batch_2	NA	TRUE	TRUE
IL3	P08700	ENSG00000164399	interleukin 3 [Source:HGNC Symbol;Acc:HGNC:6011]	TRUE	OID42619	NA	batch_2	NA	TRUE	FALSE
CCDC127	Q96BQ5	ENSG00000164366	coiled-coil domain containing 127 [Source:HGNC Symbol;Acc:HGNC:30520]	TRUE	OID40934	NA	batch_2	NA	TRUE	FALSE
GFM2	Q969S9	ENSG00000164347	GTP dependent ribosome recycling factor mitochondrial 2 [Source:HGNC Symbol;Acc:HGNC:29682]	TRUE	OID41245	NA	batch_2	NA	TRUE	TRUE
KLKB1	P03952	ENSG00000164344	kallikrein B1 [Source:HGNC Symbol;Acc:HGNC:6371]	TRUE	OID45473	NA	batch_2	NA	TRUE	TRUE
TLR3	O15455	ENSG00000164342	toll like receptor 3 [Source:HGNC Symbol;Acc:HGNC:11849]	TRUE	OID44327	OID20612	batch_1+2	MedianCentering	TRUE	TRUE
ANKRA2	Q9H9E1	ENSG00000164331	ankyrin repeat family A member 2 [Source:HGNC Symbol;Acc:HGNC:13208]	TRUE	OID42117	NA	batch_2	NA	TRUE	TRUE
RICTOR	Q6R327	ENSG00000164327	RPTOR independent companion of MTOR complex 2 [Source:HGNC Symbol;Acc:HGNC:28611]	TRUE	OID43012	NA	batch_2	NA	TRUE	FALSE
CFAP97	Q9P2B7	ENSG00000164323	cilia and flagella associated protein 97 [Source:HGNC Symbol;Acc:HGNC:29276]	TRUE	OID40112	NA	batch_2	NA	TRUE	FALSE
EGFLAM	Q63HQ2	ENSG00000164318	EGF like, fibronectin type III and laminin G domains [Source:HGNC Symbol;Acc:HGNC:26810]	TRUE	OID43659	NA	batch_2	NA	TRUE	FALSE
CMYA5	Q8N3K9	ENSG00000164309	cardiomyopathy associated 5 [Source:HGNC Symbol;Acc:HGNC:14305]	TRUE	OID43545	NA	batch_2	NA	TRUE	FALSE
CASP3	P42574	ENSG00000164305	caspase 3 [Source:HGNC Symbol;Acc:HGNC:1504]	TRUE	OID45050	OID20305	batch_1+2	MedianCentering	TRUE	TRUE
CAGE1	Q8TC20	ENSG00000164304	cancer antigen 1 [Source:HGNC Symbol;Acc:HGNC:21622]	TRUE	OID40085	NA	batch_2	NA	TRUE	FALSE
ENPP6	Q6UWR7	ENSG00000164303	ectonucleotide pyrophosphatase/phosphodiesterase 6 [Source:HGNC Symbol;Acc:HGNC:23409]	TRUE	OID43676	NA	batch_2	NA	TRUE	TRUE
SPZ1	Q9BXG8	ENSG00000164299	spermatogenic leucine zipper 1 [Source:HGNC Symbol;Acc:HGNC:30721]	TRUE	OID40621	NA	batch_2	NA	TRUE	FALSE
ESM1	Q9NQ30	ENSG00000164283	endothelial cell specific molecule 1 [Source:HGNC Symbol;Acc:HGNC:3466]	TRUE	OID44637	OID20758	batch_1+2	QuantileSmoothing	TRUE	TRUE
SPINK1	P00995	ENSG00000164266	serine peptidase inhibitor Kazal type 1 [Source:HGNC Symbol;Acc:HGNC:11244]	TRUE	OID45264	NA	batch_2	NA	TRUE	TRUE
SCGB3A2	Q96PL1	ENSG00000164265	secretoglobin family 3A member 2 [Source:HGNC Symbol;Acc:HGNC:18391]	TRUE	OID44912	OID20723	batch_1+2	MedianCentering	TRUE	TRUE
PRRC1	Q96M27	ENSG00000164244	proline rich coiled-coil 1 [Source:HGNC Symbol;Acc:HGNC:28164]	TRUE	OID42954	NA	batch_2	NA	TRUE	FALSE
ADGRV1	Q8WXG9	ENSG00000164199	adhesion G protein-coupled receptor V1 [Source:HGNC Symbol;Acc:HGNC:17416]	TRUE	OID42093	NA	batch_2	NA	TRUE	FALSE
RANBP3L	Q86VV4	ENSG00000164188	RAN binding protein 3 like [Source:HGNC Symbol;Acc:HGNC:26353]	TRUE	OID40548	NA	batch_2	NA	TRUE	FALSE
NDUFAF2	Q8N183	ENSG00000164182	NADH:ubiquinone oxidoreductase complex assembly factor 2 [Source:HGNC Symbol;Acc:HGNC:28086]	TRUE	OID42814	NA	batch_2	NA	TRUE	FALSE
EDIL3	O43854	ENSG00000164176	EGF like repeats and discoidin domains 3 [Source:HGNC Symbol;Acc:HGNC:3173]	TRUE	OID43653	OID20081	batch_1+2	QuantileSmoothing	TRUE	TRUE
MOCS2	O96007	ENSG00000164172	molybdenum cofactor synthesis 2 [Source:HGNC Symbol;Acc:HGNC:7193]	TRUE	OID44790	NA	batch_2	NA	TRUE	FALSE
OTUD4	Q01804	ENSG00000164164	OTU deubiquitinase 4 [Source:HGNC Symbol;Acc:HGNC:24949]	TRUE	OID41577	NA	batch_2	NA	TRUE	FALSE
ANAPC10	Q9UM13	ENSG00000164162	anaphase promoting complex subunit 10 [Source:HGNC Symbol;Acc:HGNC:24077]	TRUE	OID40013	NA	batch_2	NA	TRUE	FALSE
ARFIP1	P53367	ENSG00000164144	ARF interacting protein 1 [Source:HGNC Symbol;Acc:HGNC:21496]	TRUE	OID43378	NA	batch_2	NA	TRUE	TRUE
IL15	P40933	ENSG00000164136	interleukin 15 [Source:HGNC Symbol;Acc:HGNC:5977]	TRUE	OID43844	OID20562	batch_1+2	MedianCentering	TRUE	TRUE
CEP44	Q9C0F1	ENSG00000164118	centrosomal protein 44 [Source:HGNC Symbol;Acc:HGNC:29356]	TRUE	OID42279	NA	batch_2	NA	TRUE	TRUE
MAP9	Q49MG5	ENSG00000164114	microtubule associated protein 9 [Source:HGNC Symbol;Acc:HGNC:26118]	TRUE	OID42737	NA	batch_2	NA	TRUE	FALSE
ANXA5	P08758	ENSG00000164111	annexin A5 [Source:HGNC Symbol;Acc:HGNC:543]	TRUE	OID42125	NA	batch_2	NA	TRUE	FALSE
SCRG1	O75711	ENSG00000164106	stimulator of chondrogenesis 1 [Source:HGNC Symbol;Acc:HGNC:17036]	TRUE	OID44913	NA	batch_2	NA	TRUE	FALSE
MST1R	Q04912	ENSG00000164078	macrophage stimulating 1 receptor [Source:HGNC Symbol;Acc:HGNC:7381]	TRUE	OID41492	NA	batch_2	NA	TRUE	TRUE
HSPA4L	O95757	ENSG00000164070	heat shock protein family A (Hsp70) member 4 like [Source:HGNC Symbol;Acc:HGNC:17041]	TRUE	OID40297	NA	batch_2	NA	TRUE	FALSE
BSN	Q9UPA5	ENSG00000164061	bassoon presynaptic cytomatrix protein [Source:HGNC Symbol;Acc:HGNC:1117]	TRUE	OID40872	NA	batch_2	NA	TRUE	FALSE
SHISA5	Q8N114	ENSG00000164054	shisa family member 5 [Source:HGNC Symbol;Acc:HGNC:30376]	TRUE	OID45257	NA	batch_2	NA	TRUE	TRUE
CDC25A	P30304	ENSG00000164045	cell division cycle 25A [Source:HGNC Symbol;Acc:HGNC:1725]	TRUE	OID42247	NA	batch_2	NA	TRUE	FALSE
BDH2	Q9BUT1	ENSG00000164039	3-hydroxybutyrate dehydrogenase 2 [Source:HGNC Symbol;Acc:HGNC:32389]	TRUE	OID42179	NA	batch_2	NA	TRUE	FALSE
DNAJB14	Q8TBM8	ENSG00000164031	DnaJ heat shock protein family (Hsp40) member B14 [Source:HGNC Symbol;Acc:HGNC:25881]	TRUE	OID43618	NA	batch_2	NA	TRUE	TRUE
METAP1	P53582	ENSG00000164024	methionyl aminopeptidase 1 [Source:HGNC Symbol;Acc:HGNC:15789]	TRUE	OID42753	NA	batch_2	NA	TRUE	FALSE
EXO5	Q9H790	ENSG00000164002	exonuclease 5 [Source:HGNC Symbol;Acc:HGNC:26115]	TRUE	OID41175	NA	batch_2	NA	TRUE	FALSE
S100P	P25815	ENSG00000163993	S100 calcium binding protein P [Source:HGNC Symbol;Acc:HGNC:10504]	TRUE	OID44203	OID20103	batch_1+2	MedianCentering	TRUE	TRUE
MELTF	P08582	ENSG00000163975	melanotransferrin [Source:HGNC Symbol;Acc:HGNC:7037]	TRUE	OID44774	NA	batch_2	NA	TRUE	TRUE
RNF168	Q8IYW5	ENSG00000163961	ring finger protein 168 [Source:HGNC Symbol;Acc:HGNC:26661]	TRUE	OID44189	NA	batch_2	NA	TRUE	FALSE
LRPAP1	P30533	ENSG00000163956	LDL receptor related protein associated protein 1 [Source:HGNC Symbol;Acc:HGNC:6701]	TRUE	OID44758	NA	batch_2	NA	TRUE	TRUE
RFC4	P35249	ENSG00000163918	replication factor C subunit 4 [Source:HGNC Symbol;Acc:HGNC:9972]	TRUE	OID44180	NA	batch_2	NA	TRUE	TRUE
SENP2	Q9HC62	ENSG00000163904	SUMO specific peptidase 2 [Source:HGNC Symbol;Acc:HGNC:23116]	TRUE	OID41779	NA	batch_2	NA	TRUE	FALSE
KLF15	Q9UIH9	ENSG00000163884	KLF transcription factor 15 [Source:HGNC Symbol;Acc:HGNC:14536]	TRUE	OID40350	NA	batch_2	NA	TRUE	FALSE
DNALI1	O14645	ENSG00000163879	dynein axonemal light intermediate chain 1 [Source:HGNC Symbol;Acc:HGNC:14353]	TRUE	OID40170	NA	batch_2	NA	TRUE	FALSE
ZC3H12A	Q5D1E8	ENSG00000163874	zinc finger CCCH-type containing 12A [Source:HGNC Symbol;Acc:HGNC:26259]	TRUE	OID43296	NA	batch_2	NA	TRUE	FALSE
DTX3L	Q8TDB6	ENSG00000163840	deltex E3 ubiquitin ligase 3L [Source:HGNC Symbol;Acc:HGNC:30323]	TRUE	OID42388	NA	batch_2	NA	TRUE	TRUE
FBXO40	Q9UH90	ENSG00000163833	F-box protein 40 [Source:HGNC Symbol;Acc:HGNC:29816]	TRUE	OID40236	NA	batch_2	NA	TRUE	FALSE
FYCO1	Q9BQS8	ENSG00000163820	FYVE and coiled-coil domain autophagy adaptor 1 [Source:HGNC Symbol;Acc:HGNC:14673]	TRUE	OID42484	NA	batch_2	NA	TRUE	TRUE
LZTFL1	Q9NQ48	ENSG00000163818	leucine zipper transcription factor like 1 [Source:HGNC Symbol;Acc:HGNC:6741]	TRUE	OID44763	NA	batch_2	NA	TRUE	FALSE
CDCP1	Q9H5V8	ENSG00000163814	CUB domain containing protein 1 [Source:HGNC Symbol;Acc:HGNC:24357]	TRUE	OID43506	NA	batch_2	NA	TRUE	TRUE
KIF15	Q9NS87	ENSG00000163808	kinesin family member 15 [Source:HGNC Symbol;Acc:HGNC:17273]	TRUE	OID41373	NA	batch_2	NA	TRUE	FALSE
KIAA1143	Q96AT1	ENSG00000163807	KIAA1143 [Source:HGNC Symbol;Acc:HGNC:29198]	TRUE	OID42659	NA	batch_2	NA	TRUE	TRUE
PLB1	Q6P1J6	ENSG00000163803	phospholipase B1 [Source:HGNC Symbol;Acc:HGNC:30041]	TRUE	OID44099	NA	batch_2	NA	TRUE	TRUE
SNRK	Q9NRH2	ENSG00000163788	SNF related kinase [Source:HGNC Symbol;Acc:HGNC:30598]	TRUE	OID41827	NA	batch_2	NA	TRUE	FALSE
RYK	P34925	ENSG00000163785	receptor like tyrosine kinase [Source:HGNC Symbol;Acc:HGNC:10481]	TRUE	OID41760	NA	batch_2	NA	TRUE	FALSE
CXCL1	P09341	ENSG00000163739	C-X-C motif chemokine ligand 1 [Source:HGNC Symbol;Acc:HGNC:4602]	TRUE	OID44583	OID20762	batch_1+2	MedianCentering	TRUE	TRUE
PF4	P02776	ENSG00000163737	platelet factor 4 [Source:HGNC Symbol;Acc:HGNC:8861]	TRUE	OID45395	NA	batch_2	NA	TRUE	TRUE
PPBP	P02775	ENSG00000163736	pro-platelet basic protein [Source:HGNC Symbol;Acc:HGNC:9240]	TRUE	OID45483	NA	batch_2	NA	TRUE	TRUE
CXCL5	P42830	ENSG00000163735	C-X-C motif chemokine ligand 5 [Source:HGNC Symbol;Acc:HGNC:10642]	TRUE	OID44587	OID20207	batch_1+2	MedianCentering	TRUE	TRUE
CXCL3	P19876	ENSG00000163734	C-X-C motif chemokine ligand 3 [Source:HGNC Symbol;Acc:HGNC:4604]	TRUE	OID45101	OID20788	batch_1+2	MedianCentering	TRUE	TRUE
TTC14	Q96N46	ENSG00000163728	tetratricopeptide repeat domain 14 [Source:HGNC Symbol;Acc:HGNC:24697]	TRUE	OID41970	NA	batch_2	NA	TRUE	TRUE
PRRT3	Q5FWE3	ENSG00000163704	proline rich transmembrane protein 3 [Source:HGNC Symbol;Acc:HGNC:26591]	TRUE	OID44128	NA	batch_2	NA	TRUE	TRUE
CRELD1	Q96HD1	ENSG00000163703	cysteine rich with EGF like domains 1 [Source:HGNC Symbol;Acc:HGNC:14630]	TRUE	OID44567	NA	batch_2	NA	TRUE	TRUE
IL17RE	Q8NFR9	ENSG00000163701	interleukin 17 receptor E [Source:HGNC Symbol;Acc:HGNC:18439]	TRUE	OID40307	NA	batch_2	NA	TRUE	FALSE
APBB2	Q92870	ENSG00000163697	amyloid beta precursor protein binding family B member 2 [Source:HGNC Symbol;Acc:HGNC:582]	TRUE	OID40806	NA	batch_2	NA	TRUE	FALSE
CFAP20DC	Q6ZVT6	ENSG00000163689	CFAP20 domain containing [Source:HGNC Symbol;Acc:HGNC:24763]	TRUE	OID40109	NA	batch_2	NA	TRUE	FALSE
SLMAP	Q14BN4	ENSG00000163681	sarcolemma associated protein [Source:HGNC Symbol;Acc:HGNC:16643]	TRUE	OID44258	NA	batch_2	NA	TRUE	TRUE
DCLK3	Q9C098	ENSG00000163673	doublecortin like kinase 3 [Source:HGNC Symbol;Acc:HGNC:19005]	TRUE	OID40151	NA	batch_2	NA	TRUE	FALSE
PTX3	P26022	ENSG00000163661	pentraxin 3 [Source:HGNC Symbol;Acc:HGNC:9692]	TRUE	OID44882	OID20570	batch_1+2	MedianCentering	TRUE	TRUE
[truncated: 3,411 more rows]

## Sheet: S4.correl_covar
Table S4. Association of protein PCs with covariates
Association of PCs calculated on the proteomics dataset with the most important covariates at each visit
Columns: Visit_number - the visit number; PC - PC number; covariate - covariate name; pval: association significance based on linear regression (continuous covariates) or Kruskall-Wallis test (categorical covariates); bonferroni_signif - whether the association was Bonferroni-significant (at each visit); logp - -log10(P-value)
Visit_number	PC	covariate	pval	bonferroni_signif	logp
1	PC1	city_of_collection	1.0286e-15	TRUE	14.9878
4	PC5	Age	9.0103e-15	TRUE	14.0453
3	PC5	Age	3.92968e-13	TRUE	12.4056
4	PC1	city_of_collection	6.78765e-13	TRUE	12.1683
2	PC1	city_of_collection	1.45288e-11	TRUE	10.8378
3	PC1	city_of_collection	2.86395e-11	TRUE	10.543
2	PC3	BMI	1.62117e-10	TRUE	9.79017
1	PC3	BMI	5.869e-10	TRUE	9.23144
2	PC3	weight	9.74824e-10	TRUE	9.01107
3	PC3	BMI	1.75334e-09	TRUE	8.75613
1	PC3	Waist_circumference	4.0908e-09	TRUE	8.38819
2	PC3	Waist_circumference	8.68594e-09	TRUE	8.06118
4	PC3	BMI	2.10109e-08	TRUE	7.67756
1	PC6	storage_months	4.00721e-08	TRUE	7.39716
1	PC3	weight	4.32834e-08	TRUE	7.36368
3	PC3	weight	9.80063e-08	TRUE	7.00875
2	PC9	Age	2.40428e-07	TRUE	6.61902
3	PC3	Waist_circumference	2.54357e-07	TRUE	6.59456
4	PC3	weight	3.60845e-07	TRUE	6.44268
3	PC8	Age	4.82009e-07	TRUE	6.31694
1	PC6	city_of_collection	7.49918e-07	TRUE	6.12499
1	PC7	Age	1.10758e-06	TRUE	5.95563
1	PC3	Hip_circumference	1.79089e-06	TRUE	5.74693
3	PC4	storage_months	1.84832e-06	TRUE	5.73322
3	PC5	number_of_pregnancies	2.16383e-06	TRUE	5.66478
2	PC6	storage_months	5.21091e-06	TRUE	5.28309
1	PC8	storage_months	6.37898e-06	TRUE	5.19525
3	PC5	Pregnancy_category	8.6654e-06	TRUE	5.06221
3	PC5	Pill_use	2.08911e-05	TRUE	4.68004
2	PC3	Hip_circumference	2.61676e-05	TRUE	4.58224
4	PC5	Pregnancy_category	2.91893e-05	TRUE	4.53478
2	PC5	Age	3.50643e-05	TRUE	4.45513
3	PC7	city_of_collection	4.26472e-05	TRUE	4.37011
2	PC9	city_of_collection	4.65446e-05	TRUE	4.33213
4	PC5	number_of_pregnancies	6.06919e-05	TRUE	4.21687
1	PC9	city_of_collection	7.09488e-05	TRUE	4.14905
1	PC4	WHR	8.14815e-05	TRUE	4.08894
3	PC9	Age	0.000170471	TRUE	3.76835
3	PC10	storage_months	0.000188491	TRUE	3.72471
1	PC4	Age	0.000235411	TRUE	3.62817
1	PC3	Pregnancy_category	0.000249784	FALSE	3.60244
3	PC4	height	0.000295787	FALSE	3.52902
3	PC2	prior_covid_diagnosis	0.000312689	FALSE	3.50489
1	PC7	Pregnancy_category	0.000314878	FALSE	3.50186
4	PC8	WHR	0.000317296	FALSE	3.49854
3	PC5	Waist_circumference	0.000359346	FALSE	3.44449
4	PC4	city_of_collection	0.000359657	FALSE	3.44411
2	PC8	Age	0.000369607	FALSE	3.43226
4	PC4	storage_months	0.000385979	FALSE	3.41344
3	PC6	city_of_collection	0.000388483	FALSE	3.41063
3	PC2	storage_months	0.000390101	FALSE	3.40882
4	PC4	height	0.000449123	FALSE	3.34764
1	PC8	Age	0.000460754	FALSE	3.33653
1	PC7	Pill_use	0.000462187	FALSE	3.33518
1	PC3	number_of_pregnancies	0.000511448	FALSE	3.2912
3	PC9	Waist_circumference	0.000542997	FALSE	3.2652
3	PC3	Hip_circumference	0.000586788	FALSE	3.23152
4	PC3	Waist_circumference	0.000636695	FALSE	3.19607
4	PC5	years_since_pills	0.00070123	FALSE	3.15414
4	PC3	Hip_circumference	0.000711855	FALSE	3.14761
4	PC1	storage_months	0.000745868	FALSE	3.12734
4	PC2	storage_months	0.000758939	FALSE	3.11979
3	PC7	storage_months	0.000764933	FALSE	3.11638
1	PC6	Age	0.00107192	FALSE	2.96984
3	PC9	weight	0.00113808	FALSE	2.94383
3	PC6	storage_months	0.00114872	FALSE	2.93979
3	PC9	BMI	0.00135051	FALSE	2.8695
2	PC7	Pill_use	0.00145495	FALSE	2.83715
1	PC4	number_of_pregnancies	0.00182346	FALSE	2.7391
2	PC2	storage_months	0.00183557	FALSE	2.73623
1	PC7	number_of_pregnancies	0.00200013	FALSE	2.69894
1	PC4	Pregnancy_category	0.00204602	FALSE	2.68909
1	PC8	prior_covid_diagnosis	0.00206318	FALSE	2.68546
4	PC5	Pill_use	0.00211844	FALSE	2.67398
4	PC10	Age	0.00213966	FALSE	2.66966
4	PC7	storage_months	0.00222127	FALSE	2.6534
3	PC2	season	0.00277515	FALSE	2.55671
4	PC7	Age	0.0027938	FALSE	2.5538
3	PC4	city_of_collection	0.0028176	FALSE	2.55012
4	PC6	city_of_collection	0.00290982	FALSE	2.53613
4	PC8	Age	0.00308053	FALSE	2.51137
4	PC6	season	0.00312624	FALSE	2.50498
3	PC9	Hip_circumference	0.00320237	FALSE	2.49453
3	PC6	prior_covid_diagnosis	0.00329391	FALSE	2.48229
2	PC2	height	0.0038627	FALSE	2.41311
1	PC1	storage_months	0.00396797	FALSE	2.40143
2	PC6	city_of_collection	0.00412223	FALSE	2.38487
1	PC2	season	0.0046788	FALSE	2.32987
3	PC4	Waist_circumference	0.0051701	FALSE	2.2865
4	PC7	city_of_collection	0.00535652	FALSE	2.27112
4	PC4	BMI	0.00537275	FALSE	2.2698
2	PC6	prior_covid_diagnosis	0.00576054	FALSE	2.23954
4	PC4	WHR	0.00577986	FALSE	2.23808
1	PC2	BMI	0.00610845	FALSE	2.21407
2	PC5	Pregnancy_category	0.00622127	FALSE	2.20612
3	PC6	years_since_pills	0.00665573	FALSE	2.1768
2	PC1	Waist_circumference	0.00717524	FALSE	2.14416
4	PC5	prior_abdomen_interventions	0.00726182	FALSE	2.13895
4	PC2	season	0.00738306	FALSE	2.13176
4	PC7	Pill_use	0.00767584	FALSE	2.11487
1	PC4	Waist_circumference	0.00884304	FALSE	2.0534
2	PC6	alcohol_consumption	0.0095146	FALSE	2.02161
2	PC4	height	0.00954816	FALSE	2.02008
2	PC7	Age	0.00971986	FALSE	2.01234
3	PC4	BMI	0.00988161	FALSE	2.00517
3	PC6	Age	0.010472	FALSE	1.97997
4	PC5	city_of_collection	0.0105533	FALSE	1.97661
1	PC6	coffee_consumption	0.0109737	FALSE	1.95965
4	PC4	Waist_circumference	0.0111235	FALSE	1.95376
1	PC9	Waist_circumference	0.0111502	FALSE	1.95272
3	PC3	city_of_collection	0.0115149	FALSE	1.93874
4	PC7	season	0.0115517	FALSE	1.93735
1	PC5	height	0.0116563	FALSE	1.93344
3	PC9	city_of_collection	0.0120218	FALSE	1.92003
3	PC7	season	0.012169	FALSE	1.91475
3	PC4	prior_covid_diagnosis	0.0125917	FALSE	1.89991
1	PC9	BMI	0.0130676	FALSE	1.8838
1	PC1	season	0.0133858	FALSE	1.87335
1	PC9	storage_months	0.0140196	FALSE	1.85326
2	PC9	height	0.0140672	FALSE	1.85179
4	PC10	years_since_pills	0.0147351	FALSE	1.83165
4	PC6	storage_months	0.0148819	FALSE	1.82734
3	PC5	Hip_circumference	0.0152471	FALSE	1.81681
3	PC8	Pill_use	0.0161201	FALSE	1.79263
2	PC3	city_of_collection	0.0164522	FALSE	1.78378
3	PC4	WHR	0.0168411	FALSE	1.77363
3	PC10	city_of_collection	0.0171727	FALSE	1.76516
1	PC8	Waist_circumference	0.017303	FALSE	1.76188
1	PC1	Age	0.0174658	FALSE	1.75781
2	PC1	Age	0.0183195	FALSE	1.73709
4	PC9	prior_covid_diagnosis	0.0184793	FALSE	1.73332
2	PC5	number_of_pregnancies	0.0185704	FALSE	1.73118
1	PC1	years_since_pills	0.0196764	FALSE	1.70606
1	PC6	Smoker	0.0198512	FALSE	1.70221
2	PC2	Pill_use	0.0200455	FALSE	1.69798
4	PC8	Pill_use	0.0201552	FALSE	1.69561
2	PC5	years_since_pills	0.021613	FALSE	1.66529
1	PC10	weight	0.0221459	FALSE	1.65471
1	PC9	weight	0.0228433	FALSE	1.64124
4	PC3	Pregnancy_category	0.0237048	FALSE	1.62516
1	PC5	years_since_pills	0.0242648	FALSE	1.61502
1	PC8	city_of_collection	0.0244204	FALSE	1.61225
2	PC5	WHR	0.0244295	FALSE	1.61209
1	PC2	storage_months	0.0245929	FALSE	1.60919
2	PC9	BMI	0.024844	FALSE	1.60478
2	PC9	number_of_pregnancies	0.0249775	FALSE	1.60245
3	PC2	Pill_use	0.0255418	FALSE	1.59275
2	PC2	number_of_pregnancies	0.0257429	FALSE	1.58934
2	PC4	city_of_collection	0.0275724	FALSE	1.55953
3	PC5	BMI	0.0277278	FALSE	1.55708
2	PC10	Waist_circumference	0.0286617	FALSE	1.5427
3	PC9	number_of_pregnancies	0.0289004	FALSE	1.5391
1	PC4	BMI	0.0291175	FALSE	1.53585
4	PC9	Hip_circumference	0.0297209	FALSE	1.52694
1	PC1	coffee_consumption	0.0298338	FALSE	1.52529
4	PC9	Age	0.03059	FALSE	1.51442
1	PC10	Hip_circumference	0.0319157	FALSE	1.496
1	PC7	prior_covid_diagnosis	0.0325183	FALSE	1.48787
4	PC8	number_of_pregnancies	0.0340577	FALSE	1.46779
1	PC5	city_of_collection	0.0343423	FALSE	1.46417
2	PC2	Age	0.0344751	FALSE	1.46249
2	PC3	Pregnancy_category	0.0348615	FALSE	1.45765
1	PC8	Pill_use	0.0362173	FALSE	1.44108
2	PC4	Age	0.0362814	FALSE	1.44032
2	PC8	season	0.0377833	FALSE	1.4227
2	PC9	Pregnancy_category	0.0380209	FALSE	1.41998
4	PC9	city_of_collection	0.0387498	FALSE	1.41173
1	PC7	Waist_circumference	0.0387815	FALSE	1.41138
4	PC4	Age	0.0390552	FALSE	1.40832
1	PC3	Pill_use	0.0399494	FALSE	1.39849
2	PC4	alcohol_consumption	0.0405923	FALSE	1.39156
3	PC7	BMI	0.0411411	FALSE	1.38572
2	PC2	city_of_collection	0.0416764	FALSE	1.38011
4	PC8	BMI	0.0422679	FALSE	1.37399
2	PC8	Pill_use	0.0424793	FALSE	1.37182
3	PC6	WHR	0.0437468	FALSE	1.35905
2	PC1	storage_months	0.0439239	FALSE	1.3573
1	PC1	Waist_circumference	0.0440044	FALSE	1.3565
4	PC9	season	0.0442766	FALSE	1.35383
3	PC6	Pregnancy_category	0.0448471	FALSE	1.34827
3	PC2	city_of_collection	0.0456387	FALSE	1.34067
3	PC5	weight	0.0470419	FALSE	1.32752
4	PC3	city_of_collection	0.0471754	FALSE	1.32628
1	PC10	BMI	0.0473012	FALSE	1.32513
2	PC3	number_of_pregnancies	0.0473119	FALSE	1.32503
4	PC10	T2D_relatives	0.0473565	FALSE	1.32462
2	PC9	years_since_pills	0.0488833	FALSE	1.31084
2	PC3	storage_months	0.048979	FALSE	1.30999
2	PC5	BMI	0.0495708	FALSE	1.30477
1	PC3	Age	0.0502465	FALSE	1.29889
3	PC2	height	0.0503305	FALSE	1.29817
1	PC4	prior_abdomen_interventions	0.0506491	FALSE	1.29543
1	PC2	height	0.0514666	FALSE	1.28847
2	PC4	Smoker	0.0518883	FALSE	1.28493
2	PC7	alcohol_consumption	0.0518883	FALSE	1.28493
1	PC9	prior_covid_diagnosis	0.0519833	FALSE	1.28414
2	PC6	BMI	0.0528051	FALSE	1.27732
3	PC2	prior_abdomen_interventions	0.0530051	FALSE	1.27568
1	PC10	Waist_circumference	0.0557018	FALSE	1.25413
1	PC10	Age	0.0564518	FALSE	1.24832
4	PC8	Pregnancy_category	0.0567701	FALSE	1.24588
1	PC8	height	0.0579156	FALSE	1.2372
2	PC4	Waist_circumference	0.0580009	FALSE	1.23656
2	PC2	WHR	0.0583512	FALSE	1.23395
1	PC3	season	0.061759	FALSE	1.2093
1	PC10	T2D_relatives	0.0632318	FALSE	1.19906
3	PC9	Smoker	0.0634911	FALSE	1.19729
3	PC2	Age	0.0641732	FALSE	1.19265
1	PC7	Smoker	0.0642431	FALSE	1.19217
4	PC8	season	0.0642556	FALSE	1.19209
3	PC8	height	0.0649503	FALSE	1.18742
3	PC3	WHR	0.0660374	FALSE	1.18021
4	PC3	number_of_pregnancies	0.0679895	FALSE	1.16756
4	PC7	number_of_pregnancies	0.0698818	FALSE	1.15564
3	PC8	weight	0.0711193	FALSE	1.14801
2	PC9	Pill_use	0.0730954	FALSE	1.13611
2	PC5	prior_abdomen_interventions	0.0753821	FALSE	1.12273
3	PC1	T2D_relatives	0.075426	FALSE	1.12248
1	PC8	WHR	0.0755553	FALSE	1.12173
2	PC9	Waist_circumference	0.0777778	FALSE	1.10914
1	PC10	storage_months	0.0788592	FALSE	1.10315
1	PC4	years_since_pills	0.0791795	FALSE	1.10139
1	PC9	Hip_circumference	0.0794406	FALSE	1.09996
4	PC10	weight	0.0797744	FALSE	1.09814
1	PC8	prior_abdomen_interventions	0.0799712	FALSE	1.09707
4	PC10	storage_months	0.0803708	FALSE	1.0949
1	PC6	Pill_use	0.0812338	FALSE	1.09026
2	PC7	Pregnancy_category	0.0816	FALSE	1.08831
1	PC2	number_of_pregnancies	0.084692	FALSE	1.07216
4	PC10	coffee_consumption	0.0881895	FALSE	1.05458
2	PC7	number_of_pregnancies	0.090105	FALSE	1.04525
2	PC1	weight	0.0919629	FALSE	1.03639
1	PC9	alcohol_consumption	0.0929867	FALSE	1.03158
3	PC6	number_of_pregnancies	0.0955952	FALSE	1.01956
1	PC5	storage_months	0.0969147	FALSE	1.01361
4	PC8	city_of_collection	0.0990983	FALSE	1.00393
2	PC4	BMI	0.101664	FALSE	0.992833
3	PC1	years_since_pills	0.102146	FALSE	0.990779
4	PC1	Age	0.102602	FALSE	0.988844
4	PC8	weight	0.103115	FALSE	0.986677
2	PC10	Hip_circumference	0.105764	FALSE	0.975661
2	PC7	city_of_collection	0.108688	FALSE	0.963818
2	PC5	city_of_collection	0.108771	FALSE	0.963486
1	PC7	alcohol_consumption	0.108874	FALSE	0.963076
2	PC7	Smoker	0.1107	FALSE	0.955853
3	PC7	WHR	0.112699	FALSE	0.948082
4	PC4	prior_covid_diagnosis	0.113455	FALSE	0.945175
2	PC9	prior_covid_diagnosis	0.113656	FALSE	0.944409
2	PC3	WHR	0.115535	FALSE	0.937285
1	PC6	prior_covid_diagnosis	0.115732	FALSE	0.936547
4	PC6	prior_covid_diagnosis	0.115873	FALSE	0.936018
1	PC2	Age	0.115943	FALSE	0.935754
3	PC1	storage_months	0.116094	FALSE	0.935189
2	PC1	WHR	0.11765	FALSE	0.92941
4	PC8	Smoker	0.119795	FALSE	0.921562
2	PC10	coffee_consumption	0.119995	FALSE	0.920838
2	PC5	Pill_use	0.123649	FALSE	0.907811
1	PC2	Pregnancy_category	0.123698	FALSE	0.907638
3	PC6	prior_abdomen_interventions	0.124194	FALSE	0.905898
4	PC9	Waist_circumference	0.124239	FALSE	0.905743
1	PC8	weight	0.130146	FALSE	0.885569
4	PC4	Smoker	0.131428	FALSE	0.881312
3	PC2	alcohol_consumption	0.131631	FALSE	0.880642
3	PC1	Hip_circumference	0.133887	FALSE	0.873262
2	PC1	season	0.134929	FALSE	0.869894
1	PC1	number_of_pregnancies	0.135102	FALSE	0.869337
2	PC1	high_cholesterol_relatives	0.136337	FALSE	0.865386
4	PC2	height	0.138371	FALSE	0.858954
2	PC1	Smoker	0.138729	FALSE	0.857831
4	PC5	prior_covid_diagnosis	0.139494	FALSE	0.855445
1	PC8	alcohol_consumption	0.14176	FALSE	0.848447
1	PC2	city_of_collection	0.142705	FALSE	0.845559
3	PC8	Pregnancy_category	0.142872	FALSE	0.845052
1	PC1	T2D_relatives	0.143437	FALSE	0.843339
2	PC8	Smoker	0.14464	FALSE	0.83971
3	PC1	season	0.145189	FALSE	0.838066
3	PC8	number_of_pregnancies	0.145872	FALSE	0.836029
4	PC1	years_since_pills	0.146432	FALSE	0.834364
2	PC3	Pill_use	0.148905	FALSE	0.827091
2	PC10	Smoker	0.149199	FALSE	0.826234
4	PC10	BMI	0.152713	FALSE	0.816125
4	PC1	number_of_pregnancies	0.154494	FALSE	0.811089
3	PC9	Pregnancy_category	0.156216	FALSE	0.806275
3	PC9	prior_abdomen_interventions	0.156363	FALSE	0.805867
2	PC9	storage_months	0.156941	FALSE	0.804265
4	PC10	prior_abdomen_interventions	0.158378	FALSE	0.800306
4	PC7	BMI	0.158625	FALSE	0.799628
3	PC1	Waist_circumference	0.15934	FALSE	0.797675
4	PC7	weight	0.160413	FALSE	0.794759
2	PC1	years_since_pills	0.160568	FALSE	0.794342
4	PC2	prior_covid_diagnosis	0.163456	FALSE	0.786598
3	PC2	BMI	0.164772	FALSE	0.783116
3	PC10	coffee_consumption	0.164932	FALSE	0.782694
1	PC7	WHR	0.165599	FALSE	0.780942
2	PC7	high_cholesterol_relatives	0.165986	FALSE	0.779927
4	PC2	city_of_collection	0.16622	FALSE	0.779316
1	PC10	coffee_consumption	0.167701	FALSE	0.775465
2	PC2	Pregnancy_category	0.168191	FALSE	0.774196
3	PC5	years_since_pills	0.170797	FALSE	0.767521
3	PC7	weight	0.170816	FALSE	0.76747
2	PC7	prior_abdomen_interventions	0.171899	FALSE	0.764726
3	PC9	high_cholesterol_relatives	0.173595	FALSE	0.760462
1	PC8	number_of_pregnancies	0.173844	FALSE	0.759841
3	PC1	Smoker	0.173906	FALSE	0.759685
4	PC7	coffee_consumption	0.175435	FALSE	0.755884
1	PC6	height	0.175673	FALSE	0.755296
4	PC6	high_cholesterol_relatives	0.17574	FALSE	0.75513
1	PC7	storage_months	0.177206	FALSE	0.75152
4	PC8	Waist_circumference	0.178205	FALSE	0.74908
2	PC6	height	0.178355	FALSE	0.748716
4	PC2	BMI	0.178892	FALSE	0.747409
2	PC2	prior_covid_diagnosis	0.17934	FALSE	0.746322
3	PC9	years_since_pills	0.179439	FALSE	0.746083
2	PC9	coffee_consumption	0.184466	FALSE	0.734084
4	PC9	weight	0.184588	FALSE	0.733797
4	PC5	storage_months	0.189167	FALSE	0.723154
4	PC5	BMI	0.189304	FALSE	0.72284
1	PC10	alcohol_consumption	0.189745	FALSE	0.721831
2	PC8	prior_covid_diagnosis	0.193318	FALSE	0.713728
4	PC1	alcohol_consumption	0.193675	FALSE	0.712927
3	PC3	high_cholesterol_relatives	0.19442	FALSE	0.71126
3	PC5	high_cholesterol_relatives	0.19466	FALSE	0.710724
2	PC7	storage_months	0.196035	FALSE	0.707667
2	PC2	Hip_circumference	0.197044	FALSE	0.705436
4	PC1	coffee_consumption	0.199271	FALSE	0.700557
4	PC6	Smoker	0.200712	FALSE	0.697427
2	PC3	height	0.201363	FALSE	0.696021
1	PC8	Pregnancy_category	0.201425	FALSE	0.695887
2	PC1	coffee_consumption	0.203515	FALSE	0.691404
3	PC3	Smoker	0.203873	FALSE	0.69064
2	PC1	height	0.206663	FALSE	0.684737
1	PC9	coffee_consumption	0.207949	FALSE	0.682043
3	PC1	Age	0.210701	FALSE	0.676333
1	PC3	WHR	0.213983	FALSE	0.669621
3	PC7	prior_abdomen_interventions	0.21593	FALSE	0.665687
3	PC8	alcohol_consumption	0.216594	FALSE	0.664353
2	PC1	BMI	0.217296	FALSE	0.662949
2	PC4	coffee_consumption	0.221849	FALSE	0.653942
2	PC9	prior_abdomen_interventions	0.221873	FALSE	0.653895
4	PC9	years_since_pills	0.222756	FALSE	0.652171
3	PC2	number_of_pregnancies	0.225678	FALSE	0.646512
4	PC7	Hip_circumference	0.225712	FALSE	0.646446
4	PC2	Pregnancy_category	0.226055	FALSE	0.645786
4	PC3	prior_abdomen_interventions	0.226148	FALSE	0.645608
1	PC4	height	0.226799	FALSE	0.644359
3	PC6	coffee_consumption	0.227319	FALSE	0.643365
1	PC8	season	0.227431	FALSE	0.643151
4	PC5	weight	0.227465	FALSE	0.643086
1	PC5	Waist_circumference	0.227685	FALSE	0.642666
1	PC2	weight	0.228344	FALSE	0.641411
2	PC7	height	0.229335	FALSE	0.63953
4	PC3	high_cholesterol_relatives	0.230232	FALSE	0.637834
2	PC1	Hip_circumference	0.232045	FALSE	0.634428
1	PC5	prior_covid_diagnosis	0.232095	FALSE	0.634333
1	PC7	coffee_consumption	0.232475	FALSE	0.633623
2	PC8	years_since_pills	0.233844	FALSE	0.631074
1	PC3	high_cholesterol_relatives	0.234213	FALSE	0.630389
3	PC5	Smoker	0.235227	FALSE	0.628514
2	PC5	weight	0.237453	FALSE	0.624422
2	PC1	number_of_pregnancies	0.238963	FALSE	0.62167
4	PC7	Waist_circumference	0.240004	FALSE	0.619781
4	PC10	Pregnancy_category	0.241055	FALSE	0.617885
2	PC5	Waist_circumference	0.241112	FALSE	0.617781
4	PC2	number_of_pregnancies	0.242887	FALSE	0.614595
2	PC3	season	0.242989	FALSE	0.614414
1	PC9	WHR	0.245592	FALSE	0.609785
4	PC9	storage_months	0.245741	FALSE	0.609523
2	PC2	season	0.245894	FALSE	0.609252
4	PC4	season	0.24819	FALSE	0.605216
4	PC10	Hip_circumference	0.250175	FALSE	0.601756
2	PC1	Pregnancy_category	0.253956	FALSE	0.595242
3	PC5	prior_abdomen_interventions	0.254316	FALSE	0.594626
3	PC3	Pregnancy_category	0.25446	FALSE	0.59438
3	PC8	Hip_circumference	0.255082	FALSE	0.59332
4	PC2	Pill_use	0.25558	FALSE	0.592473
3	PC10	height	0.256502	FALSE	0.59091
1	PC4	high_cholesterol_relatives	0.256823	FALSE	0.590367
3	PC10	alcohol_consumption	0.256958	FALSE	0.590138
2	PC10	storage_months	0.258337	FALSE	0.587813
1	PC2	T2D_relatives	0.260486	FALSE	0.584215
2	PC2	BMI	0.260689	FALSE	0.583877
1	PC3	city_of_collection	0.262589	FALSE	0.580724
2	PC8	number_of_pregnancies	0.263286	FALSE	0.579573
3	PC7	high_cholesterol_relatives	0.265883	FALSE	0.575309
2	PC5	coffee_consumption	0.266754	FALSE	0.573889
2	PC8	city_of_collection	0.268111	FALSE	0.571686
1	PC9	prior_abdomen_interventions	0.268658	FALSE	0.570801
2	PC7	weight	0.277287	FALSE	0.557071
4	PC5	Hip_circumference	0.277876	FALSE	0.556149
4	PC2	prior_abdomen_interventions	0.278836	FALSE	0.554651
3	PC2	Pregnancy_category	0.281675	FALSE	0.550252
2	PC7	Waist_circumference	0.282193	FALSE	0.549454
4	PC9	prior_abdomen_interventions	0.282896	FALSE	0.548374
4	PC1	season	0.283066	FALSE	0.548112
1	PC3	storage_months	0.28367	FALSE	0.547187
4	PC7	Pregnancy_category	0.284434	FALSE	0.546018
2	PC4	Pregnancy_category	0.286841	FALSE	0.542359
3	PC7	Waist_circumference	0.287101	FALSE	0.541966
2	PC4	WHR	0.288221	FALSE	0.540274
4	PC5	Waist_circumference	0.288409	FALSE	0.539991
4	PC10	height	0.289125	FALSE	0.538914
4	PC4	Hip_circumference	0.289221	FALSE	0.538771
2	PC6	Hip_circumference	0.291757	FALSE	0.534979
1	PC10	height	0.294598	FALSE	0.53077
3	PC10	Pill_use	0.295145	FALSE	0.529964
3	PC7	prior_covid_diagnosis	0.297636	FALSE	0.526315
4	PC3	prior_covid_diagnosis	0.297777	FALSE	0.526108
2	PC6	Waist_circumference	0.298127	FALSE	0.525598
4	PC9	alcohol_consumption	0.299012	FALSE	0.524311
4	PC1	BMI	0.300457	FALSE	0.522218
3	PC6	Smoker	0.305178	FALSE	0.515446
3	PC7	number_of_pregnancies	0.306012	FALSE	0.514261
1	PC1	Hip_circumference	0.307885	FALSE	0.511612
4	PC1	Smoker	0.312422	FALSE	0.505258
2	PC9	Hip_circumference	0.312631	FALSE	0.504968
1	PC4	weight	0.313908	FALSE	0.503197
3	PC9	Pill_use	0.317085	FALSE	0.498824
4	PC10	Waist_circumference	0.317603	FALSE	0.498115
4	PC4	number_of_pregnancies	0.318339	FALSE	0.49711
1	PC2	alcohol_consumption	0.31951	FALSE	0.495516
3	PC10	prior_covid_diagnosis	0.321341	FALSE	0.493033
4	PC9	Pill_use	0.323172	FALSE	0.490567
3	PC10	Hip_circumference	0.324502	FALSE	0.488782
1	PC7	prior_abdomen_interventions	0.325112	FALSE	0.487967
1	PC3	prior_covid_diagnosis	0.326504	FALSE	0.486112
3	PC9	season	0.327792	FALSE	0.484401
2	PC10	city_of_collection	0.331978	FALSE	0.47889
4	PC1	weight	0.33285	FALSE	0.477751
1	PC5	season	0.334166	FALSE	0.476037
1	PC1	Pregnancy_category	0.334535	FALSE	0.475559
3	PC4	alcohol_consumption	0.335262	FALSE	0.474615
4	PC9	BMI	0.336281	FALSE	0.473297
3	PC8	BMI	0.337527	FALSE	0.471692
4	PC3	alcohol_consumption	0.339212	FALSE	0.469529
2	PC7	WHR	0.340435	FALSE	0.467966
3	PC3	years_since_pills	0.348218	FALSE	0.458148
1	PC9	Pregnancy_category	0.350896	FALSE	0.454822
1	PC5	weight	0.351709	FALSE	0.453817
2	PC5	Smoker	0.352491	FALSE	0.452851
4	PC7	high_cholesterol_relatives	0.354323	FALSE	0.4506
3	PC1	weight	0.354441	FALSE	0.450456
1	PC4	storage_months	0.359335	FALSE	0.444501
4	PC3	T2D_relatives	0.360204	FALSE	0.443451
3	PC3	storage_months	0.361041	FALSE	0.442444
4	PC10	city_of_collection	0.361403	FALSE	0.442008
4	PC6	prior_abdomen_interventions	0.362806	FALSE	0.440326
4	PC3	Pill_use	0.3636	FALSE	0.439376
4	PC6	Pill_use	0.3636	FALSE	0.439376
3	PC6	Waist_circumference	0.364181	FALSE	0.438683
3	PC2	years_since_pills	0.36601	FALSE	0.436507
4	PC1	Waist_circumference	0.370054	FALSE	0.431735
4	PC2	coffee_consumption	0.370973	FALSE	0.430658
4	PC8	prior_covid_diagnosis	0.371338	FALSE	0.43023
1	PC10	prior_abdomen_interventions	0.374004	FALSE	0.427124
2	PC6	season	0.377062	FALSE	0.423587
1	PC3	prior_abdomen_interventions	0.377662	FALSE	0.422897
4	PC2	T2D_relatives	0.380947	FALSE	0.419135
2	PC4	Hip_circumference	0.381441	FALSE	0.418573
2	PC3	Smoker	0.381446	FALSE	0.418567
4	PC9	WHR	0.383566	FALSE	0.41616
2	PC3	years_since_pills	0.385232	FALSE	0.414278
4	PC2	years_since_pills	0.385598	FALSE	0.413866
4	PC10	season	0.388503	FALSE	0.410605
3	PC9	WHR	0.389247	FALSE	0.409774
3	PC10	Smoker	0.390777	FALSE	0.408071
2	PC5	prior_covid_diagnosis	0.391982	FALSE	0.406733
3	PC10	high_cholesterol_relatives	0.392111	FALSE	0.406591
2	PC2	coffee_consumption	0.392475	FALSE	0.406188
3	PC8	WHR	0.395584	FALSE	0.402762
2	PC8	WHR	0.396125	FALSE	0.402168
2	PC6	weight	0.396183	FALSE	0.402104
1	PC1	prior_covid_diagnosis	0.396685	FALSE	0.401554
4	PC10	alcohol_consumption	0.396767	FALSE	0.401464
3	PC3	number_of_pregnancies	0.396972	FALSE	0.40124
1	PC5	Pregnancy_category	0.397809	FALSE	0.400326
2	PC10	alcohol_consumption	0.399499	FALSE	0.398485
2	PC4	Pill_use	0.399794	FALSE	0.398164
2	PC5	season	0.402471	FALSE	0.395265
1	PC6	BMI	0.406886	FALSE	0.390528
3	PC5	WHR	0.40905	FALSE	0.388224
4	PC2	alcohol_consumption	0.414757	FALSE	0.382207
1	PC4	city_of_collection	0.417574	FALSE	0.379266
2	PC3	Age	0.422937	FALSE	0.373724
3	PC3	Pill_use	0.424963	FALSE	0.371649
4	PC3	coffee_consumption	0.425214	FALSE	0.371392
4	PC1	prior_covid_diagnosis	0.427163	FALSE	0.369406
1	PC9	Smoker	0.429795	FALSE	0.366738
3	PC1	prior_covid_diagnosis	0.430738	FALSE	0.365787
1	PC10	prior_covid_diagnosis	0.43383	FALSE	0.36268
1	PC2	coffee_consumption	0.436799	FALSE	0.359718
3	PC1	BMI	0.43916	FALSE	0.357378
1	PC6	Pregnancy_category	0.440105	FALSE	0.356444
4	PC8	coffee_consumption	0.440425	FALSE	0.356128
1	PC7	years_since_pills	0.443805	FALSE	0.352808
4	PC3	storage_months	0.446847	FALSE	0.349841
1	PC3	Smoker	0.447294	FALSE	0.349407
1	PC6	season	0.449585	FALSE	0.347188
4	PC2	Smoker	0.450701	FALSE	0.346112
1	PC4	season	0.452483	FALSE	0.344398
4	PC9	height	0.452533	FALSE	0.34435
1	PC9	years_since_pills	0.452588	FALSE	0.344297
4	PC1	Hip_circumference	0.454584	FALSE	0.342386
2	PC3	T2D_relatives	0.454858	FALSE	0.342124
1	PC8	BMI	0.455135	FALSE	0.34186
4	PC3	height	0.456329	FALSE	0.340722
2	PC9	alcohol_consumption	0.456659	FALSE	0.340408
3	PC3	season	0.461736	FALSE	0.335606
1	PC2	Hip_circumference	0.46299	FALSE	0.334428
2	PC2	weight	0.46313	FALSE	0.334297
1	PC8	Hip_circumference	0.464389	FALSE	0.333118
2	PC2	T2D_relatives	0.468271	FALSE	0.329502
2	PC2	alcohol_consumption	0.469958	FALSE	0.327941
3	PC7	height	0.475269	FALSE	0.32306
1	PC3	alcohol_consumption	0.475785	FALSE	0.322589
2	PC10	Pregnancy_category	0.476629	FALSE	0.321819
1	PC1	height	0.477203	FALSE	0.321297
1	PC9	number_of_pregnancies	0.478256	FALSE	0.32034
3	PC9	T2D_relatives	0.479251	FALSE	0.319437
4	PC1	T2D_relatives	0.481454	FALSE	0.317445
1	PC10	city_of_collection	0.481476	FALSE	0.317425
4	PC2	WHR	0.484341	FALSE	0.314848
4	PC10	number_of_pregnancies	0.4866	FALSE	0.312828
3	PC4	high_cholesterol_relatives	0.487328	FALSE	0.312179
3	PC10	WHR	0.487334	FALSE	0.312173
4	PC4	alcohol_consumption	0.487373	FALSE	0.312138
3	PC5	season	0.491768	FALSE	0.30824
4	PC6	years_since_pills	0.491953	FALSE	0.308077
1	PC6	high_cholesterol_relatives	0.493075	FALSE	0.307087
2	PC9	Smoker	0.493739	FALSE	0.306503
3	PC4	Hip_circumference	0.498133	FALSE	0.302654
4	PC2	high_cholesterol_relatives	0.50056	FALSE	0.300544
1	PC6	T2D_relatives	0.502999	FALSE	0.298432
4	PC8	Hip_circumference	0.503118	FALSE	0.298331
4	PC6	weight	0.504547	FALSE	0.297099
3	PC9	height	0.507286	FALSE	0.294747
2	PC7	T2D_relatives	0.508801	FALSE	0.293452
3	PC8	prior_abdomen_interventions	0.50928	FALSE	0.293043
3	PC4	number_of_pregnancies	0.512196	FALSE	0.290563
3	PC9	prior_covid_diagnosis	0.514349	FALSE	0.288742
1	PC8	coffee_consumption	0.517521	FALSE	0.286072
1	PC5	high_cholesterol_relatives	0.517939	FALSE	0.285721
1	PC1	high_cholesterol_relatives	0.51852	FALSE	0.285234
4	PC3	WHR	0.520267	FALSE	0.283774
3	PC5	storage_months	0.523873	FALSE	0.280774
3	PC3	alcohol_consumption	0.525545	FALSE	0.27939
3	PC3	prior_covid_diagnosis	0.526103	FALSE	0.27893
2	PC9	WHR	0.526786	FALSE	0.278365
2	PC2	prior_abdomen_interventions	0.529446	FALSE	0.276178
1	PC2	prior_covid_diagnosis	0.531234	FALSE	0.274714
4	PC1	Pill_use	0.531615	FALSE	0.274403
1	PC5	WHR	0.532683	FALSE	0.273531
2	PC6	coffee_consumption	0.533996	FALSE	0.272462
3	PC1	height	0.535783	FALSE	0.271011
1	PC5	BMI	0.538727	FALSE	0.268631
2	PC8	BMI	0.538774	FALSE	0.268593
3	PC9	coffee_consumption	0.540439	FALSE	0.267253
2	PC5	storage_months	0.543782	FALSE	0.264575
1	PC9	season	0.548202	FALSE	0.261059
2	PC10	BMI	0.548834	FALSE	0.260559
1	PC8	T2D_relatives	0.552142	FALSE	0.257949
4	PC4	high_cholesterol_relatives	0.552447	FALSE	0.257709
1	PC1	WHR	0.555367	FALSE	0.25542
1	PC5	alcohol_consumption	0.556086	FALSE	0.254858
3	PC6	T2D_relatives	0.55646	FALSE	0.254566
4	PC6	BMI	0.556983	FALSE	0.254158
4	PC8	storage_months	0.557814	FALSE	0.25351
4	PC10	Pill_use	0.557992	FALSE	0.253372
2	PC9	weight	0.559271	FALSE	0.252377
2	PC5	height	0.559306	FALSE	0.252351
3	PC7	alcohol_consumption	0.559349	FALSE	0.252317
1	PC2	Pill_use	0.561112	FALSE	0.25095
2	PC5	alcohol_consumption	0.5614	FALSE	0.250728
2	PC6	years_since_pills	0.564848	FALSE	0.248069
2	PC10	season	0.566	FALSE	0.247183
4	PC3	Smoker	0.567038	FALSE	0.246388
4	PC7	prior_covid_diagnosis	0.57008	FALSE	0.244064
4	PC7	alcohol_consumption	0.570671	FALSE	0.243614
2	PC8	Pregnancy_category	0.571836	FALSE	0.242728
3	PC6	Hip_circumference	0.575997	FALSE	0.23958
2	PC8	T2D_relatives	0.577778	FALSE	0.238239
1	PC4	Pill_use	0.578482	FALSE	0.23771
4	PC4	Pregnancy_category	0.57936	FALSE	0.237052
3	PC6	weight	0.584779	FALSE	0.233008
2	PC10	high_cholesterol_relatives	0.585057	FALSE	0.232802
4	PC3	season	0.585784	FALSE	0.232262
2	PC1	Pill_use	0.588315	FALSE	0.23039
4	PC6	Hip_circumference	0.598227	FALSE	0.223134
1	PC6	alcohol_consumption	0.598577	FALSE	0.22288
2	PC4	T2D_relatives	0.605313	FALSE	0.21802
2	PC2	high_cholesterol_relatives	0.607712	FALSE	0.216302
2	PC10	height	0.608515	FALSE	0.215729
4	PC6	T2D_relatives	0.608695	FALSE	0.2156
2	PC1	T2D_relatives	0.611018	FALSE	0.213946
2	PC4	prior_covid_diagnosis	0.614581	FALSE	0.211421
3	PC7	Smoker	0.615984	FALSE	0.210431
3	PC1	WHR	0.616982	FALSE	0.209728
2	PC3	prior_covid_diagnosis	0.617533	FALSE	0.20934
4	PC9	T2D_relatives	0.621015	FALSE	0.206898
1	PC10	Smoker	0.625175	FALSE	0.203998
1	PC10	number_of_pregnancies	0.626046	FALSE	0.203394
1	PC6	number_of_pregnancies	0.628735	FALSE	0.201532
3	PC8	storage_months	0.62878	FALSE	0.201501
1	PC1	alcohol_consumption	0.628829	FALSE	0.201467
2	PC10	number_of_pregnancies	0.629606	FALSE	0.200931
1	PC7	Hip_circumference	0.629712	FALSE	0.200858
1	PC5	prior_abdomen_interventions	0.629931	FALSE	0.200707
4	PC6	Pregnancy_category	0.632748	FALSE	0.198769
1	PC3	height	0.633889	FALSE	0.197987
3	PC1	alcohol_consumption	0.633992	FALSE	0.197917
1	PC7	high_cholesterol_relatives	0.635443	FALSE	0.196923
2	PC6	prior_abdomen_interventions	0.638475	FALSE	0.194856
1	PC2	years_since_pills	0.639672	FALSE	0.194043
1	PC7	BMI	0.639969	FALSE	0.193841
1	PC7	season	0.640671	FALSE	0.193365
2	PC8	Waist_circumference	0.641734	FALSE	0.192645
2	PC2	Smoker	0.644946	FALSE	0.190476
3	PC6	BMI	0.64502	FALSE	0.190427
1	PC4	prior_covid_diagnosis	0.646853	FALSE	0.189195
1	PC4	Hip_circumference	0.647693	FALSE	0.188631
2	PC9	high_cholesterol_relatives	0.649878	FALSE	0.187168
3	PC6	height	0.650282	FALSE	0.186898
3	PC2	high_cholesterol_relatives	0.652056	FALSE	0.185715
2	PC6	T2D_relatives	0.652391	FALSE	0.185492
2	PC8	height	0.653949	FALSE	0.184456
2	PC7	BMI	0.656382	FALSE	0.182843
3	PC8	Waist_circumference	0.658327	FALSE	0.181559
3	PC2	T2D_relatives	0.658365	FALSE	0.181533
4	PC6	Waist_circumference	0.658833	FALSE	0.181225
3	PC4	Pregnancy_category	0.65912	FALSE	0.181036
4	PC5	season	0.660132	FALSE	0.180369
2	PC8	alcohol_consumption	0.660675	FALSE	0.180012
3	PC1	prior_abdomen_interventions	0.663582	FALSE	0.178105
3	PC9	storage_months	0.666779	FALSE	0.176018
1	PC5	Pill_use	0.671556	FALSE	0.172918
3	PC3	height	0.672798	FALSE	0.172115
4	PC3	Age	0.675399	FALSE	0.17044
4	PC2	Age	0.676693	FALSE	0.169608
1	PC4	T2D_relatives	0.677534	FALSE	0.169069
1	PC2	Waist_circumference	0.677969	FALSE	0.16879
2	PC4	years_since_pills	0.678155	FALSE	0.168671
3	PC10	weight	0.679308	FALSE	0.167933
1	PC7	weight	0.684201	FALSE	0.164816
3	PC2	WHR	0.689699	FALSE	0.16134
4	PC10	WHR	0.690659	FALSE	0.160736
3	PC8	T2D_relatives	0.691296	FALSE	0.160336
3	PC8	Smoker	0.69235	FALSE	0.159674
2	PC8	storage_months	0.69348	FALSE	0.158966
2	PC5	Hip_circumference	0.693884	FALSE	0.158713
2	PC1	prior_covid_diagnosis	0.696353	FALSE	0.15717
3	PC8	coffee_consumption	0.699921	FALSE	0.154951
4	PC5	high_cholesterol_relatives	0.70025	FALSE	0.154747
3	PC6	high_cholesterol_relatives	0.701627	FALSE	0.153894
2	PC5	T2D_relatives	0.703084	FALSE	0.152993
1	PC1	Smoker	0.70397	FALSE	0.152446
2	PC7	years_since_pills	0.705994	FALSE	0.151199
4	PC6	alcohol_consumption	0.71172	FALSE	0.147691
2	PC8	prior_abdomen_interventions	0.712398	FALSE	0.147277
1	PC2	high_cholesterol_relatives	0.712905	FALSE	0.146968
2	PC4	number_of_pregnancies	0.712944	FALSE	0.146945
3	PC4	years_since_pills	0.720092	FALSE	0.142612
4	PC2	Hip_circumference	0.722453	FALSE	0.14119
4	PC6	height	0.723446	FALSE	0.140594
4	PC8	high_cholesterol_relatives	0.725095	FALSE	0.139605
1	PC7	T2D_relatives	0.72772	FALSE	0.138036
2	PC4	prior_abdomen_interventions	0.728627	FALSE	0.137495
4	PC4	prior_abdomen_interventions	0.729484	FALSE	0.136984
3	PC2	Hip_circumference	0.730342	FALSE	0.136474
1	PC5	T2D_relatives	0.731318	FALSE	0.135894
2	PC6	Age	0.731957	FALSE	0.135515
4	PC6	number_of_pregnancies	0.733642	FALSE	0.134516
2	PC8	coffee_consumption	0.734818	FALSE	0.13382
4	PC1	Pregnancy_category	0.735597	FALSE	0.13336
1	PC9	high_cholesterol_relatives	0.736545	FALSE	0.132801
2	PC8	Hip_circumference	0.738343	FALSE	0.131742
2	PC1	prior_abdomen_interventions	0.739515	FALSE	0.131053
2	PC3	prior_abdomen_interventions	0.744978	FALSE	0.127856
4	PC5	WHR	0.747099	FALSE	0.126622
3	PC8	city_of_collection	0.748092	FALSE	0.126045
2	PC6	high_cholesterol_relatives	0.751196	FALSE	0.124247
2	PC7	season	0.752932	FALSE	0.123244
3	PC3	Age	0.753898	FALSE	0.122687
2	PC8	weight	0.756601	FALSE	0.121133
4	PC4	weight	0.760241	FALSE	0.119049
1	PC3	T2D_relatives	0.760866	FALSE	0.118692
2	PC5	high_cholesterol_relatives	0.761339	FALSE	0.118422
2	PC6	Pill_use	0.763635	FALSE	0.117114
2	PC10	Age	0.764052	FALSE	0.116877
1	PC9	Pill_use	0.76438	FALSE	0.11669
2	PC3	alcohol_consumption	0.766315	FALSE	0.115593
3	PC10	T2D_relatives	0.76666	FALSE	0.115397
4	PC9	coffee_consumption	0.77049	FALSE	0.113233
1	PC10	Pregnancy_category	0.772194	FALSE	0.112273
3	PC6	alcohol_consumption	0.772527	FALSE	0.112086
4	PC4	Pill_use	0.773386	FALSE	0.111604
3	PC10	Waist_circumference	0.775339	FALSE	0.110508
4	PC1	prior_abdomen_interventions	0.777859	FALSE	0.109099
4	PC8	prior_abdomen_interventions	0.777859	FALSE	0.109099
2	PC7	coffee_consumption	0.781287	FALSE	0.107189
4	PC7	T2D_relatives	0.783404	FALSE	0.106014
3	PC4	season	0.784188	FALSE	0.10558
1	PC8	years_since_pills	0.785999	FALSE	0.104578
2	PC6	Pregnancy_category	0.78906	FALSE	0.10289
4	PC7	years_since_pills	0.791111	FALSE	0.101763
3	PC5	height	0.79119	FALSE	0.101719
2	PC10	prior_covid_diagnosis	0.791501	FALSE	0.101548
4	PC9	high_cholesterol_relatives	0.793383	FALSE	0.100517
3	PC5	coffee_consumption	0.7943	FALSE	0.100015
1	PC3	years_since_pills	0.794434	FALSE	0.0999421
2	PC2	years_since_pills	0.79467	FALSE	0.099813
3	PC7	years_since_pills	0.795195	FALSE	0.0995265
1	PC8	Smoker	0.801299	FALSE	0.0962055
3	PC1	high_cholesterol_relatives	0.801607	FALSE	0.0960383
3	PC10	BMI	0.80414	FALSE	0.0946681
1	PC5	Smoker	0.805116	FALSE	0.0941417
3	PC8	prior_covid_diagnosis	0.80682	FALSE	0.0932232
2	PC3	coffee_consumption	0.806979	FALSE	0.0931377
2	PC1	alcohol_consumption	0.808264	FALSE	0.0924469
4	PC8	alcohol_consumption	0.80869	FALSE	0.0922181
3	PC8	season	0.809798	FALSE	0.0916235
2	PC3	high_cholesterol_relatives	0.810336	FALSE	0.0913351
1	PC9	Age	0.81234	FALSE	0.0902621
4	PC2	Waist_circumference	0.81297	FALSE	0.0899253
2	PC4	season	0.815169	FALSE	0.0887526
4	PC5	coffee_consumption	0.81546	FALSE	0.0885971
4	PC3	years_since_pills	0.817547	FALSE	0.0874874
4	PC5	height	0.81858	FALSE	0.086939
3	PC6	Pill_use	0.819682	FALSE	0.0863547
4	PC2	weight	0.821935	FALSE	0.0851623
2	PC10	weight	0.822609	FALSE	0.0848065
3	PC2	Smoker	0.823605	FALSE	0.0842813
1	PC5	Hip_circumference	0.824226	FALSE	0.0839535
3	PC1	Pill_use	0.826252	FALSE	0.0828877
2	PC10	Pill_use	0.834844	FALSE	0.0783945
1	PC10	season	0.836107	FALSE	0.0777381
1	PC8	high_cholesterol_relatives	0.836789	FALSE	0.077384
3	PC10	season	0.839843	FALSE	0.075802
4	PC7	height	0.84047	FALSE	0.075478
4	PC10	high_cholesterol_relatives	0.840899	FALSE	0.075256
2	PC6	Smoker	0.842231	FALSE	0.074569
3	PC4	coffee_consumption	0.842746	FALSE	0.0743031
4	PC9	Smoker	0.845161	FALSE	0.0730605
3	PC7	Pill_use	0.846032	FALSE	0.072613
3	PC7	T2D_relatives	0.848805	FALSE	0.0711923
3	PC4	T2D_relatives	0.849467	FALSE	0.0708536
4	PC10	prior_covid_diagnosis	0.849849	FALSE	0.0706583
4	PC8	years_since_pills	0.850806	FALSE	0.0701693
3	PC3	coffee_consumption	0.851625	FALSE	0.0697517
1	PC10	years_since_pills	0.852158	FALSE	0.0694798
3	PC4	Pill_use	0.852648	FALSE	0.0692301
1	PC9	height	0.85611	FALSE	0.0674706
2	PC9	season	0.85722	FALSE	0.0669079
1	PC5	number_of_pregnancies	0.861168	FALSE	0.0649119
3	PC10	years_since_pills	0.863476	FALSE	0.0637498
1	PC1	weight	0.870711	FALSE	0.0601262
4	PC1	height	0.874087	FALSE	0.0584452
3	PC10	Pregnancy_category	0.874815	FALSE	0.058084
3	PC1	Pregnancy_category	0.878955	FALSE	0.0560335
4	PC4	years_since_pills	0.87916	FALSE	0.0559319
3	PC8	years_since_pills	0.87953	FALSE	0.0557494
4	PC6	Age	0.880508	FALSE	0.0552665
4	PC6	coffee_consumption	0.881468	FALSE	0.0547936
1	PC1	BMI	0.882574	FALSE	0.0542489
2	PC10	WHR	0.883215	FALSE	0.0539338
1	PC9	T2D_relatives	0.890516	FALSE	0.0503581
4	PC7	prior_abdomen_interventions	0.891422	FALSE	0.0499165
2	PC6	number_of_pregnancies	0.891553	FALSE	0.049853
4	PC4	coffee_consumption	0.891708	FALSE	0.0497771
2	PC7	Hip_circumference	0.892124	FALSE	0.049575
3	PC7	Age	0.893452	FALSE	0.048929
4	PC5	T2D_relatives	0.893538	FALSE	0.048887
1	PC10	WHR	0.894601	FALSE	0.0483707
2	PC10	T2D_relatives	0.89506	FALSE	0.048148
1	PC6	Hip_circumference	0.895645	FALSE	0.0478643
1	PC2	Smoker	0.897911	FALSE	0.0467667
3	PC4	Smoker	0.898011	FALSE	0.0467182
3	PC10	prior_abdomen_interventions	0.898551	FALSE	0.0464573
3	PC7	coffee_consumption	0.900763	FALSE	0.0453893
1	PC5	coffee_consumption	0.904163	FALSE	0.0437532
3	PC9	alcohol_consumption	0.905252	FALSE	0.0432303
4	PC8	T2D_relatives	0.906718	FALSE	0.042528
1	PC6	prior_abdomen_interventions	0.908155	FALSE	0.0418401
4	PC9	number_of_pregnancies	0.911412	FALSE	0.0402853
2	PC4	weight	0.912571	FALSE	0.0397335
4	PC5	alcohol_consumption	0.913745	FALSE	0.0391748
3	PC5	T2D_relatives	0.913874	FALSE	0.0391136
4	PC4	T2D_relatives	0.914001	FALSE	0.0390531
4	PC5	Smoker	0.914194	FALSE	0.0389615
4	PC7	WHR	0.917725	FALSE	0.0372873
1	PC1	Pill_use	0.91848	FALSE	0.0369301
1	PC7	city_of_collection	0.919318	FALSE	0.0365343
1	PC4	alcohol_consumption	0.927547	FALSE	0.0326642
3	PC10	Age	0.930259	FALSE	0.0313963
3	PC4	Age	0.93096	FALSE	0.031069
1	PC3	coffee_consumption	0.932034	FALSE	0.0305683
2	PC10	years_since_pills	0.932305	FALSE	0.0304421
2	PC8	high_cholesterol_relatives	0.932864	FALSE	0.0301815
2	PC9	T2D_relatives	0.932879	FALSE	0.0301746
3	PC5	city_of_collection	0.934238	FALSE	0.0295424
3	PC5	prior_covid_diagnosis	0.935036	FALSE	0.0291715
4	PC10	Smoker	0.935591	FALSE	0.0289138
3	PC8	high_cholesterol_relatives	0.936752	FALSE	0.0283756
3	PC5	alcohol_consumption	0.936752	FALSE	0.0283753
3	PC7	Hip_circumference	0.93775	FALSE	0.027913
3	PC1	number_of_pregnancies	0.939367	FALSE	0.0271648
2	PC7	prior_covid_diagnosis	0.939792	FALSE	0.0269685
4	PC1	high_cholesterol_relatives	0.940992	FALSE	0.0264139
1	PC4	Smoker	0.940995	FALSE	0.0264128
1	PC7	height	0.944942	FALSE	0.0245948
3	PC4	weight	0.945527	FALSE	0.0243261
3	PC7	Pregnancy_category	0.945571	FALSE	0.024306
2	PC4	high_cholesterol_relatives	0.948085	FALSE	0.0231528
1	PC6	years_since_pills	0.949094	FALSE	0.0226909
3	PC2	coffee_consumption	0.950285	FALSE	0.022146
4	PC8	height	0.950567	FALSE	0.0220172
2	PC6	WHR	0.952281	FALSE	0.0212349
1	PC2	WHR	0.953633	FALSE	0.0206187
3	PC1	coffee_consumption	0.9548	FALSE	0.0200877
4	PC1	WHR	0.956405	FALSE	0.0193582
3	PC3	prior_abdomen_interventions	0.958133	FALSE	0.0185742
1	PC10	Pill_use	0.959187	FALSE	0.0180968
2	PC2	Waist_circumference	0.962597	FALSE	0.0165553
2	PC4	storage_months	0.963768	FALSE	0.0160276
3	PC4	prior_abdomen_interventions	0.96411	FALSE	0.0158736
2	PC10	prior_abdomen_interventions	0.965407	FALSE	0.0152894
4	PC9	Pregnancy_category	0.969505	FALSE	0.0134499
3	PC3	T2D_relatives	0.969552	FALSE	0.0134288
4	PC6	WHR	0.969607	FALSE	0.0134044
1	PC6	weight	0.970384	FALSE	0.0130565
1	PC6	WHR	0.973204	FALSE	0.0117961
1	PC10	high_cholesterol_relatives	0.975574	FALSE	0.01074
1	PC4	coffee_consumption	0.979988	FALSE	0.00877932
3	PC6	season	0.980279	FALSE	0.00865015
1	PC1	prior_abdomen_interventions	0.989171	FALSE	0.00472861
1	PC2	prior_abdomen_interventions	0.989171	FALSE	0.00472861
4	PC7	Smoker	0.989254	FALSE	0.00469225
1	PC6	Waist_circumference	0.992181	FALSE	0.00340903
3	PC2	Waist_circumference	0.993116	FALSE	0.00300007
3	PC10	number_of_pregnancies	0.99543	FALSE	0.00198912
1	PC5	Age	0.995858	FALSE	0.00180256
3	PC2	weight	0.996513	FALSE	0.00151721

## Sheet: S5.ICC
Table S5. Intraclass correlation coefficient for each protein
ICC reflects the proportion of variance explained by differences between individuals as opposed to phase contribution to protein variance
Columns: protein - gene name; ICC - intraclass correlation coefficient; R2_phase - marginal R2 representing variance explained by the timepoint
protein	ICC	R2_phase
JCHAIN	0.0968628	0.00345596
TIA1	0.184249	0.000434701
VCAM1	0.18612	0.00095506
IL33	0.201469	4.75241e-05
MERTK	0.208511	0.000286695
CSF3	0.212886	0.000124141
AMBN	0.215695	0.00264251
NTRK2	0.235323	0.00491895
TGM2	0.243938	0.00134481
ITM2A	0.273138	0.000366843
TNFAIP8	0.280922	0.000186757
CEBPB	0.281545	0.000254515
HYAL1	0.284231	1.07369e-05
IL12RB1	0.285779	2.56926e-05
PKLR	0.291332	7.1525e-05
CA1	0.297605	0.000207913
IL1RN	0.300743	0.00034868
GLRX	0.322028	0.000267044
LGALS3	0.326519	0.000400046
CCL20	0.340004	0.00104149
NBN	0.340362	0.00160798
LY6D	0.345714	0.00301805
S100A11	0.347385	1.15922e-07
FGF19	0.352836	0.00417606
IL11	0.353154	0.000929329
IFNG	0.354291	0.00188805
PCSK9	0.359409	0.00299092
NFATC3	0.360958	0.00334894
ITGB1	0.368961	0.00974867
NPPC	0.381692	0.0077319
CLTA	0.382112	0.000540551
PGF	0.390698	0.000390823
CD84	0.392951	1.34357e-05
WNT9A	0.395373	0.000210303
PROK1	0.400829	0.28279
IL6	0.402345	0.00680864
CEP43	0.404234	0.00116474
DCN	0.406502	0.000859886
FST	0.407652	0.018662
IL4R	0.411557	0.000280434
CD200	0.414331	2.56329e-05
PRKCQ	0.418493	7.40994e-05
ACE2	0.418843	0.000993666
SPON2	0.423178	0.000201156
VWF	0.426855	0.00112878
IL6ST	0.42748	0.000639184
TGFA	0.429585	0.00196995
S100P	0.43196	0.00126822
NOTCH1	0.432584	0.00160437
MCAM	0.433039	0.00487164
SEMA3F	0.438773	0.000889095
ANGPTL4	0.439703	0.00773351
CHRDL2	0.442222	0.0193956
CA3	0.449548	0.00199318
IL15	0.453501	0.00302216
CANT1	0.4557	0.0007529
SLAMF1	0.457894	0.00141717
DNPH1	0.46036	0.000548626
NPDC1	0.460638	1.03669e-05
MET	0.462509	0.0012515
EIF4EBP1	0.470101	7.74529e-07
FCRL1	0.471711	4.46405e-05
ENAH	0.47255	0.0157261
BOC	0.477383	0.00890398
FABP2	0.478839	2.47635e-05
ERBB3	0.478969	0.00916082
TGFBR3	0.479254	0.00743046
C2	0.480438	0.00510523
PTPRF	0.480599	0.00166232
NRCAM	0.481857	0.0022958
TNFRSF13C	0.484344	0.00307292
GZMB	0.485602	4.12495e-05
PRELP	0.487004	0.001079
CXCL8	0.487279	0.0190954
MEGF9	0.487314	5.00253e-05
FAM3C	0.489809	0.000246634
DAPP1	0.489965	0.000140209
MILR1	0.492442	0.000307643
CD59	0.493045	7.90575e-05
PTX3	0.493687	0.00338173
CTF1	0.494473	0.000429492
B4GALT1	0.495085	0.000857402
REN	0.495135	0.076534
PAM	0.495673	0.00169432
CD14	0.496983	0.031782
CTSL	0.497224	9.50858e-05
FSTL3	0.497423	0.000334557
CST3	0.500384	0.00173219
NTF3	0.501468	0.00303928
F9	0.501889	0.00594968
PROC	0.503145	0.0359964
TIMP1	0.504798	0.0158462
EGFR	0.510705	0.00127423
SIT1	0.511647	9.40038e-07
LSP1	0.512589	0.00311198
IL17C	0.517544	3.38165e-05
PTGDS	0.520195	0.001042
LTBR	0.520722	0.0117323
ACTA2	0.521111	0.00133798
ANGPTL3	0.521636	0.00367707
TCL1B	0.524569	0.0001361
EPHA1	0.52479	0.00647536
AHCY	0.524885	0.00227107
FABP1	0.525132	0.00372844
TPP1	0.526475	0.0049706
CXCL1	0.526728	0.00305205
GH1	0.52673	0.000311474
LHPP	0.529254	0.000568919
MFAP5	0.53021	0.0502186
TYMP	0.530778	0.000617409
ENG	0.531182	0.00795095
TNFSF13	0.531332	0.000595115
PIK3AP1	0.531435	8.70436e-05
HLA-DRA	0.532858	0.000453262
ITIH3	0.533006	0.00240719
TNF	0.533266	0.000285558
CXCL16	0.534767	0.00160168
IFNGR1	0.537076	0.00428527
CXCL6	0.537858	0.0177816
BACH1	0.538641	0.000675755
GSTA1	0.538961	0.0115404
ANXA4	0.539609	0.00171098
FAS	0.539743	0.0605847
CD2AP	0.543009	0.000185548
APOM	0.543763	0.00992424
CSF1	0.544359	0.00801301
FGF5	0.545	2.05401e-05
MATN2	0.546423	0.00307952
CRIM1	0.546898	0.00208077
NECTIN2	0.547778	0.000272037
IL10	0.548221	2.57123e-05
ROBO1	0.548418	0.00174209
ALCAM	0.549138	0.00603825
ANGPTL1	0.550436	0.0240862
LPL	0.550503	0.000187299
IGFBP1	0.55068	2.22546e-05
NCF2	0.550709	0.00149872
CD4	0.553346	0.00228448
ADGRE2	0.554288	0.00122262
LAMA4	0.555409	8.34044e-06
SCGN	0.555881	0.0186018
PRSS8	0.556113	0.0227547
MCFD2	0.556264	0.00624341
ADH4	0.556562	0.0260702
PSMG3	0.556616	2.82003e-05
NADK	0.557128	0.000497455
CD55	0.557382	2.19335e-05
EDAR	0.558309	0.00159982
EFEMP1	0.560309	0.000244673
OSM	0.561946	0.0147222
LIFR	0.562865	3.53252e-05
LBP	0.564234	0.000631001
HYOU1	0.564899	1.65009e-05
CRHBP	0.565433	0.0114487
VAMP5	0.565785	0.00127768
MNDA	0.566266	0.00121867
F7	0.566964	0.00264898
CTSD	0.567074	0.00393519
TNFSF10	0.567156	0.0780665
FOXO1	0.567374	0.000130334
CKAP4	0.567797	0.00875305
CCDC80	0.567967	0.00144689
IL17A	0.568672	0.00248212
CTSZ	0.569213	0.00130289
THPO	0.570817	0.00486983
TFRC	0.570901	6.23003e-05
IGFBP3	0.57464	0.000479473
TNFSF13B	0.575522	0.00089254
NID1	0.575908	0.00048275
MMP10	0.576608	0.000461298
KRT19	0.57668	0.00907735
HSPG2	0.576863	1.86069e-05
SDC4	0.577126	0.00130317
CXCL9	0.577778	0.00515279
KYNU	0.578474	0.0211815
AGRN	0.578708	0.00930571
CHRDL1	0.578969	0.00223209
ADGRE5	0.579385	0.00403651
ISM1	0.580315	5.06548e-06
CTSB	0.580537	0.00349675
ENTPD5	0.580828	0.0268741
SERPINE1	0.584139	0.00184576
FABP9	0.586333	0.000785631
USP8	0.587932	2.0259e-06
NME3	0.588889	5.31808e-05
RNASET2	0.588984	0.000584088
CNTN1	0.589871	0.00077101
VEGFA	0.590367	7.56432e-05
TINAGL1	0.590399	0.0017144
TNFSF12	0.591192	0.0120056
FETUB	0.591738	0.0251512
ENTPD6	0.592403	0.00355139
BTN3A2	0.595493	0.000211205
CCN2	0.595785	7.62831e-07
AGXT	0.596385	0.00516508
EPHB4	0.596971	0.0100867
MMP7	0.597837	0.00114311
FABP6	0.598988	0.00121108
VASN	0.599227	0.0037731
LGALS4	0.599626	0.00601883
TCN2	0.599646	0.00632289
THOP1	0.600248	0.00466184
IGFBPL1	0.600635	0.000288125
IGFBP6	0.603415	0.00582204
PPP1R2	0.604135	0.00124874
IGFBP7	0.604499	0.0380821
CNPY2	0.606572	0.00118625
CLEC4G	0.609105	0.000539891
OLR1	0.609355	0.00283578
SPINT2	0.609457	7.49343e-05
IL18BP	0.609761	0.00125404
CDH6	0.610084	0.00123168
ANG	0.611484	0.000350482
CCL27	0.611795	0.00147197
COL18A1	0.613149	0.0117023
GDF2	0.613453	0.00901563
ANGPT1	0.614073	0.000390268
AGRP	0.614267	0.0152213
CD58	0.614287	0.0012282
RABGAP1L	0.616087	1.96562e-05
SOD1	0.617254	0.000110461
TNFRSF14	0.618148	2.02807e-05
ITGA6	0.618593	2.08865e-05
ICA1	0.61871	0.000156978
LEPR	0.619612	3.57375e-06
AK1	0.620084	0.00138014
NPPB	0.621166	0.00106866
DNER	0.62163	0.0044719
SH2D1A	0.622001	0.000102121
CTSC	0.622127	5.67877e-05
CTSO	0.623222	0.0195559
TFPI	0.623376	0.0384458
RARRES2	0.625354	0.00257311
LGALS1	0.625997	1.70905e-05
CRLF1	0.626354	0.0301907
PLAUR	0.626672	0.0215624
ZBTB17	0.627084	0.00143631
CD93	0.627403	0.0046505
NT-proBNP	0.628097	1.10275e-06
EGLN1	0.628184	0.000702671
XG	0.628505	0.00320569
PCOLCE	0.629884	0.00804393
CCL3	0.630759	9.63229e-05
C1QTNF1	0.63091	0.00119338
DKK3	0.631483	4.80969e-06
COLEC12	0.632121	0.00320692
CD46	0.632136	5.01024e-06
GPNMB	0.632616	0.000853091
IL16	0.633255	8.01926e-05
MVK	0.633625	0.000182661
NCAM1	0.633685	0.000494687
MSTN	0.633801	0.00322805
COL6A3	0.635152	0.00697884
REG1B	0.637325	0.00897964
PTPRS	0.640022	0.00166101
PRKAB1	0.640839	6.68705e-06
SORT1	0.641617	0.00216137
PEAR1	0.641639	0.0101162
DFFA	0.641657	0.000107328
CDH2	0.641745	0.00170701
TSPAN1	0.642673	0.00242411
CA4	0.643026	0.000135868
CDON	0.643776	0.00530008
GALNT3	0.644459	0.000305286
NCK2	0.645415	0.000238047
REG4	0.648447	0.0122597
BSG	0.649147	0.000891314
TNFRSF11A	0.649413	0.000181935
CCN3	0.650136	0.0115143
GAS6	0.65147	0.000216271
THBD	0.651766	0.00138847
LGMN	0.651802	1.2771e-05
CD83	0.652045	0.00198788
PLXNB3	0.652956	0.000582157
LILRB4	0.653123	0.00101262
SCG3	0.653137	0.000444589
SELP	0.6533	0.00078653
SIGLEC7	0.653503	0.00998703
ENPP2	0.654018	0.0193442
STX8	0.654272	0.0038465
PRTN3	0.654576	6.91592e-07
HCLS1	0.654733	3.7376e-07
NOTCH3	0.656297	9.54277e-05
PAG1	0.657007	0.000268306
CLEC5A	0.658563	0.00315048
CNTNAP2	0.661431	0.000521253
MAPK9	0.661516	8.035e-05
SMOC2	0.661595	0.00038339
BTN2A1	0.661669	0.0132559
IL17D	0.662182	0.00414203
APLP1	0.662369	0.000779603
CCL14	0.662399	0.00438116
PDGFA	0.66277	0.000243036
IRAK1	0.664054	0.000416759
TGFB1	0.664891	1.10692e-06
SPON1	0.665012	0.0130024
CEACAM8	0.665585	0.00420762
GPR37	0.665626	0.00156519
CXCL10	0.665673	0.00137619
NRP1	0.665912	0.0150982
GZMA	0.666116	2.85251e-06
BCR	0.666596	0.000156635
QDPR	0.666624	0.00763406
LDLR	0.667367	0.00199105
ART3	0.668129	0.000165381
DPP7	0.668184	2.3547e-05
PLXNB2	0.668375	0.00106588
CKMT1A_CKMT1B	0.668838	0.0119086
PDGFRA	0.669026	3.94942e-05
GDF15	0.669358	0.0155111
DCTPP1	0.669967	0.00165216
HMOX1	0.671608	0.00208643
OSMR	0.67184	0.00820949
NUB1	0.672721	1.4516e-07
BAG6	0.672783	0.000242381
ROR1	0.672944	0.00254848
CCL11	0.673451	0.0236263
SCARF1	0.673623	0.00221248
CXCL3	0.673957	0.0025905
ESAM	0.673964	0.000729177
AOC3	0.674326	0.014654
PSIP1	0.67447	5.30274e-05
DAG1	0.675082	0.00197754
SLITRK6	0.675367	0.000655961
PLTP	0.67642	0.00112226
AZU1	0.676573	0.000558146
TNFSF11	0.67809	0.0145995
CCL26	0.678228	0.000966364
SRPK2	0.678573	8.5698e-05
IL1RL2	0.678731	0.000127319
CCL4	0.679035	0.000102312
LRP11	0.679568	0.0123511
GLO1	0.679655	0.000371329
ACY1	0.680653	0.0217186
SIGLEC1	0.68112	0.00172185
AXL	0.681639	0.00215431
ANPEP	0.683054	0.000948797
COMP	0.684069	0.00179971
TFF3	0.685055	0.00435238
MMP1	0.686627	0.00648521
VSIR	0.687527	0.000277049
IL1R2	0.688028	0.00313786
TSHB	0.688457	0.00435275
BANK1	0.689677	8.8718e-07
METAP1D	0.690325	0.0001448
CNST	0.690382	4.13723e-05
ADGRG2	0.69042	0.00241851
IL12B	0.690805	0.00136056
IRAK4	0.691725	1.95779e-05
FIS1	0.691956	0.000912434
ICAM1	0.692005	0.00355173
HEXIM1	0.692639	2.58385e-05
HSD11B1	0.692714	0.00202181
CCL23	0.693927	0.000106639
PLIN3	0.695655	3.59235e-05
ANGPTL2	0.69703	1.94017e-06
EDIL3	0.698065	0.00351661
GRAP2	0.698264	1.88504e-05
CXCL5	0.698498	0.00228256
SEMA7A	0.699025	0.00123853
MPHOSPH8	0.699579	0.000435634
EGF	0.700289	4.57501e-05
ACAN	0.700324	0.0030551
KLRD1	0.700798	0.00525226
LAMP3	0.701457	0.00602447
SDC1	0.701654	0.000242029
LCN2	0.701655	0.0038917
PTN	0.701871	0.000239557
SCRN1	0.70306	4.7134e-05
CD244	0.703359	0.0159757
FASLG	0.703535	0.0199623
TGFBI	0.704495	1.06659e-06
PTH1R	0.705121	0.0156689
LAT	0.705942	0.00042248
GLOD4	0.706121	2.4221e-05
PPP1R9B	0.706445	6.9622e-05
KYAT1	0.707828	0.000679183
DPP4	0.70848	0.00346489
IGFBP2	0.709378	0.0188446
RNASE3	0.710951	1.44835e-06
REG1A	0.711516	0.0088348
YTHDF3	0.712116	0.00103136
TNFRSF11B	0.713405	0.000439053
CLEC1A	0.71345	0.0014374
GOPC	0.713716	0.000159232
DPT	0.714073	0.00468366
PDGFB	0.714378	0.00133894
CLEC4C	0.715019	0.000736925
TP53INP1	0.715104	4.45695e-05
CSTB	0.715747	0.000160212
AXIN1	0.715841	0.000304561
NPTXR	0.716023	0.00356312
STK4	0.716241	0.000395389
TIMP3	0.716373	0.00847247
CCL5	0.71743	0.000540788
IL10RB	0.717604	0.00449627
TFF2	0.718809	0.00712179
CDH5	0.719497	0.00492048
CDH1	0.722656	1.3573e-05
FLT3LG	0.722677	0.00643606
SERPINA11	0.723239	0.00405801
ITGB2	0.723826	0.000633379
SERPINB8	0.723941	0.00205977
SOST	0.724489	0.00475284
DPP10	0.724653	0.0012668
PLA2G2A	0.724688	0.00336155
TNFRSF13B	0.724824	0.000888496
CCL13	0.725419	0.00396536
LGALS9	0.726721	0.0119848
FADD	0.727061	0.000172483
PDCD6	0.727187	0.000102412
IFNLR1	0.728278	0.0226245
PNPT1	0.728334	9.19881e-05
ITGB1BP2	0.728448	7.25887e-05
PLA2G4A	0.728537	0.0024779
PRCP	0.730142	0.00430152
NCR1	0.730493	0.000209035
CELA3A	0.73174	0.000111743
CA13	0.732421	0.000309195
GGH	0.732477	0.00313625
CD48	0.732559	0.000389391
ICAM3	0.733087	0.000178654
ADAM15	0.734173	5.82942e-07
LILRA5	0.734388	0.00107131
SNX9	0.735391	5.70056e-05
MARCO	0.737051	0.00610853
CLEC4D	0.738817	0.0028892
CCL28	0.739173	0.000166818
CHI3L1	0.73918	0.00418541
PCDH17	0.740023	0.0010914
F2R	0.741561	0.000240238
IKBKG	0.741621	2.81387e-05
QPCT	0.741656	0.019199
TRIM21	0.741745	0.00122525
CLSTN2	0.742391	0.0204628
CLC	0.743017	5.83657e-05
IL32	0.743249	0.00305936
PTPN6	0.747044	0.000427862
CPB1	0.748008	0.000186531
GMPR	0.750813	0.000141886
SLC39A5	0.750979	0.0155491
CRELD2	0.751399	0.000222249
WAS	0.751689	0.00249007
PLPBP	0.751805	0.000373433
MEPE	0.754479	0.000316688
CD276	0.754624	0.0318055
SNAP23	0.754711	0.000215764
TYRO3	0.756273	0.00295052
PON3	0.756658	5.28028e-05
MANF	0.756755	0.00131659
PLA2G1B	0.759475	6.07776e-05
CHL1	0.759569	0.0015208
CLEC4A	0.759675	0.00234925
IL1RL1	0.759909	0.00816327
ADAMTS13	0.760959	0.0040741
CCL22	0.76128	5.25862e-06
GZMH	0.761342	0.000159552
ESM1	0.761622	0.0022791
PRSS27	0.762035	0.00388832
CCL17	0.76229	0.00394399
OSCAR	0.762856	0.00103884
GUSB	0.763364	0.0134609
NFASC	0.763591	0.000864218
MYO9B	0.763601	3.35742e-06
KITLG	0.764165	4.09833e-05
C1QA	0.764209	0.00125095
CCL21	0.764573	0.00161824
EIF4G1	0.765806	0.00100779
NFATC1	0.765812	0.00024184
HPCAL1	0.766146	0.000105083
TNFRSF4	0.766241	0.00151093
CES1	0.766375	0.00771522
COL4A1	0.766514	0.036615
THBS4	0.767046	2.60915e-08
PRDX5	0.767341	0.000353285
CGREF1	0.767428	0.00445523
SAMD9L	0.767878	0.000568829
ACP5	0.768112	0.00543515
KLRB1	0.76819	0.00448158
CPA1	0.768756	6.43415e-09
SIGLEC10	0.769051	0.00059463
FAP	0.770005	0.014147
COMT	0.770248	0.000290767
DNAJB8	0.77055	0.000882896
PLXNA4	0.771064	0.00245643
CXADR	0.771374	0.00350322
VSTM2L	0.77241	0.000171989
DIABLO	0.772707	0.00199361
LACTB2	0.772899	0.00013425
DNAJA2	0.773034	0.000337751
CD79B	0.773275	0.000588928
DDC	0.774151	0.0149984
BLMH	0.774162	0.00022488
CD69	0.774298	0.000497069
RETN	0.774647	0.011026
MPIG6B	0.775265	0.0011037
LY9	0.775829	0.00122386
CRKL	0.776692	0.000329849
ICAM2	0.776764	0.000207369
ITGA11	0.777467	0.000918675
CCL15	0.77806	1.55568e-05
NT5C3A	0.778796	0.000415109
CASP2	0.778815	0.000147371
SCGB1A1	0.779143	0.000756947
LAIR1	0.779818	0.000386491
GAL	0.779874	0.00113513
MAP2K6	0.780698	0.000218741
ARHGEF12	0.78255	5.43745e-05
SPP1	0.782592	0.00431986
PGLYRP1	0.7826	0.00774406
WASF1	0.782855	0.000282296
NUDC	0.783073	3.76967e-05
WFIKKN2	0.783183	0.0159947
IL18	0.783401	0.000760031
CDSN	0.784165	0.000253012
LTBP2	0.784371	0.000684254
PPIB	0.784878	0.00152393
CORO1A	0.786446	0.0014765
ADA	0.787105	0.00541521
IL6R	0.787123	0.00037767
SIRPA	0.787519	3.1875e-05
PRSS2	0.787812	0.000951701
RAB37	0.78939	0.00027816
ADA2	0.790797	0.0102437
SPARCL1	0.790951	0.0059377
TIMD4	0.79097	4.48339e-05
ADAM23	0.791168	2.73443e-06
ATP5IF1	0.791245	0.00145269
DECR1	0.791782	3.41121e-05
DBNL	0.792489	0.000205423
MLN	0.792574	0.00398313
CCL16	0.792705	0.0157536
CLIP2	0.792875	0.000156275
GP1BA	0.792945	0.000122364
KIT	0.793504	0.00219548
PDLIM7	0.794144	0.000827956
IL7	0.794404	6.30631e-05
LRRN1	0.794406	0.00280323
DOK2	0.79494	9.28118e-08
IL19	0.795037	0.0010287
HSPB1	0.797341	0.000839619
SHMT1	0.797679	0.00116082
CASP3	0.798298	0.000130464
CD160	0.798478	0.00545765
SKAP2	0.800115	0.000474005
GYS1	0.80105	1.92335e-07
SUSD1	0.804095	0.00188765
PI3	0.806757	0.00484267
GP2	0.806874	0.0121164
MGMT	0.806925	0.000423296
PRKAR1A	0.807412	0.000498029
LY75	0.808345	0.00261237
NELL2	0.808777	0.00296273
CD70	0.809117	0.0132456
FABP4	0.811461	0.00262962
IL2RA	0.811891	0.000458954
VEGFD	0.812008	0.00192084
ANXA11	0.812874	0.001591
CNDP1	0.81397	0.00975025
AGER	0.815535	0.00559767
SSC5D	0.81641	0.00484837
EPO	0.819774	6.0423e-05
SPINK4	0.820235	0.000139053
REG3A	0.82025	0.0069944
OMD	0.820489	0.00137452
SCGB3A2	0.821286	0.000276727
CCL25	0.82166	0.0122654
SIRPB1	0.823121	0.000173358
TRAF2	0.823137	4.73606e-06
ICAM5	0.82399	0.000100458
TIE1	0.825954	0.00057422
SLAMF7	0.827227	0.00358395
CD40	0.827675	0.00133803
PON2	0.827837	0.00148209
BPIFB1	0.829051	6.31633e-06
TREM2	0.831091	0.000199849
TNFRSF10C	0.83231	0.00963929
GHRL	0.833427	0.00079191
FCAR	0.833703	0.00212724
IL18R1	0.835261	0.000182586
IL17RB	0.835862	0.00204183
IRAG2	0.838099	0.000512493
EPCAM	0.840682	0.00291957
CCL18	0.84193	0.00186407
CTRC	0.842179	0.000211569
CRTAC1	0.842726	0.001148
LEP	0.843733	0.00740192
FCRL2	0.845139	0.00144524
CST6	0.847079	0.001805
CXCL17	0.849507	0.000774524
PSPN	0.851352	0.000203002
CDHR5	0.852066	0.00372941
CD22	0.855925	0.00058735
SMPDL3A	0.859773	0.000359748
MEGF10	0.861957	0.00416664
PDGFRB	0.864469	0.000525194
COL1A1	0.86723	0.00427206
CTSH	0.867482	0.000208071
IL5RA	0.867904	0.00333158
MSMB	0.868944	0.000581057
CDH17	0.869611	0.000423558
CD6	0.874099	0.0042604
CST7	0.87971	0.000546832
DLK1	0.886017	7.0804e-05
CD200R1	0.893097	0.00166648
TPSAB1	0.893289	0.000411018
ICAM4	0.898027	0.00113539
PILRB	0.901498	1.15509e-05
FCN2	0.901898	0.00048614
ENPP5	0.902263	0.00456509
CR2	0.9029	0.00517134
CBLIF	0.903279	0.00298215
ENPP7	0.90368	0.00310218
UMOD	0.906418	0.000432677
CCL24	0.908095	0.00343549
SELE	0.91381	2.6943e-05
SFTPD	0.920547	0.00716207
MZB1	0.922601	5.76212e-06
CLUL1	0.92361	4.2235e-05
FCRL6	0.925056	0.000598211
CEACAM21	0.9276	0.00146308
FUCA1	0.929535	0.00112108
SSC4D	0.943743	0.00711508
FCGR2A	0.945379	4.74368e-05
TLR3	0.947747	0.00332479
MEP1B	0.948564	0.000989365
LILRB5	0.955538	0.000196674
COL9A1	0.957712	0.000384845
CHIT1	0.959927	0.00146306
PM20D1	0.972713	2.2848e-06
PNLIPRP2	0.985997	1.15616e-05

## Sheet: S6.limma_DAPs
Table S6. Differentially abundant proteins
Differentially abundant proteins (DAPs) were calculated by limma with covariate adjustment, comparing all pairs of phases
Columns: phase1_phase2 - phase pair; prot - gene name; logFC - log2 fold change of the difference in protein abundance in phase 2 vs phase 1; CI.L - left limit of confidence interval for logFC; CI.R - right limit of confidence interval for logFC; AveExpr - average log2-abundance of the protein;t - moderated t-statistic; P.Value - raw p-value; adj.P.Val - adjusted p-value; B - log-odds that the ge…
phase1_phase2	protein	logFC	CI.L	CI.R	AveExpr	t	P.Value	adj.P.Val	B	sign
O_LL	PROK1	1.3416	1.16864	1.51455	0.142528	15.2807	3.18825e-37	2.01179e-34	72.9393	TRUE
F_LL	PROK1	1.35966	1.17598	1.54334	0.214507	14.5954	1.84502e-33	1.16421e-30	64.4654	TRUE
O_EL	PROK1	0.73086	0.561396	0.900324	-0.00277189	8.48885	1.15306e-15	7.2758e-13	24.849	TRUE
F_EL	PROK1	0.743703	0.561163	0.926244	0.0354273	8.02412	3.98468e-14	2.51433e-11	21.544	TRUE
F_EL	REN	0.436347	0.327023	0.54567	-0.0777061	7.86092	1.13953e-13	3.5952e-11	20.5335	TRUE
F_O	CSF3	0.434789	0.318021	0.551556	0.142728	7.33152	2.76852e-12	1.74694e-09	17.419	TRUE
F_LL	REN	0.41602	0.29266	0.539381	-0.125858	6.64943	2.6692e-10	8.42133e-08	13.1047	TRUE
F_O	REN	0.386917	0.263207	0.510627	-0.0867692	6.15815	2.71917e-09	6.08604e-07	10.8715	TRUE
F_O	CHRDL2	0.347443	0.236151	0.458736	-0.0597899	6.14688	2.89352e-09	6.08604e-07	10.8137	TRUE
O_LL	TNFSF10	-0.213192	-0.28277	-0.143615	-0.00943666	-6.03613	5.98943e-09	1.88966e-06	10.1015	TRUE
O_LL	CSF3	-0.421537	-0.566966	-0.276109	0.192	-5.71007	3.34071e-08	7.02662e-06	8.45753	TRUE
F_EL	FAS	-0.176063	-0.237943	-0.114182	-0.0701991	-5.60377	5.54871e-08	1.16708e-05	8.00055	TRUE
O_EL	FAS	-0.160403	-0.22001	-0.100796	-0.0678646	-5.29691	2.36598e-07	5.46634e-05	6.6497	TRUE
O_EL	TNFSF10	-0.159766	-0.219352	-0.100179	-0.00384805	-5.27758	2.59889e-07	5.46634e-05	6.56191	TRUE
EL_LL	PROK1	0.605246	0.371591	0.8389	0.604192	5.10459	7.07806e-07	0.000446625	5.06066	TRUE
F_EL	CRLF1	0.175296	0.106172	0.244421	-0.0379923	4.99456	1.10806e-06	0.000174797	5.15873	TRUE
F_LL	TNFSF10	-0.182314	-0.25638	-0.108247	-0.0443948	-4.85338	2.41736e-06	0.000508451	4.40782	TRUE
F_LL	ACY1	-0.244447	-0.34691	-0.141983	-0.0606259	-4.70394	4.71333e-06	0.000743527	3.78936	TRUE
O_LL	SLC39A5	-0.358924	-0.510784	-0.207064	0.0811385	-4.65601	5.35268e-06	0.000782497	3.63859	TRUE
F_EL	TFPI	-0.151101	-0.215424	-0.0867788	-0.0473851	-4.6266	5.97204e-06	0.000753672	3.57577	TRUE
F_LL	ENTPD5	0.14473	0.08303	0.206429	-0.0180836	4.6251	6.66278e-06	0.000840843	3.45614	TRUE
O_LL	ADH4	-0.46597	-0.66584	-0.266101	0.0234893	-4.59269	7.08415e-06	0.000782497	3.37471	TRUE
O_LL	FAS	-0.134275	-0.192002	-0.0765486	-0.0455214	-4.5824	7.44054e-06	0.000782497	3.3326	TRUE
O_EL	CSF3	-0.300053	-0.429889	-0.170217	0.205795	-4.54884	7.99228e-06	0.00126078	3.35215	TRUE
O_LL	MMP7	0.150323	0.0849147	0.215731	-0.0326569	4.5274	9.42879e-06	0.000849938	3.10374	TRUE
F_LL	FAS	-0.149043	-0.213864	-0.0842218	-0.0446082	-4.53371	9.923e-06	0.00104357	3.08182	TRUE
F_EL	FST	0.234735	0.130776	0.338694	-0.0260678	4.44715	1.31211e-05	0.0013799	2.83363	TRUE
F_LL	CHRDL2	0.205573	0.114183	0.296963	-0.157408	4.43519	1.50678e-05	0.00135825	2.69696	TRUE
F_EL	MFAP5	0.17126	0.0940803	0.248439	-0.0383521	4.37029	1.82066e-05	0.00164119	2.52748	TRUE
O_LL	COL4A1	0.215386	0.11777	0.313002	0.000627941	4.34663	2.04713e-05	0.00161467	2.37343	TRUE
F_EL	IGFBP7	-0.130309	-0.189685	-0.0709329	-0.0242395	-4.32234	2.23064e-05	0.00175941	2.3362	TRUE
O_LL	CES1	-0.231079	-0.340909	-0.121249	-0.0908287	-4.14498	4.742e-05	0.00332467	1.60488	TRUE
F_LL	PLAUR	0.139505	0.0733222	0.205688	-0.041087	4.15627	4.77747e-05	0.00344341	1.6093	TRUE
F_LL	OSM	0.415681	0.218135	0.613226	-0.143692	4.14895	4.91136e-05	0.00344341	1.58492	TRUE
F_O	SPON2	0.125431	0.0630765	0.187786	0.0120876	3.96072	9.61114e-05	0.0151616	1.05678	TRUE
F_LL	IGFBP7	-0.118657	-0.178154	-0.0591602	0.00113389	-3.9323	0.00011545	0.00728492	0.774661	TRUE
F_LL	PROC	-0.134919	-0.203828	-0.0660097	-0.00849816	-3.8606	0.000152234	0.00803104	0.526402	TRUE
F_LL	CCL11	-0.174232	-0.263247	-0.0852185	0.0548278	-3.85938	0.00015273	0.00803104	0.518961	TRUE
O_EL	IGFBP2	-0.258921	-0.391929	-0.125913	-0.0485439	-3.83161	0.000156569	0.019759	0.598476	TRUE
F_EL	ENTPD5	0.113764	0.055187	0.172341	-0.0181808	3.82502	0.000165226	0.0109047	0.475532	TRUE
F_EL	TNFSF10	-0.123726	-0.187626	-0.0598261	-0.0316831	-3.81352	0.000172816	0.0109047	0.435875	TRUE
F_EL	CXCL8	-0.169444	-0.258248	-0.0806405	0.047822	-3.75811	0.000213522	0.0122484	0.242778	TRUE
O_LL	ACY1	-0.200742	-0.307039	-0.0944448	-0.0843826	-3.72025	0.000248177	0.0156599	0.0537716	TRUE
F_LL	COL4A1	0.158705	0.0746558	0.242754	0.0575178	3.72309	0.000254924	0.0123736	0.0550592	TRUE
F_EL	IGFBP2	-0.229863	-0.354044	-0.105682	-0.0743183	-3.64569	0.000324657	0.0162224	-0.139948	TRUE
F_LL	ADH4	-0.383655	-0.591443	-0.175866	-0.0509607	-3.64054	0.000345292	0.0152888	-0.222578	TRUE
F_EL	CLSTN2	-0.182293	-0.281387	-0.0831993	-0.02524	-3.62317	0.000352728	0.0162224	-0.214137	TRUE
F_EL	CHRDL2	0.173734	0.0791456	0.268322	-0.152446	3.61746	0.000359926	0.0162224	-0.236586	TRUE
F_LL	CES1	-0.220392	-0.340507	-0.100277	-0.0966757	-3.61801	0.000375598	0.0152888	-0.298913	TRUE
F_LL	IFNLR1	-0.19631	-0.303876	-0.0887443	0.00621656	-3.59855	0.000402548	0.0152888	-0.367452	TRUE
EL_LL	ACY1	-0.184543	-0.285928	-0.0831586	-0.0923134	-3.58698	0.000410812	0.129611	-0.182305	FALSE
F_LL	PRSS8	-0.160782	-0.249122	-0.072441	-0.0281756	-3.58901	0.000418016	0.0152888	-0.398156	TRUE
O_LL	FETUB	0.154025	0.068987	0.239063	-0.0554986	3.56815	0.000434776	0.0249404	-0.46892	TRUE
F_LL	REG3A	-0.195954	-0.304505	-0.0874029	-0.0222771	-3.55953	0.000463683	0.0152888	-0.50398	TRUE
F_LL	SLC39A5	-0.283992	-0.441373	-0.126611	0.0203804	-3.55795	0.000465331	0.0152888	-0.501274	TRUE
F_LL	MFAP5	0.148863	0.066103	0.231622	-0.0705792	3.54661	0.00048459	0.0152888	-0.542433	TRUE
F_LL	PTH1R	-0.113501	-0.177371	-0.0496302	-0.0223725	-3.50405	0.000564875	0.0160066	-0.663647	TRUE
F_LL	ANGPTL1	0.106564	0.0465689	0.16656	-0.0342212	3.50219	0.000567485	0.0160066	-0.689516	TRUE
F_LL	KYNU	-0.211298	-0.330526	-0.0920707	-0.0685768	-3.49434	0.000583441	0.0160066	-0.71911	TRUE
F_LL	QPCT	0.114308	0.0492721	0.179343	-0.0634648	3.46554	0.000645713	0.0169769	-0.795218	TRUE
F_O	OSM	0.31746	0.135601	0.499319	-0.158422	3.4371	0.000682618	0.0723766	-0.743769	FALSE
O_LL	IFNLR1	-0.160145	-0.251849	-0.0684414	-0.0122979	-3.44026	0.000686291	0.0360875	-0.872329	TRUE
F_EL	IFNLR1	-0.149411	-0.235045	-0.0637765	0.00272651	-3.43643	0.000690999	0.029068	-0.826131	TRUE
O_LL	GSTA1	-0.36025	-0.569318	-0.151182	0.11413	-3.39447	0.000805059	0.0390763	-1.03893	TRUE
F_O	LEP	0.296157	0.123765	0.468549	-0.138523	3.38253	0.000826765	0.0723766	-0.913414	FALSE
F_EL	LEP	0.288627	0.119925	0.457329	-0.132797	3.36956	0.000871957	0.0343878	-1.04084	TRUE
F_O	CRLF1	0.115941	0.048094	0.183788	-0.0692018	3.36468	0.000879773	0.0723766	-0.97474	FALSE
F_O	CST7	0.212149	0.0875728	0.336726	0.0777976	3.35343	0.000917612	0.0723766	-0.997537	FALSE
F_O	B4GALT1	0.110396	0.044598	0.176195	-0.0444651	3.30352	0.00108638	0.0731278	-1.16801	FALSE
O_LL	VEGFD	0.153541	0.0619302	0.245152	-0.0695295	3.30167	0.00110836	0.0480808	-1.3199	TRUE
O_LL	KYNU	-0.201492	-0.322039	-0.0809449	-0.0713946	-3.2928	0.00114297	0.0480808	-1.35261	TRUE
F_O	MMP7	-0.100678	-0.16103	-0.0403264	-0.0364005	-3.2846	0.00115892	0.0731278	-1.22263	FALSE
F_LL	CD276	0.136019	0.053685	0.218352	-0.0312099	3.25737	0.00131811	0.031369	-1.45071	TRUE
F_O	CXCL8	-0.163531	-0.262901	-0.0641599	0.0494128	-3.24031	0.0013473	0.0772862	-1.36493	FALSE
F_LL	CRLF1	0.133249	0.0523237	0.214175	-0.0738242	3.24657	0.00136656	0.031369	-1.49696	TRUE
F_LL	SSC4D	-0.460701	-0.741288	-0.180114	-0.0122266	-3.23742	0.00140891	0.031369	-1.5222	TRUE
F_LL	FETUB	0.134227	0.0524753	0.215979	-0.0422269	3.23735	0.00140924	0.031369	-1.50778	TRUE
F_LL	CXCL8	-0.172113	-0.277161	-0.0670645	0.0801403	-3.23051	0.00144168	0.031369	-1.54427	TRUE
O_LL	ENAH	0.160456	0.0623642	0.258548	0.0164222	3.22261	0.00144972	0.0571733	-1.57216	FALSE
F_LL	CXCL9	-0.225553	-0.364282	-0.0868234	0.0642237	-3.20592	0.00156641	0.0329468	-1.61683	TRUE
O_EL	COL4A1	0.148675	0.0569113	0.240438	-0.0153458	3.18903	0.00158621	0.153207	-1.51264	FALSE
O_LL	CTSO	-0.131863	-0.213193	-0.0505322	-0.0162746	-3.19399	0.00159301	0.0591286	-1.65767	FALSE
F_EL	PRSS8	-0.128144	-0.207347	-0.0489407	-0.0327113	-3.1868	0.00162556	0.0534543	-1.59908	FALSE
F_EL	CCL11	-0.144015	-0.233329	-0.0546999	0.0519855	-3.1757	0.0016825	0.0534543	-1.64961	FALSE
F_EL	AGRN	-0.0985466	-0.159675	-0.0374178	-0.0209347	-3.17512	0.0016865	0.0534543	-1.63768	FALSE
F_O	IGFBP7	-0.0870258	-0.141091	-0.0329608	0.00064269	-3.16935	0.00170723	0.0897721	-1.5727	FALSE
F_LL	REG1A	-0.152455	-0.247094	-0.0578164	0.0014818	-3.17657	0.00172656	0.0348522	-1.70514	TRUE
F_LL	TFPI	-0.120063	-0.19477	-0.0453556	-0.0198796	-3.16878	0.00176746	0.0348522	-1.71805	TRUE
F_EL	PROC	-0.107958	-0.175234	-0.0406814	-0.00629096	-3.1605	0.00176999	0.0534543	-1.69574	FALSE
F_EL	QPCT	0.0979577	0.0368819	0.159033	-0.064156	3.15883	0.00177899	0.0534543	-1.69376	FALSE
F_LL	FABP4	-0.199924	-0.325275	-0.0745723	-0.0140455	-3.1449	0.00191345	0.0365875	-1.78639	TRUE
O_EL	CHRDL2	-0.17813	-0.290572	-0.0656884	0.0162211	-3.11818	0.00200539	0.153207	-1.72613	FALSE
EL_LL	CES1	-0.171455	-0.280188	-0.0627218	-0.114298	-3.10759	0.00213398	0.415134	-1.50392	FALSE
O_EL	FST	0.148952	0.0537195	0.244185	-0.00169268	3.0786	0.00228195	0.153207	-1.83638	FALSE
F_EL	AGRP	-0.189622	-0.31089	-0.0683535	0.264438	-3.07962	0.00230407	0.0660849	-1.91072	FALSE
O_EL	TFPI	-0.0980141	-0.161057	-0.0349707	-0.069071	-3.06014	0.00242256	0.153207	-1.8945	FALSE
F_EL	REG3A	-0.160409	-0.263846	-0.0569711	-0.0194818	-3.05438	0.00250137	0.0677244	-1.99752	FALSE
F_O	LY6D	-0.0792916	-0.130495	-0.0280879	0.0490849	-3.04931	0.00253071	0.122837	-1.90537	FALSE
F_LL	LY6D	-0.0847803	-0.139501	-0.0300594	0.0729379	-3.0553	0.00255824	0.0463766	-2.02596	TRUE
F_LL	LEP	0.312142	0.110524	0.51376	-0.194237	3.0526	0.00257239	0.0463766	-2.0584	TRUE
F_EL	CD14	0.155104	0.0547865	0.255422	-0.0628865	3.04523	0.00257589	0.0677244	-2.03877	FALSE
O_EL	SLC39A5	-0.203045	-0.334722	-0.0713679	0.120608	-3.03511	0.00262599	0.153207	-1.95007	FALSE
EL_LL	HYAL1	0.0746598	0.0262945	0.123025	-0.0397821	3.04205	0.00263159	0.415134	-1.66654	FALSE
O_LL	PROC	-0.101038	-0.166602	-0.0354737	-0.0224744	-3.03587	0.00266552	0.0934411	-2.12404	FALSE
O_EL	PGF	-0.0792866	-0.130794	-0.0277796	0.0068785	-3.02993	0.00267081	0.153207	-1.96933	FALSE
O_LL	PLAUR	0.0982644	0.0341193	0.162409	-0.0314876	3.01785	0.00282288	0.0937495	-2.18208	FALSE
F_EL	CRHBP	-0.0998159	-0.165331	-0.034301	-0.0263737	-3.00065	0.00296662	0.0748776	-2.14553	FALSE
O_EL	IFNLR1	-0.113316	-0.188756	-0.037876	-0.0124063	-2.95661	0.00337187	0.177304	-2.16408	FALSE
F_EL	GDF15	0.0887552	0.0292301	0.14828	-0.0711675	2.93663	0.00362749	0.0880364	-2.33198	FALSE
F_O	NPPC	0.154507	0.0507989	0.258216	-0.0880717	2.93346	0.00364681	0.159524	-2.24081	FALSE
F_O	CTSZ	0.0983369	0.0320474	0.164626	-0.0178481	2.9209	0.00379217	0.159524	-2.26753	FALSE
O_LL	PGF	-0.0858409	-0.143739	-0.0279424	0.00950664	-2.92073	0.00382809	0.120776	-2.44356	FALSE
F_LL	REG1B	-0.178489	-0.298845	-0.0581333	0.0203486	-2.92435	0.00385028	0.0674868	-2.42824	FALSE
O_EL	TNFSF11	-0.199709	-0.335131	-0.0642865	-0.025605	-2.90268	0.00398815	0.193579	-2.32922	FALSE
F_LL	THOP1	-0.075689	-0.127132	-0.0242462	-0.0794908	-2.90104	0.00412954	0.0704253	-2.47594	FALSE
O_LL	TNFSF11	-0.211127	-0.355169	-0.0670855	-0.0198559	-2.88743	0.00424049	0.127417	-2.52765	FALSE
F_EL	CD70	0.165299	0.0513893	0.27921	-0.0709042	2.85802	0.00462223	0.105425	-2.54403	FALSE
F_EL	TNFSF12	-0.0876045	-0.148075	-0.0271336	-0.0446919	-2.85323	0.00469029	0.105425	-2.5649	FALSE
F_LL	GSTA1	-0.297697	-0.503416	-0.0919783	0.0521517	-2.8533	0.00477533	0.0792955	-2.61957	FALSE
O_EL	SERPINA11	-0.156595	-0.265331	-0.0478595	-0.0801884	-2.83464	0.00491502	0.221527	-2.52087	FALSE
F_EL	MMP10	-0.163642	-0.277229	-0.0500547	0.0419124	-2.83741	0.00492134	0.105425	-2.59034	FALSE
F_EL	OSM	0.286152	0.0867538	0.485549	-0.180228	2.82639	0.00508829	0.105425	-2.63089	FALSE
F_EL	GUSB	0.189407	0.0571485	0.321666	0.00385372	2.82052	0.00517938	0.105425	-2.64993	FALSE
F_LL	AGRP	-0.21929	-0.372725	-0.0658539	0.247285	-2.81798	0.00531081	0.0859262	-2.70623	FALSE
F_LL	QDPR	-0.148114	-0.252067	-0.044161	0.0915251	-2.80935	0.00544978	0.0859703	-2.73002	FALSE
O_LL	APOM	-0.0955651	-0.163075	-0.0280554	-0.00549055	-2.78862	0.00572012	0.160436	-2.81104	FALSE
O_EL	CLSTN2	-0.13829	-0.23605	-0.04053	-0.0336436	-2.78433	0.00572194	0.228394	-2.64425	FALSE
O_LL	ANGPTL1	0.0782448	0.0228235	0.133666	-0.0264708	2.78121	0.00584791	0.160436	-2.8297	FALSE
F_LL	CXCL6	-0.218504	-0.373474	-0.0635345	0.00738367	-2.78034	0.00594899	0.0915565	-2.81454	FALSE
F_O	ENTPD5	0.0808778	0.0233955	0.13836	-0.0308805	2.77034	0.00599627	0.236478	-2.68205	FALSE
O_EL	BOC	-0.071571	-0.122579	-0.0205632	-0.000128966	-2.7618	0.00612084	0.228394	-2.70353	FALSE
O_EL	ENAH	0.120332	0.0345228	0.206141	0.00145934	2.7604	0.00615326	0.228394	-2.70276	FALSE
O_LL	SPON2	-0.0901452	-0.154991	-0.025299	0.0244231	-2.73851	0.00663725	0.160682	-2.93183	FALSE
O_LL	BOC	-0.0832456	-0.143201	-0.0232906	0.00499597	-2.73522	0.00670188	0.160682	-2.94869	FALSE
O_LL	GP2	0.196272	0.0548553	0.337688	0.0142386	2.73409	0.00672403	0.160682	-2.94098	FALSE
O_LL	CD276	0.103392	0.0286897	0.178094	-0.0214854	2.72652	0.00687545	0.160682	-2.95942	FALSE
F_LL	IL32	-0.12881	-0.222199	-0.0354204	-0.0833094	-2.71956	0.00710377	0.106726	-2.97182	FALSE
O_EL	FASLG	-0.110249	-0.190338	-0.0301607	-0.0107311	-2.70955	0.0071446	0.24488	-2.84363	FALSE
O_LL	CCL11	-0.109048	-0.188239	-0.0298557	0.0241409	-2.71263	0.00716107	0.16138	-3.00156	FALSE
F_O	SERPINA11	0.143881	0.0390512	0.248711	-0.0670854	2.70244	0.00732815	0.267092	-2.8604	FALSE
O_EL	MFAP5	0.0862995	0.0233589	0.14924	-0.00704747	2.69879	0.00737358	0.24488	-2.86613	FALSE
O_LL	SLAMF7	0.185489	0.0499544	0.321023	-0.0937145	2.69608	0.00751761	0.163573	-3.03665	FALSE
F_O	CEP43	0.159689	0.0427649	0.276614	0.0464232	2.68911	0.00761911	0.267092	-2.89073	FALSE
F_EL	RETN	0.149028	0.039289	0.258766	-0.035854	2.67468	0.0079757	0.157271	-3.0495	FALSE
F_LL	LTBR	0.0919887	0.024275	0.159702	-0.0275835	2.67882	0.00800343	0.116786	-3.06174	FALSE
F_LL	CSF1	0.0837713	0.0218716	0.145671	-0.0514418	2.66849	0.00823847	0.116786	-3.09883	FALSE
F_O	PGF	0.0780436	0.0202935	0.135794	0.0034805	2.66091	0.00827087	0.27468	-2.97172	FALSE
F_LL	CD14	0.150982	0.0390926	0.262872	-0.0651154	2.66078	0.00842611	0.116786	-3.12749	FALSE
F_LL	FST	0.144567	0.0372839	0.251849	-0.0922673	2.65704	0.0085137	0.116786	-3.13256	FALSE
EL_LL	MMP7	0.0969074	0.0248659	0.168949	0.0129196	2.6508	0.00860375	0.994471	-2.59733	FALSE
F_LL	FAP	-0.100465	-0.17536	-0.0255697	-0.039435	-2.64489	0.00881143	0.118298	-3.1588	FALSE
F_EL	NRP1	-0.0789351	-0.137958	-0.0199116	-0.0569609	-2.63392	0.00896733	0.171466	-3.11657	FALSE
O_EL	PROC	-0.0830382	-0.145267	-0.0208094	-0.0182761	-2.62655	0.00909257	0.278223	-3.06027	FALSE
O_LL	PON2	-0.146115	-0.255757	-0.036474	-0.013149	-2.62535	0.00921767	0.193878	-3.23324	FALSE
O_EL	FETUB	0.106227	0.0264277	0.186026	-0.0619299	2.6202	0.00925939	0.278223	-3.07152	FALSE
F_LL	ENAH	0.120523	0.0296272	0.21142	0.0461619	2.61456	0.00961155	0.126352	-3.2434	FALSE
F_EL	SCGN	-0.141366	-0.248629	-0.0341028	-0.0672686	-2.59578	0.0100007	0.185602	-3.23533	FALSE
F_LL	CCL26	-0.174603	-0.307503	-0.0417029	0.163393	-2.59059	0.0102834	0.132425	-3.28249	FALSE
O_LL	PCOLCE	0.104739	0.0246849	0.184794	-0.0744559	2.57739	0.0105564	0.214873	-3.34646	FALSE
O_EL	EPHA1	-0.0980484	-0.173042	-0.0230552	-0.0123402	-2.57342	0.0105745	0.303295	-3.1859	FALSE
O_EL	CTSZ	-0.0909875	-0.161109	-0.0208656	-0.0153443	-2.55407	0.01117	0.306446	-3.22319	FALSE
F_LL	COL18A1	-0.0868845	-0.154036	-0.0197329	-0.0467349	-2.55113	0.0114744	0.144807	-3.39957	FALSE
F_LL	ERBB3	-0.0674561	-0.119869	-0.0150432	-0.0269429	-2.53771	0.011913	0.147332	-3.43728	FALSE
O_EL	CTSO	-0.0874405	-0.155624	-0.0192571	-0.0135095	-2.52425	0.0121384	0.319138	-3.30466	FALSE
F_LL	ESM1	0.127763	0.028221	0.227305	-0.0474868	2.53073	0.0121415	0.147332	-3.44437	FALSE
F_LL	MCFD2	0.106799	0.022849	0.190748	0.0266186	2.50838	0.0129117	0.153723	-3.49001	FALSE
O_EL	SPON2	-0.0787116	-0.140733	-0.0166899	0.0267324	-2.49797	0.013053	0.329458	-3.36981	FALSE
F_LL	GP2	0.192952	0.0403051	0.345599	0.0330606	2.49234	0.013491	0.155294	-3.53016	FALSE
F_LL	AOC3	-0.116211	-0.208189	-0.0242325	-0.0876313	-2.49134	0.0135359	0.155294	-3.52243	FALSE
F_LL	NPPC	0.146769	0.0300604	0.263478	-0.103212	2.47958	0.0139685	0.157395	-3.56323	FALSE
O_LL	AMBN	-0.16936	-0.304562	-0.0341576	-0.115333	-2.46764	0.0143032	0.282042	-3.61069	FALSE
F_LL	CD70	0.164647	0.0332344	0.29606	-0.0813319	2.47037	0.014322	0.158548	-3.5862	FALSE
F_EL	CD244	-0.101438	-0.182446	-0.0204294	-0.0650196	-2.46619	0.0143281	0.258315	-3.5463	FALSE
F_O	CSTB	-0.10027	-0.180615	-0.019925	-0.019884	-2.45725	0.0146421	0.46196	-3.45228	FALSE
F_LL	CTSO	-0.0991171	-0.178598	-0.0196359	-0.0349407	-2.45891	0.0147776	0.16077	-3.6199	FALSE
F_EL	ANGPTL1	0.068172	0.0134536	0.12289	-0.0457746	2.45374	0.0148211	0.259781	-3.57447	FALSE
F_LL	DPT	-0.0847028	-0.152974	-0.0164318	-0.0495066	-2.44629	0.0152852	0.163474	-3.64435	FALSE
O_EL	CTSC	-0.119287	-0.215715	-0.0228583	-0.000785118	-2.43489	0.0155086	0.374988	-3.52366	FALSE
F_LL	VEGFD	0.105258	0.019969	0.190547	-0.0378229	2.43337	0.0158251	0.164542	-3.66578	FALSE
F_LL	CCL16	-0.165312	-0.299367	-0.0312565	-0.102153	-2.43146	0.0159066	0.164542	-3.68799	FALSE
F_EL	ERBB3	-0.0556717	-0.101004	-0.0103392	-0.0303184	-2.41874	0.0162924	0.277852	-3.66417	FALSE
O_LL	EPHA1	-0.108236	-0.196551	-0.0199216	-0.00501742	-2.41432	0.0165177	0.315839	-3.74213	FALSE
F_LL	DCTPP1	-0.0890803	-0.161803	-0.0163572	-0.0610644	-2.41521	0.0166125	0.167229	-3.7167	FALSE
F_LL	REG4	-0.122728	-0.222998	-0.0224572	-0.0141169	-2.41333	0.0166964	0.167229	-3.72306	FALSE
O_EL	CD14	0.110236	0.0200341	0.200438	-0.0483414	2.4055	0.0167881	0.374988	-3.59357	FALSE
O_EL	TSHB	0.162898	0.0294191	0.296378	0.0816581	2.40212	0.0169387	0.374988	-3.58097	FALSE
F_LL	LGALS9	-0.0992834	-0.180783	-0.017784	-0.0130081	-2.40205	0.0172095	0.169675	-3.73811	FALSE
O_EL	KLRD1	-0.183217	-0.33375	-0.0326838	-0.0669958	-2.39566	0.017234	0.374988	-3.61475	FALSE
F_EL	FETUB	0.0917291	0.0160993	0.167359	-0.0519871	2.38875	0.0176486	0.285689	-3.71586	FALSE
F_EL	PGLYRP1	0.120017	0.0210576	0.218976	-0.0210304	2.38869	0.0176575	0.285689	-3.7355	FALSE
F_LL	ITGB1	-0.0489331	-0.0895091	-0.00835714	-0.0217963	-2.37811	0.0183487	0.178124	-3.75343	FALSE
F_O	DPT	-0.0769059	-0.141074	-0.0127378	-0.0587583	-2.35982	0.0190099	0.564862	-3.6922	FALSE
O_LL	IL1RN	0.122227	0.0197719	0.224682	0.0720621	2.35022	0.0195844	0.353012	-3.87867	FALSE
F_O	MMP10	-0.125484	-0.230783	-0.0201844	0.0385649	-2.34639	0.0196941	0.564862	-3.70225	FALSE
O_LL	FASLG	-0.10545	-0.194045	-0.016854	0.0036343	-2.34471	0.0198624	0.353012	-3.90215	FALSE
EL_LL	FABP4	-0.166695	-0.307025	-0.0263657	-0.0155072	-2.34098	0.0201202	0.994471	-3.25084	FALSE
O_LL	CHRDL2	-0.141643	-0.26105	-0.0222357	0.0444808	-2.33679	0.0202781	0.353012	-3.92751	FALSE
F_LL	XG	-0.0985847	-0.181733	-0.015436	-0.0506628	-2.33776	0.0203738	0.193804	-3.88563	FALSE
F_LL	ENTPD6	0.0615069	0.00951388	0.1135	-0.0652123	2.33259	0.0206547	0.193804	-3.88491	FALSE
O_LL	TSPAN1	-0.0869168	-0.160437	-0.013397	0.0665985	-2.32897	0.0206996	0.353012	-3.90792	FALSE
F_EL	WFIKKN2	-0.0856717	-0.15819	-0.0131531	-0.0399513	-2.32672	0.02078	0.327805	-3.87376	FALSE
O_EL	IL18BP	-0.0642009	-0.118559	-0.00984262	-0.0187286	-2.32477	0.02079	0.423384	-3.76197	FALSE
O_EL	SCGN	-0.116024	-0.214268	-0.0177792	-0.0808511	-2.32454	0.0208002	0.423384	-3.76818	FALSE
F_LL	MMP10	-0.142851	-0.263828	-0.0218732	0.0865983	-2.32822	0.0208854	0.193804	-3.87257	FALSE
F_O	TNFRSF13B	0.0941477	0.0137671	0.174528	-0.0138874	2.3062	0.0218724	0.585462	-3.80972	FALSE
F_LL	SCGN	-0.158883	-0.294684	-0.023081	-0.0443504	-2.30691	0.0220741	0.201866	-3.96873	FALSE
F_O	ROBO1	-0.0879688	-0.1633	-0.0126375	-0.0636083	-2.29928	0.022268	0.585462	-3.82802	FALSE
EL_LL	MVK	-0.15451	-0.287381	-0.0216391	0.023753	-2.29155	0.0228617	0.994471	-3.34438	FALSE
O_EL	BTN2A1	-0.0644524	-0.119982	-0.00892252	-0.0487008	-2.28457	0.0230714	0.45494	-3.8528	FALSE
F_LL	SLAMF7	0.163633	0.022702	0.304564	-0.064106	2.28934	0.0230886	0.208127	-3.99201	FALSE
F_EL	CANT1	0.0584767	0.00791123	0.109042	-0.0401787	2.27764	0.0235932	0.363105	-3.98343	FALSE
EL_LL	DCTPP1	-0.0816574	-0.152338	-0.0109763	-0.0487769	-2.27665	0.0237528	0.994471	-3.37626	FALSE
F_LL	TNFSF11	-0.175762	-0.328062	-0.0234618	-0.0518413	-2.27547	0.0239226	0.212608	-4.01264	FALSE
EL_LL	PLAUR	0.0711124	0.00943491	0.13279	-0.00824107	2.27207	0.0240324	0.994471	-3.38356	FALSE
O_LL	AOC3	-0.103192	-0.193059	-0.013324	-0.0912956	-2.26212	0.0245976	0.400578	-4.07322	FALSE
O_EL	ADH4	-0.235678	-0.441425	-0.0299317	0.0888939	-2.25465	0.0249127	0.47078	-3.92199	FALSE
O_LL	SSC4D	-0.327446	-0.613823	-0.0410685	-0.0803092	-2.25246	0.0252026	0.400578	-4.11429	FALSE
F_LL	C1QA	0.0882355	0.0110452	0.165426	-0.0399896	2.25386	0.025274	0.219123	-4.07406	FALSE
F_LL	GUSB	0.156959	0.0195756	0.294343	-0.0334831	2.25267	0.0253502	0.219123	-4.07728	FALSE
O_EL	GDF15	0.0717126	0.00891059	0.134515	-0.067437	2.24761	0.0253669	0.47078	-3.93436	FALSE
F_LL	CTSB	0.174703	0.0208002	0.328605	-0.0492855	2.23821	0.0262942	0.221604	-4.10801	FALSE
O_LL	CCL16	-0.135792	-0.25546	-0.0161245	-0.116671	-2.23539	0.0263172	0.400578	-4.1457	FALSE
F_EL	IGFBP6	0.0805044	0.00955523	0.151454	-0.0366578	2.23479	0.0263189	0.381448	-4.06021	FALSE
F_LL	CGREF1	0.136006	0.0161562	0.255855	0.00198624	2.23752	0.0263396	0.221604	-4.10615	FALSE
O_LL	TNFRSF11A	-0.0950593	-0.178964	-0.0111548	-0.0330587	-2.23199	0.026556	0.400578	-4.13438	FALSE
O_LL	BTN2A1	-0.069971	-0.131776	-0.00816582	-0.0387183	-2.23023	0.0266628	0.400578	-4.14413	FALSE
F_O	PEAR1	-0.066003	-0.124469	-0.00753697	-0.0305853	-2.22279	0.0270749	0.664617	-3.99264	FALSE
O_EL	CEBPB	-0.183735	-0.346809	-0.020661	-0.0264601	-2.21768	0.0273633	0.490836	-4.00725	FALSE
F_EL	PTH1R	-0.075632	-0.142823	-0.00844126	-0.0103855	-2.21706	0.0275301	0.381448	-4.08825	FALSE
F_LL	LAMP3	-0.118252	-0.223573	-0.0129307	0.00348217	-2.21393	0.0279581	0.232126	-4.14139	FALSE
O_EL	GAS6	-0.0809915	-0.153174	-0.00880869	-0.0493139	-2.2085	0.0280033	0.490836	-4.02959	FALSE
F_EL	CD276	0.0820417	0.00872902	0.155354	-0.0462784	2.204	0.0284363	0.381448	-4.12541	FALSE
EL_LL	KYNU	-0.123248	-0.233386	-0.0131103	-0.106464	-2.2052	0.0284583	0.994471	-3.51362	FALSE
F_O	ALCAM	-0.0527615	-0.0999278	-0.00559525	-0.0288172	-2.20262	0.0284903	0.664617	-4.02752	FALSE
F_EL	ALCAM	-0.0576827	-0.109289	-0.00607668	-0.0296978	-2.20146	0.0286218	0.381448	-4.14294	FALSE
F_EL	CKMT1A_CKMT1B	-0.0950053	-0.180057	-0.00995395	-0.0725753	-2.2	0.0287225	0.381448	-4.12236	FALSE
F_EL	CCL16	-0.135008	-0.256101	-0.0139154	-0.116063	-2.19583	0.0290237	0.381448	-4.15956	FALSE
O_EL	LGALS1	0.0662484	0.00666313	0.125834	-0.0345224	2.18841	0.0294496	0.492575	-4.06177	FALSE
F_EL	THPO	0.0747304	0.0075206	0.14194	-0.0094316	2.18988	0.0294574	0.381448	-4.16469	FALSE
F_LL	NRP1	-0.0795519	-0.151086	-0.00801727	-0.0500145	-2.19271	0.0294655	0.241464	-4.19113	FALSE
F_O	ACTA2	-0.084341	-0.160209	-0.00847296	-0.0104936	-2.18893	0.0294817	0.664617	-4.05959	FALSE
F_O	QPCT	0.0674666	0.00677377	0.128159	-0.0800357	2.18875	0.0294917	0.664617	-4.0636	FALSE
F_EL	ENPP2	-0.0795046	-0.151081	-0.00792834	-0.0501762	-2.18766	0.0296212	0.381448	-4.18298	FALSE
O_EL	CSTB	0.0795908	0.00790998	0.151272	-0.0190804	2.1855	0.0296638	0.492575	-4.05717	FALSE
EL_LL	EFEMP1	0.0738266	0.00732217	0.140331	-0.0149301	2.18759	0.0297351	0.994471	-3.54386	FALSE
O_LL	CD14	0.112697	0.0110426	0.214351	-0.0474177	2.18399	0.0299407	0.433632	-4.2556	FALSE
O_LL	PTH1R	-0.0791573	-0.150688	-0.00762649	-0.0356043	-2.18008	0.0302374	0.433632	-4.24309	FALSE
EL_LL	VEGFD	0.10043	0.00938376	0.191476	-0.0351021	2.17378	0.0307757	0.994471	-3.56508	FALSE
F_LL	APOM	-0.0803029	-0.153105	-0.0075008	-0.017436	-2.17487	0.0307962	0.249133	-4.25058	FALSE
F_EL	NPPC	0.112079	0.0103626	0.213795	-0.120942	2.17015	0.0309377	0.384936	-4.19187	FALSE
EL_LL	CANT1	-0.0585125	-0.111741	-0.00528417	-0.0386928	-2.16625	0.0313485	0.994471	-3.58629	FALSE
O_EL	PGLYRP1	0.102552	0.00919642	0.195908	-0.0234234	2.16226	0.0314337	0.508581	-4.12416	FALSE
F_EL	DPT	-0.0663564	-0.126821	-0.00589156	-0.0510469	-2.16141	0.031614	0.384936	-4.2169	FALSE
F_EL	FASLG	-0.0851405	-0.162785	-0.00749573	-0.0262088	-2.15964	0.0317524	0.384936	-4.21932	FALSE
O_LL	DCTPP1	-0.0804827	-0.154033	-0.00693292	-0.0558751	-2.15564	0.0321116	0.450276	-4.30939	FALSE
F_EL	COL4A1	0.0968459	0.008225	0.185467	0.0288034	2.15229	0.0323322	0.384936	-4.24231	FALSE
F_O	FABP4	-0.122962	-0.235713	-0.010212	0.0136267	-2.14737	0.0326786	0.679702	-4.1389	FALSE
F_O	CTSL	-0.0623388	-0.119664	-0.00501346	-0.0285371	-2.14116	0.0331741	0.679702	-4.14841	FALSE
F_O	CSF1	0.0654293	0.00518699	0.125672	-0.054077	2.13857	0.0333927	0.679702	-4.16044	FALSE
EL_LL	MAPK9	-0.0725603	-0.139383	-0.0057378	0.0500478	-2.13983	0.0334507	0.994471	-3.63016	FALSE
F_EL	PLAUR	0.0681821	0.0053081	0.131056	-0.0611977	2.13582	0.0336704	0.391028	-4.28077	FALSE
F_LL	CTSD	-0.0945671	-0.181794	-0.00734046	0.0109889	-2.13778	0.0337428	0.266639	-4.32079	FALSE
F_LL	SOST	-0.102342	-0.196919	-0.00776437	-0.141873	-2.13359	0.0340768	0.266639	-4.33982	FALSE
F_EL	IL6	0.201119	0.0152003	0.387037	0.135372	2.13057	0.0341056	0.391028	-4.28548	FALSE
O_LL	HYAL1	0.0548218	0.00406878	0.105575	-0.023504	2.12788	0.0343722	0.471497	-4.38161	FALSE
F_LL	SCG3	0.0884343	0.00657065	0.170298	0.0095468	2.12998	0.0343777	0.266639	-4.33059	FALSE
F_O	PRSS8	-0.079703	-0.153613	-0.0057935	-0.0061211	-2.12345	0.0346576	0.683405	-4.1935	FALSE
F_LL	OLR1	0.169736	0.0120143	0.327457	0.062185	2.12205	0.0350589	0.266639	-4.35452	FALSE
F_LL	TIMP3	-0.215721	-0.416189	-0.0152522	-0.0743944	-2.12174	0.0350729	0.266639	-4.35169	FALSE
F_EL	ENAH	0.082211	0.00572416	0.158698	0.0237808	2.11706	0.0352588	0.391028	-4.30444	FALSE
F_EL	LCN2	0.0878734	0.00608907	0.169658	-0.00896767	2.11618	0.0353227	0.391028	-4.32842	FALSE
O_EL	GP2	0.149695	0.00957029	0.289819	0.00347013	2.10273	0.0363638	0.566547	-4.24015	FALSE
O_LL	ANGPTL4	-0.116765	-0.226098	-0.00743241	-0.0503144	-2.10387	0.0364364	0.489178	-4.42605	FALSE
O_EL	KLRB1	-0.0814454	-0.157867	-0.00502333	-0.0401308	-2.09771	0.0368121	0.566547	-4.24603	FALSE
F_LL	CD160	-0.0866336	-0.167973	-0.00529432	-0.0111047	-2.10006	0.0369591	0.275164	-4.37735	FALSE
F_LL	CD244	-0.0965182	-0.18719	-0.00584634	-0.0489493	-2.09886	0.0370665	0.275164	-4.40183	FALSE
F_EL	B4GALT1	0.0683759	0.00406364	0.132688	-0.0715612	2.09395	0.0372724	0.405498	-4.36069	FALSE
F_LL	JCHAIN	-0.131089	-0.254782	-0.00739598	-0.0578756	-2.08962	0.0378984	0.275488	-4.41603	FALSE
F_LL	CCL25	-0.144067	-0.280081	-0.00805206	0.0419711	-2.08845	0.0380048	0.275488	-4.42914	FALSE
O_LL	DNAJB8	-0.116055	-0.22567	-0.006439	0.0245189	-2.08576	0.0380717	0.490435	-4.43124	FALSE
O_LL	NELL2	0.0710607	0.00393785	0.138184	-0.0149696	2.08552	0.0380845	0.490435	-4.46084	FALSE
F_O	CD70	0.125157	0.00691482	0.2434	-0.0886373	2.08411	0.038109	0.721194	-4.27351	FALSE
F_LL	CCL13	-0.142442	-0.277214	-0.00766874	-0.00474066	-2.08392	0.0384199	0.275488	-4.43691	FALSE
F_O	IGFBP6	0.0758222	0.00390907	0.147735	-0.0314759	2.07603	0.0388599	0.721194	-4.28066	FALSE
O_LL	AGRP	-0.144772	-0.282184	-0.00735909	0.212519	-2.07545	0.0390158	0.49238	-4.45762	FALSE
EL_LL	SCG3	0.0887445	0.0044653	0.173024	-0.00491394	2.07503	0.039127	0.994471	-3.74763	FALSE
F_EL	CXCL6	-0.143083	-0.279	-0.00716605	0.0136733	-2.07346	0.0391662	0.417626	-4.3978	FALSE
O_EL	CCL16	-0.110449	-0.215463	-0.00543593	-0.126516	-2.07019	0.0393329	0.59093	-4.30735	FALSE
F_LL	AGRN	-0.0821992	-0.160464	-0.00393451	-0.0024309	-2.07091	0.039639	0.281036	-4.45838	FALSE
F_EL	PEAR1	-0.0592584	-0.115706	-0.00281045	-0.0247768	-2.06756	0.0397109	0.417626	-4.42184	FALSE
F_O	GALNT3	0.118351	0.00513625	0.231566	0.00261934	2.05829	0.0405409	0.730894	-4.32304	FALSE
F_LL	LSP1	0.142339	0.006168	0.278509	0.00889592	2.06104	0.0405748	0.284474	-4.47858	FALSE
O_LL	TSHB	0.140636	0.00587208	0.2754	0.0556444	2.05579	0.0408908	0.49704	-4.49802	FALSE
O_LL	SHMT1	-0.212306	-0.415819	-0.00879365	0.154377	-2.05507	0.0409605	0.49704	-4.5071	FALSE
O_EL	ROBO1	0.0731863	0.00301619	0.143356	-0.0688429	2.05291	0.0409921	0.601536	-4.3436	FALSE
F_EL	ADAMTS13	-0.0572125	-0.112078	-0.0023471	-0.0214887	-2.05376	0.0410399	0.424528	-4.42997	FALSE
EL_LL	SLAMF7	0.145077	0.00572659	0.284427	-0.0313271	2.0516	0.0413725	0.994471	-3.78626	FALSE
F_EL	CSF3	0.137372	0.00484241	0.269901	-0.0359505	2.0415	0.0422553	0.43005	-4.47298	FALSE
F_O	MFAP5	0.0783783	0.00272209	0.154035	-0.0901645	2.03981	0.0423621	0.733804	-4.36723	FALSE
F_LL	WFIKKN2	-0.0858446	-0.168957	-0.00273217	-0.0288715	-2.03654	0.0429952	0.298131	-4.53287	FALSE
O_EL	GALNT3	-0.11101	-0.218716	-0.00330418	-0.000437483	-2.02869	0.0434176	0.617928	-4.38021	FALSE
F_O	COL1A1	0.104285	0.0030239	0.205546	-0.0149949	2.02776	0.0435859	0.733804	-4.38335	FALSE
O_LL	EPO	-0.235967	-0.465502	-0.00643143	0.242708	-2.02524	0.0439656	0.515722	-4.54297	FALSE
F_EL	SPON1	-0.0827198	-0.163192	-0.00224774	-0.0267673	-2.02451	0.0439809	0.440507	-4.50323	FALSE
F_LL	PRSS2	-0.109804	-0.216659	-0.00295012	0.0362203	-2.02628	0.0440579	0.30218	-4.55507	FALSE
O_EL	ANGPTL4	-0.102182	-0.201631	-0.00273274	-0.0583079	-2.02239	0.0440678	0.617928	-4.40952	FALSE
O_LL	SCGN	-0.124147	-0.245569	-0.00272369	-0.0639688	-2.01414	0.0451167	0.515722	-4.59894	FALSE
F_LL	DPP4	-0.0571998	-0.113176	-0.00122325	-1.65335e-05	-2.01481	0.0452441	0.306979	-4.5664	FALSE
O_LL	SERPINA11	-0.112731	-0.22324	-0.00222254	-0.0514714	-2.00957	0.0456022	0.515722	-4.59421	FALSE
O_LL	SPP1	-0.0996613	-0.197434	-0.00188877	-0.0280081	-2.00801	0.0457693	0.515722	-4.61017	FALSE
EL_LL	THOP1	-0.057539	-0.113991	-0.00108711	-0.0899685	-2.00857	0.0457844	0.994471	-3.86356	FALSE
O_EL	CST7	-0.121063	-0.239882	-0.00224381	0.11377	-2.00562	0.045856	0.618595	-4.41519	FALSE
O_EL	IL4R	-0.0953504	-0.189029	-0.00167158	-0.0241169	-2.00342	0.046076	0.618595	-4.43715	FALSE
F_EL	MSTN	-0.0883526	-0.175277	-0.00142815	-0.0259604	-2.00186	0.0463806	0.457284	-4.53729	FALSE
F_LL	ENPP2	-0.0751839	-0.149277	-0.00109031	-0.0404092	-2.00074	0.0467534	0.313844	-4.61157	FALSE
F_O	CD200	-0.0819857	-0.162884	-0.00108717	-0.0385945	-1.99542	0.0470212	0.733804	-4.44222	FALSE
F_O	CLC	-0.143983	-0.286168	-0.00179818	0.0281362	-1.99393	0.0471926	0.733804	-4.43976	FALSE
O_EL	CNDP1	0.0862325	0.00107427	0.171391	-0.147592	1.99313	0.0471979	0.620456	-4.45673	FALSE
F_O	CTSB	0.141591	0.00172526	0.281456	-0.0403205	1.99325	0.04726	0.733804	-4.45526	FALSE
F_LL	IL15	0.0710233	0.000834073	0.141213	-0.00897826	1.99516	0.0473639	0.314596	-4.60697	FALSE
F_O	NBN	0.123071	0.00105603	0.245085	-0.0578868	1.986	0.0480639	0.733804	-4.45576	FALSE
F_EL	TNFSF11	-0.155002	-0.308721	-0.00128261	-0.0525068	-1.98593	0.0481332	0.457767	-4.57269	FALSE
O_LL	MCFD2	0.0900229	0.000724085	0.179322	0.0294262	1.98593	0.0481856	0.533424	-4.65218	FALSE
F_LL	CKAP4	0.0701567	0.000314626	0.139999	-0.00555894	1.98061	0.0489865	0.318755	-4.64025	FALSE
F_EL	REG1B	-0.112102	-0.223708	-0.000495856	0.0444279	-1.97841	0.0489986	0.457767	-4.58488	FALSE
F_LL	TPP1	0.0763203	0.00033757	0.152303	-0.00246724	1.98048	0.0490003	0.318755	-4.63663	FALSE
EL_LL	ADH4	-0.247004	-0.493979	-2.8483e-05	-0.130282	-1.97085	0.0499738	0.994471	-3.93169	FALSE
F_O	ADAMTS13	-0.0518706	-0.103778	3.67304e-05	-0.0167867	-1.9676	0.0501612	0.733804	-4.4844	FALSE
O_LL	QDPR	-0.131706	-0.263551	0.000139713	0.0721236	-1.96786	0.0502413	0.546591	-4.68737	FALSE
F_EL	CD160	-0.0915854	-0.183324	0.000152977	-0.0180555	-1.96622	0.0503803	0.457767	-4.60654	FALSE
F_O	USP8	0.147299	-0.000424514	0.295023	0.0569905	1.96331	0.0506572	0.733804	-4.51314	FALSE
F_O	TNFRSF11A	0.0694493	-0.000355204	0.139254	-0.0291685	1.95908	0.0511686	0.733804	-4.50679	FALSE
F_EL	ITGB1	-0.0421906	-0.0846136	0.000232524	-0.0354972	-1.95886	0.0512591	0.457767	-4.60598	FALSE
O_EL	GSTA1	-0.188562	-0.378446	0.00132162	0.168278	-1.9546	0.0516052	0.664548	-4.53027	FALSE
F_LL	TIMP1	0.0569309	-0.000498946	0.114361	-0.0346347	1.95459	0.0520048	0.334847	-4.68981	FALSE
F_EL	TIMP1	0.0497694	-0.000513999	0.100053	-0.0349121	1.94937	0.0523699	0.457767	-4.64799	FALSE
F_O	IL15	0.0694771	-0.000790419	0.139745	-0.0116931	1.94682	0.0526142	0.737768	-4.54154	FALSE
F_LL	NTRK2	-0.0632885	-0.127443	0.00086595	-0.0529798	-1.94511	0.0531435	0.338723	-4.70897	FALSE
F_EL	IL1RL1	-0.125856	-0.253573	0.00186044	-0.0344592	-1.94081	0.0534055	0.457767	-4.65171	FALSE
EL_LL	IGFBP2	0.142458	-0.00227491	0.28719	-0.119911	1.93965	0.0536794	0.994471	-3.98042	FALSE
O_EL	CTSL	0.0546188	-0.000873957	0.110112	-0.0432905	1.93736	0.0536936	0.677614	-4.54739	FALSE
F_O	IL5RA	0.122592	-0.00201625	0.2472	0.012658	1.9371	0.0537962	0.737943	-4.56205	FALSE
F_EL	SSC4D	-0.258745	-0.52188	0.0043908	0.067779	-1.93664	0.0539169	0.457767	-4.67274	FALSE
F_EL	TGM2	-0.145622	-0.293759	0.00251422	0.101524	-1.93611	0.0539861	0.457767	-4.65309	FALSE
F_EL	SLC39A5	-0.135108	-0.272592	0.00237606	0.0766209	-1.93546	0.0540615	0.457767	-4.65822	FALSE
F_EL	CCL17	-0.141513	-0.285676	0.00265042	0.0385128	-1.93333	0.0543295	0.457767	-4.67781	FALSE
F_EL	CTSO	-0.0620283	-0.125368	0.00131136	-0.0283297	-1.92876	0.0548973	0.457767	-4.67713	FALSE
O_LL	PRSS8	-0.0752711	-0.15214	0.00159814	-0.073323	-1.92908	0.0549167	0.587329	-4.75377	FALSE
F_EL	CSF1	0.0576162	-0.0014118	0.116644	-0.0610732	1.92243	0.0556925	0.457767	-4.6933	FALSE
F_EL	GP2	0.153204	-0.00386414	0.310272	0.0173028	1.92105	0.0558632	0.457767	-4.70166	FALSE
EL_LL	TIA1	-0.0488194	-0.098887	0.00124829	0.0127491	-1.92158	0.0559398	0.994471	-4.00422	FALSE
F_LL	ADA	-0.0960908	-0.194854	0.0026723	0.0173932	-1.91837	0.0564673	0.354883	-4.75747	FALSE
F_LL	MMP1	-0.165105	-0.335249	0.00503914	-0.00487376	-1.91333	0.0571137	0.354883	-4.75822	FALSE
F_EL	TNFRSF10C	0.109227	-0.00339098	0.221846	-0.123812	1.9102	0.0572521	0.457767	-4.71205	FALSE
F_EL	LY6D	-0.0532357	-0.108138	0.00166628	0.0578911	-1.91	0.0573116	0.457767	-4.68545	FALSE
F_LL	TFF2	-0.103619	-0.210819	0.00358047	-0.0315821	-1.90587	0.0580807	0.354883	-4.78037	FALSE
F_LL	IL5RA	0.137316	-0.00493452	0.279566	0.0103619	1.90333	0.0584133	0.354883	-4.78288	FALSE
F_O	IL6ST	-0.042544	-0.0866208	0.0015328	-0.0324863	-1.90049	0.0584547	0.784785	-4.63393	FALSE
F_LL	CCL21	-0.105428	-0.214679	0.00382278	0.0351452	-1.90279	0.058491	0.354883	-4.76482	FALSE
O_LL	ANGPTL3	-0.0832462	-0.169588	0.00309551	-0.00670737	-1.89933	0.0587273	0.617615	-4.81601	FALSE
F_LL	RETN	0.116253	-0.00458439	0.237091	-0.0613967	1.89698	0.0592584	0.356115	-4.80371	FALSE
F_EL	TIA1	0.043952	-0.00179001	0.0896941	0.020243	1.8925	0.0595889	0.461187	-4.73789	FALSE
F_O	ENTPD6	0.0560836	-0.00232646	0.114494	-0.0686603	1.89067	0.0597765	0.785812	-4.63536	FALSE
EL_LL	LIFR	0.0636911	-0.00270345	0.130086	-0.0491735	1.89038	0.0599991	0.994471	-4.06048	FALSE
O_EL	PCOLCE	0.0701072	-0.00305044	0.143265	-0.0762873	1.88623	0.0602781	0.741869	-4.65438	FALSE
F_EL	LTBR	0.0529721	-0.0023777	0.108322	-0.0436522	1.88501	0.0606031	0.461187	-4.74676	FALSE
F_EL	REG1A	-0.0834211	-0.170781	0.0039385	0.0193722	-1.88086	0.0611729	0.461187	-4.77069	FALSE
O_LL	CXCL6	-0.161603	-0.330953	0.00774804	-0.0209237	-1.87995	0.0613489	0.63461	-4.84797	FALSE
F_EL	CLEC4A	0.0707941	-0.00344883	0.145037	-0.0372253	1.87801	0.0615439	0.461187	-4.75415	FALSE
O_EL	CCL11	-0.0777223	-0.159252	0.00380758	0.0266066	-1.87638	0.0616225	0.741869	-4.67011	FALSE
F_EL	C2	0.0571919	-0.00292895	0.117313	-0.0186407	1.87359	0.0621588	0.461187	-4.79439	FALSE
F_LL	CD4	-0.0566	-0.116121	0.00292102	0.021961	-1.87502	0.0622342	0.370469	-4.81355	FALSE
O_EL	AGRN	-0.0522198	-0.107144	0.00270432	-0.0446406	-1.87147	0.0623123	0.741869	-4.67109	FALSE
F_EL	AXL	-0.0590737	-0.121298	0.00315072	-0.0064328	-1.86978	0.0626841	0.461187	-4.79212	FALSE
F_EL	ADGRE5	-0.0689351	-0.141595	0.00372449	-0.0370513	-1.86855	0.0628559	0.461187	-4.80576	FALSE
O_LL	LTBR	0.0543573	-0.0030465	0.111761	-0.0275272	1.86553	0.0633503	0.644742	-4.85806	FALSE
F_LL	SPARCL1	-0.0793598	-0.163252	0.00453275	-0.0189675	-1.86519	0.0635982	0.375051	-4.86172	FALSE
F_EL	KLRB1	-0.0726227	-0.14939	0.004145	-0.0400157	-1.8632	0.0636123	0.461372	-4.7979	FALSE
O_EL	PON2	-0.0826701	-0.170417	0.00507668	0.0102097	-1.85445	0.0647085	0.756131	-4.70798	FALSE
O_LL	CXCL9	-0.136037	-0.280733	0.00865843	0.0481038	-1.85215	0.0652491	0.653527	-4.89748	FALSE
F_O	CRHBP	-0.0646274	-0.133409	0.00415415	-0.00926789	-1.85005	0.065421	0.788159	-4.70923	FALSE
EL_LL	SLC39A5	-0.145006	-0.299445	0.00943379	-0.0431711	-1.85025	0.0655961	0.994471	-4.12025	FALSE
F_O	LTBR	0.0483949	-0.00317335	0.0999632	-0.0600665	1.84793	0.0657448	0.788159	-4.70351	FALSE
F_O	IL1RL2	-0.0826753	-0.170869	0.00551843	-0.000146155	-1.84576	0.066043	0.788159	-4.70516	FALSE
F_LL	CD6	-0.109791	-0.227003	0.00742149	-0.0447423	-1.84688	0.0662205	0.3869	-4.87996	FALSE
O_EL	AGRP	-0.110574	-0.228668	0.00752035	0.233166	-1.84296	0.0663709	0.758826	-4.71685	FALSE
F_O	GUSB	0.112512	-0.00800203	0.233026	-0.0354281	1.83823	0.0671492	0.788159	-4.73732	FALSE
O_EL	CANT1	0.0424861	-0.00305277	0.088025	-0.038806	1.83635	0.0673443	0.758826	-4.74738	FALSE
F_O	TFF2	-0.0920302	-0.190703	0.00664276	-0.0498259	-1.83644	0.0674174	0.788159	-4.75217	FALSE
F_O	TNFAIP8	0.123922	-0.00896015	0.256805	-0.0148022	1.8362	0.0674494	0.788159	-4.72493	FALSE
F_LL	SIGLEC7	-0.0649807	-0.134725	0.00476333	0.000530457	-1.83706	0.0676636	0.391704	-4.9	FALSE
O_LL	THOP1	-0.0539536	-0.111971	0.00406416	-0.0856448	-1.83196	0.068204	0.657677	-4.93618	FALSE
F_EL	IL32	-0.0841844	-0.174772	0.00640355	-0.0854472	-1.83028	0.068399	0.487242	-4.86635	FALSE
F_EL	TFF2	-0.0903076	-0.187599	0.0069841	-0.0498185	-1.82812	0.0687235	0.487242	-4.86894	FALSE
O_LL	CCL25	-0.105519	-0.219496	0.00845898	0.0165398	-1.82375	0.0694404	0.657677	-4.94791	FALSE
EL_LL	CGREF1	0.114586	-0.009275	0.238446	0.00996529	1.82306	0.0696291	0.994471	-4.17137	FALSE
O_LL	ENTPD5	0.0581918	-0.00473344	0.121117	0.0281452	1.82177	0.069742	0.657677	-4.94769	FALSE
EL_LL	LGALS1	-0.0647111	-0.134697	0.00527514	-0.0241718	-1.82209	0.0697765	0.994471	-4.1729	FALSE
O_LL	GGH	-0.0835878	-0.174004	0.0068287	-0.00129377	-1.82117	0.0698326	0.657677	-4.94253	FALSE
F_EL	COL18A1	-0.047459	-0.098879	0.00396087	-0.033724	-1.81779	0.0702934	0.492835	-4.88019	FALSE
F_LL	CLSTN2	-0.101023	-0.210593	0.00854819	0.0255736	-1.81801	0.0705523	0.404713	-4.92985	FALSE
F_EL	NPTXR	0.070011	-0.00616211	0.146184	-0.0702367	1.81018	0.0714695	0.495574	-4.88771	FALSE
O_LL	MFAP5	0.0664978	-0.00586123	0.138857	-0.0284898	1.81038	0.071494	0.663422	-4.96687	FALSE
F_O	MEPE	0.0455589	-0.00409614	0.095214	-0.0603517	1.80657	0.0719686	0.793012	-4.78472	FALSE
O_LL	CDON	-0.061468	-0.128621	0.00568517	-0.0452296	-1.80325	0.07262	0.664104	-4.97682	FALSE
EL_LL	PLIN3	-0.0874975	-0.183252	0.00825701	0.0456196	-1.80069	0.0730978	0.994471	-4.20653	FALSE
F_EL	LAMP3	-0.0957815	-0.200922	0.0093594	-0.0230939	-1.79425	0.0739914	0.507484	-4.91595	FALSE
F_LL	HYAL1	0.03966	-0.00389082	0.0832109	-0.0145999	1.79557	0.0740507	0.41818	-4.96782	FALSE
F_O	REG3A	-0.106254	-0.222939	0.0104318	-0.00998193	-1.79303	0.0741225	0.793012	-4.8215	FALSE
O_LL	LGALS9	-0.0644263	-0.135254	0.00640146	-0.0242937	-1.79198	0.0744128	0.668806	-4.98919	FALSE
F_LL	SEMA7A	0.0695117	-0.00709354	0.146117	-0.0304595	1.78915	0.075083	0.41818	-4.98376	FALSE
O_LL	CNDP1	0.0822323	-0.00843379	0.172898	-0.150322	1.78671	0.0752539	0.668806	-5.01121	FALSE
O_EL	NECTIN2	-0.0519576	-0.109265	0.00534986	-0.00556733	-1.78455	0.0753947	0.834633	-4.83366	FALSE
F_LL	CXCL5	-0.220547	-0.464081	0.022987	0.127531	-1.78562	0.0756552	0.41818	-4.98392	FALSE
F_O	PLA2G1B	-0.0792615	-0.166869	0.00834598	-0.0322709	-1.78142	0.0759944	0.793012	-4.84444	FALSE
EL_LL	LGALS3	-0.0765498	-0.161303	0.00820364	-0.0616776	-1.77988	0.0764531	0.994471	-4.22791	FALSE
F_EL	LGALS9	-0.0636801	-0.134214	0.00685423	-0.000746739	-1.77818	0.0765993	0.519722	-4.92926	FALSE
F_LL	EPHB4	0.0622847	-0.00672653	0.131296	-0.0281507	1.77954	0.076648	0.41818	-5.00249	FALSE
F_LL	CXCL17	-0.0825227	-0.174027	0.00898179	-0.189866	-1.77829	0.0768682	0.41818	-5.0084	FALSE
F_LL	CDON	-0.0679798	-0.14336	0.00740067	-0.0323699	-1.7782	0.0768762	0.41818	-4.99359	FALSE
O_EL	GGH	-0.0767561	-0.161877	0.0083652	-0.00227507	-1.77487	0.0769842	0.837535	-4.84363	FALSE
F_LL	IL17A	-0.176085	-0.37212	0.0199489	-0.066028	-1.77113	0.0780477	0.418553	-5.00587	FALSE
EL_LL	TNFSF12	0.057763	-0.00663026	0.122156	-0.0642404	1.76772	0.0784711	0.994471	-4.25109	FALSE
F_LL	DNAJB8	-0.0909557	-0.192476	0.0105643	0.0145924	-1.76665	0.0788054	0.418553	-4.99423	FALSE
F_LL	TSPAN1	-0.0749424	-0.158625	0.00874003	0.0519483	-1.76579	0.0789347	0.418553	-5.01661	FALSE
F_EL	MEGF10	-0.079009	-0.16726	0.00924156	0.0578566	-1.76326	0.0790793	0.527465	-4.97942	FALSE
F_EL	CCL13	-0.109285	-0.23149	0.0129193	-0.00637331	-1.76129	0.0794124	0.527465	-4.98645	FALSE
O_LL	MVK	-0.127787	-0.270847	0.0152726	0.00786145	-1.75965	0.0797488	0.681393	-5.04801	FALSE
F_O	AXL	-0.0510438	-0.108227	0.00613924	-0.000265816	-1.75757	0.0799757	0.793012	-4.88251	FALSE
O_LL	JCHAIN	-0.116773	-0.247671	0.0141254	-0.0621328	-1.75737	0.0801364	0.681393	-5.06112	FALSE
O_LL	CTSD	-0.0749723	-0.15912	0.00917534	-0.00297455	-1.7553	0.080512	0.681393	-5.06775	FALSE
F_O	CCDC80	0.0684606	-0.00840309	0.145324	-0.0402406	1.75371	0.0806376	0.793012	-4.8827	FALSE
F_O	ERBB3	-0.038518	-0.0817883	0.00475222	-0.0220069	-1.75275	0.0808067	0.793012	-4.88603	FALSE
O_LL	F9	-0.0469284	-0.0997122	0.00585547	-0.0119646	-1.75142	0.0811581	0.681393	-5.06915	FALSE
F_LL	BACH1	0.160499	-0.0205276	0.341526	0.145052	1.74814	0.0819523	0.430185	-5.05243	FALSE
O_EL	MMP7	0.0493058	-0.00635387	0.104965	-0.0564773	1.74361	0.082303	0.880223	-4.89805	FALSE
F_LL	COL1A1	0.0965519	-0.0125423	0.205646	-0.0251121	1.74504	0.0824919	0.430185	-5.05038	FALSE
O_LL	SCG3	0.0697607	-0.00911925	0.148641	0.016802	1.74221	0.0827602	0.681393	-5.08343	FALSE
EL_LL	CD4	-0.0605042	-0.128958	0.00794928	0.0301771	-1.74182	0.0829198	0.994471	-4.29541	FALSE
O_LL	REG1A	-0.0796536	-0.169835	0.0105282	-0.0215401	-1.74008	0.0831494	0.681393	-5.09744	FALSE
EL_LL	CD84	0.0910527	-0.0121606	0.194266	-0.106325	1.73848	0.083507	0.994471	-4.293	FALSE
F_O	REG1A	-0.0688032	-0.146826	0.00921953	0.0233428	-1.73642	0.0836698	0.793012	-4.91093	FALSE
F_O	CEBPB	0.150654	-0.0202631	0.321572	-0.00983244	1.73553	0.0838097	0.793012	-4.92293	FALSE
F_EL	CCL26	-0.104809	-0.223768	0.0141507	0.198909	-1.73529	0.0839321	0.544199	-4.99683	FALSE
F_EL	CD93	-0.0521494	-0.111443	0.00714409	-0.049899	-1.7322	0.0844713	0.544199	-5.02073	FALSE
F_EL	CCL25	-0.116819	-0.249661	0.0160238	0.0398794	-1.73194	0.084519	0.544199	-5.03687	FALSE
F_LL	NCF2	0.222386	-0.0306788	0.47545	0.0555947	1.73269	0.0846696	0.437922	-5.08834	FALSE
F_O	C1QA	0.0595891	-0.0082899	0.127468	-0.0461429	1.7285	0.0850646	0.793012	-4.92205	FALSE
F_O	CTSC	0.0777048	-0.0108845	0.166294	0.0113568	1.72705	0.0853253	0.793012	-4.93534	FALSE
O_EL	TNFRSF11A	-0.0623946	-0.133569	0.0087803	-0.0315769	-1.72557	0.0855183	0.890357	-4.92678	FALSE
EL_LL	IL15	0.0661415	-0.00941684	0.1417	-0.000512532	1.72506	0.0859026	0.994471	-4.31878	FALSE
O_EL	EPO	-0.172923	-0.370531	0.0246856	0.219261	-1.72252	0.0860725	0.890357	-4.91071	FALSE
F_O	EGFR	-0.0479539	-0.102803	0.00689493	-0.0331158	-1.72145	0.0863373	0.793012	-4.95037	FALSE
F_EL	PCDH17	0.0752424	-0.0110284	0.161513	-0.0686825	1.71773	0.0870844	0.552623	-5.06277	FALSE
F_EL	CCL27	-0.0807837	-0.173555	0.0119871	-0.0751938	-1.71509	0.087579	0.552623	-5.04726	FALSE
F_O	FST	0.0793939	-0.0117965	0.170584	-0.108931	1.71429	0.0876508	0.793012	-4.94794	FALSE
EL_LL	CDHR5	-0.090072	-0.19368	0.0135361	-0.0262176	-1.71317	0.0880671	0.994471	-4.33848	FALSE
O_EL	CXCL10	0.100958	-0.0152071	0.217124	-0.0092379	1.71071	0.0882315	0.891476	-4.94038	FALSE
F_LL	SPON1	-0.067951	-0.146282	0.0103805	-0.00758259	-1.71043	0.0887144	0.453308	-5.11714	FALSE
F_EL	CRIM1	-0.0493341	-0.10624	0.00757137	-0.0302534	-1.70749	0.088978	0.552623	-5.07567	FALSE
F_O	CCL24	-0.190299	-0.409812	0.0292138	0.129937	-1.70692	0.0890084	0.793012	-4.96664	FALSE
F_EL	FGF19	-0.164177	-0.353759	0.0254058	-0.055122	-1.70557	0.0893305	0.552623	-5.07575	FALSE
O_EL	OSMR	-0.0399872	-0.0861757	0.00620126	-0.0385421	-1.70406	0.0894603	0.891476	-4.97179	FALSE
F_LL	NELL2	0.0570966	-0.00889773	0.123091	0.0058392	1.70589	0.0895596	0.453308	-5.12843	FALSE
F_LL	B4GALT1	0.0630958	-0.0098876	0.136079	-0.0764342	1.7046	0.0897996	0.453308	-5.12502	FALSE
F_O	PSPN	0.205845	-0.032943	0.444633	0.0689846	1.69733	0.0908098	0.793012	-4.9842	FALSE
O_LL	IL32	-0.0795788	-0.171941	0.012783	-0.109095	-1.69731	0.0909417	0.720093	-5.16842	FALSE
F_O	ENG	-0.0434511	-0.0939049	0.00700279	-0.0578514	-1.69571	0.0911209	0.793012	-4.9831	FALSE
O_LL	TNFRSF13B	-0.0755766	-0.163377	0.0122234	-0.00386631	-1.6957	0.0912472	0.720093	-5.17282	FALSE
O_LL	ICAM2	0.0705052	-0.0114155	0.152426	-0.0401334	1.69544	0.0912955	0.720093	-5.17371	FALSE
O_EL	GHRL	0.114996	-0.0186023	0.248593	-0.0979744	1.69423	0.0913107	0.891476	-4.97403	FALSE
F_LL	KRT19	-0.147726	-0.31999	0.0245377	0.00508811	-1.69092	0.0923957	0.459672	-5.15584	FALSE
F_O	SPON1	-0.0668219	-0.144735	0.0110915	-0.0129185	-1.68867	0.0924602	0.793012	-4.99268	FALSE
F_LL	THPO	0.0600646	-0.0100028	0.130132	-0.0206653	1.69024	0.0925173	0.459672	-5.14496	FALSE
O_EL	ADA2	-0.0773407	-0.167579	0.0128973	-0.0421209	-1.68698	0.0926983	0.891476	-4.99171	FALSE
F_O	EPO	0.185553	-0.0312338	0.40234	0.242121	1.68531	0.0931108	0.793012	-4.97587	FALSE
O_EL	IL15	-0.0614731	-0.133318	0.010372	-0.00485006	-1.68417	0.0932447	0.891476	-5.00263	FALSE
F_O	SLITRK6	0.0664044	-0.0112634	0.144072	-0.0344994	1.68348	0.0934693	0.793012	-4.99176	FALSE
F_EL	CLTA	-0.102861	-0.22329	0.0175693	0.000889847	-1.68221	0.0937827	0.567128	-5.10981	FALSE
F_EL	CTSB	0.128098	-0.0222531	0.27845	-0.0508225	1.678	0.0945969	0.567128	-5.1231	FALSE
F_O	ADGRG2	-0.0391247	-0.0850822	0.00683292	-0.00893693	-1.67622	0.0948753	0.793012	-5.01171	FALSE
F_EL	ADA	-0.0797907	-0.173561	0.0139797	0.0124179	-1.67588	0.0950123	0.567128	-5.12992	FALSE
F_EL	COLEC12	0.0436003	-0.00769688	0.0948975	-0.0231631	1.67399	0.095384	0.567128	-5.11691	FALSE
O_LL	COL18A1	-0.0543802	-0.118458	0.00969768	-0.0566692	-1.67182	0.095871	0.732353	-5.21604	FALSE
O_EL	LEPR	0.0523597	-0.00933193	0.114051	-0.0293173	1.67061	0.0959011	0.899141	-5.01759	FALSE
O_LL	IGFBP2	-0.11621	-0.25316	0.0207399	0.0367602	-1.67162	0.09591	0.732353	-5.20599	FALSE
O_LL	TFPI	-0.0636702	-0.138867	0.0115269	-0.049801	-1.66798	0.0966311	0.732353	-5.22329	FALSE
F_O	FAP	-0.0562769	-0.122863	0.0103092	-0.0292679	-1.66412	0.0972717	0.793012	-5.02343	FALSE
F_O	AGRN	-0.0509	-0.111156	0.00935586	0.00197807	-1.6633	0.0974439	0.793012	-5.02663	FALSE
F_LL	IL1RL1	-0.128722	-0.281217	0.0237722	-0.0153598	-1.66435	0.0975852	0.481065	-5.18896	FALSE
F_O	THPO	0.0568227	-0.0104813	0.124127	-0.0094607	1.66236	0.0976276	0.793012	-5.03147	FALSE
F_O	TNFSF12	-0.0466911	-0.10202	0.00863784	-0.0199532	-1.66157	0.0977818	0.793012	-5.03392	FALSE
F_O	XG	-0.059146	-0.129285	0.0109934	-0.0556112	-1.66035	0.0980268	0.793012	-5.03947	FALSE
O_EL	CRLF1	0.0541634	-0.0101554	0.118482	0.00804056	1.65752	0.0985111	0.899141	-5.05085	FALSE
O_LL	REG1B	-0.0897163	-0.196283	0.0168507	0.00024487	-1.65857	0.0985336	0.732353	-5.21475	FALSE
O_EL	IL18	-0.0797408	-0.174471	0.0149897	0.00186246	-1.65685	0.0986479	0.899141	-5.04956	FALSE
F_EL	KLRD1	-0.119064	-0.260539	0.0224115	-0.102212	-1.65751	0.0986717	0.567128	-5.15422	FALSE
F_EL	NBN	0.107566	-0.0204159	0.235548	-0.0652635	1.65532	0.099114	0.567128	-5.14248	FALSE
O_LL	CTRC	0.119353	-0.0228349	0.261541	-0.0801159	1.65358	0.0995265	0.732353	-5.22255	FALSE
F_LL	CCL18	-0.137687	-0.301818	0.0264441	-0.0188203	-1.6541	0.0996615	0.487326	-5.21344	FALSE
EL_LL	MATN2	0.0374685	-0.00724576	0.0821829	-0.03169	1.65129	0.100082	0.994471	-4.41491	FALSE
F_EL	ROR1	-0.0628661	-0.137881	0.0121489	-0.0528225	-1.65057	0.100088	0.567128	-5.15566	FALSE
O_LL	EDIL3	0.085701	-0.0165703	0.187972	-0.0200549	1.65077	0.1001	0.732353	-5.23958	FALSE
F_O	RNASET2	0.0523681	-0.0101427	0.114879	-0.0208248	1.64949	0.100233	0.800597	-5.06163	FALSE
O_EL	ADAM23	-0.06535	-0.143352	0.0126517	-0.0519025	-1.64905	0.100237	0.899141	-5.05525	FALSE
F_LL	CCL17	-0.141766	-0.311217	0.0276848	0.0724222	-1.64963	0.100573	0.487326	-5.21378	FALSE
EL_LL	CDON	-0.0566957	-0.124466	0.0110747	-0.0493561	-1.64859	0.100634	0.994471	-4.42803	FALSE
O_LL	HSD11B1	-0.0796257	-0.174893	0.0156416	-0.0294217	-1.64651	0.100974	0.732353	-5.25146	FALSE
F_EL	ADGRG2	-0.0383199	-0.0841713	0.00753149	-0.0102871	-1.64599	0.101022	0.567128	-5.16161	FALSE
F_EL	TSHB	0.113577	-0.0223286	0.249482	0.110905	1.64592	0.101037	0.567128	-5.16242	FALSE
F_LL	WAS	-0.269662	-0.592553	0.0532301	0.308168	-1.64668	0.101172	0.487326	-5.2276	FALSE
O_EL	SPP1	-0.077609	-0.170532	0.0153144	-0.0394179	-1.64391	0.101294	0.899141	-5.06852	FALSE
F_O	ADAM23	0.0657668	-0.0131095	0.144643	-0.0578778	1.64171	0.101836	0.803234	-5.05666	FALSE
F_EL	MPHOSPH8	0.123176	-0.0247673	0.27112	0.176442	1.63979	0.102308	0.567128	-5.19009	FALSE
F_EL	MMP7	-0.0522311	-0.114981	0.0105189	0.00430876	-1.63935	0.102398	0.567128	-5.17939	FALSE
F_LL	FLT3LG	0.0719992	-0.0145391	0.158538	0.0349905	1.64046	0.102459	0.489107	-5.21808	FALSE
F_EL	CEACAM8	0.107615	-0.0216963	0.236927	0.00386162	1.63905	0.10246	0.567128	-5.19018	FALSE
O_EL	CCL14	-0.0453997	-0.0999661	0.00916677	0.0150227	-1.63767	0.102596	0.899141	-5.05899	FALSE
EL_LL	FIS1	-0.109478	-0.241117	0.02216	0.0388375	-1.63889	0.102642	0.994471	-4.44545	FALSE
O_LL	EPHB4	0.0490656	-0.00995094	0.108082	-0.0276528	1.63779	0.102782	0.736997	-5.24639	FALSE
EL_LL	ANGPTL3	-0.0793905	-0.174919	0.016138	-0.0111991	-1.63772	0.102886	0.994471	-4.44395	FALSE
F_LL	CD59	-0.0419772	-0.092626	0.00867169	-0.0427436	-1.63414	0.10378	0.489107	-5.2379	FALSE
F_LL	IL6	0.182788	-0.0378169	0.403393	0.107669	1.63372	0.103867	0.489107	-5.24281	FALSE
EL_LL	GSTA1	-0.17667	-0.390114	0.0367749	0.0084684	-1.6311	0.104276	0.994471	-4.45398	FALSE
O_LL	ITGB1	-0.0324796	-0.0717566	0.00679729	-0.0354649	-1.6291	0.104622	0.741757	-5.25027	FALSE
EL_LL	LY9	0.0589176	-0.012413	0.130248	-0.0241748	1.62769	0.104997	0.994471	-4.45341	FALSE
F_EL	SPARCL1	-0.0645028	-0.14268	0.0136749	-0.0254893	-1.62499	0.105424	0.578458	-5.21842	FALSE
F_LL	PEAR1	-0.0528069	-0.116851	0.011237	-0.0135776	-1.62577	0.105551	0.490697	-5.24918	FALSE
EL_LL	CSF3	-0.115908	-0.256572	0.0247555	-0.00359654	-1.62385	0.105822	0.994471	-4.46307	FALSE
F_LL	FASLG	-0.0772532	-0.171166	0.0166597	-0.0128543	-1.62195	0.106367	0.490697	-5.26682	FALSE
F_EL	CLEC4D	0.116595	-0.0251285	0.258319	0.0180816	1.6203	0.10643	0.578941	-5.21572	FALSE
F_LL	LGALS4	-0.0838776	-0.186078	0.0183223	-0.0386557	-1.61824	0.107165	0.490697	-5.26399	FALSE
O_EL	ANGPTL1	0.0426535	-0.00934645	0.0946535	-0.0378467	1.61452	0.107518	0.929372	-5.11392	FALSE
F_LL	GDF2	-0.0687939	-0.152862	0.0152739	0.0432145	-1.61349	0.108192	0.490697	-5.27296	FALSE
F_EL	KYNU	-0.0898793	-0.199918	0.0201598	-0.0230984	-1.60868	0.108949	0.584156	-5.23828	FALSE
F_O	SPINK4	-0.125479	-0.279096	0.0281375	0.0837408	-1.60831	0.108958	0.839957	-5.13023	FALSE
F_LL	SFTPD	-0.139114	-0.309556	0.0313276	-0.0285545	-1.60932	0.109102	0.490697	-5.28698	FALSE
F_O	SHMT1	0.159347	-0.0358408	0.354534	0.166923	1.60742	0.109154	0.839957	-5.11749	FALSE
F_EL	LRP11	0.0612385	-0.0137976	0.136275	-0.0555533	1.60735	0.10924	0.584156	-5.23054	FALSE
F_LL	DDC	-0.106643	-0.237377	0.0240907	0.0133075	-1.60839	0.109305	0.490697	-5.27935	FALSE
[truncated: 3,246 more rows]

[truncated: 9 more sheets: S7.prot_vs_phase, S8.prot_vs_phase_batch2, S9.prot_vs_hormones, S10.prot_vs_hormones_batch2, S11.enrichment, S12.replication, S13.prot_vs_pheno, S14.prot_vs_pheno_batch2, S15.causality]
