# Supplementary material
Source: Research Square preprint supplement (doi:10.21203/rs.3.rs-9148671/v1)
Supplement: Supplementary file 2 [file 82db6a7ba74f046639b6cc35.xlsx]

## Sheet: Sheet 1
Supplementary Note - Table 1
The table describes for each model, the number of true positives (TP), false negatives (FN), false positives (FP), true negatives (TN) for the 200 simulations performed. Power (at p<0.05) and type 1 error rate are also provided. To facilitate the reader, we also indicate if the simulations are represented in a Supplementary Note Figure
Model	TP	FN	FP	TN	Power	T1E	SN_FIGURE
Covariates_With_largerZ_Long_model_n100	190	10	8	192	0.95	0.04
Covariates_With_largerZ_Long_model_n300	194	6	13	187	0.97	0.065	SN5a
Covariates_With_largerZ_Long_model_n500	195	5	12	188	0.975	0.06	SN4b
Covariates_With_largerZ_Wide_models_n100_int1	163	37	9	191	0.815	0.045	SN4b
Covariates_With_largerZ_Wide_models_n100_int2	184	16	15	185	0.92	0.075	SN4b
Covariates_With_largerZ_Wide_models_n100_int3	186	14	12	188	0.93	0.06
Covariates_With_largerZ_Wide_models_n300_int1	178	22	12	188	0.89	0.06	SN5b
Covariates_With_largerZ_Wide_models_n300_int2	191	9	9	191	0.955	0.045	SN5b
Covariates_With_largerZ_Wide_models_n300_int3	193	7	8	192	0.965	0.04	SN5b
Covariates_With_largerZ_Wide_models_n500_int1	182	18	9	191	0.91	0.045
Covariates_With_largerZ_Wide_models_n500_int2	192	8	8	192	0.96	0.04
Covariates_With_largerZ_Wide_models_n500_int3	195	5	12	188	0.975	0.06
Covariates_With_Z_simulation_Long_model_n100	188	12	9	191	0.94	0.045
Covariates_With_Z_simulation_Long_model_n300	195	5	10	190	0.975	0.05	SN4a
Covariates_With_Z_simulation_Long_model_n500	195	5	7	193	0.975	0.035	SN3b
Covariates_With_Z_simulation_Wide_models_n100_int1	163	37	10	190	0.815	0.05	SN3b
Covariates_With_Z_simulation_Wide_models_n100_int2	180	20	14	186	0.9	0.07	SN3b
Covariates_With_Z_simulation_Wide_models_n100_int3	187	13	10	190	0.935	0.05
Covariates_With_Z_simulation_Wide_models_n300_int1	177	23	12	188	0.885	0.06	SN4b
Covariates_With_Z_simulation_Wide_models_n300_int2	188	12	10	190	0.94	0.05	SN4b
Covariates_With_Z_simulation_Wide_models_n300_int3	195	5	10	190	0.975	0.05	SN4b
Covariates_With_Z_simulation_Wide_models_n500_int1	184	16	11	189	0.92	0.055
Covariates_With_Z_simulation_Wide_models_n500_int2	195	5	3	197	0.975	0.015
Covariates_With_Z_simulation_Wide_models_n500_int3	195	5	7	193	0.975	0.035
Covariates_Without_largerZ_Long_model_n100	29	171	10	190	0.145	0.05
Covariates_Without_largerZ_Long_model_n300	22	178	21	179	0.11	0.105
Covariates_Without_largerZ_Long_model_n500	42	158	20	180	0.21	0.1
Covariates_Without_largerZ_Wide_models_n100_int1	10	190	18	182	0.05	0.09
Covariates_Without_largerZ_Wide_models_n100_int2	10	190	13	187	0.05	0.065
Covariates_Without_largerZ_Wide_models_n100_int3	13	187	6	194	0.065	0.03
Covariates_Without_largerZ_Wide_models_n300_int1	15	185	14	186	0.075	0.07
Covariates_Without_largerZ_Wide_models_n300_int2	9	191	7	193	0.045	0.035
Covariates_Without_largerZ_Wide_models_n300_int3	8	192	11	189	0.04	0.055
Covariates_Without_largerZ_Wide_models_n500_int1	7	193	7	193	0.035	0.035
Covariates_Without_largerZ_Wide_models_n500_int2	11	189	7	193	0.055	0.035
Covariates_Without_largerZ_Wide_models_n500_int3	14	186	8	192	0.07	0.04
Covariates_Without_Z_simulation_Long_model_n100	181	19	11	189	0.905	0.055
Covariates_Without_Z_simulation_Long_model_n300	189	11	21	179	0.945	0.105	SN3a
Covariates_Without_Z_simulation_Long_model_n500	194	6	30	170	0.97	0.15
Covariates_Without_Z_simulation_Wide_models_n100_int1	147	53	12	188	0.735	0.06
Covariates_Without_Z_simulation_Wide_models_n100_int2	169	31	5	195	0.845	0.025
Covariates_Without_Z_simulation_Wide_models_n100_int3	166	34	10	190	0.83	0.05
Covariates_Without_Z_simulation_Wide_models_n300_int1	167	33	11	189	0.835	0.055	SN3b
Covariates_Without_Z_simulation_Wide_models_n300_int2	185	15	10	190	0.925	0.05	SN3b
Covariates_Without_Z_simulation_Wide_models_n300_int3	182	18	17	183	0.91	0.085	SN3b
Covariates_Without_Z_simulation_Wide_models_n500_int1	176	24	10	190	0.88	0.05
Covariates_Without_Z_simulation_Wide_models_n500_int2	188	12	9	191	0.94	0.045
Covariates_Without_Z_simulation_Wide_models_n500_int3	191	9	17	183	0.955	0.085
linear_on_non_linear_cos_Long_model_n100_	200	0	16	184	1	0.08
linear_on_non_linear_cos_Long_model_n300_	200	0	13	187	1	0.065
linear_on_non_linear_cos_Long_model_n500_	200	0	6	194	1	0.03
linear_on_non_linear_cos_Wide_models_n100__int1	200	0	12	188	1	0.06
linear_on_non_linear_cos_Wide_models_n100__int2	200	0	9	191	1	0.045
linear_on_non_linear_cos_Wide_models_n100__int3	200	0	12	188	1	0.06
linear_on_non_linear_cos_Wide_models_n300__int1	200	0	9	191	1	0.045
linear_on_non_linear_cos_Wide_models_n300__int2	200	0	8	192	1	0.04
linear_on_non_linear_cos_Wide_models_n300__int3	200	0	15	185	1	0.075
linear_on_non_linear_cos_Wide_models_n500__int1	200	0	18	182	1	0.09
linear_on_non_linear_cos_Wide_models_n500__int2	200	0	14	186	1	0.07
linear_on_non_linear_cos_Wide_models_n500__int3	200	0	10	190	1	0.05
linear_on_non_linear_cubic_Long_model_n100_	200	0	9	191	1	0.045
linear_on_non_linear_cubic_Long_model_n300_	200	0	6	194	1	0.03
linear_on_non_linear_cubic_Long_model_n500_	200	0	15	185	1	0.075
linear_on_non_linear_cubic_Wide_models_n100__int1	200	0	15	185	1	0.075
linear_on_non_linear_cubic_Wide_models_n100__int2	174	26	7	193	0.87	0.035
linear_on_non_linear_cubic_Wide_models_n100__int3	130	70	6	194	0.65	0.03
linear_on_non_linear_cubic_Wide_models_n300__int1	200	0	13	187	1	0.065
linear_on_non_linear_cubic_Wide_models_n300__int2	198	2	8	192	0.99	0.04
linear_on_non_linear_cubic_Wide_models_n300__int3	173	27	11	189	0.865	0.055
linear_on_non_linear_cubic_Wide_models_n500__int1	200	0	12	188	1	0.06
linear_on_non_linear_cubic_Wide_models_n500__int2	199	1	12	188	0.995	0.06
linear_on_non_linear_cubic_Wide_models_n500__int3	182	18	8	192	0.91	0.04
linear_on_non_linear_exp_Long_model_n100_	200	0	9	191	1	0.045
linear_on_non_linear_exp_Long_model_n300_	200	0	14	186	1	0.07
linear_on_non_linear_exp_Long_model_n500_	200	0	11	189	1	0.055
linear_on_non_linear_exp_Wide_models_n100__int1	200	0	12	188	1	0.06
linear_on_non_linear_exp_Wide_models_n100__int2	200	0	9	191	1	0.045
linear_on_non_linear_exp_Wide_models_n100__int3	200	0	7	193	1	0.035
linear_on_non_linear_exp_Wide_models_n300__int1	200	0	13	187	1	0.065
linear_on_non_linear_exp_Wide_models_n300__int2	200	0	6	194	1	0.03
linear_on_non_linear_exp_Wide_models_n300__int3	200	0	4	196	1	0.02
linear_on_non_linear_exp_Wide_models_n500__int1	200	0	12	188	1	0.06
linear_on_non_linear_exp_Wide_models_n500__int2	200	0	8	192	1	0.04
linear_on_non_linear_exp_Wide_models_n500__int3	200	0	13	187	1	0.065
linear_on_non_linear_linear_Long_model_n100_	200	0	11	189	1	0.055
linear_on_non_linear_linear_Long_model_n300_	200	0	13	187	1	0.065
linear_on_non_linear_linear_Long_model_n500_	200	0	10	190	1	0.05
linear_on_non_linear_linear_Wide_models_n100__int1	200	0	13	187	1	0.065
linear_on_non_linear_linear_Wide_models_n100__int2	200	0	17	183	1	0.085
linear_on_non_linear_linear_Wide_models_n100__int3	200	0	11	189	1	0.055
linear_on_non_linear_linear_Wide_models_n300__int1	200	0	6	194	1	0.03
linear_on_non_linear_linear_Wide_models_n300__int2	200	0	9	191	1	0.045
linear_on_non_linear_linear_Wide_models_n300__int3	200	0	8	192	1	0.04
linear_on_non_linear_linear_Wide_models_n500__int1	200	0	13	187	1	0.065
linear_on_non_linear_linear_Wide_models_n500__int2	200	0	13	187	1	0.065
linear_on_non_linear_linear_Wide_models_n500__int3	200	0	9	191	1	0.045
linear_on_non_linear_log_Long_model_n100_	86	114	17	183	0.43	0.085
linear_on_non_linear_log_Long_model_n300_	91	109	11	189	0.455	0.055
linear_on_non_linear_log_Long_model_n500_	84	116	12	188	0.42	0.06
linear_on_non_linear_log_Wide_models_n100__int1	31	169	12	188	0.155	0.06
linear_on_non_linear_log_Wide_models_n100__int2	30	170	15	185	0.15	0.075
linear_on_non_linear_log_Wide_models_n100__int3	30	170	12	188	0.15	0.06
linear_on_non_linear_log_Wide_models_n300__int1	38	162	8	192	0.19	0.04
linear_on_non_linear_log_Wide_models_n300__int2	39	161	15	185	0.195	0.075
linear_on_non_linear_log_Wide_models_n300__int3	31	169	10	190	0.155	0.05
linear_on_non_linear_log_Wide_models_n500__int1	31	169	4	196	0.155	0.02
linear_on_non_linear_log_Wide_models_n500__int2	29	171	7	193	0.145	0.035
linear_on_non_linear_log_Wide_models_n500__int3	25	175	8	192	0.125	0.04
linear_on_non_linear_quadratic_Long_model_n100_	126	74	8	192	0.63	0.04
linear_on_non_linear_quadratic_Long_model_n300_	92	108	12	188	0.46	0.06
linear_on_non_linear_quadratic_Long_model_n500_	104	96	7	193	0.52	0.035
linear_on_non_linear_quadratic_Wide_models_n100__int1	84	116	13	187	0.42	0.065
linear_on_non_linear_quadratic_Wide_models_n100__int2	43	157	9	191	0.215	0.045
linear_on_non_linear_quadratic_Wide_models_n100__int3	37	163	11	189	0.185	0.055
linear_on_non_linear_quadratic_Wide_models_n300__int1	67	133	9	191	0.335	0.045
linear_on_non_linear_quadratic_Wide_models_n300__int2	37	163	9	191	0.185	0.045
linear_on_non_linear_quadratic_Wide_models_n300__int3	24	176	7	193	0.12	0.035
linear_on_non_linear_quadratic_Wide_models_n500__int1	74	126	10	190	0.37	0.05
linear_on_non_linear_quadratic_Wide_models_n500__int2	37	163	9	191	0.185	0.045
linear_on_non_linear_quadratic_Wide_models_n500__int3	27	173	10	190	0.135	0.05
linear_on_non_linear_with_t_cos_Long_model_n100_	200	0	81	119	1	0.405
linear_on_non_linear_with_t_cos_Long_model_n300_	200	0	166	34	1	0.83	SN8a
linear_on_non_linear_with_t_cos_Long_model_n500_	200	0	191	9	1	0.955
linear_on_non_linear_with_t_cos_Wide_models_n100__int1	200	0	7	193	1	0.035
linear_on_non_linear_with_t_cos_Wide_models_n100__int2	200	0	11	189	1	0.055
linear_on_non_linear_with_t_cos_Wide_models_n100__int3	170	30	15	185	0.85	0.075
linear_on_non_linear_with_t_cos_Wide_models_n300__int1	200	0	13	187	1	0.065	SN8a
linear_on_non_linear_with_t_cos_Wide_models_n300__int2	200	0	8	192	1	0.04	SN8a
linear_on_non_linear_with_t_cos_Wide_models_n300__int3	195	5	13	187	0.975	0.065	SN8a
linear_on_non_linear_with_t_cos_Wide_models_n500__int1	200	0	10	190	1	0.05
linear_on_non_linear_with_t_cos_Wide_models_n500__int2	200	0	10	190	1	0.05
linear_on_non_linear_with_t_cos_Wide_models_n500__int3	200	0	11	189	1	0.055
linear_on_non_linear_with_t_cubic_Long_model_n100_	200	0	133	67	1	0.665
linear_on_non_linear_with_t_cubic_Long_model_n300_	200	0	195	5	1	0.975	SN8e
linear_on_non_linear_with_t_cubic_Long_model_n500_	200	0	200	0	1	1
linear_on_non_linear_with_t_cubic_Wide_models_n100__int1	200	0	16	184	1	0.08
linear_on_non_linear_with_t_cubic_Wide_models_n100__int2	168	32	8	192	0.84	0.04
linear_on_non_linear_with_t_cubic_Wide_models_n100__int3	139	61	12	188	0.695	0.06
linear_on_non_linear_with_t_cubic_Wide_models_n300__int1	200	0	9	191	1	0.045	SN8e
linear_on_non_linear_with_t_cubic_Wide_models_n300__int2	188	12	10	190	0.94	0.05	SN8e
linear_on_non_linear_with_t_cubic_Wide_models_n300__int3	197	3	9	191	0.985	0.045	SN8e
linear_on_non_linear_with_t_cubic_Wide_models_n500__int1	200	0	8	192	1	0.04
linear_on_non_linear_with_t_cubic_Wide_models_n500__int2	198	2	7	193	0.99	0.035
linear_on_non_linear_with_t_cubic_Wide_models_n500__int3	200	0	13	187	1	0.065
linear_on_non_linear_with_t_exp_Long_model_n100_	200	0	200	0	1	1
linear_on_non_linear_with_t_exp_Long_model_n300_	200	0	200	0	1	1	SN8d
linear_on_non_linear_with_t_exp_Long_model_n500_	200	0	200	0	1	1
linear_on_non_linear_with_t_exp_Wide_models_n100__int1	200	0	4	196	1	0.02
linear_on_non_linear_with_t_exp_Wide_models_n100__int2	200	0	11	189	1	0.055
linear_on_non_linear_with_t_exp_Wide_models_n100__int3	200	0	14	186	1	0.07
linear_on_non_linear_with_t_exp_Wide_models_n300__int1	200	0	11	189	1	0.055	SN8d
linear_on_non_linear_with_t_exp_Wide_models_n300__int2	200	0	7	193	1	0.035	SN8d
linear_on_non_linear_with_t_exp_Wide_models_n300__int3	200	0	6	194	1	0.03	SN8d
linear_on_non_linear_with_t_exp_Wide_models_n500__int1	200	0	13	187	1	0.065
linear_on_non_linear_with_t_exp_Wide_models_n500__int2	200	0	9	191	1	0.045
linear_on_non_linear_with_t_exp_Wide_models_n500__int3	200	0	9	191	1	0.045
linear_on_non_linear_with_t_linear_Long_model_n100_	200	0	169	31	1	0.845
linear_on_non_linear_with_t_linear_Long_model_n300_	200	0	200	0	1	1	SN8f
linear_on_non_linear_with_t_linear_Long_model_n500_	200	0	200	0	1	1
linear_on_non_linear_with_t_linear_Wide_models_n100__int1	200	0	6	194	1	0.03
linear_on_non_linear_with_t_linear_Wide_models_n100__int2	200	0	13	187	1	0.065
linear_on_non_linear_with_t_linear_Wide_models_n100__int3	200	0	11	189	1	0.055
linear_on_non_linear_with_t_linear_Wide_models_n300__int1	200	0	23	177	1	0.115	SN8f
linear_on_non_linear_with_t_linear_Wide_models_n300__int2	200	0	6	194	1	0.03	SN8f
linear_on_non_linear_with_t_linear_Wide_models_n300__int3	200	0	6	194	1	0.03	SN8f
linear_on_non_linear_with_t_linear_Wide_models_n500__int1	200	0	8	192	1	0.04
linear_on_non_linear_with_t_linear_Wide_models_n500__int2	200	0	9	191	1	0.045
linear_on_non_linear_with_t_linear_Wide_models_n500__int3	200	0	11	189	1	0.055
linear_on_non_linear_with_t_log_Long_model_n100_	200	0	200	0	1	1
linear_on_non_linear_with_t_log_Long_model_n300_	200	0	200	0	1	1	SN8c
linear_on_non_linear_with_t_log_Long_model_n500_	200	0	200	0	1	1
linear_on_non_linear_with_t_log_Wide_models_n100__int1	35	165	17	183	0.175	0.085
linear_on_non_linear_with_t_log_Wide_models_n100__int2	197	3	9	191	0.985	0.045
linear_on_non_linear_with_t_log_Wide_models_n100__int3	200	0	15	185	1	0.075
linear_on_non_linear_with_t_log_Wide_models_n300__int1	42	158	5	195	0.21	0.025	SN8c
linear_on_non_linear_with_t_log_Wide_models_n300__int2	200	0	9	191	1	0.045	SN8c
linear_on_non_linear_with_t_log_Wide_models_n300__int3	200	0	14	186	1	0.07	SN8c
linear_on_non_linear_with_t_log_Wide_models_n500__int1	28	172	12	188	0.14	0.06
linear_on_non_linear_with_t_log_Wide_models_n500__int2	200	0	3	197	1	0.015
linear_on_non_linear_with_t_log_Wide_models_n500__int3	200	0	9	191	1	0.045
linear_on_non_linear_with_t_quadratic_Long_model_n100_	200	0	200	0	1	1
linear_on_non_linear_with_t_quadratic_Long_model_n300_	200	0	200	0	1	1	SN8b
linear_on_non_linear_with_t_quadratic_Long_model_n500_	200	0	200	0	1	1
linear_on_non_linear_with_t_quadratic_Wide_models_n100__int1	68	132	8	192	0.34	0.04
linear_on_non_linear_with_t_quadratic_Wide_models_n100__int2	200	0	10	190	1	0.05
linear_on_non_linear_with_t_quadratic_Wide_models_n100__int3	200	0	10	190	1	0.05
linear_on_non_linear_with_t_quadratic_Wide_models_n300__int1	81	119	18	182	0.405	0.09	SN8b
linear_on_non_linear_with_t_quadratic_Wide_models_n300__int2	200	0	10	190	1	0.05	SN8b
linear_on_non_linear_with_t_quadratic_Wide_models_n300__int3	200	0	12	188	1	0.06	SN8b
linear_on_non_linear_with_t_quadratic_Wide_models_n500__int1	75	125	10	190	0.375	0.05
linear_on_non_linear_with_t_quadratic_Wide_models_n500__int2	200	0	8	192	1	0.04
linear_on_non_linear_with_t_quadratic_Wide_models_n500__int3	200	0	7	193	1	0.035
Nonlinear_with_time_Long_model_n100_cos	200	0	89	111	1	0.445
Nonlinear_with_time_Long_model_n100_cubic	200	0	124	76	1	0.62
Nonlinear_with_time_Long_model_n100_exp	200	0	200	0	1	1
Nonlinear_with_time_Long_model_n100_linear	200	0	174	26	1	0.87
Nonlinear_with_time_Long_model_n100_log	200	0	200	0	1	1
Nonlinear_with_time_Long_model_n100_quadratic	200	0	200	0	1	1
Nonlinear_with_time_Long_model_n300_cos	200	0	200	0	1	1	SN9a
Nonlinear_with_time_Long_model_n300_cubic	200	0	195	5	1	0.975	SN9e
Nonlinear_with_time_Long_model_n300_exp	200	0	200	0	1	1	SN9d
Nonlinear_with_time_Long_model_n300_linear	200	0	200	0	1	1	SN9f
Nonlinear_with_time_Long_model_n300_log	200	0	200	0	1	1	SN9c
Nonlinear_with_time_Long_model_n300_quadratic	200	0	200	0	1	1	SN9b
Nonlinear_with_time_Long_model_n500_cos	200	0	200	0	1	1
Nonlinear_with_time_Long_model_n500_cubic	200	0	200	0	1	1
Nonlinear_with_time_Long_model_n500_exp	200	0	200	0	1	1
Nonlinear_with_time_Long_model_n500_linear	200	0	200	0	1	1
Nonlinear_with_time_Long_model_n500_log	200	0	200	0	1	1
Nonlinear_with_time_Long_model_n500_quadratic	200	0	200	0	1	1
Nonlinear_with_time_Wide_models_n100_cos_int1	200	0	11	189	1	0.055
Nonlinear_with_time_Wide_models_n100_cos_int2	200	0	14	186	1	0.07
Nonlinear_with_time_Wide_models_n100_cos_int3	200	0	7	193	1	0.035
Nonlinear_with_time_Wide_models_n100_cubic_int1	200	0	17	183	1	0.085
Nonlinear_with_time_Wide_models_n100_cubic_int2	200	0	9	191	1	0.045
Nonlinear_with_time_Wide_models_n100_cubic_int3	200	0	15	185	1	0.075
Nonlinear_with_time_Wide_models_n100_exp_int1	200	0	11	189	1	0.055
Nonlinear_with_time_Wide_models_n100_exp_int2	200	0	9	191	1	0.045
Nonlinear_with_time_Wide_models_n100_exp_int3	200	0	9	191	1	0.045
Nonlinear_with_time_Wide_models_n100_linear_int1	200	0	8	192	1	0.04
Nonlinear_with_time_Wide_models_n100_linear_int2	200	0	8	192	1	0.04
Nonlinear_with_time_Wide_models_n100_linear_int3	200	0	14	186	1	0.07
Nonlinear_with_time_Wide_models_n100_log_int1	200	0	16	184	1	0.08
Nonlinear_with_time_Wide_models_n100_log_int2	200	0	12	188	1	0.06
Nonlinear_with_time_Wide_models_n100_log_int3	200	0	7	193	1	0.035
Nonlinear_with_time_Wide_models_n100_quadratic_int1	200	0	18	182	1	0.09
Nonlinear_with_time_Wide_models_n100_quadratic_int2	200	0	11	189	1	0.055
Nonlinear_with_time_Wide_models_n100_quadratic_int3	200	0	12	188	1	0.06
Nonlinear_with_time_Wide_models_n300_cos_int1	200	0	13	187	1	0.065	SN9a
Nonlinear_with_time_Wide_models_n300_cos_int2	200	0	7	193	1	0.035	SN9a
Nonlinear_with_time_Wide_models_n300_cos_int3	200	0	8	192	1	0.04	SN9a
Nonlinear_with_time_Wide_models_n300_cubic_int1	200	0	6	194	1	0.03	SN9e
Nonlinear_with_time_Wide_models_n300_cubic_int2	200	0	21	179	1	0.105	SN9e
Nonlinear_with_time_Wide_models_n300_cubic_int3	200	0	16	184	1	0.08	SN9e
Nonlinear_with_time_Wide_models_n300_exp_int1	200	0	8	192	1	0.04	SN9d
Nonlinear_with_time_Wide_models_n300_exp_int2	200	0	11	189	1	0.055	SN9d
Nonlinear_with_time_Wide_models_n300_exp_int3	200	0	14	186	1	0.07	SN9d
Nonlinear_with_time_Wide_models_n300_linear_int1	200	0	13	187	1	0.065	SN9f
Nonlinear_with_time_Wide_models_n300_linear_int2	200	0	9	191	1	0.045	SN9f
Nonlinear_with_time_Wide_models_n300_linear_int3	200	0	14	186	1	0.07	SN9f
Nonlinear_with_time_Wide_models_n300_log_int1	200	0	16	184	1	0.08	SN9c
Nonlinear_with_time_Wide_models_n300_log_int2	200	0	16	184	1	0.08	SN9c
Nonlinear_with_time_Wide_models_n300_log_int3	200	0	12	188	1	0.06	SN9c
Nonlinear_with_time_Wide_models_n300_quadratic_int1	200	0	9	191	1	0.045	SN9b
Nonlinear_with_time_Wide_models_n300_quadratic_int2	200	0	13	187	1	0.065	SN9b
Nonlinear_with_time_Wide_models_n300_quadratic_int3	200	0	8	192	1	0.04	SN9b
Nonlinear_with_time_Wide_models_n500_cos_int1	200	0	11	189	1	0.055
Nonlinear_with_time_Wide_models_n500_cos_int2	200	0	12	188	1	0.06
Nonlinear_with_time_Wide_models_n500_cos_int3	200	0	9	191	1	0.045
Nonlinear_with_time_Wide_models_n500_cubic_int1	200	0	13	187	1	0.065
Nonlinear_with_time_Wide_models_n500_cubic_int2	200	0	12	188	1	0.06
Nonlinear_with_time_Wide_models_n500_cubic_int3	200	0	6	194	1	0.03
Nonlinear_with_time_Wide_models_n500_exp_int1	200	0	8	192	1	0.04
Nonlinear_with_time_Wide_models_n500_exp_int2	200	0	8	192	1	0.04
Nonlinear_with_time_Wide_models_n500_exp_int3	200	0	6	194	1	0.03
Nonlinear_with_time_Wide_models_n500_linear_int1	200	0	15	185	1	0.075
Nonlinear_with_time_Wide_models_n500_linear_int2	200	0	15	185	1	0.075
Nonlinear_with_time_Wide_models_n500_linear_int3	200	0	11	189	1	0.055
Nonlinear_with_time_Wide_models_n500_log_int1	200	0	8	192	1	0.04
Nonlinear_with_time_Wide_models_n500_log_int2	200	0	12	188	1	0.06
Nonlinear_with_time_Wide_models_n500_log_int3	200	0	12	188	1	0.06
Nonlinear_with_time_Wide_models_n500_quadratic_int1	200	0	11	189	1	0.055
Nonlinear_with_time_Wide_models_n500_quadratic_int2	200	0	9	191	1	0.045
Nonlinear_with_time_Wide_models_n500_quadratic_int3	200	0	17	183	1	0.085
Linear_simulation_with_-0.2_Long_model_n100	190	10	13	187	0.95	0.065
Linear_simulation_with_-0.2_Long_model_n300	196	4	10	190	0.98	0.05
Linear_simulation_with_-0.2_Long_model_n500	196	4	14	186	0.98	0.07
Linear_simulation_with_-0.2_Wide_models_n100_int1	158	42	13	187	0.79	0.065
Linear_simulation_with_-0.2_Wide_models_n100_int2	185	15	11	189	0.925	0.055
Linear_simulation_with_-0.2_Wide_models_n100_int3	188	12	14	186	0.94	0.07
Linear_simulation_with_-0.2_Wide_models_n300_int1	176	24	7	193	0.88	0.035
Linear_simulation_with_-0.2_Wide_models_n300_int2	190	10	10	190	0.95	0.05
Linear_simulation_with_-0.2_Wide_models_n300_int3	192	8	6	194	0.96	0.03
Linear_simulation_with_-0.2_Wide_models_n500_int1	183	17	15	185	0.915	0.075
Linear_simulation_with_-0.2_Wide_models_n500_int2	193	7	10	190	0.965	0.05
Linear_simulation_with_-0.2_Wide_models_n500_int3	193	7	11	189	0.965	0.055
Linear_simulation_with_-1.2_Long_model_n100	191	9	11	189	0.955	0.055
Linear_simulation_with_-1.2_Long_model_n300	195	5	33	167	0.975	0.165
Linear_simulation_with_-1.2_Long_model_n500	196	4	33	167	0.98	0.165
Linear_simulation_with_-1.2_Wide_models_n100_int1	157	43	14	186	0.785	0.07
Linear_simulation_with_-1.2_Wide_models_n100_int2	179	21	14	186	0.895	0.07
Linear_simulation_with_-1.2_Wide_models_n100_int3	186	14	9	191	0.93	0.045
Linear_simulation_with_-1.2_Wide_models_n300_int1	175	25	14	186	0.875	0.07
Linear_simulation_with_-1.2_Wide_models_n300_int2	190	10	9	191	0.95	0.045
Linear_simulation_with_-1.2_Wide_models_n300_int3	192	8	10	190	0.96	0.05
Linear_simulation_with_-1.2_Wide_models_n500_int1	183	17	11	189	0.915	0.055
Linear_simulation_with_-1.2_Wide_models_n500_int2	192	8	14	186	0.96	0.07
Linear_simulation_with_-1.2_Wide_models_n500_int3	191	9	8	192	0.955	0.04
Linear_simulation_with_0_Long_model_n100	192	8	10	190	0.96	0.05
Linear_simulation_with_0_Long_model_n300	195	5	14	186	0.975	0.07
Linear_simulation_with_0_Long_model_n500	194	6	13	187	0.97	0.065
Linear_simulation_with_0_Wide_models_n100_int1	166	34	8	192	0.83	0.04
Linear_simulation_with_0_Wide_models_n100_int2	181	19	10	190	0.905	0.05
Linear_simulation_with_0_Wide_models_n100_int3	188	12	13	187	0.94	0.065
Linear_simulation_with_0_Wide_models_n300_int1	175	25	8	192	0.875	0.04
Linear_simulation_with_0_Wide_models_n300_int2	191	9	17	183	0.955	0.085
Linear_simulation_with_0_Wide_models_n300_int3	193	7	14	186	0.965	0.07
Linear_simulation_with_0_Wide_models_n500_int1	187	13	13	187	0.935	0.065
Linear_simulation_with_0_Wide_models_n500_int2	194	6	11	189	0.97	0.055
Linear_simulation_with_0_Wide_models_n500_int3	193	7	8	192	0.965	0.04
Linear_simulation_with_0.2_Long_model_n100	189	11	10	190	0.945	0.05
Linear_simulation_with_0.2_Long_model_n300	195	5	8	192	0.975	0.04	SN1a
Linear_simulation_with_0.2_Long_model_n500	195	5	10	190	0.975	0.05
Linear_simulation_with_0.2_Wide_models_n100_int1	160	40	12	188	0.8	0.06
Linear_simulation_with_0.2_Wide_models_n100_int2	184	16	11	189	0.92	0.055
Linear_simulation_with_0.2_Wide_models_n100_int3	188	12	10	190	0.94	0.05
Linear_simulation_with_0.2_Wide_models_n300_int1	179	21	6	194	0.895	0.03	SN1b
Linear_simulation_with_0.2_Wide_models_n300_int2	191	9	7	193	0.955	0.035	SN1b
Linear_simulation_with_0.2_Wide_models_n300_int3	194	6	9	191	0.97	0.045	SN1b
Linear_simulation_with_0.2_Wide_models_n500_int1	185	15	8	192	0.925	0.04
Linear_simulation_with_0.2_Wide_models_n500_int2	194	6	12	188	0.97	0.06
Linear_simulation_with_0.2_Wide_models_n500_int3	194	6	12	188	0.97	0.06
Linear_simulation_with_1.2_Long_model_n100	194	6	17	183	0.97	0.085
Linear_simulation_with_1.2_Long_model_n300	198	2	27	173	0.99	0.135
Linear_simulation_with_1.2_Long_model_n500	198	2	38	162	0.99	0.19
Linear_simulation_with_1.2_Wide_models_n100_int1	161	39	10	190	0.805	0.05
Linear_simulation_with_1.2_Wide_models_n100_int2	185	15	11	189	0.925	0.055
Linear_simulation_with_1.2_Wide_models_n100_int3	187	13	12	188	0.935	0.06
Linear_simulation_with_1.2_Wide_models_n300_int1	175	25	13	187	0.875	0.065
Linear_simulation_with_1.2_Wide_models_n300_int2	192	8	12	188	0.96	0.06
Linear_simulation_with_1.2_Wide_models_n300_int3	192	8	12	188	0.96	0.06
Linear_simulation_with_1.2_Wide_models_n500_int1	178	22	13	187	0.89	0.065
Linear_simulation_with_1.2_Wide_models_n500_int2	192	8	9	191	0.96	0.045
Linear_simulation_with_1.2_Wide_models_n500_int3	195	5	13	187	0.975	0.065
Quadratic_simulation_with_0.2_Long_model_n100	194	6	19	181	0.97	0.095
Quadratic_simulation_with_0.2_Long_model_n300	195	5	34	166	0.975	0.17
Quadratic_simulation_with_0.2_Long_model_n500	196	4	51	149	0.98	0.255
Quadratic_simulation_with_0.2_Wide_models_n100_int1	160	40	8	192	0.8	0.04
Quadratic_simulation_with_0.2_Wide_models_n100_int2	180	20	7	193	0.9	0.035
Quadratic_simulation_with_0.2_Wide_models_n100_int3	189	11	10	190	0.945	0.05
Quadratic_simulation_with_0.2_Wide_models_n300_int1	182	18	15	185	0.91	0.075
Quadratic_simulation_with_0.2_Wide_models_n300_int2	188	12	10	190	0.94	0.05
Quadratic_simulation_with_0.2_Wide_models_n300_int3	193	7	10	190	0.965	0.05
Quadratic_simulation_with_0.2_Wide_models_n500_int1	180	20	15	185	0.9	0.075
Quadratic_simulation_with_0.2_Wide_models_n500_int2	191	9	9	191	0.955	0.045
Quadratic_simulation_with_0.2_Wide_models_n500_int3	192	8	7	193	0.96	0.035
Quadratic_simulation_with_1.2_Long_model_n100	197	3	95	105	0.985	0.475
Quadratic_simulation_with_1.2_Long_model_n300	198	2	153	47	0.99	0.765	SN2a
Quadratic_simulation_with_1.2_Long_model_n500	199	1	171	29	0.995	0.855
Quadratic_simulation_with_1.2_Wide_models_n100_int1	156	44	14	186	0.78	0.07
Quadratic_simulation_with_1.2_Wide_models_n100_int2	180	20	6	194	0.9	0.03
Quadratic_simulation_with_1.2_Wide_models_n100_int3	187	13	8	192	0.935	0.04
Quadratic_simulation_with_1.2_Wide_models_n300_int1	175	25	10	190	0.875	0.05	SN2b
Quadratic_simulation_with_1.2_Wide_models_n300_int2	187	13	9	191	0.935	0.045	SN2b
Quadratic_simulation_with_1.2_Wide_models_n300_int3	191	9	6	194	0.955	0.03	SN2b
Quadratic_simulation_with_1.2_Wide_models_n500_int1	185	15	17	183	0.925	0.085
Quadratic_simulation_with_1.2_Wide_models_n500_int2	195	5	10	190	0.975	0.05
Quadratic_simulation_with_1.2_Wide_models_n500_int3	193	7	5	195	0.965	0.025
Missing_MAR_impute_simulation_with_0.1_Long_model_n100	192	8	12	188	0.96	0.06
Missing_MAR_impute_simulation_with_0.1_Long_model_n300	193	7	13	187	0.965	0.065
Missing_MAR_impute_simulation_with_0.1_Long_model_n500	195	5	6	194	0.975	0.03
Missing_MAR_impute_simulation_with_0.1_Wide_models_n100_int1	159	41	9	191	0.795	0.045
Missing_MAR_impute_simulation_with_0.1_Wide_models_n100_int2	182	18	3	197	0.91	0.015
Missing_MAR_impute_simulation_with_0.1_Wide_models_n100_int3	187	13	9	191	0.935	0.045
Missing_MAR_impute_simulation_with_0.1_Wide_models_n300_int1	176	24	7	193	0.88	0.035
Missing_MAR_impute_simulation_with_0.1_Wide_models_n300_int2	191	9	8	192	0.955	0.04
Missing_MAR_impute_simulation_with_0.1_Wide_models_n300_int3	193	7	10	190	0.965	0.05
Missing_MAR_impute_simulation_with_0.1_Wide_models_n500_int1	180	20	3	197	0.9	0.015
Missing_MAR_impute_simulation_with_0.1_Wide_models_n500_int2	194	6	7	193	0.97	0.035
Missing_MAR_impute_simulation_with_0.1_Wide_models_n500_int3	195	5	9	191	0.975	0.045
Missing_MAR_impute_simulation_with_0.2_Long_model_n100	188	12	10	190	0.94	0.05
Missing_MAR_impute_simulation_with_0.2_Long_model_n300	195	5	11	189	0.975	0.055
Missing_MAR_impute_simulation_with_0.2_Long_model_n500	194	6	11	189	0.97	0.055
Missing_MAR_impute_simulation_with_0.2_Wide_models_n100_int1	153	47	11	189	0.765	0.055
Missing_MAR_impute_simulation_with_0.2_Wide_models_n100_int2	181	19	5	195	0.905	0.025
Missing_MAR_impute_simulation_with_0.2_Wide_models_n100_int3	188	12	8	192	0.94	0.04
Missing_MAR_impute_simulation_with_0.2_Wide_models_n300_int1	177	23	10	190	0.885	0.05
Missing_MAR_impute_simulation_with_0.2_Wide_models_n300_int2	186	14	11	189	0.93	0.055
Missing_MAR_impute_simulation_with_0.2_Wide_models_n300_int3	195	5	11	189	0.975	0.055
Missing_MAR_impute_simulation_with_0.2_Wide_models_n500_int1	179	21	10	190	0.895	0.05
Missing_MAR_impute_simulation_with_0.2_Wide_models_n500_int2	192	8	11	189	0.96	0.055
Missing_MAR_impute_simulation_with_0.2_Wide_models_n500_int3	194	6	6	194	0.97	0.03
Missing_MAR_impute_simulation_with_0.3_Long_model_n100	190	10	8	192	0.95	0.04
Missing_MAR_impute_simulation_with_0.3_Long_model_n300	195	5	12	188	0.975	0.06
Missing_MAR_impute_simulation_with_0.3_Long_model_n500	198	2	4	196	0.99	0.02
Missing_MAR_impute_simulation_with_0.3_Wide_models_n100_int1	156	44	11	189	0.78	0.055
Missing_MAR_impute_simulation_with_0.3_Wide_models_n100_int2	181	19	9	191	0.905	0.045
Missing_MAR_impute_simulation_with_0.3_Wide_models_n100_int3	185	15	7	193	0.925	0.035
Missing_MAR_impute_simulation_with_0.3_Wide_models_n300_int1	179	21	14	186	0.895	0.07
Missing_MAR_impute_simulation_with_0.3_Wide_models_n300_int2	191	9	13	187	0.955	0.065
Missing_MAR_impute_simulation_with_0.3_Wide_models_n300_int3	194	6	14	186	0.97	0.07
Missing_MAR_impute_simulation_with_0.3_Wide_models_n500_int1	179	21	9	191	0.895	0.045
Missing_MAR_impute_simulation_with_0.3_Wide_models_n500_int2	193	7	6	194	0.965	0.03
Missing_MAR_impute_simulation_with_0.3_Wide_models_n500_int3	197	3	5	195	0.985	0.025
Missing_MAR_Omit_simulation_with_0.1_Long_model_n100	191	9	14	186	0.955	0.07
Missing_MAR_Omit_simulation_with_0.1_Long_model_n300	194	6	5	195	0.97	0.025
Missing_MAR_Omit_simulation_with_0.1_Long_model_n500	194	6	8	192	0.97	0.04
Missing_MAR_Omit_simulation_with_0.1_Wide_models_n100_int1	158	42	6	194	0.79	0.03
Missing_MAR_Omit_simulation_with_0.1_Wide_models_n100_int2	185	15	10	190	0.925	0.05
Missing_MAR_Omit_simulation_with_0.1_Wide_models_n100_int3	186	14	12	188	0.93	0.06
Missing_MAR_Omit_simulation_with_0.1_Wide_models_n300_int1	176	24	6	194	0.88	0.03
Missing_MAR_Omit_simulation_with_0.1_Wide_models_n300_int2	187	13	7	193	0.935	0.035
Missing_MAR_Omit_simulation_with_0.1_Wide_models_n300_int3	192	8	7	193	0.96	0.035
Missing_MAR_Omit_simulation_with_0.1_Wide_models_n500_int1	183	17	14	186	0.915	0.07
Missing_MAR_Omit_simulation_with_0.1_Wide_models_n500_int2	190	10	15	185	0.95	0.075
Missing_MAR_Omit_simulation_with_0.1_Wide_models_n500_int3	195	5	10	190	0.975	0.05
Missing_MAR_Omit_simulation_with_0.2_Long_model_n100	189	11	10	190	0.945	0.05
Missing_MAR_Omit_simulation_with_0.2_Long_model_n300	193	7	7	193	0.965	0.035
Missing_MAR_Omit_simulation_with_0.2_Long_model_n500	197	3	11	189	0.985	0.055
Missing_MAR_Omit_simulation_with_0.2_Wide_models_n100_int1	159	41	17	183	0.795	0.085
Missing_MAR_Omit_simulation_with_0.2_Wide_models_n100_int2	182	18	6	194	0.91	0.03
Missing_MAR_Omit_simulation_with_0.2_Wide_models_n100_int3	188	12	12	188	0.94	0.06
Missing_MAR_Omit_simulation_with_0.2_Wide_models_n300_int1	173	27	15	185	0.865	0.075
Missing_MAR_Omit_simulation_with_0.2_Wide_models_n300_int2	188	12	13	187	0.94	0.065
Missing_MAR_Omit_simulation_with_0.2_Wide_models_n300_int3	191	9	9	191	0.955	0.045
Missing_MAR_Omit_simulation_with_0.2_Wide_models_n500_int1	185	15	14	186	0.925	0.07
Missing_MAR_Omit_simulation_with_0.2_Wide_models_n500_int2	191	9	13	187	0.955	0.065
Missing_MAR_Omit_simulation_with_0.2_Wide_models_n500_int3	196	4	7	193	0.98	0.035
Missing_MAR_Omit_simulation_with_0.3_Long_model_n100	190	10	10	190	0.95	0.05
Missing_MAR_Omit_simulation_with_0.3_Long_model_n300	196	4	12	188	0.98	0.06
Missing_MAR_Omit_simulation_with_0.3_Long_model_n500	197	3	6	194	0.985	0.03
Missing_MAR_Omit_simulation_with_0.3_Wide_models_n100_int1	159	41	10	190	0.795	0.05
Missing_MAR_Omit_simulation_with_0.3_Wide_models_n100_int2	183	17	13	187	0.915	0.065
Missing_MAR_Omit_simulation_with_0.3_Wide_models_n100_int3	188	12	12	188	0.94	0.06
Missing_MAR_Omit_simulation_with_0.3_Wide_models_n300_int1	174	26	9	191	0.87	0.045
Missing_MAR_Omit_simulation_with_0.3_Wide_models_n300_int2	194	6	15	185	0.97	0.075
Missing_MAR_Omit_simulation_with_0.3_Wide_models_n300_int3	190	10	11	189	0.95	0.055
Missing_MAR_Omit_simulation_with_0.3_Wide_models_n500_int1	180	20	11	189	0.9	0.055
Missing_MAR_Omit_simulation_with_0.3_Wide_models_n500_int2	194	6	10	190	0.97	0.05
Missing_MAR_Omit_simulation_with_0.3_Wide_models_n500_int3	194	6	5	195	0.97	0.025
Missing_MNAR_impute_simulation_with_0.1_Long_model_n100	188	12	7	193	0.94	0.035
Missing_MNAR_impute_simulation_with_0.1_Long_model_n300	192	8	14	186	0.96	0.07
Missing_MNAR_impute_simulation_with_0.1_Long_model_n500	196	4	11	189	0.98	0.055
Missing_MNAR_impute_simulation_with_0.1_Wide_models_n100_int1	162	38	12	188	0.81	0.06
Missing_MNAR_impute_simulation_with_0.1_Wide_models_n100_int2	179	21	9	191	0.895	0.045
Missing_MNAR_impute_simulation_with_0.1_Wide_models_n100_int3	185	15	10	190	0.925	0.05
Missing_MNAR_impute_simulation_with_0.1_Wide_models_n300_int1	171	29	11	189	0.855	0.055
Missing_MNAR_impute_simulation_with_0.1_Wide_models_n300_int2	188	12	9	191	0.94	0.045
Missing_MNAR_impute_simulation_with_0.1_Wide_models_n300_int3	191	9	8	192	0.955	0.04
Missing_MNAR_impute_simulation_with_0.1_Wide_models_n500_int1	178	22	11	189	0.89	0.055
Missing_MNAR_impute_simulation_with_0.1_Wide_models_n500_int2	193	7	11	189	0.965	0.055
Missing_MNAR_impute_simulation_with_0.1_Wide_models_n500_int3	190	10	5	195	0.95	0.025
Missing_MNAR_impute_simulation_with_0.2_Long_model_n100	189	11	10	190	0.945	0.05
Missing_MNAR_impute_simulation_with_0.2_Long_model_n300	194	6	12	188	0.97	0.06
Missing_MNAR_impute_simulation_with_0.2_Long_model_n500	196	4	14	186	0.98	0.07
Missing_MNAR_impute_simulation_with_0.2_Wide_models_n100_int1	152	48	11	189	0.76	0.055
Missing_MNAR_impute_simulation_with_0.2_Wide_models_n100_int2	181	19	7	193	0.905	0.035
Missing_MNAR_impute_simulation_with_0.2_Wide_models_n100_int3	183	17	9	191	0.915	0.045
Missing_MNAR_impute_simulation_with_0.2_Wide_models_n300_int1	171	29	8	192	0.855	0.04
Missing_MNAR_impute_simulation_with_0.2_Wide_models_n300_int2	185	15	10	190	0.925	0.05
Missing_MNAR_impute_simulation_with_0.2_Wide_models_n300_int3	188	12	10	190	0.94	0.05
Missing_MNAR_impute_simulation_with_0.2_Wide_models_n500_int1	182	18	12	188	0.91	0.06
Missing_MNAR_impute_simulation_with_0.2_Wide_models_n500_int2	189	11	13	187	0.945	0.065
Missing_MNAR_impute_simulation_with_0.2_Wide_models_n500_int3	192	8	11	189	0.96	0.055
Missing_MNAR_impute_simulation_with_0.3_Long_model_n100	189	11	6	194	0.945	0.03
Missing_MNAR_impute_simulation_with_0.3_Long_model_n300	194	6	12	188	0.97	0.06	SN7a
Missing_MNAR_impute_simulation_with_0.3_Long_model_n500	196	4	5	195	0.98	0.025
Missing_MNAR_impute_simulation_with_0.3_Wide_models_n100_int1	146	54	9	191	0.73	0.045
Missing_MNAR_impute_simulation_with_0.3_Wide_models_n100_int2	174	26	8	192	0.87	0.04
Missing_MNAR_impute_simulation_with_0.3_Wide_models_n100_int3	173	27	14	186	0.865	0.07
Missing_MNAR_impute_simulation_with_0.3_Wide_models_n300_int1	168	32	7	193	0.84	0.035	SN7b
Missing_MNAR_impute_simulation_with_0.3_Wide_models_n300_int2	186	14	8	192	0.93	0.04	SN7b
Missing_MNAR_impute_simulation_with_0.3_Wide_models_n300_int3	189	11	10	190	0.945	0.05	SN7b
Missing_MNAR_impute_simulation_with_0.3_Wide_models_n500_int1	180	20	8	192	0.9	0.04
Missing_MNAR_impute_simulation_with_0.3_Wide_models_n500_int2	188	12	12	188	0.94	0.06
Missing_MNAR_impute_simulation_with_0.3_Wide_models_n500_int3	190	10	8	192	0.95	0.04
Missing_MNAR_Omit_simulation_with_0.1_Long_model_n100	192	8	7	193	0.96	0.035
Missing_MNAR_Omit_simulation_with_0.1_Long_model_n300	195	5	7	193	0.975	0.035
Missing_MNAR_Omit_simulation_with_0.1_Long_model_n500	194	6	13	187	0.97	0.065
Missing_MNAR_Omit_simulation_with_0.1_Wide_models_n100_int1	154	46	14	186	0.77	0.07
Missing_MNAR_Omit_simulation_with_0.1_Wide_models_n100_int2	182	18	16	184	0.91	0.08
Missing_MNAR_Omit_simulation_with_0.1_Wide_models_n100_int3	187	13	11	189	0.935	0.055
Missing_MNAR_Omit_simulation_with_0.1_Wide_models_n300_int1	175	25	8	192	0.875	0.04
Missing_MNAR_Omit_simulation_with_0.1_Wide_models_n300_int2	187	13	10	190	0.935	0.05
Missing_MNAR_Omit_simulation_with_0.1_Wide_models_n300_int3	192	8	15	185	0.96	0.075
Missing_MNAR_Omit_simulation_with_0.1_Wide_models_n500_int1	182	18	6	194	0.91	0.03
Missing_MNAR_Omit_simulation_with_0.1_Wide_models_n500_int2	190	10	5	195	0.95	0.025
Missing_MNAR_Omit_simulation_with_0.1_Wide_models_n500_int3	192	8	12	188	0.96	0.06
Missing_MNAR_Omit_simulation_with_0.2_Long_model_n100	189	11	8	192	0.945	0.04
Missing_MNAR_Omit_simulation_with_0.2_Long_model_n300	195	5	5	195	0.975	0.025
Missing_MNAR_Omit_simulation_with_0.2_Long_model_n500	195	5	15	185	0.975	0.075
Missing_MNAR_Omit_simulation_with_0.2_Wide_models_n100_int1	153	47	12	188	0.765	0.06
Missing_MNAR_Omit_simulation_with_0.2_Wide_models_n100_int2	180	20	14	186	0.9	0.07
Missing_MNAR_Omit_simulation_with_0.2_Wide_models_n100_int3	185	15	13	187	0.925	0.065
Missing_MNAR_Omit_simulation_with_0.2_Wide_models_n300	190	10	11	189	0.95	0.055
Missing_MNAR_Omit_simulation_with_0.2_Wide_models_n500	191	9	10	190	0.955	0.05
Missing_MNAR_Omit_simulation_with_0.3_Long_model_n100	184	16	11	189	0.92	0.055
Missing_MNAR_Omit_simulation_with_0.3_Long_model_n300	191	9	8	192	0.955	0.04	SN6a
Missing_MNAR_Omit_simulation_with_0.3_Long_model_n500	194	6	9	191	0.97	0.045
Missing_MNAR_Omit_simulation_with_0.3_Wide_models_n100_int1	144	56	11	189	0.72	0.055
Missing_MNAR_Omit_simulation_with_0.3_Wide_models_n100_int2	174	26	11	189	0.87	0.055
Missing_MNAR_Omit_simulation_with_0.3_Wide_models_n100_int3	178	22	7	193	0.89	0.035
Missing_MNAR_Omit_simulation_with_0.3_Wide_models_n300_int1	170	30	13	187	0.85	0.065	SN6b
Missing_MNAR_Omit_simulation_with_0.3_Wide_models_n300_int2	182	18	6	194	0.91	0.03	SN6b
Missing_MNAR_Omit_simulation_with_0.3_Wide_models_n300_int3	184	16	4	196	0.92	0.02	SN6b
Missing_MNAR_Omit_simulation_with_0.3_Wide_models_n500_int1	178	22	13	187	0.89	0.065
Missing_MNAR_Omit_simulation_with_0.3_Wide_models_n500_int2	191	9	6	194	0.955	0.03
Missing_MNAR_Omit_simulation_with_0.3_Wide_models_n500_int3	189	11	9	191	0.945	0.045
Quadratic_simulation_with_0_Long_model_n100	188	12	7	193	0.94	0.035
Quadratic_simulation_with_0_Long_model_n300	193	7	11	189	0.965	0.055
Quadratic_simulation_with_0_Long_model_n500	196	4	13	187	0.98	0.065
Quadratic_simulation_with_0_Wide_models_n100_int1	158	42	12	188	0.79	0.06
Quadratic_simulation_with_0_Wide_models_n100_int2	184	16	14	186	0.92	0.07
Quadratic_simulation_with_0_Wide_models_n100_int3	184	16	13	187	0.92	0.065
Quadratic_simulation_with_0_Wide_models_n300_int1	171	29	10	190	0.855	0.05
Quadratic_simulation_with_0_Wide_models_n300_int2	189	11	10	190	0.945	0.05
Quadratic_simulation_with_0_Wide_models_n300_int3	192	8	9	191	0.96	0.045
Quadratic_simulation_with_0_Wide_models_n500_int1	179	21	11	189	0.895	0.055
Quadratic_simulation_with_0_Wide_models_n500_int2	193	7	10	190	0.965	0.05
Quadratic_simulation_with_0_Wide_models_n500_int3	196	4	9	191	0.98	0.045
Nonlinear_Long_model_n100_cos	200	0	3	197	1	0.015
Nonlinear_Long_model_n100_cubic	200	0	11	189	1	0.055
Nonlinear_Long_model_n100_exp	200	0	11	189	1	0.055
Nonlinear_Long_model_n100_linear	200	0	3	197	1	0.015
Nonlinear_Long_model_n100_log	42	158	6	194	0.21	0.03
Nonlinear_Long_model_n100_quadratic	88	112	5	195	0.44	0.025
Nonlinear_Long_model_n300_cos	200	0	4	196	1	0.02	SN10a
Nonlinear_Long_model_n300_cubic	200	0	9	191	1	0.045	SN10e
Nonlinear_Long_model_n300_exp	200	0	6	194	1	0.03	SN10d
Nonlinear_Long_model_n300_linear	200	0	5	195	1	0.025	SN10f
Nonlinear_Long_model_n300_log	47	153	3	197	0.235	0.015	SN10c
Nonlinear_Long_model_n300_quadratic	74	126	6	194	0.37	0.03	SN10b
Nonlinear_Long_model_n500_cos	200	0	3	197	1	0.015	SN9a
Nonlinear_Long_model_n500_cubic	200	0	11	189	1	0.055	SN9a
Nonlinear_Long_model_n500_exp	200	0	8	192	1	0.04	SN9a
Nonlinear_Long_model_n500_linear	200	0	2	198	1	0.01	SN9e
Nonlinear_Long_model_n500_log	177	23	2	198	0.885	0.01	SN9e
Nonlinear_Long_model_n500_quadratic	95	105	6	194	0.475	0.03	SN9e
Nonlinear_Wide_models_n100_cos_int1	200	0	11	189	1	0.055	SN9d
Nonlinear_Wide_models_n100_cos_int2	200	0	13	187	1	0.065	SN9d
Nonlinear_Wide_models_n100_cos_int3	200	0	5	195	1	0.025	SN9d
Nonlinear_Wide_models_n100_cubic_int1	200	0	10	190	1	0.05	SN9f
Nonlinear_Wide_models_n100_cubic_int2	200	0	11	189	1	0.055	SN9f
Nonlinear_Wide_models_n100_cubic_int3	200	0	12	188	1	0.06	SN9f
Nonlinear_Wide_models_n100_exp_int1	200	0	11	189	1	0.055	SN9c
Nonlinear_Wide_models_n100_exp_int2	200	0	12	188	1	0.06	SN9c
Nonlinear_Wide_models_n100_exp_int3	200	0	15	185	1	0.075	SN9c
Nonlinear_Wide_models_n100_linear_int1	200	0	16	184	1	0.08	SN9b
Nonlinear_Wide_models_n100_linear_int2	200	0	7	193	1	0.035	SN9b
Nonlinear_Wide_models_n100_linear_int3	200	0	10	190	1	0.05	SN9b
Nonlinear_Wide_models_n100_log_int1	200	0	10	190	1	0.05
Nonlinear_Wide_models_n100_log_int2	200	0	18	182	1	0.09
Nonlinear_Wide_models_n100_log_int3	200	0	12	188	1	0.06
Nonlinear_Wide_models_n100_quadratic_int1	200	0	9	191	1	0.045
Nonlinear_Wide_models_n100_quadratic_int2	200	0	14	186	1	0.07
Nonlinear_Wide_models_n100_quadratic_int3	200	0	12	188	1	0.06
Nonlinear_Wide_models_n300_cos_int1	200	0	4	196	1	0.02	SN10a
Nonlinear_Wide_models_n300_cos_int2	200	0	8	192	1	0.04	SN10a
Nonlinear_Wide_models_n300_cos_int3	200	0	13	187	1	0.065	SN10a
Nonlinear_Wide_models_n300_cubic_int1	200	0	14	186	1	0.07	SN10e
Nonlinear_Wide_models_n300_cubic_int2	200	0	9	191	1	0.045	SN10e
Nonlinear_Wide_models_n300_cubic_int3	200	0	9	191	1	0.045	SN10e
Nonlinear_Wide_models_n300_exp_int1	200	0	13	187	1	0.065	SN10d
Nonlinear_Wide_models_n300_exp_int2	200	0	8	192	1	0.04	SN10d
Nonlinear_Wide_models_n300_exp_int3	200	0	13	187	1	0.065	SN10d
Nonlinear_Wide_models_n300_linear_int1	200	0	9	191	1	0.045	SN10f
Nonlinear_Wide_models_n300_linear_int2	200	0	10	190	1	0.05	SN10f
Nonlinear_Wide_models_n300_linear_int3	200	0	15	185	1	0.075	SN10f
Nonlinear_Wide_models_n300_log_int1	200	0	9	191	1	0.045	SN10c
Nonlinear_Wide_models_n300_log_int2	200	0	15	185	1	0.075	SN10c
Nonlinear_Wide_models_n300_log_int3	200	0	15	185	1	0.075	SN10c
Nonlinear_Wide_models_n300_quadratic_int1	200	0	13	187	1	0.065	SN10b
Nonlinear_Wide_models_n300_quadratic_int2	200	0	9	191	1	0.045	SN10b
Nonlinear_Wide_models_n300_quadratic_int3	200	0	13	187	1	0.065	SN10b
Nonlinear_Wide_models_n500_cos_int1	200	0	16	184	1	0.08
Nonlinear_Wide_models_n500_cos_int2	200	0	7	193	1	0.035
Nonlinear_Wide_models_n500_cos_int3	200	0	14	186	1	0.07
Nonlinear_Wide_models_n500_cubic_int1	200	0	4	196	1	0.02
Nonlinear_Wide_models_n500_cubic_int2	200	0	5	195	1	0.025
Nonlinear_Wide_models_n500_cubic_int3	200	0	14	186	1	0.07
Nonlinear_Wide_models_n500_exp_int1	200	0	7	193	1	0.035
Nonlinear_Wide_models_n500_exp_int2	200	0	9	191	1	0.045
Nonlinear_Wide_models_n500_exp_int3	200	0	14	186	1	0.07
Nonlinear_Wide_models_n500_linear_int1	200	0	11	189	1	0.055
Nonlinear_Wide_models_n500_linear_int2	200	0	13	187	1	0.065
Nonlinear_Wide_models_n500_linear_int3	200	0	7	193	1	0.035
Nonlinear_Wide_models_n500_log_int1	200	0	11	189	1	0.055
Nonlinear_Wide_models_n500_log_int2	200	0	9	191	1	0.045
Nonlinear_Wide_models_n500_log_int3	200	0	13	187	1	0.065
Nonlinear_Wide_models_n500_quadratic_int1	200	0	11	189	1	0.055
Nonlinear_Wide_models_n500_quadratic_int2	200	0	7	193	1	0.035
Nonlinear_Wide_models_n500_quadratic_int3	200	0	4	196	1	0.02
Quadratic_simulation_with_-0.2_Long_model_n100	191	9	18	182	0.955	0.09
Quadratic_simulation_with_-0.2_Long_model_n300	198	2	36	164	0.99	0.18
Quadratic_simulation_with_-0.2_Long_model_n500	197	3	40	160	0.985	0.2
Quadratic_simulation_with_-0.2_Wide_models_n100_int1	156	44	15	185	0.78	0.075
Quadratic_simulation_with_-0.2_Wide_models_n100_int2	181	19	7	193	0.905	0.035
Quadratic_simulation_with_-0.2_Wide_models_n100_int3	185	15	8	192	0.925	0.04
Quadratic_simulation_with_-0.2_Wide_models_n300_int1	175	25	8	192	0.875	0.04
Quadratic_simulation_with_-0.2_Wide_models_n300_int2	191	9	10	190	0.955	0.05
Quadratic_simulation_with_-0.2_Wide_models_n300_int3	193	7	7	193	0.965	0.035
Quadratic_simulation_with_-0.2_Wide_models_n500_int1	182	18	15	185	0.91	0.075
Quadratic_simulation_with_-0.2_Wide_models_n500_int2	193	7	13	187	0.965	0.065
Quadratic_simulation_with_-0.2_Wide_models_n500_int3	195	5	4	196	0.975	0.02
Quadratic_simulation_with_-1.2_Long_model_n100	196	4	108	92	0.98	0.54
Quadratic_simulation_with_-1.2_Long_model_n300	197	3	158	42	0.985	0.79
Quadratic_simulation_with_-1.2_Long_model_n500	198	2	164	36	0.99	0.82
Quadratic_simulation_with_-1.2_Wide_models_n100_int1	159	41	8	192	0.795	0.04
Quadratic_simulation_with_-1.2_Wide_models_n100_int2	183	17	5	195	0.915	0.025
Quadratic_simulation_with_-1.2_Wide_models_n100_int3	188	12	10	190	0.94	0.05
Quadratic_simulation_with_-1.2_Wide_models_n300_int1	183	17	8	192	0.915	0.04
Quadratic_simulation_with_-1.2_Wide_models_n300_int2	191	9	12	188	0.955	0.06
Quadratic_simulation_with_-1.2_Wide_models_n300_int3	194	6	5	195	0.97	0.025
Quadratic_simulation_with_-1.2_Wide_models_n500_int1	178	22	12	188	0.89	0.06
Quadratic_simulation_with_-1.2_Wide_models_n500_int2	192	8	9	191	0.96	0.045
Quadratic_simulation_with_-1.2_Wide_models_n500_int3	196	4	10	190	0.98	0.05
